# Supplementary material for: Cells Lacking the RB1 Tumor Suppressor Gene Are Hyperdependent on Aurora B Kinase for Survival
Source: Oxford University Press journal article supplement (doi:10.1158/2159-8290.cd-18-0389), 2018-10-29
Supplement: 21598290cd180389-sup-199905_2_supp_5048780_pfvs96.xlsx [file 21598290cd180389-sup-199905_2_supp_5048780_pfvs96.xlsx]

## Sheet: RB+ Enrichment D30 vs. D13
Gene	Hairpins	# sgRNAs	sgRNA ranks	NES	Gene rank	p-value	p-value rank	# sgRNAs 500	# sgRNAs 1000	# sgRNAs 5000	# sgRNAs 10000
E2F8	AAGGCTCTCAGGGAGAGCCG, CGCAACAGAGATCAGAAAAG, CTTGGCACCTTGAAGAGCAT, GATGCTCTTCAAGGTGCCAA, GCTGTGGTGGATTCTTTCAG, TTAAAGGGCCAAAGTCAGGC	6	66, 1123, 8, 78, 603, 264	0.01611	1	0.0008	1	4	5	6	6
PRMT7	AGTACCTTGCAATCTCCTGG, ATAAACTTAGGAAAATTGTG, CAGCCACTCCACAGACCCCG, GTCGGGCCAATCCGACCACG, TATCAACAAGCATTCCACCG, TGAACACTATGATTACCACC	6	144, 13, 321, 1849, 313, 714	0.03516	8	0.0036	8	4	5	6	6
EID1	ACTGCTCTCTTCATACAGCT, ATGGATGTGATGCCTGGCGA, CCGCAGATGGAGGTAGGCAG, GATGGATGTGATGCCTGGCG, GCTCGAGGAGGAAGGCCCAA, TGTTGGGCCCCGCTGCGGGA	6	145, 56, 287, 2572, 166, 6203	0.0354	9	0.0037	9	4	4	5	6
SETD7	ATCCACATAATACCCCTCCA, CCTCCACAGACAGATTTGAG, GACGATGACGGATTACCGCA, GTGACTGTGCAGAACCCGTG, TATGTAGACGGAGAGCTGAA, TTATGTCCACTGAAGAAGGG	6	1676, 624, 73, 179, 1597, 57	0.01782	2	0.0009	2	3	4	6	6
TRIM24	AAGTTTATCAAACGTGGAGG, AATCACAGCCCCAAACCCAA, AGGACAACGCAGAAGCCAAT, CCACACTGTCAGACAGAAAG, CCTCGGCTGCGGCCTCCGGG, TTATGAAAAGGACAAAACAC	6	3689, 1172, 189, 2305, 444, 191	0.04663	13	0.0078	13	3	3	6	6
TNKS	AGGAGCTGATCCAAATGCCA, CTAATGTAGGATCAGCGCCA, GAGCTTGGCGGAGAGCCCCG, GCAGTTTACTCCACTGCACG, GGAAGATGAGGAAGAAGTCG, TGGCCCCCTTCGCCTCCCCG	6	6555, 219, 120, 907, 3782, 451	0.05347	16	0.0103	16	3	4	5	6
ARID4B	AGACTTGTACACAAACTTGG, ATGTGCCAAAGATAAAACAT, GATGTGAGTGCTAAATACAG, GTAGAACTATTCCTGCTAAC, GTGCCCACTGTCAAATAGGG, TGAGCCTCCCTATTTGACAG	6	1817, 405, 529, 175, 277, 779	0.06763	21	0.015	21	3	5	6	6
MBD1	AGAGGGTGAGATCACACGCA, CCACAGTTCTCACAGCACCT, CGAGGGTGTGGAGTATGCCG, CTGACTTGCGAAAGACTTCG, GCCCCCCGCCAACAGAGCCG, GCTCAGACACCTATTACCAG	6	1431, 412, 8856, 372, 1988, 160	0.09082	35	0.0279	35	3	3	5	6
PHF21B	CCCGACCCAGGAGAACCCCG, CTTACCTTCCAAATGTTCCG, GGACACGTACCTTCCAGCAG, GTTACCACGGAACATTTGGA, TGAGATGGCTCCTCTGTGGG, TTGTCAGCACTGATGAGGAG	6	2429, 375, 1934, 4542, 408, 390	0.09521	37	0.0313	37	3	3	6	6
ATF7IP2	ACACCACTCAATACACTGGG, ACTTGCTTCCGGCAACTTAG, AGCCCCCTCATGCTCAAAAA, ATTGGGAGTAATGTTCCAAG, CTGAAACTCTGATTACCGCT, GTCTACAGTAACCAGTACCG	6	655, 2338, 428, 3365, 494, 127	0.1045	44	0.0366	44	3	4	6	6
PAWR	CGTGACGAGGAGGAGCCGGA, GCAAGGGGCAGATCGAGAAG, GCTGCTGGTCCGGTAGCCAC, GGGGGCTCTGGGCACCCCGG, GGGTGCCCAGAGCCCCCGCG, GGTGGCTACCGGACCAGCAG	6	4992, 5432, 89, 5616, 52, 1262	0.02173	3	0.0011	3	2	2	4	6
TDRD12	ACATAATCTGGCTTCCACCT, CCACAAGGAAACATTCTGCC, CTATTTAGCAACTACCCAGG, GCACTGGCTTACCTTTCAGA, GCTGTTGTAGAAGTCATTCA, TGTCCTTCTTCCAATGTTAA	6	4068, 97, 54, 3204, 1719, 1738	0.02368	4	0.0013	4	2	2	6	6
KMT2B	CGATTCGTAGATCTTCAGGT, GCAGATGGAGGAGGTGGCCG, GCCATACCTTAAAATCCACA, GGAGATTCATCGGAATCCCA, TCTGCGCTCCGATCCCAGCG, TCTTCATCCATAAATCGCCG	6	5952, 2486, 3623, 4793, 106, 81	0.02588	5	0.0016	5	2	2	5	6
HTATIP2	AAGTCACGCTCATTGGCCGG, GAGGAAGCTCACCTTCGACG, GCTGGCGCCCAAAATAAAGA, GGAAGCTTATAAAAATGTGG, GTCTTCCCGAAGCTTCGACA, TTAAAGGAAATCCTGGAGCA	6	1729, 90, 1919, 4766, 122, 7596	0.02979	6	0.0025	6	2	2	5	6
SLC22A6	GCTTCTGTGCCATTGAGAAA, GGCAGCAGTGAAGTTCTGCA, GGCTGCCCCTGCCTGTCCCG, GTTCTTGCTGAGGTTGGCAT, GTTGTCATAGATCCAGCCAT, TCAAGATGAGTACCTTCCGG	6	2577, 85, 1628, 143, 3504, 1477	0.03491	7	0.0035	7	2	2	6	6
CREBBP	ATTAACTTACTGGAATTCCG, GCAGCCGTGGAAGCAGGAGG, GGTAGCCTATGCTAAGAAAG, GTACGAGTCTGCCAACAGCA, TAATTAATCAGGCTTCACAA, TGGACCTCTCCACCATCAAG	6	4132, 7894, 29, 150, 773, 7050	0.03662	10	0.004	10	2	3	4	6
INO80E	ACTTCTGCAGTACGAGAACG, AGGAGCTGAGGAAAGCGCAA, CGTTCTCGTACTGCAGAAGT, GCTGTTATCTGATGATGCAG, GGAGCACGAGTGCTTCCAGG, TCTCCCTGCCTCCTTCAACA	6	176, 858, 2092, 3249, 114, 8059	0.04297	11	0.0058	11	2	3	5	6
DNMT3A	AGGATGTGACACTCACCGGG, CATGCCCTCCAGCGGCCCCG, GGGACTTGGAGATCACCGCA, TGACACGCCAAAGGACCCTG, TGGCGCTCCTCCTTGCCACG, TTACATTTGCAGGTGGAAAG	6	6986, 6205, 1430, 134, 3794, 177	0.04321	12	0.0059	12	2	2	4	6
SMARCD3	CCTGATGCTGAGGATTCCGA, CTCTTGGTCTTACCTCAACG, GAAGCGGGTGGACATCCAGG, GGAAGCACCTACCTGTACCA, GTTTCCTCTCAAATGCCAAG, TCTTCAGCACCCACCCACCG	6	203, 1060, 6415, 2196, 95, 2740	0.04956	14	0.0088	14	2	2	5	6
RBP1	CAGAGCCCCCTGTCCCCGGA, CAGCGGCTGCCGGTGCTACG, GCAGAGCCCCCTGTCCCCGG, GCGCGCACAAAGCCTGCGGG, GCTACAATGGATCCTCCCGC, GCTGGAGACTGCCGGGACAG	6	4947, 217, 2407, 7400, 16, 6277	0.05298	15	0.01	15	2	2	4	6
AFF1	AATCTGTCACCGAAGCACAG, CATGGGCCGGACATAAGCCG, CTAATGTTGCCAACAGAAAG, GCTTATGTCCGGCCCATGGA, GGAAGCCCACCAAGAGAAAG, TCTGACAGCTCCTCTTTCCG	6	72, 1480, 223, 659, 2035, 6493	0.05444	17	0.0107	17	2	3	5	6
XIAP	ATGACAACTAAAGCACCGCA, CCAAATTGCAGATTTATCAA, CTGGTGAAGGAGATACCGTG, GCTGAAACAGGACTACCACT, TATCAGACACCATATACCCG, TCTTCCTTATTGATGTCTGC	6	235, 3655, 206, 2350, 6142, 2822	0.05737	18	0.0114	18	2	2	5	6
JAK2	ATAATCATACCTGAGCAAAG, ATCTGCCTCAGATTTCCCAA, CTGCCACTGCAATACCAACG, CTTACGATGACAGAAATGGA, GAGGTGCTACTTCTTTACAG, GCTTATGGATAGTTACAACT	6	268, 5181, 4665, 6060, 165, 3434	0.06543	19	0.014	19	2	2	4	6
RB1	AGAGCAGGACAGCGGCCCGG, ATATGGTTCTTTGAGCAACA, CTGCTCGCTCACCTGACGAG, GCTCTGGGTCCTCCTCAGGA, GGTTCTTTGAGCAACATGGG, GTTCGAGGTGAACCATTAAT	6	8150, 3273, 5423, 2632, 36, 276	0.06738	20	0.015	20	2	2	4	6
PTGS1	ACGAGTGTAATAGCTCACGT, CATCCCGCCCCAGAGCCAGA, CCTTCAGCAGGTCACACACA, GATGGGTCCTGGCTTCACCA, GTGTTGATGCACTACCCCCG, TGGAGCGTCAGTATCAACTG	6	1948, 4125, 884, 224, 293, 2810	0.07153	22	0.0173	22	2	3	6	6
TOP2B	ATGCTGCTGACAATAAACAG, GTATTCCTGAATTTGACGAA, GTGTACACTGATATTAACAG, TGCTGCTGACAATAAACAGA, TGTAGGAATGAATTGCAGGG, TTAGTCTGAGAATCAAAAGT	6	6139, 154, 6581, 1880, 296, 4450	0.07227	23	0.0179	23	2	2	4	6
ASXL1	ACAGGAGTCAGAACAAGCAG, AGAGGAGTCAGGACAACTCG, GACTCCTCTGAAGGTAAACG, GAGAGTTGATCAGGGCACGG, TACCTGATGCAGATTCCACG, TCACCACTGCCATAGAGAGG	6	6135, 297, 4630, 3674, 83, 5212	0.07251	24	0.018	24	2	2	4	6
CECR2	AGACATCGTCTGCATCCAGC, GCAGCTCCACACAGCCCCCG, GCAGGGGATGAGAAAAACCT, GCTGCTGCACAGGCTCCCCG, GGTGTCCCACCACAATGCAG, GTAGAGCTGCCGTTCTCGAA	6	1291, 1613, 3875, 4422, 308, 252	0.0752	25	0.0189	25	2	2	6	6
DNMT3B	ACTGTCTGCCTCCACCTGCG, CCAGCCACCTCTGATCTCCG, GATCGAGTCTTCCCTCCCGC, GGGGATGAAGATCAGAGCCG, GGTCCTCCAATGAGTCTCCA, TATAACAACGGCAAAGACCG	6	2750, 2769, 309, 55, 4488, 1935	0.07544	26	0.019	26	2	2	6	6
CDKN2A	ACGAAAACCCTCACTCGCGG, CCTCAGTAGCATCAGCACGA, CTACCTGGTCTTCTAGGAAG, GCACGCGCGCCGAATCCGGA, GCCCACTCCCCCGTGAGCCG, TCACATCCCGCGGCTCACGG	6	3625, 263, 3635, 557, 311, 702	0.07593	27	0.0195	27	2	4	6	6
CRTC1	AATGGAAGAGACCACATCAG, ATCTTCTCGCTGAATTTCCG, GCACAATCAGAAGCAGGCGG, GCTGCACAATCAGAAGCAGG, GGGCAGCCCCCTTACCCGCG, TGGCGACTTCGAACAATCCG	6	6169, 2513, 7455, 162, 6368, 328	0.08008	28	0.0215	28	2	2	3	6
MECOM	ACTATGGCGCCGGATATCCA, AGCCGGAAGGAAACAGACCA, GATGATGTCAGTACACCAAG, GCAGTCTGCTCCTCTAAAGA, GCTGAGTGAGGAGTACTGCA, GCTTATTGTCCCCTACAGAT	6	2105, 5157, 290, 525, 338, 1011	0.08252	29	0.0228	29	2	3	5	6
NFYA	AAGTGGCACAGACTGCTGAA, CCTGGACAGATCCAGATCCA, GGACAGATCCAGATCCAGGG, GTACCTGTTTCTGGAACACA, GTTTGCTGTATACTGCTCCA, TTAATGGTGCAGGTCAGTGG	6	22, 4586, 7982, 5634, 339, 4646	0.08276	30	0.0231	30	2	2	4	6
STK38	AGTGGAGGCAGACAGTTTGT, ATACCTTGCTGTCCAAAAGA, GAGTAACCACACAAAGGAAA, GCTTGTTCAGAAGAAAGATA, GGAACTCCATGATTAGGTAG, TGTTGAGCCTGTCATTGCCA	6	2189, 2903, 341, 359, 4557, 5177	0.08765	31	0.026	31	2	2	5	6
HMGXB4	AGAGCTTTCTGAAAACAGCC, ATAGCTGTATCAGTAGACTG, ATTCTGTCACCAAAGGAGAA, CAAGCCCTCCAAAAAGACTG, CACGGAGTCATCATAAGCCA, TAAACCATCAGGCTCCCGAA	6	829, 364, 4716, 47, 1191, 2933	0.08887	32	0.0268	32	2	3	6	6
CENPV	AGAGCTCCTCGATCGCCGCA, AGCCGCCGTCGGAGAAGCCG, GCGCGGGCAGAAGCGGTCCG, GCGGCGATCGAGGAGCTCTG, GGCCGGGAGCAAGAGCCAGG, GGCGACGAGCGCCTCAGCCG	6	6254, 366, 20, 895, 7552, 3287	0.08936	33	0.027	33	2	3	4	6
RSF1	AGAGGATTCTGAGTTCACAA, CATCAAACTGACACTCACAG, CCTCATGTACTGGTACCAAT, CTAGAACATTGGCTGTAGAA, CTGAGGCTAGTTTCTCACAG, GGATGAGGAGACTAAAAAAG	6	3554, 2834, 371, 1111, 315, 2851	0.09058	34	0.0278	34	2	2	6	6
TDRKH	AGAGCGGCTGACATTTGTTG, CCTGTGACAAAGAATCAGAA, GAAGACATGACAGAGCCAGG, GCAAGGAGCCAATATTAAAC, GCTGTGGTAGTGTCAAAGGA, TGCTCATTCTGCAGAAACCA	6	5723, 380, 261, 2210, 4469, 2760	0.09277	36	0.0297	36	2	2	5	6
CCAR2	ATACAATTCCTCCAACCCCG, CTTGGCTTCTTAGCACCCCA, GCACGGACAGAAAATCTGAG, GGAGGAGTGAGCAAACCAGG, TACTGCTGCTCTCTTCCCCG, TTACCTTCGAACTATAAGCG	6	952, 1419, 398, 2848, 170, 805	0.09717	38	0.032	38	2	4	6	6
YAF2	AGTGCATGATGTGCGATGTG, ATGATGTGCGATGTGCGGAA, CACCTTCCGGAACAGCGCCG, CATCATGCACTTGAAGGCCT, GCAGGGACAGCAAGGAAGGG, GTCCCAGTAACCCTCATCCG	6	676, 562, 4133, 399, 6563, 152	0.09741	39	0.0321	39	2	4	5	6
LIF	CCCCTCAGTACACAGCCCAG, CCCTCAGTACACAGCCCAGG, GCCCATAATGAAGGTCTTGG, GCCCCTCAGTACACAGCCCA, GCCCTTCCACGCCAACGGCA, GCTATGTGGCCCCAACGTGA	6	3520, 7986, 632, 5217, 410, 260	0.1001	40	0.0336	40	2	3	4	6
ABAT	CTGTTGGATGAGTTTCAGCA, GTGAATGGCTTTAGAGTGCG, TGATGAAGACGGAAGTCCCA, TGATGGGCCTCTGATGAAGA, TGCAATTACGAAGAGAGCCG, TTCTTTCTCCAAGAATGCAG	6	4345, 2914, 4084, 419, 4875, 181	0.1023	41	0.0356	41	2	2	6	6
TDRD3	CCAAAAGGCACAAAAGGCGG, GCTTCAGTAAGGAAGCATCG, GTTATGGGTCCTCCTCTGAG, TGAATTTGAAAAGCAAAGGA, TGCCTGGTATCATTTCGAGG, TGTCCAAAAGGCACAAAAGG	6	5569, 302, 422, 4767, 6751, 2949	0.103	42	0.0358	42	2	2	4	6
HILS1	AAGACACTTCACCTACCCCA, AGTCCAAGCTCAAGGTCAAG, GCCTCGCATTCTTTCCCACG, GCCTGCCTCATTAATTGCAG, GCTTATCAAGGGGGTTCGAA, GGAGGCCTGCTTCTTGCCCA	6	386, 932, 426, 1974, 4452, 2184	0.104	43	0.0364	43	2	3	6	6
PHF6	AATATCTGAAAACCAGAAGG, ACTAATATCTGAAAACCAGA, CATTGTCCTGGAGCAACAAT, CTTTATCATGCAATGCACAG, GCTCAGTTGAACAGAAAAAA, TCTGATAATGAAAGTCTTGG	6	434, 6923, 2036, 6281, 115, 1200	0.106	45	0.0374	45	2	2	4	6
PHGDH	CGCAGCTGAGAAACTCCAGG, GCAAGATCTTCCGGCAGCAA, GCAGTCTGGCCAGTGTGCCG, GCCCAGGCCAAGAATTCCCA, GCGACGGCTTCGATGAAGGA, GGAAGATCTTGCAAGATGGA	6	6783, 4859, 440, 6913, 112, 6497	0.1074	46	0.0384	46	2	2	3	6
E2F7	ACACAGTTCAGGCTTCTGAG, ACAGCCTGCCAAAAACCCTG, GCTCCTCTCCTAGTCTCTGG, GTGCATGTAACAGAAGAGCG, GTTTGTTGACAGACAGCAAG, TAGTCTCTGGAGGTTCCTCA	6	2054, 446, 53, 1464, 1693, 994	0.1089	47	0.039	47	2	3	6	6
ARID4A	AGATAGAATTAAAATCTCCG, GATGCTAGTTGGTATACCGT, GATGTCAGTGCCAAGTACCG, GCAAGTTGACAGATGCTAGT, GTACAAGATGACCAAGTAAA, TGAACTGAATATTTGCCGAA	6	916, 5001, 360, 447, 3755, 1601	0.1091	48	0.0392	48	2	3	5	6
P4HTM	CCAGCGGCCTGAGACCGCGG, CGAGGCCTCCTCGGCCGCCG, CGTCCGCTGTGCAAGCCCCG, CTTCATCAGTCAGGAAGCCG, GCGCGCGAGCAGATGCCGCG, GCGGACTTACCGAAGAGCAG	6	6158, 266, 6754, 3694, 449, 6695	0.1096	49	0.0396	49	2	2	3	6
INO80B	ACCTTCACTGTGATCCCAGA, ATAAGGGGAGAGGGTGAGCG, GACAAGTCCTGGGGACCAAG, GTTTGAGCTGAGGCTTGGCA, TCTGGGATCACAGTGAAGGT, TTTGAGCTGAGGCTTGGCAG	6	4076, 4404, 4891, 413, 457, 1672	0.1116	50	0.0405	50	2	2	6	6
H1F0	ACTGGCGCGAGGAGCCAGCG, CTTCTGAATGGACTGGCGCG, GGCTAGCCGGAAGGACCCCG, GGTCTGCTTGAGGACACCGG, GGTGTCCTCAAGCAGACCAA, GTGTCCTCAAGCAGACCAAA	6	111, 7286, 1531, 5082, 460, 1290	0.1123	51	0.041	51	2	2	4	6
SIAH2	ACAGGGAAACAGGACTGCCG, GACCGGACACTCGAAGAGCG, GGCAGCAGCTCAACTTCTGG, GGCGGCGGCTGCTTGCTGCA, GGCTATGGAGAAGGTGGCCT, GGTCAGCTCGTGGTGCTGCG	6	3973, 256, 3092, 461, 2726, 623	0.1125	52	0.0411	52	2	3	6	6
PARP12	AACAAAGGAGATGGACCCCA, CCGCAGCTCGGGCAACTCCA, CTCACTTCTGGCAAAAGCCA, GGTCACCCAGGTGCTGTGCG, GGTCGTTCTGAAACAAGAGT, TGAAAGGCACAAGAGCCGTG	6	2858, 1535, 4725, 151, 469, 5731	0.1145	53	0.0426	53	2	2	5	6
NFATC3	ACTAAGAGAAGACTCCCGGT, ACTGAAATGGAAAAACTGCA, TATGAAACTGAAGGTAGCCG, TCACCTGGTCACTCCCCCAG, TCTCCTGGTGGCTCTCCAGG, TGAAACTGAAGGTAGCCGAG	6	3894, 477, 129, 1017, 8718, 6253	0.1165	54	0.0441	54	2	2	4	6
CTSL	ACTGCACAATCAGGAATACA, AGATGTTCCGGAAAACTGGG, CTGGGGGCCTCATAAAACAG, GCTTTCAAAACCGTAAGCCC, GTTGTGCATCGCCTTCCACT, TCTCCAATCCACAGATCTGG	6	3502, 478, 5317, 5254, 346, 8602	0.1167	55	0.0443	55	2	2	3	6
FBXL19	AGAAGCTAGAGCGTTTCAAG, GAGACATGAAGAAGTTCGGG, GAGCGGATGGAAGCTGACAG, GCTCCCTCCCGAGAACTGGG, GGCCTCTGCAGAGGGCCCAG, TGAGGGGCCTGGCCGCCGTA	6	482, 4845, 5495, 156, 7497, 709	0.1177	56	0.0455	56	2	3	4	6
ALDH2	ACAATGTTGACCACACCAGG, CTATGTCATCTCCTACCTGG, GCACAATGTTGACCACACCA, GGACCATGTCCAAATCCACC, GGCTGGGCTGATAAGTACCA, TCATCTGTCAGGTAGCTGAA	6	4353, 4726, 490, 4428, 107, 2871	0.1196	57	0.0471	57	2	2	6	6
ALKBH3	AGCAACCAAGACTTACAGCA, ATGCCAGTCCTCTGTTTCCA, ATTCTTGCCTGGCTGAGCAA, GCCAGGATACAAACAGACCC, GCTTACCTAGATACACCTGT, TCTTTCACGTCAACAAAGCC	6	492, 1402, 765, 251, 4983, 2900	0.1201	58	0.0475	58	2	3	6	6
CBFA2T2	CACCTTCTCCCCAATCTCAG, CTCCCACCAATAAATCCTGG, GTAATGCTGAAGAGGTGGAG, GTACATACTCTCTTGGCAGG, GTGAGAGCAGGACTGTGCCG, GTGCCCCTCATGAATCCCGG	6	1635, 4045, 500, 992, 5647, 249	0.1221	59	0.049	59	2	3	5	6
GRIP1	AGGTAGTTAGGGCAACCCCA, AGTAGAGTACGAGCTTCCAC, CTACTGTACTTACAGACCGG, GCTTCGATATAGGAAATCAG, GTCGCCTCAGAATTTGACAA, TGTTCACACAGAAACCACAG	6	1363, 913, 502, 4693, 211, 4040	0.1226	60	0.0492	60	1	3	6	6
GFI1	GCACCTGCTCGGCTAGGCGC, GCAGCTGTCTGGGGATGCGG, GCGCCGGTACATTCTCTAAA, GCTGCGATTCGGGGGACAAA, GTACTCATGGAGCGGCCTGG, TGGGCACATTGACTTCTCCG	6	2627, 7089, 435, 504, 3033, 2319	0.123	61	0.0493	61	1	2	5	6
BAZ2B	CCAGTGAATTGAGATCCAAA, GAAGGTGTCGAAGATGAAGT, GACACTGTGGACAGGTTAAA, GCTAAGTGAAGCAACTCCAG, GCTGGGGGAGCAAATAGTGG, TCTTTAGTGGAACAATTCAG	6	704, 511, 1, 3727, 2587, 4979	0.1248	62	0.0509	62	1	3	6	6
ADRM1	CATCCAGAAGAAAAGCCGCT, CCGCTTATCCGGAGTCACGG, GCTGGTGTACATTCAGCAGA, GCTTGAACTCACAGTCGTCA, GTACTTGGTGGAGTTTCGGG, TGACGACTGTGAGTTCAAGC	6	5773, 588, 514, 2410, 2033, 350	0.1255	63	0.0517	63	1	3	5	6
IRF1	GCATGGCTGGGACATCAACA, GCTGTGGTCATCAGGCAGAG, TCTAGGCCGATACAAAGCAG, TTAATCTGCATCTCTAGCCA, TTAATTCCAACCAAATCCCG, TTATTAATCCAGATGAGCCC	6	516, 126, 4656, 4159, 3016, 1952	0.126	64	0.0521	64	1	2	6	6
AS3MT	ACTGGAATAGACATGACCAA, CTACATTGAGAAGTTGGGAG, GCACAGGGCACTCTACCTTA, TCGGCAGACCTCCAGACCAA, TCGTGACGCTGAGATACAGA, TGAGATACAGAAGGACGTGC	6	1844, 3587, 292, 2515, 523, 1438	0.1277	65	0.0531	65	1	2	6	6
USP21	CCTTCCACATGATATCCGCC, GAAAGGCTCAGAGGACCGGG, GCAGGAGTCAGGGTGCCAGA, GCTCAGGCCGGAGGGCCAAG, GGCCAGGTCTGCCTGATGAA, TCATCAGGCAGACCTGGCCG	6	5514, 533, 6090, 2262, 6087, 64	0.1301	66	0.0548	66	1	2	3	6
ARRB1	ACTCACCCACAGGGTCCACG, AGAAGCCTCTCTGGATAAGG, GAGTATCTCAAAGAGCGGAG, TGAAGTCAAAGCCTTCTGCG, TGGAGGAGAAGATCCACAAG, TGTGCGTCTGGTCATCCGGA	6	1537, 6340, 437, 6914, 538, 3251	0.1313	67	0.0556	67	1	2	4	6
MSC	ACCCGGTCCCCGCCTCCAAG, CGTAGCTGCGCTCTACGCCG, CTCGCCCAGTGACAACTCGT, GCAGAGGAGGAGGACCCCGA, TCTGCCGACGAGTTGTCACT, TCTGGGCACAGCCGGCAGCG	6	554, 3853, 3431, 8078, 58, 752	0.1353	69	0.0584	69	1	3	5	6
RNF17	ACAGAATTAATTCCAATAGA, AGAGTGTTCTGGTCTCACAT, CCTGGTGCACTGGATTTCAG, TAGACAACGCTACTACCCAA, TCAGGGCTAGATCCCATCTG, TGGATTTCAGCGGCACCCCA	6	3073, 5520, 563, 2140, 2341, 356	0.1375	70	0.0598	70	1	2	5	6
JMY	CATAACCTGCCACAACCGGA, GCAGCCTTCTGGGGGACCCG, GCCCAGGCCGAGCTCCGCCG, GCTGCGTCCGACGGGAGCCG, GGAAATGGTGAAGGAGGACG, GGTCTCGGTGAAGAGCACCT	6	6366, 4998, 5, 3250, 882, 569	0.1389	71	0.0606	71	1	3	5	6
AEBP2	AGGCATATGCTGACACACAG, ATACATGTAGATGGTCAGCG, GACCATCTACATGTATGGAA, GGGCCTTGATGTACACACGT, GTAGACAGCACAATTTCCAG, TAGACAGCACAATTTCCAGT	6	4480, 4107, 207, 5421, 575, 5675	0.1404	72	0.0619	72	1	2	4	6
PPARG	CTATAGCCATCAGGTTTGGG, GAGAAGTCAACAGTAGTGAA, GAGCTGATCCCAAAGTTGGT, GCTGACCAAAGCAAAGGCGA, GTCTTCTCAGAATAATAAGG, TTTCCTTTCAGAAATGACCA	6	5904, 969, 2808, 347, 4590, 608	0.1484	74	0.0688	74	1	3	5	6
GOT2	AGTCACTGAAGCCTTTAAGA, CCTGGCTCTGGCAGAGGCCG, CGTTCTGCCTAGCGTCCGCA, GATGCTGGCATGCAGCTACA, GGAACTGGAGCCTTAAGGAT, TGAACAGCAAGCTCACCTTG	6	6308, 609, 905, 999, 2751, 376	0.1487	75	0.0691	75	1	4	5	6
PGR	ACTTGTCAGCAAAGAACTGG, AGTCAGAGTTGTGAGAGCAC, CTTTCATTTGGAACGCCCAC, GTATTCTTGGATGAGCTTAA, GTCTTAATCAACTAGGCGAG, GTTGCTCTCCCACAGCCAGT	6	626, 109, 873, 4066, 5365, 2651	0.1528	78	0.0729	78	1	3	5	6
JADE2	ACCCACCTCAGGAATCCATA, GCTCCCAGCCTGATTGGCCA, GCTGGGCATCGAGTACGACG, GGACTCATACCAGCTCAGCC, GTGCCACCAGAATATGGCCA, TCATCACTACCCACCTCGGA	6	1445, 2487, 317, 3559, 1425, 629	0.1536	79	0.0742	79	1	2	6	6
TLE2	AGTCTCATCCCCATCTCCGA, CAGATGGGTACCTTTCCGCA, CCACCCAAGGACTCACCACG, GAGATTGTGAAGCGTCTGAG, GCACCTTCCACGGACAGCGT, GTACTCACGGCTTTCCCCCA	6	2307, 3122, 246, 630, 3799, 4307	0.1538	80	0.0744	80	1	2	6	6
IL1B	CTACAGCAAGGGCTTCAGGC, CTACCTTCTTCAAAGATGAA, CTTCGACACATGGGATAACG, GCTGGATGCCGCCATCCAGA, TCCGACCACCACTACAGCAA, TTGTGGCCATGGACAAGCTG	6	93, 633, 1549, 839, 2127, 1043	0.1545	81	0.0751	81	1	3	6	6
DNAJC1	AGGATGATGAACGAAGGCAG, ATTTGCTTCCATGCAAACTG, CAACTTCTACCAGTTCCTCG, GATTGCTGATGAAACCACAG, GGAGTTGTTTGACTTAGTGG, TGCTTACCTGCTGCACCCCG	6	6050, 4012, 94, 641, 3453, 4100	0.1565	82	0.0763	82	1	2	5	6
GLOD5	AGGCTGCCAGTCAAGATGTG, CTACGGATAAGACATGGGGG, GATCTTGGAATAAAACATGG, GGAGGGCAGATGGCGCAGCA, TCAAGTCTACGGATAAGACA, TCACGATGTGGTCAAGTCTA	6	2260, 4069, 1799, 644, 495, 4640	0.1572	83	0.0772	83	1	2	6	6
HPDL	AGCCGGGTAGGAAGGGTCCG, CCAAGGTCAGGTGGTCCACG, CGGCAGCTAGCCCTGCGCAG, GATGTGGCACAAACGAAGGG, GCTGACCACGGCGTAAGTGG, GGGTGCCGCCACTTACGCCG	6	1315, 3464, 4631, 4975, 21, 667	0.1628	84	0.0813	84	1	2	6	6
PLOD2	CCAAAAGGCAAACCACAAAG, CCAGAAACCGAGGTAGAAAA, GGTCAAGGAGAAGAATGGAG, GTAGCAACAAAAGAAAGTGA, TCAACCGTATAGTTCAACAA, TCACCTGTGGGGATGCTCGA	6	5321, 470, 668, 1144, 1895, 1410	0.1631	85	0.0814	85	1	2	5	6
MAP3K10	AGTGGGGCACGACCCCCGCG, CATACTCCATCACTAGGCAG, CGCCTCGTAGTCGAACACCG, CTAGTGATGGAGTATGCCCG, CTGCAGCTAGAGGAGATCAT, GGTGCTTTCCCAAGACTGTG	6	5409, 673, 1766, 432, 2673, 5463	0.1643	86	0.0824	86	1	2	4	6
GOT1	AATGTCTTTAAAACCAGCAG, ACAGGCGTGGAGGACAACAA, ACCTCCGTCAGTCTTTGCCG, CCATTCTCCAGCATATCGCA, GCTCACTGCCGACTTCAGGG, TTCACTACTGGCAAAACCCA	6	1396, 2805, 6651, 5295, 693, 396	0.1692	89	0.0877	89	1	2	4	6
SIRT1	ATAGCCTTGTCAGATAAGGA, ATGAATTTGTGACAGAGAGA, GCTGGGCACCTAGGACATCG, GGGAAGACCCAATAACAATG, GTTGACTGTGAAGCTGTACG, TCTGGTTTCATGATAGCAAG	6	4817, 37, 4396, 3735, 3183, 698	0.1704	91	0.0885	91	1	2	6	6
JUP	AGAACAGGACCGACTCCACA, ATACTCACCAGCCTCCACAA, CTACGACTCGGGTATCCACT, GGGTTGTTCTTGTTGAGCAG, GTAGTTGATGAGATGCACAA, TGTCCTCGCCTGACACACCA	6	174, 1009, 699, 6657, 2369, 3700	0.1707	92	0.0889	92	1	2	5	6
CORO2A	CCTCCATCAGAGGCACAGAG, CCTGGTGGAGTGGCACCCCA, GCACATCCCGATGGAACAAC, GGTCCCACAAGGCCACCTGC, GTTCCTTCCTGTAGGCCGTG, TGTGGCATCTTCAGAACAGG	6	3304, 4700, 2080, 721, 1908, 167	0.176	93	0.0927	93	1	2	6	6
HDAC1	ACTCCGACATGTTATCTGGA, CATCCGTCCAGATAACATGT, GCACCATGCAAAGAAGTCCG, GGAAGAGGCCTTCTACACCA, GTAGTAACAGACTTTCCTCC, TGATCCTAGGTATCACCAGA	6	1337, 5105, 271, 722, 6807, 4449	0.1763	94	0.0928	94	1	2	4	6
PRKD1	AGATCCAGACCCAGACCACG, CCACATCAGACTCTGCCCCA, CTGAAAGTCTTCAAAGGTGG, GATGGTGCTGACCCCAGTGA, GCACAGTCATGAAAGAAGGA, GCTGCTGCAGGACTCGTCCG	6	5698, 3722, 394, 725, 3373, 5704	0.177	95	0.0933	95	1	2	4	6
CALCOCO1	GCACTGGGCATGGTGCCTGG, GCTCCAGGATGCGTGCCACA, GCTGATGGAACAGTACAAGG, TAACTTCAGCCACTTCCAGG, TCTCTTCTGTGATCTCCCCA, TGTGTGGTAATCCCGAACAC	6	1940, 6162, 865, 729, 226, 3126	0.178	96	0.0949	96	1	3	5	6
SKOR2	AGGTTGGCGTGCCCTGGCCG, CCGACACGCTGAGCCAGCCG, CGAGATCCACAACCGTCGCG, CGGCATGATCACCAAACGCG, GGAGATCCTGCGGCGTGCCG, TGATGCCCAGTGCCACGCGA	6	738, 4990, 1930, 6000, 5790, 187	0.1802	100	0.097	100	1	2	4	6
UTP3	ACGAAGATGGAGGGAATGCG, AGGAGGCACAGATCATTCAG, AGGCCGGCAGAGTCAACAGG, ATGAGGACGACGAAGATGGA, CCTGAAAGTCAAGTTGACAG, GACTATGGTTCCAAGTCCCG	6	7840, 8739, 741, 5340, 8955, 345	0.1809	101	0.0978	101	1	2	2	6
INO80	AGACAAATCGATATAGGTGG, CAGAAAATGGTCCAACCGGA, CTATCTTCAGTACTTGGAGA, GCTAAGTGATGAATCCAGCG, GTTGGATGAGGAAATGCGGG, GTTTCTCACCAATAGCCGAA	6	2337, 2075, 755, 6846, 4786, 161	0.1843	104	0.1018	104	1	2	5	6
SLC22A8	AGGCCCTGAAGATACTCCGG, CATTGAAGACAGCCACCCGC, CTGCAGCTCACTCAAGATGA, TGCCAAAGCCACACAGGAAG, TGGCAGGTATACTGATTGGA, TTTGGCCAGTTCATTCTGCC	6	6008, 216, 4273, 4773, 1288, 761	0.1858	105	0.1041	105	1	2	5	6
LPIN2	ACTGTGAAGGAACTCTACAA, CCTGAGATCCAAAGAGAAAG, GCTCAGATCAGAGTCTCACA, GCTGCCGGTTTGGATTCTGA, GTGAGCTCCGATGATGACAA, TGAGCTCCGATGATGACAAG	6	762, 402, 1675, 1790, 1946, 4198	0.186	106	0.1042	106	1	2	6	6
CARM1	AAGAAGTACCTGAAGCCCAG, ACCCACCTGGAAGTACTGCA, ATCCAGTTCGCCACACCCAA, GCTGAACACAGACCGCTCCA, GGTGAAGAGTAACAACCTGA, TGGAGCACGGAAAATCTACG	6	2500, 2025, 307, 3957, 763, 1413	0.1863	107	0.1043	107	1	2	6	6
PBXIP1	AGACCTGCAGGAGACCACCG, AGTGGGGGTAGAGGCCCACA, CAGACCCTCCATGTCCACGT, GCAGGTCCTCCCAGACCCCG, GGAGAATGCCCAGCTCCGGG, TTAGAATGCTGCCAGACTGA	6	5367, 3848, 439, 7233, 771, 1136	0.1882	108	0.1067	108	1	2	4	6
MBD6	AATACAGTAGGGGGTCTGCG, ATAGTGGCTGAAGACACTGG, CTAGCAATCGAAATACAGTA, GATGGCTCCGGGAGAGAAAA, GCAGCTCCCCAGTTGTATGA, GCGGGGAGATTATTGCTCGG	6	776, 232, 2279, 4319, 5062, 2241	0.1895	109	0.1079	109	1	2	5	6
PYGO2	ATAGGATTGGGAGGGAAGGG, CCTCCAGTGCTGTAGCCTGG, CTGCGCCGCCCAGCACCGGG, CTTCGGAGCCCCCAAAGTGG, GCTTTCAACATGCCCCCCCA, GGAAAGTTCATGTTGCCTGG	6	5316, 3528, 218, 778, 4577, 1591	0.1899	110	0.1085	110	1	2	5	6
GFI1B	AATGGGGGTGAGTCGGACAG, CTACAAGCCTAGCTTCTCCT, CTATGGCCACAGCTACCGGC, CTTCCTGGTGAAGAGCAAGA, GGAATAGAGTGCTAAGGACA, GTAAGGGCAGGAGGCCAGAG	6	2717, 4074, 3731, 788, 87, 8695	0.1924	112	0.1107	112	1	2	5	6
PSMD9	CGATGTCCGACGAGGAAGCG, GACGAGGAAGCGAGGCAGAG, GAGGAAGCGAGGCAGAGCGG, GCTCTGCCTCGCTTCCTCGT, GGAGCTGATGCGGCGCAAGG, GGGGTTCACGATGTCCGACG	6	1342, 354, 8430, 4458, 3801, 808	0.1973	116	0.1153	116	1	2	5	6
BCO2	ATACTAATGTCAACTATGTG, CATGTGGTGGAAAAACGCAC, CCAAAGCTATGGTAGTAAGA, GCTGCTTCACCAGTTCAGAA, GGGAACCCCAGTGTAATACG, TGAAACCGCGTATTACACTG	6	475, 1164, 810, 3497, 4967, 4260	0.1978	117	0.1154	117	1	2	6	6
AFF2	ACCTTCATCTTGAAGAAGGA, CCTCCAGAAATAATGCACGG, GAGCTTCATGACCCACCAAG, TCTAACCTGGTAGAGCTCAG, TCTTCTTCTCGGGAGCCAAA, TTACCTCCAGAAATAATGCA	6	2475, 6384, 2276, 86, 813, 2019	0.1985	118	0.116	118	1	2	5	6
ING2	ACGTTCCTCTGCATGTCGTG, GCAGCAGCAACTGTACTCGT, GCAGGACTACCTTGAGTGCG, GCTGCTCACCTGCTACGTGC, GGAAAATCGGGCAAGACAAA, GTCGGCCGCGCTCCTGACCG	6	4061, 1590, 77, 817, 3889, 8539	0.1995	119	0.1172	119	1	2	5	6
L3MBTL1	AGATGGGTCAAGGACCCGTA, GACCGAATACGAAGATGGCG, GCTCCACTCCTCACTCTCTG, GCTTATCCGGAACTGGAGCG, GTATAAGCCGCTGAACATGG, GTGCGGGCCTCACCAAGCCG	6	183, 2409, 2552, 5851, 1473, 828	0.2021	121	0.1207	121	1	2	5	6
SRY	ACAGCTTTCAGTGCAAAGGA, AGTTACAGCTTTCAGTGCAA, GAAACGGGAGAAAACAGTAA, GCAAGCAGCTGGGATACCAG, TCAGAGATCAGCAAGCAGCT, TCGTGTGGTCTCGCGATCAG	6	845, 1883, 936, 909, 2174, 209	0.2063	124	0.125	124	1	4	6	6
TFPT	AGGTGCAGAGGATAACTCGG, ATGTGGCCACCAAATAGGGG, GAAGAGGAAGAGGCAGCCCG, GGAGCGAGATGAAGAGGAAG, GGAGGCTGCAGCAGGAACGG, TGAGAACTCCTCAAAGCCCA	6	18, 4800, 7659, 5702, 854, 2314	0.2085	126	0.1276	126	1	2	4	6
MSL3P1	ACAGAGAGTCAGTCGACCAG, GCTGCCTCTTCAGAACTTCA, GGTGCTGTAATGCACCTCAG, TCCACCCTCTTACATTTACG, TGCGCCCCGTAAATGTAAGA, TTACAGCACCAGGAACCCCC	6	2272, 141, 856, 7947, 5933, 5750	0.209	127	0.1282	127	1	2	3	6
TFCP2L1	GCACACAACACATATTGCAG, GCTTCTGCATTCATTCAGGT, GGCGGTCATGGAAGACCACA, GGTTCCTCCTGCTTGAAGAT, GTACTCTGCTCGCAGCCGAA, GTCAGTCTTCTGTTTCCGAT	6	4442, 1681, 404, 6219, 4070, 869	0.2122	130	0.1309	130	1	2	5	6
PRDM8	AGACTTCCACAACCTGGCCA, AGGAAAGAGGAAATTCCCGG, AGTCCCCAAGACGAACAAGG, CCAGCCCAGAGCCTCAGCAG, CCCCAAGACGAACAAGGCGG, GTAGACACCTCAGCAGCAAA	6	872, 222, 5691, 3082, 1658, 962	0.2129	131	0.1316	131	1	3	5	6
PER2	AGACGTGCCCTCCTACACCG, CCAACGAAAACTGCTCCACG, CCACTGCACATGCTCCACAA, CCTGGGGGTCAGCTTCCCCG, GCCCAGCATGAATGGATACG, GTACTTGGAGAGCTGCAATG	6	8144, 887, 2641, 7276, 337, 2288	0.2166	133	0.1357	133	1	2	4	6
C9orf64	CACGAACACCCAGTTGACCG, CCTTCATGAGCTGAACCCCA, GGACGGGCTCCTAAATCCCA, GGTCACTGTCGCGTAGTACG, TATATTCCGAACCTGATCCA, TCATGAGCTGAACCCCAGGG	6	3717, 2725, 889, 485, 1688, 6633	0.217	134	0.136	134	1	2	5	6
CAMK2D	AGATCCTTATGGAAAGCCAG, CATGATAGCATATCAGAAGA, GCTTAGCCATAGAAGTTCAA, GTGTTGGTCTTCATCCCAGA, TATCTTCCCAGAGTTACTGG, TGTTGGTCTTCATCCCAGAA	6	2211, 908, 4959, 4948, 2357, 236	0.2217	136	0.142	136	1	2	6	6
JAZF1	ATTGGAGAAGAAGGAGGCGG, GACAGAGTCAGCGAGAGCTT, GCAGGTATTGGAGAAGAAGG, GGTATTGGAGAAGAAGGAGG, TTAGGGACTCCTGCTCTCGG, TTATTACAGATACAGATCCA	6	7275, 499, 6073, 7174, 924, 1330	0.2256	141	0.146	141	1	2	3	6
ADHFE1	ATATGGAGCAGCAGTTACAA, CCATAGCTACTTGCACAGGA, GATTATGTCAGTGCCCCCAT, GGGGATGCCATTCTTCACTA, GTACGCGACCCGGGCTCGGG, GTCAGTGCCCCCATTGGCAA	6	4009, 5074, 929, 3383, 427, 5251	0.2268	142	0.1471	142	1	2	4	6
ZNF366	AATGAAGATGATCAAAGACG, AGACCTAGATGGGTTCCCCG, CGCTGGGGTAGGCAAAGCCG, CTGCTCCTTCGAAGACCCCG, GATCGATGACAGCTACTACG, GCTGCGGGAACAGCAAAGGG	6	3065, 92, 933, 1077, 3172, 6962	0.2278	144	0.1481	144	1	2	5	6
APPL2	AATCTCATGTGTCAGCCCAG, ACACAACTCACAGCAAAACA, AGTCGGAAAAGAGGTGGCCG, GCTGCAGTACAGAAAGCAAA, GGAGAGGTGCTGCTTCCGCC, GGCACAGTAGTACTGAAGGG	6	1251, 938, 3163, 3055, 6197, 238	0.229	145	0.1498	145	1	2	5	6
EYA1	AGTAATTCCATGACTCCCAA, CCACAGCCAGGACAGCCGTA, CCATATGAGGAAATGCCGTA, GCAGGCATCAAGACTGAAGG, GCTTGGCTGGTGATGCCAGA, GGTAGTAGTGAATCCCCCAG	6	1276, 940, 431, 5684, 4760, 1806	0.2295	146	0.1504	147	1	2	5	6
CCBL1	CCCACCACCAGACTTTGCCG, GCATCTGCAGGTGTTCTCCA, GGCTCGTAGCAGTCAAAAAA, GGGTCCGTTCCCACATGCCA, TCACTGATGAAGTCTACCAG, TGTGTTTGTGTCCCTGAAGC	6	5257, 4741, 31, 942, 3002, 1130	0.23	147	0.1508	148	1	2	5	6
SMARCD2	CATGGGCCCCGCGGGCCCCG, GCAGCATGCCGGGTCCCGCG, GCGATAGTGCAGGAACTGCA, GCTCACCTGGTACTGCGCCG, GGCTTCCTGGGAACTCCGAG, TCACCTGGTACTGCGCCGCG	6	2979, 949, 50, 5971, 4293, 5143	0.2317	148	0.1527	149	1	2	4	6
PHF1	ATTCCAGGTGGACAGTGCTA, CAGAGCGACAGACACAACAG, CTCTCATTACTCACTCCCCA, GAGGAGTTCCTCTCCAGGGA, TCTTGACCCTCCCAAAGCCG, TGTGCCCTCTCCCTCTCCAG	6	2569, 3166, 953, 2439, 102, 7328	0.2327	149	0.154	150	1	2	5	6
PCGF2	CCGACCCCGGAATCATGCAT, CCTGCTCCAAGACCTCGCCG, CTATGCAGCGTACCCCCTGA, GCAGCGTACCCCCTGACGGA, GCCGCTGCTGAGCATCAGGT, TTTCCTTCTGCAGTCCCCAA	6	955, 324, 3820, 6397, 5065, 2541	0.2332	150	0.1544	151	1	2	4	6
CPSF7	GAGCAAATGGCCAGTCCAAA, GCAATTCTGTATACCTACAG, GCTTCATAGGAATACCTCCA, GGAGAAGCTGCCCACATAAA, GTAGGTATACAGAATTGCAG, TTATCCACACGAGCAGATGA	6	1000, 957, 3189, 385, 1326, 2373	0.2336	151	0.155	152	1	3	6	6
NCOA7	AATGCAGAAGAAGTGTCGGA, ATTGCTATATACCTTTCCAT, GTACCTTTGGAGAAGTCCAC, GTATGGTCTCATCTGCCCCA, TCTGACACAGAGCTGCCTGA, TGACTGCACCTGCATTTCCA	6	137, 3256, 963, 3509, 2519, 1611	0.2351	152	0.1569	153	1	2	6	6
HDAC10	ACTCCGCCAGTGACTCCAGG, AGAGTACCTTTCACTGCGCG, GCACATGCCAAGCAGAAACA, GCAGGTTGACAGTGAAGCCG, GGGCAGCTCTCACCTCACCA, GTTCTGTGTGTTCAACAACG	6	965, 4730, 2148, 2138, 1639, 61	0.2356	153	0.1578	154	1	2	6	6
JADE3	AGCTGAGTACCCCCACCACA, CCTTCCATGTATCAGCAAAG, GAGCAGTGAATATACTTCCG, GGTCTCCAGACAGTGAAGAA, TCTCCCACATCCCACCCAGT, TCTTACCTCTGGGATCCACA	6	3378, 978, 242, 1090, 7547, 2496	0.2388	156	0.1608	157	1	2	5	6
SIRT4	ATGCTTTGCACACCAAGGCG, CGTGCTCGAAAGCCTCCATT, GAGACTCCTTGTGATGACTG, GGAGTGCCCCAATCCGCCAG, GGCTGGGGTTTGCGATCCAA, TGCTGGCACAAATAACCCAA	6	3438, 6622, 1087, 983, 496, 3161	0.24	157	0.1614	158	1	2	5	6
SUV420H1	ATAGGGATCAAGAACCAAAC, CACACACTACCTACCTCACA, GATTTAGGCCTATTAAAGGA, GCAAAAATGCAGTCGAGAGG, GGGAGAATCCAAGATCATGG, TTCCTTGGCGGACATTCCAG	6	3929, 2734, 12, 1012, 1861, 7445	0.2471	163	0.1691	164	1	1	5	6
TDRD1	ACTGCACGTAGAAGTCCCCT, AGAAGCGTAAGCCAAAACAG, ATTTCCTTAGTAACTCCAAG, CCAATGTTATCCCAGCAGAA, CCTTGTCCATAAGTAATCCA, GGATATGGCTTGAAACCCAG	6	1088, 2774, 3974, 4415, 1020, 334	0.249	167	0.1716	168	1	1	6	6
PRDM16	AGGAGCAGCGACATGTCGGA, CCGAGAGTCCTCCATCCCAG, GCACAAGCATATCCACAGCA, GCAGCACATGGTCATCCACA, GCTGAGGAGCTCAAGCCCGA, GGGCAGTGAGAAGTTCTGCG	6	7137, 310, 1023, 3399, 2818, 3086	0.2498	168	0.1724	169	1	1	5	6
CITED4	ACGGCGGCCTCTGCACCAGG, CGACCACCTGATGCTCGCCG, CTGCAGGTGCGCGATGCCCG, GCAGAGGCCGCCGTCCGCCG, GCAGAGTCCGGAGCGCATGA, GCTCGCCGAGGGCTACCGCC	6	5457, 343, 5844, 2599, 5764, 1026	0.2505	170	0.1732	171	1	1	3	6
TFEC	ACTCACGGATCATTAGACTT, AGACACTTCAAAGTTAAAAC, AGGAATTTCACCAATTAACA, CATTCTACAGTGATATGCGC, CTTGTAAGCCCCATGTTAAT, GGAATTTCACCAATTAACAT	6	3295, 4734, 1029, 6898, 2041, 19	0.2512	171	0.1737	172	1	1	5	6
SETD8	ACGGAGCGCCATGAAGTCCG, CATCACGAAGTCAAATGCCA, CCGCCGCCGCCTCCACCGCG, GAAGATGTCCAAGCCCCGCG, TGGTTTGGAAAAGGTACCAG, TTTCAGGGCTTGCTTGGCGA	6	4691, 7511, 1031, 2227, 5439, 76	0.2517	173	0.1741	174	1	1	4	6
CITED2	ATGGGCGAGCACATACACTA, CGAGCACATACACTACGGCG, GCTTCCCCGACGGCACCAAT, GGAAATGGCAGACCATATGA, GGAGTTGTTAAACCTGGCCG, GGCAACATGAATGCCACGAG	6	1033, 3331, 7426, 279, 2524, 2257	0.2522	174	0.1745	175	1	1	5	6
PKN1	GCTGAAGGTGAAGCAGGGGG, GCTGCGAGAAGAGCTCGCTG, GCTGCGGCACCACTTCCGAG, GCTGCGGCGGGAAATCCGCA, GCTTAAGCTGGATAACACAG, GCTTCTCCAGGCCCGCCACG	6	1237, 1038, 2251, 2961, 415, 5352	0.2534	175	0.1757	176	1	1	5	6
INO80D	CACACACTATAGCACAAGCA, GAGATTCTGCCCGCTCCAGG, GCATGCAGTGGAACCGTGAA, GCTTTATCCCGAAAAAAGAG, TTGGCCTTGAAGATGCCCAA, TTGGGGCTATATGAGCACAA	6	1040, 4720, 192, 3579, 3843, 4599	0.2539	176	0.1763	177	1	1	6	6
ZNF473	CCCACACTCCTGACACTCAG, GCACTGGATCACTCATACTA, GCAGGATTCTGTTCAGGAAG, GCTAAGTCTAAGGAATATAG, GGTCTGATATTGCCACCAAC, GTGTATCCGAAAACTCACAC	6	3638, 2556, 3088, 1049, 6044, 284	0.2561	178	0.1791	179	1	1	5	6
SETD9	ACTGGCAGTTGAACATCAAG, ATTCCTCTGGAACATATCGG, CTTAGGTTCAGTGCGATCCA, CTTGATGTTCAACTGCCAGT, GTGCGATCCAGGGAACGAAG, TGAACCTAAGCCACAACCCG	6	489, 5154, 1050, 1058, 3526, 4122	0.2563	179	0.1795	180	1	1	5	6
NACC2	GCAGCTCGTGGTCATGTACA, GCCCCGTGTCTCCTACTACG, GCCGGCGTCCTCGATCACAG, GCTCACCTTGAACATGAGGT, TACTTCCGCGACCTGTTCAG, TGTTGCCGCTGAACAGGTCG	6	1057, 2118, 1835, 3032, 5378, 118	0.2581	181	0.1811	182	1	1	5	6
H1FOO	GCACCATGCGTAGCACCGGG, GCTTACTTTGAAGCTGCCAG, GCTTCAGCAGGTACTTGAAG, GGTGGCGGCGTCCCACCGGG, GGTGGGACGCCGCCACCCCC, GTACCTGCTGAAGCAGGCGC	6	6, 3891, 6736, 2413, 1074, 6071	0.2622	184	0.1845	185	1	1	4	6
LMCD1	ACTTGGAGTCCATCAGCAAG, CATCTGACCTAGAAGACGAT, CTAGGTCAGATGTTAGGCAG, GATCTTTCCCAGTAGCAATA, GCTGCAGTCAGCAAGAGGTG, GCTTCGAGCCACATTCATGG	6	5000, 2619, 294, 1076, 7244, 5335	0.2627	185	0.1848	186	1	1	4	6
MBD3L1	AGCCAGGCTTTGATTTGCAT, GGTCAGATACCATCAATGGG, GTGTAACTGGACATTCTCAA, TGATGGCCAAGAGTTCACAG, TGGTATCTGACCTCATTGCC, TGTCCAGTTACACATTCAAG	6	2300, 6241, 3492, 1150, 367, 1147	0.28	201	0.2054	201	1	1	5	6
TAF9	AATTGTGGTCACATATCGGA, AGGTAAAAGACTGATCAGCG, CTAGAATTGTGGTCACATAT, GATGATGGCACAAATCCTGA, GCATCTTTCGGCATGCTCTT, TATCATGGAGTCTGGCAAGA	6	2813, 6301, 445, 5848, 1152, 3870	0.2812	202	0.2068	202	1	1	4	6
MAPKAPK2	ACGAGAATCTGTACGCAGGG, ATTCAATCAACATTGCCCAT, GATGCTTCAGGACTGCCCCA, GGACTGCCCCAAGGCCCGCA, TCCGAAATCATGAAGAGCAT, TTTGAGGGCGAATTTCTCCT	6	1153, 2787, 304, 2794, 4848, 6812	0.2815	203	0.207	203	1	1	5	6
GLO1	CCTCAGTTGCTGCTCCGACG, CGACGCGGACCCCAGTACCA, CTTGGTACTGGGGTCCGCGT, GCAGAACCGCAGCCCCCGTC, GTCGGAGCAGCAACTGAGGG, TCGTCCGTGAGGCCGCCGGA	6	4286, 1173, 5772, 1923, 2444, 132	0.2864	209	0.2126	209	1	1	5	6
GFPT2	ACATGAACTACAGAGTCCCC, AGAAGCAAAGAAGAATTCCA, CAGCGCTCAGACAAAGGCAA, GGTGGCTGTTGACAGCACTG, TCACAGGTGTGGCGATCGAT, TGAAGAATATCTGTAAGACA	6	1186, 5765, 278, 7498, 1538, 5708	0.2896	211	0.2176	211	1	1	3	6
TAF4B	ACTTGTACTGAGGAAGGCTT, GCCCCTCCTAAAGTCAGCAG, GCCGCTGCTGACTTTAGGAG, GCCGGCCTCACCGAACCCGC, GGCCATGGTCACGGTCCCCG, TCTGCATTTCCAGAAAAGCG	6	248, 3934, 7639, 1190, 4383, 5011	0.2905	213	0.2184	213	1	1	4	6
SMC5	ACAGGCAACAGATATTAAGG, CTGCAACAGCGGCAGCTGCG, CTGTGAACTCAAAAACTTAA, GCAAAATGAACTAAAGACCA, GGAAGTTCTCCATCGAGATG, TTTATTTCTCTCATACCTGA	6	8490, 7448, 1207, 7817, 8823, 202	0.2947	218	0.2229	218	1	1	2	6
MXD1	ACAGAGATGCCTTAAAACGG, CCCCCGGTGCAGAATGGCGG, CGACTTGATTCGGGTCCAAG, CTCCCGCCGCTCCAGATAGT, GTTATTGTATGGTAACATGG, TTGTGCCTGGAGAAGTTGAA	6	4937, 1208, 1444, 1633, 4379, 374	0.2949	219	0.2233	219	1	1	6	6
TCEA1	GATGGTGCAGAAGAAGAACG, GCCTTGCAGTCCACAAGAAT, GCGTATTTCAGTACTTCCAG, GCTGCAGCTCTTCGAACAGG, TACATCGCAGAACAGCCCTG, TCGCAAGCAGAGTACAGATG	6	159, 5088, 5677, 1211, 4030, 6890	0.2957	221	0.2246	221	1	1	3	6
RBP2	ACGTACTGCAATCTTGCGGG, AGTGGCCACCACCATGACAA, ATAGTTGCGGAATGTGCTAG, ATTCTGGTCCCTTGTCATGG, GAGAGTAATGAAAACTTTGA, TGAAATCCACATCATAGTTG	6	5792, 28, 1212, 3379, 4701, 3405	0.2959	222	0.2248	222	1	1	5	6
ALDH1B1	AGAAATGCTGGCCATCCATG, CAGCAAGAAGACCTTCCCGA, GATGAGGGAGGCCAAATACA, GCTCCACTAGGTCTGCCAGG, GGGTGGTGAACATCATCACG, TGATGATGTTCACCACCCCA	6	1215, 3677, 3522, 234, 2509, 5225	0.2966	223	0.226	223	1	1	5	6
MED13	ATTGGTTTAGAAGGAACCAA, CCTTGGAGTTGGAAACCGAG, CTTCATCAACCACATCACAA, GCAGGTCCACCAGCTCCACG, GCTATTAGACTGTTGAGCAA, GCTGCAGTAGAAGTTCTTGT	6	3150, 33, 3533, 1230, 5622, 2045	0.3003	225	0.23	225	1	1	5	6
PARP9	CTATCCGGGTTAGTTTGCAA, GCATGGATGATCTGTTTGCA, GTGGCCCTGGACAATCTGGA, TGGATGGAATGGGATAAACA, TTATCCCATTCCATCCACCG, TTCCTGAACTGGAGAGACCA	6	4105, 1870, 414, 2660, 3741, 1238	0.3022	226	0.2323	226	1	1	6	6
PHF20L1	CCATGCCCGAGGATGCTAAG, CTTAGTGCTGGTCTCTCAAG, GACCAGCACTAAGAAAAGAA, GCACATTAAAGCCATGCCCG, GGAGTCATCGTTATGATGAG, TCTTAGTGCTGGTCTCTCAA	6	2727, 2024, 3961, 42, 1243, 2806	0.3035	227	0.2331	227	1	1	6	6
ACTR5	CATGCAGAATCTCCTCCATG, CTGAGGAGAAACAAGAAAGG, GCCGCGCCTGCAGTTCCGCG, GTACCGCTGGTGCTGGACAA, TCATTTGCCGTGAATACAGT, TGAGTGCTACGGGATTCCCA	6	1310, 397, 4216, 4842, 1650, 5315	0.3198	242	0.253	242	1	1	5	6
PHF13	AATACTCCCCCAGTTGCAAG, CAGCTTCACTCACCTCCGGG, CCTGCTGGACAGAAAGAAAA, CTACATCCCTTATCCGAAGG, GCTGCAGGTGGCTAAAGCAG, GCTGGTACCATTGACAGCGA	6	2120, 7295, 1311, 4683, 5372, 136	0.3201	243	0.2534	243	1	1	4	6
FKBP6	AGAAGGAGCTGGAGACCTAG, GAGGATGCTGGACATCTCGG, GGGGGAAGCGCGTTAAACCA, TCTGGGCCCTCACCTGGCCG, TGACGTCCTTCAGCACGCCC, TGTACGAGCGGTTAAGTCAG	6	4780, 6152, 1314, 319, 1630, 6109	0.3208	244	0.2545	244	1	1	4	6
RBL2	AGCAGCGAGGAAGGAAACAG, ATAAATGGAAAATTCCCAGG, CCACCCCTCAGATCCAGCAG, GAGCAACCTCGTCAGCAGCG, GTACGTTCTCTGAAATGTGG, TAGAAACTGGAGTCACACAA	6	270, 2935, 3775, 5604, 1975, 1333	0.3254	249	0.2602	249	1	1	5	6
VPRBP	AGAACACTCCATTAACCACA, GACGACGAAGACCATCATAG, GGTCCTCTCACCTTGTACGG, GTTGCAGCCATAGAAGGACG, TATTCTACTGGACTGTTAGG, TGTAGTGGATGGAGACCAAG	6	5245, 6982, 7446, 1335, 381, 3636	0.3259	250	0.2608	250	1	1	3	6
TET3	ACACCCCTCCAGCAACGCCC, ACATCCAGTCAGTATTCAAG, GGAATGAGAAGGCTGCGGGA, GGGGTTCCCATACTTCCGGA, TTAGCTGCCGTGAGTCCCCA, TTTCATACCATGCCGCGCGA	6	3512, 4849, 4028, 1341, 420, 4008	0.3274	251	0.2626	251	1	1	6	6
TCEAL1	AGGAAAGAACTCCTCCTCCG, GAGGAGCGCCCTCCGCAGGA, GCGGAGGGCGCTCCTCCGAG, GGAGGAGGAGTTCTTTCCTG, TCCAGGAAGGACCTGTTTGA, TCCCGAAAAGCAGTCCCCCG	6	2291, 4109, 1713, 139, 4089, 1347	0.3289	254	0.2643	254	1	1	6	6
ANP32E	ATAATTGCCTGTGTGTCAAT, GAGTCATCTCACCTCCTCCG, GATGAAGAAGAAGATTAACC, GGAGTTAAGGAACAGATCCC, GTTAAGGAACAGATCCCCGG, TTTCGAAGTTTATTTAAGCT	6	3781, 1361, 2177, 4970, 6701, 425	0.3323	261	0.268	261	1	1	5	6
FLT1	CTAAGTAATTTGACTGGGCG, GGTCAGCTACTGGGACACCG, GGTGTCCCAGTAGCTGACCA, TCAGGGATCAAAGTGTCAAG, TGGTGAGTAAGGAAAGCGAA, TTAGGTGACGTAACCCGGCA	6	3023, 1365, 6051, 205, 4252, 4568	0.3333	262	0.2689	262	1	1	5	6
EYA2	ACTGGCTCTGGGGGAAGCCG, CCATACACCTACCAGATGCA, GCCAGACGCAGTACAGTGCG, GTACAGTGCGGGGATCCAGC, TCCTTCCCACAGGCACAACA, TGAGGAATCCACTCTGGCCA	6	1969, 481, 1368, 3030, 2197, 2087	0.334	264	0.2702	264	1	1	6	6
UBE2A	ACATGTCCACCCCGGCTCGG, CATGAGGCGCCGCCGAGCCG, TCCTCCAGCCGGAGTCAGCG, TCTCTTACCATCCTCAAACG, TTGCAGGAGGATCCTCCAGC, TTGTTCTTAGTCTATGCAGA	6	7779, 6509, 1371, 60, 4735, 5793	0.3347	265	0.2714	265	1	1	3	6
UPF3B	AAGAAAAGAGAGAAGAAAGG, ATTACCTCCCACTTTGACCA, CATCAACTTTAAAAACCAAG, GAGCTTCCTGAAAAACAAGC, GCTGCCTGTGGCCCCGGCGG, GTAACCCTGTTAACCCCCGC	6	8753, 1375, 3896, 391, 8443, 1782	0.3357	267	0.2727	267	1	1	4	6
DDB2	CGTGTTAGATTGGAGCTGGA, CTGTGGCTGTGGGTTCCAAA, GATGTAGCCCTCCTGTCAAA, GGAGGGCTACATCCTTGGCG, GGGGCGTAATACAATCTCGG, TATTACGCCCCAGGAACAAG	6	3252, 418, 4900, 1382, 4380, 2278	0.3374	270	0.2745	270	1	1	6	6
HPD	AGATGGTGTCCGCCTCCGAA, CATCTTCTCTGCAGAAAGCA, GCCAAGGTCTCACCATTCGG, GGCGATCACCTGGTGAAACA, GTAGTTCATCTTCTCCACCA, TCAGCCATGTAATCAAACAA	6	2330, 479, 2498, 6275, 6048, 1388	0.3389	273	0.2775	273	1	1	4	6
HDAC6	AGCGGGCTGCCACAGCCACG, CTATTGCATGTTCAACCACG, GCTAGATTGGGGATAGAGCG, GCTGCTTCCCAGGTTCTGAA, GTAGATTGGGATGTGCACCA, TGAACTGTGTTCCTTGACCG	6	4162, 474, 1395, 4936, 4933, 3035	0.3406	274	0.2795	274	1	1	6	6
NAP1L2	CCCTTCTTCCCCAAGCCCAG, CGATACTGATGAGGACTCAG, CTATTATTATGATTATGCTG, GGCCGAGTCAGAGAACCGCA, GTCAGAATCCAGTCAAGAAG, TTTAGAATCCAAATTCCTGA	6	1663, 5159, 2461, 4361, 275, 1409	0.344	277	0.2841	277	1	1	5	6
NCOA2	AGTCAGATGTATCCTCTACA, GCAGACTGCATGACAGCAAA, GCAGTCCTGCTTGATTTGCG, GCTGTCCTGGATTCATGCCA, GCTTCACCAGACCTAAAAAT, TTACCTGATTCAGAAGAGGA	6	5508, 491, 5839, 3927, 4669, 1429	0.3489	281	0.2909	281	1	1	4	6
NOTCH2	AACCCTTCAGACACTCACAG, AAGTGTATCGATCACCCGAA, ACTGCCCATTGTTCACACAA, CCGACTGCAGAGATTCACCA, GCAGCGCCCACAGCAGAGCG, TTTCCGCTGTATATGCCCCG	6	4570, 2828, 185, 4261, 4443, 1433	0.3499	282	0.2925	282	1	1	6	6
SLC22A20	AGACAGCCACCCACAAGCCA, GCAAACTGCAGGCACCGCCA, GCAGTCCGTCTACATGGCCG, GCCCACGTAAATCATGGTGG, TGGCAGGCCAGCAGGCCGCA, TGGTGGACGGGAAAACACTG	6	7712, 5725, 406, 4695, 5478, 1434	0.3501	283	0.2926	283	1	1	3	6
TRIM16	ACAGCGACTCTGCAGAGCAG, CCACGTCCTCTTCTTCCACT, CTCCCTGCCAAGCTTCTCCG, GCACCCAGTTAGACTTGGAG, GTCGGTGTCAGAGGTCAAAG, TTCTGGGTCAGCCAGCCCAG	6	4238, 1467, 433, 6664, 1456, 6128	0.3555	289	0.2984	289	1	1	4	6
KDM7A	AATACCCCAATCTTACCCAG, CATCTAGTACTTACTCAAGG, GATCGAGTGCGATATCTGCA, GCACACACAGTACACGGGCG, TAGATGTCATTGATGTGGCG, TTTAAAGATGGCCGGAGCGG	6	1457, 1665, 3423, 320, 2695, 6143	0.3557	290	0.2986	290	1	1	5	6
CTBP1	AATCCGGACGATGATGCGGA, CCACGCCATCCGACAAGTAA, GAGCGTCGAGCAGATCCGCG, GGATGGCCGGGACTGCACAG, TGACAACATCGACATCAAGT, TGATGCCCAAGGTCTCCCCG	6	3641, 2325, 7052, 8126, 1466, 389	0.3579	294	0.3014	294	1	1	4	6
SIRT7	CACAGGCGCGGGAATCAGCA, GACCTGGTAACGGAGCTGCA, GAGCCGCTCCGAGCGCAAAG, GCAGGTGTGCGACGACCCGG, GCGCATCCTGAGGAAGGCGG, GCGTCTATCCCAGACTACCG	6	4508, 3329, 365, 1493, 7566, 6391	0.3645	299	0.3098	299	1	1	4	6
OGT	AGCCATAGCTTCTTACCGCA, GCAAGTGTACTGCAGCAGCA, GCACATCGAGAATATCAGGC, GCTGTCGGCCACGTTGCCCA, GCTTAAGTTTCAGAGCCGTG, GGAATGTGTACAAGGAAAGA	6	8071, 1496, 2784, 325, 6134, 8094	0.3652	300	0.3114	300	1	1	3	6
ATAD2	AGAGTCTTTCCAGTTCCAGG, CGCGGCGCAGAAGAAACCCG, CTATAGATCCTGCTTTACGA, GATTCTAAAGATTCACACCA, GGACAGGTCCAAGGAGCCCG, GGAGCTGCACAACCACTCCG	6	3428, 3976, 1498, 2453, 4203, 172	0.3657	301	0.3116	301	1	1	6	6
TET1	ACAAAGTTCATGCAACACGG, AGTGCTTTACTCCCAAAGCA, CCTGATATAGAGACTCTAAT, GGAAAACAAGAGGCCCCAGA, GGTCCTAGCAAATCAGACAG, TCATGTTGTCAACACCACAG	6	6495, 4139, 1501, 2863, 163, 6629	0.3665	304	0.3123	304	1	1	4	6
PARP15	AATAACATCTACCTGTTCAG, ACAGCATATGAAATGAAAAT, ATAATAATTCATGTTCCTGG, CCTTGGGTATCTCCTGCCAT, GTAATTATAAAATCTCTGTG, TGAACAGAGGAAGTACACAT	6	2841, 403, 2600, 1506, 2234, 2422	0.3677	305	0.3139	305	1	1	6	6
DACH1	CCGAAGCGATGGGCTCCGGG, GCCACAGTCACCTCTACCGG, GGAACAAGTTCGCATCCTGA, GTACTCAACCCCGTCCCCAG, TTGAGTACACGGGTTTCCCG, TTTGCACTCATTATTCTGAG	6	4549, 4533, 1511, 5264, 383, 4776	0.3689	306	0.3151	306	1	1	5	6
SP140	ACTTACTTCATACATCTGCT, CAGCAATCTCAACTTCAGGT, GCAGAGATCCAGAACGTAGA, GCCAAGCTCATGGCCCAGCA, GTTCTTCAGAGAAAACAAGG, TGGCCCAGCAGGGCCAGCAG	6	3960, 5624, 465, 1516, 2401, 3178	0.3701	309	0.3163	309	1	1	5	6
HSPBAP1	ACACACTAGATTCTTCATAA, AGGAAAGGAGTATCTTCAGG, GACCACTCCTGTGATCGTTG, GGACTCCTATGGTTGTAACT, GGGATGAAAAGCATGAGCAC, TTACATGTAGTTTCAAACTG	6	4135, 4044, 322, 3283, 3307, 1527	0.3728	312	0.3189	312	1	1	6	6
NFYB	AATGATCATGAAGACACAAA, ACAACAGATGCTTCTCAACT, ATATCTTCCAATAGCAAACG, ATCTCTGCAGACTATATTGG, GTGGCTTGCTTACCATCATG, TATGTTATACAGCCTCATGA	6	2597, 4703, 2085, 1533, 393, 3396	0.3743	315	0.3204	315	1	1	6	6
HES5	CGGCGCATCTTCTCCACCAC, GCACCAGCCCAACTCCAAGC, GCAGCTGCGGAAGCCGGTGG, GCCCAACTCCAAGCTGGAGA, TGCTGGAGCAGGAGTTCGCG, TTTGGGGCTGAGCAGCTCCA	6	6046, 3225, 6769, 3940, 1541, 196	0.3762	318	0.3229	318	1	1	4	6
BRCC3	AATGGGGCTGTGCATAGGGG, ACCTTGACAGACACACAGGT, CCTTCTCTGTGCTCAGAGCG, GAGCGTGGTTGAGACAAACG, GCTCTGGAGAAATTTCTACT, GCTGTCTGCAGCTTCAACAG	6	3357, 5338, 6784, 2895, 450, 1542	0.3765	319	0.3232	319	1	1	4	6
TRAF7	GCACCCTTGCCTACTCCCCG, GCTACAACCGCTTCTCCGGG, GCTGTCCTCCTCGTCCCGCG, GGACAACGTCAAACTGACCG, GGTGGTGAACAACATCGCGG, TCTCCCAGAGAAGTGTCCCG	6	5697, 67, 2925, 1544, 7909, 8722	0.377	320	0.3238	320	1	1	3	6
FGF2	ATTAGCGGACGCGGTGCCCG, CCCGAGCCGCTGGAGCCGCG, CGGACAGAAGAGCGGCCGAG, GCCTCCCGCCCGGCAGCGCG, GGGGACGGCGGCTCCCCGCG, GGGGCCGGCGGACAGAAGAG	6	197, 3719, 5864, 6928, 1554, 5430	0.3794	325	0.3274	325	1	1	3	6
ADO	CGATGTTCAAGTCCTCGGCG, CGGCGCTTCCGATCGCGACG, CGTCGCGATCGGAAGCGCCG, CTACATGCACATCTACGAGA, GGAAGGTGAGGCAAGCCTGG, GGCGTGTTCCTGCTCAAGAG	6	6183, 1564, 6138, 2671, 442, 3979	0.3818	329	0.3298	329	1	1	4	6
MAP3K7	AGGGGCTTCGATCATCTCAC, GCAGCAGTATAATATGGCAA, GCTTACTGCTGGTTGCAGGG, GGGCCACCAATCTCATCAAA, GTAAACACCAACTCATTGCG, TTTGGGAAGTGATAACGCGT	6	82, 4358, 4323, 2236, 1606, 2490	0.3921	336	0.3422	336	1	1	6	6
H2BFS	ACTAAGGCGCAGAAGAAGGA, AGGCGCAGAAGAAGGACGGC, ATACGGAGTAGCTCTCCTTG, CTTCGAGCCCTTCTTGGGCG, GCTTTCTTCGAGCCCTTCTT, GTAGTTCGCCTTCAACATGC	6	8504, 424, 8662, 2952, 2029, 1624	0.3965	340	0.3484	340	1	1	4	6
RCOR2	AGTGATGGAGAAGCCGAGCG, CCTGGTAATTGGTTCCAACG, CTCGGAGGATGACAGCAGCG, GCTTGGCATCTGACACACAG, GGGCGACGCCGGGTTCGCAA, TGATGGACAGACAGGCCCGG	6	105, 5701, 1736, 1656, 5746, 6966	0.4043	346	0.3578	346	1	1	3	6
ATXN7	AGGTTGGCTTTGGTATTGAG, CAGCAAAGTAGAGTTCCCCA, CGAGCACAAAAACAAAACCA, GCCTCAGAAAACTTACCCAG, TCACCTGGACAGATTCTGAA, TCTCTGTCCAAAAGCAAAGG	6	4954, 4027, 2710, 3300, 1696, 9	0.4141	356	0.3706	356	1	1	6	6
INSM1	CGCCGCTCTACAGTCCCACG, CGCTTCACCAGGAAGCCGCG, CGTGGGACTGTAGAGCGGCG, GCTGCTCTCGCCCAGCTGCG, GCTGGCGCCGAGGCGGCCCG, GGCCGCGCCAACATGCCCCG	6	1697, 3190, 1727, 6557, 3543, 300	0.4143	357	0.371	357	1	1	5	6
RCOR3	ACACAGATAAAGACAATGGA, AGAAAGGGCCCGAGTTACTG, AGCAGCGACGACGAGCACGG, GCAATTGCAAAGGAAAAGCA, GCAGATGTTGGGATGAGAGT, GTTACTGGGGAAGAACCGAT	6	1745, 6304, 7483, 407, 6299, 4481	0.426	370	0.3851	371	1	1	3	6
SAP30L	CAACGCCTCCTTCAGCAAGA, CCAGAGCTGCTGCCTCATCG, GCAGCTCTGGCCGTAGCCCG, GCCCGGGGCGGGGAGATGAA, GCTGAAGGAGGCGTTGCCCG, GGAGATGAACGGCTTCAGCA	6	1749, 24, 2889, 6640, 2115, 5878	0.427	371	0.3865	372	1	1	4	6
GPT2	ACAAGCCTGCAGGATCCGCC, AGAGCACCTTAGGATCACAG, ATGCTAAGAAACGTGCCCGG, GCAGACCTGTGGGGTTCCCA, GGCTGCCTACATCACCAGGA, GGTGAATTACTACCTGGACG	6	3895, 7411, 488, 5600, 1753, 5674	0.428	372	0.3882	373	1	1	3	6
TSPYL2	GCAGAGAGAGAAATGCCGAG, GCAGCGCCCGAGGCTCCAGG, GGAAAATGTCTTCATCACGT, GGGATTCTACCATCGAGTCG, GGGTTGAGTGAGACACCAGC, GGTACTGCCACTTACCTGAG	6	4357, 5866, 2205, 250, 1781, 4973	0.4348	382	0.3967	382	1	1	5	6
GLS2	AGGAATCCCCCATAACCCCA, CATGAGCGAGATGCACCGCG, GCACCACCTCAGTGAGGCCG, GGTTTGACTTGGCCAGCTGA, TACTGGACTCTTGGACCACG, TTTGTGGGCAAAGAGCCAAG	6	1783, 2007, 98, 4971, 3279, 2694	0.4353	383	0.397	383	1	1	6	6
SIRT3	CGTTGGGCTTGTAGTTTCCA, GCCGGCATCAGCACACCCAG, GTACGATCTCCCGTACCCCG, TCCTTGGCCAAAGTGAAAAA, TCTCTCCCTGCAGATCGCCG, TCTGCCAAAGACCCTTCCCA	6	4363, 6843, 1960, 1809, 124, 4578	0.4417	389	0.4056	389	1	1	5	6
NEUROG1	ACGACGAGCAGGAGAGGCGG, AGACTGTGCCAGACTCCAAC, CCGCATGCACAACTTGAACG, CGGAGATGCAGGTCTCAAGG, GCTGCTGGCGCAGTCGAGGT, TCTGGCACAGTCTTCCTCGT	6	2289, 430, 4059, 3550, 1814, 6406	0.4429	390	0.4067	390	1	1	5	6
JARID2	ACTGGAAGAGGCACACCAGG, CGAACTTCTCCACCTGAGCG, GCAAGCTCAACGATGAGATG, GCTGGGGCCCCAACGTGCAG, TAGCTGAAGCCTGCTCCCGG, TGAGATTGTGTGGTTGACAG	6	3451, 5250, 27, 4446, 1826, 4219	0.4458	392	0.4114	392	1	1	5	6
NCOA1	ACCTCCTGAAGAGTTAGCAG, AGAGATACTAGGATTGACCG, GAGATACTAGGATTGACCGA, GCCACCATCCAACAGCAACA, GTATTGCACGGCGATTACCT, TTCACCCTCCAGATGAGCCA	6	228, 1944, 5394, 1829, 2798, 6171	0.4465	394	0.4122	394	1	1	4	6
EGLN2	ACGAAGACCCTGGTAACTGA, ACTGCCAGCCCTCTTCGGGA, CGTCAAGGACAGCTTCCTGG, GCAGCGCCTTCACTCTGCAG, GCAGGGCACGATATAGTCCA, GGCCAGGCAAGAGAACCAGG	6	6900, 3661, 8053, 1832, 10, 6638	0.4473	395	0.4133	395	1	1	3	6
TAT	CATGCACGTCCAGAATTGAG, GCACGTCCAGAATTGAGGGG, GCAGGTTTCCAAACACAGTA, TCATGTTGTCCACAATGGCT, TGAAAGGCAGAAAGGCCAGG, TTTCAGGCTTCCTATCCAGT	6	2685, 1840, 286, 3467, 5332, 5545	0.4492	398	0.4159	398	1	1	4	6
TICRR	GCTCGCGGAAGTCAGACACG, GTGAACCTCATCTTTCTCCG, GTTGGCAGCATTGAAATCCA, TCAAAGAGATCACTAAAGCG, TCTGTCTCACTGGAGTACGA, TTATTTGCTTACCTTCAACA	6	1856, 121, 7668, 6814, 2646, 7200	0.4531	401	0.4205	401	1	1	3	6
ALKBH2	ACAGCTGGCTCTTCTCCAGT, ACTCAGCAGGCCCTAGCTGG, AGTCCTGTTTGGCAAAGCTG, GAGGAGACAAAGAAAGCACA, GGCCCAGGAGAGAGGCCCCA, TGAGTGGCCTCCATTCCCTG	6	4215, 288, 1860, 5279, 3171, 1947	0.4541	403	0.4212	403	1	1	5	6
RBFOX2	ACGGAAGTACGCAAGCCCAC, AGAGACATGCAGCCGTTTCG, ATTGCGTCAGGAGTTGTTGT, GAAGGTGGAGCACAGACAGA, GTTGCTGCTCTGCTCCCCGT, GTTTATGGAGAAAAAGAAAA	6	5067, 7075, 1864, 2748, 4857, 49	0.4551	404	0.4224	404	1	1	4	6
NAA40	ACACTGGGAAAGCCTCCAGA, AGCCTGGTACCTCATCGCGT, CCAAGGAGAAGAAGCAGAAG, GAAGGACCGAGAGAAACGGG, GAGAAAGTCAAGCAAAGCCA, GAGCCTGGTACCTCATCGCG	6	247, 5009, 4479, 8029, 1872, 7908	0.457	406	0.4246	406	1	1	3	6
TDO2	CCTGAAGTCATTGAAGTCCA, CGACTATTAGAAAACAAGAT, CTTCTTCGCTGCCTTCTACG, GAACAGAATCCAACTCCCAG, GTTCGAGAGATCTTTCAGAA, GTTTCAGGATCACTGACACT	6	3816, 5056, 1922, 2131, 262, 6732	0.4692	420	0.4394	420	1	1	4	6
PCBD1	ACAGGCTGAGCGCTGAGGAG, CACTCTTGTCATGAACCCAA, CATTCCACCCCACAGCCCTC, CCAGCTGCTGCCAAACCTGA, TCATTTCAAAGACTTCAACA, TCTAGGCTGGCAAAGCACAC	6	7434, 2298, 2997, 326, 2442, 1925	0.47	422	0.4404	422	1	1	5	6
RFXAP	ACAGGGTTGCATCACTAGCA, CAGCGGCGTGCCCCACCCCG, GACACTTCGGACCCTCCGGG, GCCTCGTCCTGCCCAGCACA, GGACGAGGAGACTCACTCGG, GTACCTGTGCGAAGGGGCCG	6	4308, 4871, 1933, 4110, 3778, 11	0.4719	428	0.4422	429	1	1	6	6
HIF3A	AAGAGTACACTCACCAGCCG, GCAAGGGCCAGGCAGTAACA, GCGCACCCTCAACCTCAAGG, GGCCCCACGCACCTTCCAGG, GTGTTGCTCCGTTTGCTCCA, TCTCGCAGACCCATTCAGCG	6	4406, 220, 6153, 2987, 4196, 1965	0.4797	434	0.4495	435	1	1	5	6
PRDM5	AAGTCCTCCCGGGTTCAGGA, ACACAAACCTGGCATCCCCC, ATTGCACCAGAAACCCACAG, CATGCCGTCCTGAACCCGGG, GCACCAGGAGACTTGCCGGG, GGATGCCCTGAAAAGACACC	6	295, 2497, 5232, 4205, 1973, 5489	0.4817	435	0.452	436	1	1	4	6
JMJD7-PLA2G4B	ACATCCAGCACGAAGCTCAG, AGAGCGTTGCGGATAATGCA, GAGCCACTCACCCCTTGCAG, GGGGAGGGACCACTTCTGGA, TCTGCACATAGAGGACTCCA	5	182, 2937, 2389, 3363, 3535	0.5026	451	0.4649	449	1	1	5	5
TRIM33	CTATCTGTCTGCATTCTTGG, CTCCTCCTCCACCAGCACCG, GCTTGGGCTCCGCCTCACGC, GGCGGAGCCGCCTCTCACCG, GTATTGCTCCATTAGCAGCA, GTTCAAAGAGGAAAACATGG	6	2044, 3435, 6942, 7104, 6188, 200	0.499	449	0.4738	451	1	1	3	6
SETDB1	ATACCGGGACAGTAGCTCTG, GCATCCAAACCAATGCACCC, GCTAGCAGAGTTAGAGACAT, GGATGCAGCAACAGCTACAG, GGTAATACAGAAAGAATCTG, GTATCTCTATGGAGGAACTT	6	2076, 2107, 7967, 453, 4711, 4603	0.5068	457	0.4827	458	1	1	5	6
SYCP3	AATATGCTGGAAGGAGTTGG, CTGCAGTCATTGAGAAACGT, GAAAGATCTGAGTGGATCAG, GAAGATAAGAAAGATCTGAG, GCAGGAGTAGTTGAAGATAT, GTAAACTGATCTTCCACAGA	6	2555, 44, 2078, 2247, 4325, 2543	0.5073	458	0.4834	459	1	1	6	6
CBX3	AAAATGGGAAAAAAACAGAA, AAAGCTGGCAAAGAAAAAGA, ACACAGTGCTGACAATACTT, ACGTGTAGTGAATGGGAAAG, AGAGCCTGAAGAATTTGTCG, GGCCTCCAACAAAACTACAT	6	30, 2084, 6608, 5060, 2920, 2602	0.5088	461	0.4846	462	1	1	4	6
AADAT	CAGAAGACATGAATTACGCA, CATCTCTTCTCCAAATTGGA, GCTCAACAGCTGCACCCACT, GTAGCTGACATATTGAGCAG, TTAATAATGTTGCAGCCCAG, TTTCTCACTCATGGTCCGGA	6	2625, 2101, 5524, 369, 5337, 2946	0.5129	467	0.4896	468	1	1	4	6
ALDH9A1	AGGCGTCCGCCGGCTCCACG, GCCCCGCCGCGGTAATTGAG, GCTCCACGCGGGCCCCGCCG, GCTTTACCCAAAGGAACGGG, GGAGGCTGCCAGGATAATAA, TCGCAGCCGCTCAATTACCG	6	5627, 6510, 2112, 327, 3791, 5031	0.5156	469	0.4926	470	1	1	3	6
GLYR1	AAGAAGCATTTCTTTCCGCG, AAGGACTTGAAGAAACCTCG, AGTTCCTCAGGAGAGCCAAA, GCAAACTTAGCCTGTCTGAA, GGGTAAACGATTCCAGCAAG, GGTTGGCTGCCATTTAAACG	6	5827, 2507, 340, 5140, 2677, 2126	0.519	471	0.4958	472	1	1	4	6
PHRF1	CCACTCGCTCTCGAATCGCG, GATGTCATCATCCACCGCGA, GATTCTGTCCTAGATCCCAG, GCACAGACGGAGAAGACGAG, TCTGCTTGAGATCTTAGACG, TTTGCCTGTAGCACACACCA	6	2134, 4911, 4067, 441, 3991, 3515	0.521	473	0.4982	475	1	1	6	6
IDO1	AGTTCTGGGATGCATCACCA, GAGAAAATCTCCAAACCTTA, GATACTTACTCATAAGTCAG, GCTTCGAGAAAGAGTTGAGA, TCTGCATAAACCAAAATAGG, TTTGCCCCACACATATGCCA	6	5935, 4431, 195, 3952, 2137, 3684	0.5217	474	0.4987	476	1	1	5	6
PADI2	AGAACTATCTCGTATCCGGC, GCACGTACACCGCCTCCACG, GCTCCCGTACTGCAGCCGCA, GCTGCAGTACGGGAGCCGCG, GTAGACATCGGTCCAGAGGT, TGATATTCCGGATTGCTCCG	6	5178, 7188, 377, 5436, 4625, 2163	0.5281	478	0.5076	480	1	1	3	6
HIST1H2BA	AAGAGATGCCAGTGTCCGGA, CTTAAAGCCCTTCTTGGAAA, GCACCTTTAGATGACACCTC, GGTGCTACCATTTCCAAGAA, GTGTGTGGTAGCTATGCCGG, TGTCGTTAAGACCCAGAAAA	6	4234, 332, 7489, 6070, 2166, 6698	0.5288	480	0.5086	482	1	1	3	6
DYRK1B	ACCAGGCCCAGATTGAGCTG, ACTATGCGAAGAAGAAGCGG, CCAGGATTCGAGCAACAAGA, GCTCAAATACCAGGCACAGG, GGTTGCATCCCGGAAGGCCA, GGTTGTCGTCATCATAACCA	6	5434, 4920, 5194, 2847, 193, 2190	0.5347	483	0.517	485	1	1	4	6
RRP8	CCTCAGAGTCACTTATACAT, CTCAGGCTCTTCGAACATGA, GCTTGCGGCTTAATGTATGA, GTAGGTCCCAAAGCCTGGAA, TCTTCCTCAGAGTCACTGCA, TTTCTTCCCTACTTCAGCAG	6	3854, 6489, 3666, 101, 3220, 2203	0.5378	487	0.5214	489	1	1	5	6
IL31RA	ACCAAACGTACAACCTCACG, CCAGTCCTAGAGAAAACACT, GAGATGTTATAGCACCAGAA, GGACAGTCAACAGTACCAGC, TACTGGAGATTAGAGAACAT, TGTCATAGCTCTGCGATGTG	6	5123, 5930, 459, 5410, 2206, 3426	0.5386	488	0.5216	490	1	1	3	6
TBPL1	ACATCACTGTCTGCATCCAT, CATCACTGTCTGCATCCATT, CTAGAATTACAGCTACAATT, GCCCGTAGTCTGCAGAAACT, TTAAGGAAGATTGCTTTGGA, TTATTTGCACTGGAGCAACA	6	2927, 3839, 3730, 2235, 411, 5795	0.5457	493	0.5292	495	1	1	5	6
EGLN1	AAGCACAAGCTCGTGTGCCA, GCTCGTGTGCCAGGGCAGCG, GCTGGTGTGGGCCCACTCCG, GTGCCGTGCATGAACAAGCA, TCTCCTGGAACAGCGATGAG, TGCAGCAGTAGAAGGAGCTG	6	2243, 69, 3738, 5319, 8438, 6989	0.5476	496	0.5314	498	1	1	3	6
POLR3G	ATACTTACAGGAAATAGTGG, ATATACTTACAGGAAATAGT, ATATATGCTGGCTTTGAAAC, GAAACACCTGAAGAAAGACA, GAGGCTGTTGGATTTAGCAA, GTGCCACTGAAAACAGGAGA	6	6609, 267, 5517, 2256, 7358, 3469	0.5508	499	0.5351	501	1	1	3	6
NEUROG3	CCAGCCCCACTCGCACACGG, CCGTGCCCGGAGCTTCCTCG, GAGGCTGCCGAGGGGCCCCG, GCAGGTCACTTCGTCTTCCG, TGGACAGTGGGCGCACCCGA, TGTCCAAGTGACCCGTGAGA	6	2285, 4492, 8601, 186, 5724, 3240	0.5579	507	0.5448	509	1	1	4	6
ATAD2B	CATCTTACAGATCCATACCA, CCTCCGCAGTGCAATCAGGG, GCATGGCAAGAGCAAGAAAT, GCTCTTCCGGGTGTTCACCA, GTTTGGCTGGAGGAGATACG, TTTGAGACAGAGAAAAACAG	6	2715, 2786, 2286, 301, 6598, 2510	0.5581	508	0.5449	510	1	1	5	6
DTX1	CTTCTCGTAGGCGTTCTGGA, GTGTGGGAGTGGGAGAACGA, GTTGAGGTTGTTCTGCCCCG, TCACAGGCATCAGCCCACCG, TCAGCACGTTCTCAATGTGG, TTTCGAGTACAGGCACCATG	6	3054, 3326, 116, 5673, 2304, 5786	0.5625	512	0.5506	514	1	1	4	6
TSHZ3	CCCTCCTCGGAGAAGAACAA, CTATGGCTCCATCTTCACGG, GCTCCTTGCTGGAAATGGAA, GCTCTGCCGGTACAGCTGCA, GTGCACCGTCAACTCCACCA, TTCATGGCAGGAAAACTCGG	6	5665, 6909, 2317, 357, 4573, 2980	0.5657	516	0.5539	517	1	1	4	6
CHD2	AAGCAGCCGAAGACTCAGCG, AGTCAGTCGGAAAGTGAGCA, GCTTCTCTTTGGCTTCTGGG, TCCTTAATATTAAATCGCGA, TGAATCTTCTGAGAGTCAGT, TGTTCCTGTTCATCTTCTGA	6	3580, 5325, 4366, 41, 5837, 2332	0.5693	520	0.5579	521	1	1	4	6
RNF14	AGGAGGACTGGAGGAGAAGG, CCCAGAACCAAAGTGCCCTT, CCTCCAGGTCAAAGAGTTAG, GACCAGGAGTGGCCACCGAA, TCAGGTCCAAGGAGGACTGG, TGGATCTGATGTAGACCAAG	6	8960, 4470, 5642, 6524, 2391, 285	0.5837	533	0.5736	534	1	1	3	6
MORF4L2	GCAGAGAAGTAAAATGAGAG, GCTCTCCCAGGAAGATGGGG, GTTCTTTCTGGTCTTCCTCA, TCAGCCCCCTCGGAAGAAAA, TCTGCAGATTGCTGTCCACG, TGAATGAGTTCCAGAAAGCA	6	355, 3713, 2415, 6952, 3958, 4540	0.5896	537	0.579	538	1	1	5	6
ELANE	CACAATCTCCGAGGCCAGCG, CACATTCGCCACGCAGTGCG, CCAGGACCACCCGCACCGCG, CCCCGGCAGAAACGTCCGCG, GAGCCCATAACCTCTCGCGG, TGTCGTTGAGCAAGTTTACG	6	48, 2621, 7247, 5075, 2421, 6379	0.5911	538	0.5803	540	1	1	3	6
SLC22A7	ACCATCATCGTGATGCCACT, CCTCCAGCCACACATCCTGA, CTGATGGCTGAAGTTGGCAG, GATGATGGTAAAACCAGCCA, GGATGTGGAGCACCGCACCG, GTTCATCCTCCAGCTCCCCA	6	4166, 4515, 171, 2450, 5039, 2970	0.5981	546	0.5868	548	1	1	5	6
SMARCC2	ATGTTGTGTATCCTGTCCCG, CCCCAACGTGAAGTACTACG, CGTGAAGTACTACGAGGCCG, GCAGTGTTCATGCCATTGAG, GCTCTCCCCGAGTTCTTCAA, TGACCCAGTTCGACAACGTG	6	4080, 3505, 443, 3692, 4928, 2473	0.6038	553	0.5933	555	1	1	6	6
BCORL1	CTGAAGTTAGTGGTAACCAG, GCAGTGCTACAGAAAAACTT, TCCCGCATCTGACAGCGCCG, TCGCATGTGTGGCATCAACG, TCTACAGCACCGCTCTACAG, TCTCTTTGTGGAAACCCACG	6	2635, 3590, 231, 2474, 5223, 7082	0.604	554	0.5935	556	1	1	4	6
PICK1	CCCACCTTTGTATAGCTCAG, CTTGGATTATGACATCGAAG, GAGCTGTCGCAGACTCACCG, GATTGACCTGCCATTGACAC, GGTGGCGAAGATGATTCAGG, GTTCTGAGCATCCTTCTGCA	6	2528, 2494, 2642, 6170, 4362, 305	0.6089	561	0.5979	563	1	1	5	6
AURKC	ACTATTTCCATGATGCACGC, AGATGAACAGCGCACAGCCA, ATTCTGGAATATGCTCCAAG, CCAAATTTCCCCTTGCCCAG, CTTCAAGTCGCAGATAGAGA, TTTGAAATCGGGCGTCCCCT	6	2644, 379, 2501, 4372, 3596, 3031	0.6106	563	0.6001	565	1	1	6	6
MYSM1	AAAAAGAGCTGTTTGAACAA, AATGGTAGAGGAAAGCCATG, AGGCGGATGTGGATATCGAA, GCACGTCCCCTTAAACATGA, GGCGGATGTGGATATCGAAG, TCACTGCTAGAATTCTTCTG	6	5925, 2603, 3919, 363, 5546, 4209	0.6355	580	0.6295	582	1	1	4	6
CDY2B	AATATTACTGATGACAGCAG, CAAACTCCTGGGAAGCCATG, CCTGCTGATCTGCTGCAATA, GATGTGACAAAGGGTCCCGG, GCATCTTCTTGATAAAAGGC, TCAGTTCCAAGAGTGAAAGG	6	344, 3488, 2605, 5667, 3849, 3026	0.636	581	0.63	583	1	1	5	6
SETD6	AGAACATCGGGTGCTCCAAG, CGATGGACTGGTACTCGCTG, GGAACCACTGGAGGAAGAAG, GGTGTGCTGCGACAGGAGCG, GTTGGCCAAATCCTTCTCCA, TGACCTATAGGCCATCACAA	6	6064, 3631, 5951, 2631, 4575, 282	0.6423	589	0.6371	591	1	1	4	6
CD3D	ACATGGGTAGAGGGAACGGT, AGCCTTACCTTGCGAGAGAA, ATTGCAATACCAGCATCACA, GACATTACAAGACTGGACCT, TCCTCTATAGGTATCTTGAA, TTGCAATACCAGCATCACAT	6	6740, 2637, 2777, 4551, 4256, 351	0.6438	590	0.6384	592	1	1	5	6
UCHL5	AATGAGCTCGGTGAAGACCC, CAGCCAGGAGAAGAACCAGC, CCTCATGGAAAGCGACCCCG, GCCTAAATGGACATCCTGGT, GGCCATGACGGGCAATGCCG, TGAGCTCGGTGAAGACCCCG	6	225, 5168, 2658, 3040, 2724, 4472	0.6489	597	0.644	599	1	1	5	6
PCGF6	ACATGAGTCACTTCTCGTTG, CCTCGTCCTCGTCCTCGAAG, CGTAGGCGCTGCCAAAACCG, GCAGGACTCGGAGGACGAGG, GTAGGCGCTGCCAAAACCGA, GTCTCTCCCGACCATGGAGG	6	4592, 5388, 79, 2664, 4101, 5906	0.6504	598	0.6457	600	1	1	4	6
ERCC3	ATGATGAAGAGGACGCCCCG, CCGAGGGAACCGCTTCCTGA, GGGATGTCAGATTTACCCTG, GGGTAAATCTGACATCCCCA, TAGTTTGTACTCATGCACAT, TCCCGAGTGACAGATCCACA	6	3236, 4913, 7, 2709, 7821, 6631	0.6614	610	0.6591	612	1	1	4	6
NAA60	AATCCGCTCCACTTACTCGA, ACAGGTGTGAATGACAGAGG, CCCACAGGTGTGAATGACAG, CTTTAAACTTTCAAGTAAGA, GCCATCCAGCGCGCTCAGCG, TCCCTTGCTGCAACCTACAG	6	4378, 5902, 2718, 2842, 3037, 100	0.6636	612	0.6618	614	1	1	5	6
ITGB3BP	AAAAGATCACTGAAGTTGGA, ATAACTTATTCTCCAACAAC, CCCGAATCTCAGAATGCCGT, CTTTGCTTTCAGTTAAACTG, TGTTAAAAGATCACTGAAGT, TTGATCCTTCAAAAATCACA	6	5953, 3931, 5241, 2744, 3602, 91	0.6699	616	0.6677	618	1	1	4	6
SMYD4	ACTGTGTCATGCTAACCGCT, ATACTGACCCAGGTGGAAGA, CCTTTCTTCATGCAGACCTG, GCATAACTGCATCCGTCACA, GGTGGAAGAGGGCTGCCGAG, GTGACAATAGAGGTCCCCAT	6	3726, 373, 4385, 6559, 6815, 2759	0.6736	621	0.6719	623	1	1	4	6
PTRF	CCACGCTCTATATTGTCGAG, CCTCCTGGACAAAATCATCG, GAGGCGCTGCCAGAGAAGGA, GCTGCCAGAGAAGGAGGGCG, GTCAACGTGAAGACCGTGCG, TCCCGGGTACCCCGACGCCG	6	6549, 3779, 4417, 2781, 487, 5149	0.679	628	0.6778	630	1	1	4	6
SP140L	ACTTTCTCAGGGAGAAAGAG, AGAAAGTGATCGAAAAGAAA, CTACTTTGGGAAAACCCAAG, GCTGGTCTCGAGTGAAAAGA, GGTTTGAAGGAAAAAAGAAG, TTTGGAAGCACTGTTCAGCG	6	7016, 3600, 5727, 128, 2816, 3136	0.6875	633	0.6858	635	1	1	4	6
M1AP	AGTTCTGCAGAGCCTCACAG, ATAAACTGAACAGGGACATG, ATATACTTACCACAAAAGGG, ATGTGCACAATGAGAAGCCG, GATCACAAGGTGCTTCTCTG, TCTGACCTATACCTCCCTGG	6	2819, 3144, 243, 3333, 4723, 4262	0.6882	635	0.6868	637	1	1	6	6
DEAF1	AGTGACAGTGGCCAACGTGG, GCACATGGACATGGGCGCCG, GCTCACTGTCGTACACAGAA, GCTCCCGGCCAAGAAAAAGG, GTACGGTGCCGGAACATCAG, TTTCTTGGCCGGGAGCCAGA	6	6762, 2, 7629, 5645, 7420, 2823	0.6892	637	0.6876	639	1	1	2	6
TAF7L	CTACTGATCCTAATATAGTC, GGAAAAAAGCAGCTTTACTG, GGTCCCTGATGTCAAAGAAA, GTACATTGAATCTCCAGACG, TAGTCAGGAAAAAAGAAAGG, TTTCTGACATTCTTAAGTGG	6	230, 6826, 2868, 2838, 7213, 4154	0.6929	641	0.6916	643	1	1	4	6
P4HB	ATACCAGCTCGACAAAGATG, CGGCCAGGCACAGCAGAGCG, CTGAGTATGCCAAAGCCGCT, GCGGAAAAGCAACTTCGCGG, GCTGCCACCACCCTGCCTGA, TTCTGCCTTCAGCTTCCCAG	6	2852, 74, 3888, 3165, 5104, 4582	0.6963	642	0.6945	644	1	1	5	6
DNMT3L	AGATCCCTCCCTCAAACAGA, CACGGTTTCGAACATCTCAA, CATGGCGTGCACCTTCCCCG, GCACCTTCCCCGAGGTCCCG, GTCATCGTCGTACAGGAAGA, TTAGACATCTGCATCTGCTG	6	5187, 65, 5932, 6981, 5425, 2864	0.6992	645	0.6964	647	1	1	2	6
TWIST1	CGACAGCCTGAGCAACAGCG, CGTCCCCCGCGCTTGCCGCT, GACCGGCAGCAGCCGCCGAG, GCAAGCGCGGGGGACGCAAG, GCGCAGCAGCAGGCGCAGCG, GCTGTTGCTCAGGCTGTCGT	6	5483, 4042, 125, 2872, 2890, 5938	0.7012	648	0.6984	649	1	1	4	6
SPI1	GATGTTACAGGCGTGCAAAA, GCACGTCCTCGATACCCCCA, GCAGCAGCTCTACCGCCACA, GTACTCACAGGGGGGACGAG, GTAGAGCTGCTGCAGCTGCG, TCTGCTCCAGCTCCATGTGG	6	3521, 392, 3657, 2877, 3005, 6996	0.7024	649	0.7	650	1	1	5	6
MLLT3	GACTGGATGGTGTTCGTACG, GGAATAAGTCATAATCAAAG, GGTGAGGAAAAAACCCACCG, GTACGAACACCATCCAGTCG, GTCGTGGGTGAAGCCCTCCA, TTAACCTCCAGGAAGAACCT	6	229, 5083, 2878, 5963, 5099, 4336	0.7026	650	0.7001	651	1	1	3	6
PRDM11	GCGGCGCTCACCATCCCACA, GGTGTGTCAGACACAAACAC, GTAAACGAGGTCATCCCCAA, GTACGTGGTCATCTCCCGGG, TGTCAGACACAAACACCGGG, TGTGTCAGACACAAACACCG	6	476, 2907, 3933, 7092, 4489, 4301	0.7097	654	0.705	655	1	1	5	6
MIER1	ACATTACCTGGTAATTTGAC, ATCAGATGTTTATGTTTAAT, ATTGGTTTACAGACTGTCTG, CAGCTGATGGATCAAATTCA, GGACTTGAAGATTCAACAGA, TCTGTTGAATCTTCAAGTCC	6	3039, 147, 2911, 3239, 6672, 2995	0.7107	655	0.7058	656	1	1	5	6
ID4	ACTGCTATAGCCGCCTGCGG, CTGTAAGGCGGCCGAGGCGG, GACGGCGCCTTGCGGCCCGA, GGCGGCAGCGCGCTGTAAGG, GGGTGGCTCCGCAGCCGCGG, TCCCCGCCGCCGCAGCCCGA	6	6289, 5769, 5034, 2930, 336, 4279	0.7153	658	0.7096	659	1	1	3	6
DHTKD1	AGAAAGACTGGTTTGCCAAG, ATACCAACGCCAGTTCCGCA, CCTGGAGGCCGTCAACCCCG, CGAGTAACCTTACCTCTGGA, CTGATGTTCCGTAAAATGCG, GTAGCCGTAAACGCCCCGCT	6	4309, 330, 4526, 2939, 4087, 4304	0.7175	660	0.7116	661	1	1	6	6
BPTF	CGACTTCTATCATATCCAAT, CGATGACTCCGATTATCCGG, GTACGATGACCACGAGAGCG, TCACGTTCTTCCTTACCAAG, TCTTCCTTACCAAGAGGCAG, TTTCTGAGAGACACCCCACA	6	4405, 7531, 5738, 8314, 349, 2966	0.7241	666	0.7168	667	1	1	3	6
MYOCD	AGTCAGATGCGGGGAAGCAG, CCAGCCACCAGTCAGATGCG, GCCTGTGTCAGGCACCAAAA, GGTGAGTTTCTCCAAATCCA, GTACATTCCCCCAGACCAGA, TGAAGACCCCCAAAACTCAG	6	4272, 155, 6354, 5863, 4706, 3021	0.7375	681	0.73	682	1	1	4	6
GTF2F2	ACCGGCGCCAAACAGAACAC, CAGACCCATGGCCGAGCGCG, CCAACACTTTGCAAGACAAA, CCCAACTTCACCTCTTCCAG, CTAGGAGCACTGACTGAAGC, TCTCCTTTAGGACTCAAGGA	6	3075, 8673, 3965, 5775, 329, 8835	0.7507	689	0.7417	690	1	1	3	6
SUV420H2	CTACCTCCGTGCCTTCCTGC, CTACTCCATGGAGACCAACG, GCCCGCTACTTCCAGAGCCG, TCATGTACTCAACCCGCAAG, TCTTATGGGTGCGGAAACCG, TGGTAAAGCCACTTTCCGGC	6	6172, 7078, 6086, 3077, 4471, 436	0.7512	690	0.7422	691	1	1	3	6
PPARGC1B	CATGTCTTCCTGGGAAACCG, GATCCTTACCTCCTCCACCG, GCAGCAGGAGGAGGAAGACG, GCGGGAGCTGGGCAGCCCCA, GGAAGAGCTCGGAGTCATCG, TGAGAGCTCGTCCACCTCAG	6	173, 3621, 8993, 8764, 3143, 6617	0.7673	703	0.7569	704	1	1	3	6
BABAM1	CCAAAGCTGGAGTCGTTCAA, CCTCACCCTCACCCTCGCTG, GCACTCGCTCCAATCCTGAA, GGTCCAAATTCGGACACCAA, GGTGGTGGTGAACGATGACA, TCAGGATTGGAGCGAGTGCG	6	5417, 5167, 473, 7608, 4921, 3155	0.7703	708	0.7597	710	1	1	3	6
HR	ACGCCCTTCACTGCACCAGA, AGAAGGAAAGGGCAGTGCCA, GAGCAGTTTGAATGTCCACG, GCAGGCTCTCCCAGGCACAG, GCTGGCCCGCAGAATGCCAG, TCGACCTCAGGGCAGCCGCG	6	6665, 387, 4457, 5035, 5359, 3158	0.771	710	0.7603	712	1	1	3	6
SMYD2	ACGTGCTCACGGTCAACGAG, AGAAGCGCTCCAGGCCGCCG, CCTGTGCAAAGAGTACTACG, GTTAGTCTTACAGTCTCCGA, TGGTGAAGCAGTACTCGCAG, TGTTAGTCTTACAGTCTCCG	6	5610, 7335, 3890, 452, 3345, 6173	0.8167	737	0.7954	737	1	1	3	6
PRDM2	CTTCTGCTGTTGACAAGACC, GATGCCACTGATCCAGAGAA, GGGTCTTGTCAACAGCAGAA, GTACCCGAACATGTGCTGCG, TGTATTACCCAAATTTGGGA, TGTGCTGCGAGGACTTCCGG	6	6350, 274, 3737, 3354, 5015, 5303	0.8188	738	0.7976	738	1	1	3	6
CITED1	AGTTCCTCGGGATCTCCAAT, CGTGGCCTACTCCAACCTTG, GGAGATCCCGAGGAACTAGT, GGCCATTCTGCACTACCCTG, GGTGAAAGATCGCAAAGCAG, TTCCATTTGAGGCTACCCCA	6	3408, 4230, 378, 3366, 3411, 3992	0.8218	742	0.7995	742	1	1	6	6
MT3	AGGTGGCTCCTGCACCTGCG, CGCGGACTCCTGCAAGTGCG, GCACTTGCAGGAGTCCGCGC, GCAGGAGTCCGCGCAGGTGC, GCGGACTCCTGCAAGTGCGA, GGGGCTCACCAGAAGGGCAG	6	3524, 59, 6032, 6950, 3415, 5918	0.8337	750	0.8082	751	1	1	3	6
SP110	ATTTACAGAAGCTTCAAACG, GATCTCATCGCTTTGCTGGG, GTGCAGGGAGAGGCAGGACA, GTTAACATCCAAAATGAATG, GTTCACCATGACAAGAGCCA, TTACCTGGCATAGAGCCCAA	6	4868, 280, 7182, 5027, 5446, 3445	0.8411	754	0.8133	755	1	1	3	6
RAP2C	AGAGATCTCTACATCAAAAA, AGTGACAAACTGCACAGTAA, CATGAGGGAATACAAGGTAG, CTACCGCAAAGAGATCGAAG, GGTGAAGGTGAGACTCATGA, TTTGCGGTAGAAATCTTCAA	6	241, 4192, 5923, 3454, 4978, 6573	0.8433	756	0.8144	757	1	1	4	6
SUPT7L	AACTCAGCTGGCACTCCTGT, CAATCCTGAGAAGGCCACAG, GAGCAGGTATTCCATGAAGT, GCAGCTCCTCTACCAGGCAG, GTGCTGCCAGAACTTCTGGA, TAGCACAGTCAAAGCCCGCG	6	51, 4759, 3532, 6949, 7035, 7012	0.8623	765	0.8273	766	1	1	3	6
KDM1A	AATAATACTCATCTTCTGAG, CGAGTTGCCACATTTCGCAA, GATGTTATCTGGGAAGAAGG, GCTGGGCCCGACAGGCCCGC, GGAATAGCAGAGACTCCGGA, GGGCCTGTCGGGCCCAGCCG	6	8087, 4083, 3547, 210, 6447, 4038	0.866	768	0.8302	769	1	1	4	6
RBBP8	ATTAAAAGATGACTTATCAG, GGTAGAGCTCATCACCAAGG, GTATCTTGCTTACTGGCCAT, GTTCTATGTATCGGACATGG, TGGTAGAGCTCATCACCAAG, TGTGATTTCCTTCCAGACAG	6	4798, 6932, 3549, 233, 6165, 6421	0.8665	769	0.8304	770	1	1	3	6
LIN9	CAGCCTTTGAAAAAGCGGCG, CTCCGCCCCACAATGCACCG, GCGCGGCTCGTTCAAGATGG, GGCGGCTTATGGGAAAACCA, GGTCACCTAAAAGAAACCAG, GTCACCTAAAAGAAACCAGA	6	6872, 3609, 3906, 8122, 212, 7072	0.8811	785	0.84	785	1	1	3	6
KDM2B	CCAGCGATACGACGAGAACG, CCTCACTCAGGAATACCAGA, CTGCCCCCACAGATGCCCCG, GTAGACTCTTTGGTGTTCGG, GTTGGCGGCCAACTTCACCG, TCTTTGGCCAAGTCACCACA	6	3649, 5736, 6193, 484, 7878, 4733	0.8909	793	0.8459	793	1	1	3	6
OGDH	ATCAGCATCCAAAATCCCCA, GAACTAGTCCCACTGAGAAA, GACTAGTTCGAACTATGTGG, GATAATGTCAGCGGGCACGG, GTTGGGCTGTGCTTCTACCA, TCAGCATCCAAAATCCCCAG	6	5048, 7388, 6946, 3679, 6454, 335	0.8982	796	0.8507	796	1	1	2	6
TLK2	AGCTGCTCTGTGTCAAGCCG, CAGTGATGCTAGCAAAACCT, CTGCCATCTAAACCATAGAG, GGAAAGGATAAATTCACAGA, GGGAAGAGATAGAAAGACAA, TCTGACTTAGAGAAGAAGGA	6	3697, 6991, 7070, 5809, 6278, 201	0.9026	799	0.8532	799	1	1	2	6
HIST3H2A	AGTCAAGTACTCGAGCACCG, AGTCGCGCTCGTCGCGCGCG, CACCGCGGCCAGATAGACCG, CGCCCCGGTCTATCTGGCCG, GCGGGGCTGCAGTTCCCCGT, GGGCAACTATTCGGAGCGCG	6	7644, 245, 6780, 6536, 3828, 5122	0.9346	819	0.8702	819	1	1	2	6
SETD1B	ACAGATGTCCAGCAACCGCC, CATGGGCAACATTATCCACG, GGAGGACCCACACAAAGCCA, GTACATAATGATGTTCGTGG, GTGCTCGCCCGACTTCACCG, TTATGTACACAATTCTCCCG	6	6829, 4678, 4785, 3899, 43, 4177	0.9519	836	0.8787	836	1	1	5	6
C14orf169	ACAGTAGTAGAGAAAGCCTG, CGTATCTTCCTGGACCTCAA, CTGCGGACAGAGGAGACGCA, GACGGCCGCTAAGTGTTGCG, GCGAAGTGTTGTATCCCGCA, GGCCTGGTACAGGGACCACG	6	5672, 5468, 8605, 4073, 395, 6330	0.9944	859	0.8983	859	1	1	2	6
KDM1B	AAAATGGCTACACCTCCCGA, AATGTAATGGCAACTCCACG, AGATCATTGTTCCCTCCCAG, GCTTTGCAAGTGCTTCTGAA, GGAGAGATGATACCATCGGG, TTCCTTTGAGGAGCTCCGGT	6	6412, 4221, 5107, 4883, 5825, 34	1.03	883	0.9134	883	1	1	3	6
SENP6	AGAAGAGTCCGAATCACAAG, GATCATGAAGAAGAAAGTGA, GCAAGAGCGGCGGTAGCGCA, GCGTGGGAGGAGGAAGATGG, GTAAGGTTAAGTCGGCTCCA, TTACAGGCTCTATTAACAGC	6	438, 5872, 8151, 8980, 8089, 4403	1.07	915	0.9283	914	1	1	2	6
RNPS1	AAGCCCACCAAAGTGCACAT, AGGATCGCTCAAAAGATAAA, CCTTGGACTTCTCATCTGAG, GAGTCGAGTGAGAAGGATCG, GCTAGAGCTGGAGCTGCGGG, GGATCGCTCAAAAGATAAAG	6	5718, 468, 6755, 8583, 7292, 4509	1.1	923	0.9367	923	1	1	2	6
PHF20	AAGCATCCACCTAACAGACG, AATCTCTTGTAATTCCACAA, AGAACCACTCATCATAACGA, AGGGAACCCAAAAGAAAACG, GGAAAAGTCAAAAAACTACT, TTATGATGAGTGGTTCTGCT	6	6359, 6511, 6373, 281, 6208, 4531	1.11	928	0.9384	928	1	1	2	6
SRSF4	ACTTATGCAGATGCTCACAA, AGAGCTTTGGAAAAGTTGGA, AGGCGGCCGATGTACACCCG, CTGCCGTTGCCGGGATGCCG, GGGATGCCGCGGGTGTACAT, GTAATTGTTGAGCATGCCCG	6	5221, 6788, 6490, 199, 4740, 8568	1.16	957	0.9551	957	1	1	2	6
SETD5	AAAGCACCGGAAGATCCTGA, AGGTTATTAGACTTCATCGG, CTAGACGTAGAAAAGCACGA, GTACTTTCGGTAATGATGCT, GTGTTGGTGTGAATACCCGG, TGTTGCTGTATACAACACAG	6	4756, 429, 5658, 5881, 4824, 5007	1.16	958	0.9559	958	1	1	3	6
ZSCAN1	ACTTTCCTCGGGGAGTGCTG, AGCAGCCCCAGCACTCCCCG, CCAGCCACTCACTTTCCTCG, CCGGCAGTTCCAGTACCACG, GCAGAGTCTGCACACCAGGG, GGTGCGGCCCGCTCGCCACG	6	4942, 7557, 244, 4837, 5800, 5533	1.18	969	0.9605	969	1	1	3	6
POLR2E	CCTGGGTCACCAGATAGCCA, CTGCAGCTGTGCCACGACCG, GCAGGAGGAGAACATCACAC, GGGACAAGCCGAGTGAGGGG, GTACTGCCAGCGCATGCAGG, TTGGGCTTTGAACTCCTCCA	6	7883, 3, 6705, 5108, 7551, 7649	1.25	1008	0.9744	1008	1	1	1	6
PSMC3	AATGTCACTGTATTGCTCCG, ATATTGACCTGGACTCCCAG, GCATCCACCAACCCAATCAC, GCGCTGGATGATCTCCTCCG, GCTAAAGCCAGGAGACCTGG, TTTGGACAAGCAGATCCAGG	6	7305, 26, 5211, 6298, 7981, 6223	1.27	1019	0.9777	1019	1	1	1	6
SUPT5H	AGTTTAAGCGGCCTCCACAG, GCAGGGCAAGATCCTCAGCG, GCGCATCAAGGAAATGGCCG, GCTGGGGGCTTAGATCACGG, GTATGAGGACGAGGACCAGT, TGTAGGTAGACGAAGAGCGG	6	17, 8562, 5543, 6460, 7901, 5362	1.31	1040	0.9834	1041	1	1	1	6
MED21	AATCAGTGCTGCAAAAAGCT, ACATTGCTGCAATACTCCAA, ATATTATTGAAAGAGGCAGG, ATTGGAGTATTGCAGCAATG, TTACCTTCTGTAGGGTTAGC, TTGCTGCGGTAGGAACATGG	6	6525, 6345, 8510, 5852, 39, 7010	1.43	1094	0.9938	1093	1	1	1	6
NUDT21	CATGTGTTACTGCTGCAGCT, CCGAACTGAGTGACCCCCCG, CCTGGGTTAAGTTCACCACC, CCTGGTGGTGAACTTAACCC, GAATGAGGAGGACTGTAGAA, GAGCTGTCCTTCTCGTAGAG	6	8204, 299, 6371, 8030, 8372, 8265	1.56	1163	0.9983	1158	1	1	1	6
CPSF3	ATAGGAGATCAATCTCAGCT, CATCCATTCCTTCTAGGCCA, CTAATGTGTTTGAAAACAAA, CTTGTCTTCTGTAGAAACCA, GAGCTCCACAGTGATCCAAA, GATCTCAATCATGAACATGG	6	7206, 6711, 240, 7480, 8553, 8623	1.64	1192	0.9993	1194	1	1	1	6
RNF4	ACAAGCTCAGAAGCGAACTC, ACTCAGAGAAAGCGTCGTGG, CCAGTTTCCACGAGTTCTAT, GACAAGCTCAGAAGCGAACT, GCTACTCAGAGAAAGCGTCG, TGCTTCCAAGGAGATCTCGG	6	7118, 7915, 306, 7157, 8155, 7059	1.72	1234	1	1249	1	1	1	6
TAF2	CAGAGTATGAATCAACACAA, CTACATCCCATATTTGGTGG, GATGTGGTATGTTTCAGCAA, GTACCGCCATTGGATTAAAG, GTGGGTATCAAAATTCTACA, TTTGTGGTACCCAGTGTAGA	6	8944, 400, 8794, 8003, 8302, 7055	1.72	1232	1	1250	1	1	1	6
DAPK3	CGACATCTTCGAGAACAAGA, GCGGGAGGTGAACATCCTGC, GCTCCTCCCCCATCTCATAA, GGAGCTCTTTGACTTCCTGG, GGCCTCACCCACAAACTCCG, GTTCTCGAAGATGTCGTGCA	6	513, 553, 599, 4520, 6269, 937	0.135	68	0.0583	68	0	4	5	6
SET	ACATTTGTCAACCATCCACA, ACCTCTTCTGAAAAAATGGT, ATGGGAGCGAGGCATCATGG, CGTCCGGCCGCACCATGTGG, GCACCATGTGGCGGCGGCGG, GCTTGGGGAGGAAGATGAAG	6	5066, 8515, 584, 713, 520, 7279	0.1426	73	0.0641	73	0	3	3	6
L2HGDH	AGAACACCAATAGAAAGTGA, CTGACAGTACTCATAGAGGA, CTGCGGCTACCTCCACACAG, GATATAGTCATCGTTGGTGG, GCAGGAGGATATAAAAAAGA, GCCACCGGCGAAAAGCCCGC	6	5656, 4103, 3277, 611, 2158, 605	0.1492	76	0.0697	76	0	2	5	6
PSAT1	AAAGTTGACCACCTGCCTGG, ATATCGTTCACCCTAAACTT, ATTTGCGCAATAATACACGT, GCTGTCCCCTTAAACCTCAT, GTATTATTGCGCAAATGAGA, TCATTGGCTTGAAAGCAGGA	6	5051, 3258, 621, 5004, 2728, 585	0.1516	77	0.0715	77	0	2	4	6
CENPQ	AAGCACACTAACCTAAAACA, ACTCTTTGACAGAGGTTGCC, ATTCCATCATAGTTTGCAAA, CAGCCAGCAAGAGAAAAACC, GAAAGTCCCTCCCAAAAAGA, TCTCTGGTACTCTTTGACAG	6	4188, 4161, 685, 6537, 527, 8953	0.1672	87	0.0857	87	0	2	4	6
BIRC2	ATATTCAACTTTCCCCGCCG, ATGATGCTATGTCAGAACAC, ATGCTATGTCAGAACACCGG, CAACTGCTCTAGAATTAAGA, CATGGGTAGAACATGCCAAG, CCTTTCTGAGACAGGCACCC	6	4395, 675, 4510, 5216, 692, 7138	0.1689	88	0.0875	88	0	2	4	6
KDM3A	AGAACATGCACCTTCCCCAT, CGAATGGTCCCGGAGAGCCA, GATACTGCTTGGCTGTACTG, GCTTGGACCCATCTACTCAG, TCTGTTGCTCCTTATCCTTG, TTTCTGAACGAATTGTACAG	6	695, 601, 2030, 6868, 2303, 6200	0.1697	90	0.0879	90	0	2	4	6
TRIM66	AGCAGGAGAGCACATCCCAG, GCTCTTTGCTGAAAAGAAAA, GGATTACTAATGAGAGAAAG, GGTGAATCTGATACTCCAAG, TGAGCAACCCAAGATGGCCA, TGTCCAGTCCCAGAGCCAGG	6	6386, 666, 732, 7393, 3939, 4963	0.1787	97	0.0955	97	0	2	4	6
AES	CAGTACTACGAGATGTCCTA, CCTGCCCTACCTCTCCCAAG, GATGCAGCGTCACTATGTGA, GATGCGGTCGCAGGAGTCCG, GCAACTCAAATTCACCACCT, TGGCTCTTACCTCTTGGGAG	6	1773, 5787, 2270, 734, 536, 6107	0.1792	98	0.0958	98	0	2	4	6
PHF2	AGTGACGTCGAGAACTACGT, ATACAGGGAGATGTTGGCCG, CGACAGTATTCACTTCCGGT, CTTACAGGTGGACTTCCCAT, GCTCACGCTGGGCTACATGG, GGTGTCAGAGAACTCGAGGT	6	737, 5180, 3646, 671, 2876, 4400	0.1799	99	0.0967	99	0	2	5	6
NCOA4	AATACCTTCCAAGACCAGAG, GCAGGCTCAGCAGCTCTACT, GCATCACTACACCTCAAAAG, GGAATGTCTTAGAAGCCGTG, GTAAGGAGCTTGATAACCAC, TGAGGTGTAGTGATGCACGG	6	2067, 552, 3753, 5309, 747, 6317	0.1824	102	0.0998	102	0	2	4	6
TANC1	ACTGGCAGAAAACAGAGGCG, CTAAGATTAGGGGTTCAGAA, GCACGCCTACGTCCAGCACA, GGATCGGCTACAGCACCGAG, GGTGCTGTAGCCGATCCACA, TGTGCTGAAGAAGAGCCGAG	6	7287, 3690, 539, 754, 750, 4655	0.1831	103	0.1008	103	0	3	5	6
SETDB2	AAGGAGTCTACGAAACGTGG, ATTCCGAGCCAACTGAACAT, CATTCACTAGAATCATTGCT, GATTCCTGTGACTGCTCTGA, TTAAGTACAGAAAGACTGTG, TTTCGTAGACTCCTTCCACA	6	1747, 2426, 781, 769, 4777, 1199	0.1907	111	0.1089	111	0	2	6	6
SLC22A13	ACATGGGCAAAAAAGTAGAA, GCTCCCATCCCTGAAGAATG, GCTGAAGCTAAGTCCAGCGA, GGAAGTTGAGAACACACAGC, GGTGCTTCCGATCACAAACC, TCACCCAAGCCACTGCACAG	6	3377, 1494, 792, 4903, 2535, 570	0.1934	113	0.1122	113	0	2	6	6
MTA1	ACCGGGGGCGGACAACGGCG, CATGGCCGCCAACATGTACA, GATAAAGGAGAGATTCGAGT, GCAGATCGACCAGTTCCTGG, TCTGCTATAAGGCCGGACCG, TTTGGCCTCCACGTTCCCAT	6	4424, 795, 3069, 1525, 517, 2508	0.1941	114	0.1129	114	0	2	6	6
SMAD2	AGAATGGGCAGGAAGAAAAG, AGCAGTCTCTTCACAACTGG, CTAAATGTGTTACCATACCA, GAGTGAGTATAGTCATCCAG, GTTAGGATCTCGGTGTGTCG, TCTTCACTGATATATCCAGG	6	5169, 2897, 6487, 796, 576, 3231	0.1943	115	0.1131	115	0	2	4	6
SETBP1	CAAGGAGGCAAACTTCACAG, GCACAGCCAGGAGCAGCTGG, GCTTGGCTGAGGAGACCGGC, GGGCGAGTCAGACTTCCTGC, GGTCCTGGAGTGGAGAGCAA, TGTGGATTCCAACTCCAACG	6	1189, 8130, 4037, 824, 745, 2143	0.2012	120	0.1198	120	0	2	5	6
MEG3	ATAGGTGCAGGGTGTCCCCG, CGTCCCTGCATTCACCCGCG, GCAGATTCAAGCTATCCCCA, GGACACCCTGAGGAGACACG, GGAGATGGAGACACCAGCAG, TGATGCGGTTCCAAAGCACA	6	3567, 5824, 843, 5601, 1588, 684	0.2058	122	0.1243	122	0	2	4	6
TCEB3	AAGAAACCTGGAAAGCCACG, CATCACTCTTGGCATCCACG, CATCTCCTCCTCCTTCTGCA, CCACAAGGACAAACGCCCCG, CCTTCTGCAGGGCATCCCGA, GCTATAGGATCGGCTCCCCG	6	658, 3897, 2973, 844, 3121, 2998	0.2061	123	0.1245	123	0	2	6	6
MAPK8	AGAATCAGACTCATGCCAAG, ATTCTGCTGGAATTATTCAT, CAGCATCTGATAGAGAAGGT, CCTTGAGCTCCTGAGCCTAT, GCATGAGTCTGATTCTGAAA, TATCAGAATTTAAAACCTAT	6	595, 849, 4090, 4750, 1876, 2027	0.2073	125	0.1261	125	0	2	6	6
IDH2	AACTATCCGGAACATCCTGG, ACACCCTCGCACCTTCCACA, CCACCTCGCAAGAGCAGCCG, GGCCACCCAGAAGTACAGTG, GGGCATGTACAACACCGACG, GGTCACGGTTTGGGAGCCCG	6	681, 3739, 2667, 857, 5029, 2139	0.2092	128	0.1288	128	0	2	5	6
L3MBTL4	AAAGAGCGTTTGGATCAGGA, AGAACTCTGATAGCACCCCA, ATAATTACCGTGACTCAAAG, ATATTTGGCAGAAAACCATG, CATGAACTGCACATCCCTAA, CATTGATCCCCGACATCCAT	6	3477, 4411, 867, 2657, 2845, 825	0.2117	129	0.1306	129	0	2	6	6
SIK1	ACCTGAGTGAGAACGAGGCG, CTTCCCCTCAAAGACTTCCG, GCATCGAGTCACCAAAACGC, GGTCCACCACCAGCATGCGG, GTTCTCACTCAGGTGCCCGT, TATCATGTCGGAGTTCAGCG	6	1954, 883, 794, 4667, 3487, 1717	0.2156	132	0.1346	132	0	2	6	6
PML	AACCCAATAGTACCTCTGTA, AGCAGAGCTGCGCAACCAGT, AGTCGGCCGACTCTTTGCAG, ATAGTACCTCTGTAGGGCTG, GCGCTGCCAGCAATGCCAGG, GCTGTGCTCAGGATGCCTGG	6	4291, 2593, 897, 4324, 712, 2049	0.219	135	0.1382	135	0	2	6	6
P4HA2	ACCCAGGCACAATTTCCAGA, ACTGGAAGACAGCATAGCTG, CCAGTTTGTAGGCATTCACA, CTATCTCGTCCTCATCAGTG, GTACTTTGAGCAGTTATTGG, TCGCCAACCTCTCTGTGCAG	6	912, 548, 5053, 4771, 2384, 2162	0.2227	137	0.1429	137	0	2	5	6
HINT1	AGGCCGAGCGACCTGAGCCT, CCAAAGATCGTGTCGCCACC, CTTTGGGAAGATCATCCGCA, GATGGCAGATGAGATTGCCA, GCTCAGGTCGCTCGGCCTGG, GGTATCACCAGAAAATGTGT	6	1664, 3403, 914, 1370, 6488, 812	0.2231	138	0.1433	138	0	2	5	6
TNP1	AAGAGCCGATCTCCTCACAA, CACAAGGGAGTCAAGAGAGG, CCTCACAAGGGAGTCAAGAG, TAAAGAGTCATGGCATGAGG, TGACTCCCTTGTGAGGAGAT, TGCCATGACTCTTTAATTTG	6	5479, 2446, 918, 6920, 3197, 703	0.2241	139	0.1441	139	0	2	4	6
HMGB2	AAGGAGACCCCAACAAGCCG, AGAGCACAAGAAGAAACACC, GGAATTCTCCAAGAAGTGTT, GGACTCTTCCGTCAATTTCG, GGAGAATTCCGCGAAATTGA, GGAGACCCCAACAAGCCGCG	6	2129, 920, 544, 1183, 2219, 6175	0.2246	140	0.1446	140	0	2	5	6
RCBTB1	AATAGACGCGATCTCTTGAG, AGAGATCGCGTCTATTCGGA, GCAAAGCTGCCACTCTCACA, GCCATTGTCCAGAACAGCCA, GCTTGAAGCCAGAGTCATGG, GTACAGTGCTTCACTGGCTG	6	4844, 5494, 2428, 4168, 931, 744	0.2273	143	0.1476	143	0	2	5	6
HIST1H2BI	GCATCTCGTCCAAGGCTATG, GGTGACCAAGGCACAGAAGA, GTTCATAATCCCCATAGCCT, TCAGCTCCCGCCCCGAAGAA	4	1484, 6786, 589, 5433	0.2686	189	0.1499	146	0	1	2	4
KAT6B	ACAACCCAGCCTTTCAGCAG, ATATTCCTGTGGGTAAGGCG, ATGCGGTCAGTACTTCCCAT, TCTTCATCTGAGTTGTCAAA, TGTCAACTAGAGCTAACAGT, TTTGTACTAAAGAAGAAAAG	6	3844, 6240, 2934, 972, 903, 3343	0.2373	154	0.1593	155	0	2	5	6
CRYM	CGAGGACCGCGGCATCACCT, CTCTCCTTGTAGCTACCTGG, GGTGCCGGTGACCAAGCACA, GTAGAAGGTGACCAACTTGG, GTCACCTTCTACGAGGACCG, GTGCTTGGTCACCGGCACCA	6	973, 3098, 764, 1455, 8450, 1942	0.2375	155	0.1595	156	0	2	5	6
HDGFRP2	AAGCCTCTCCCGAAGCCGCG, AGTACGGGAAGCCCAACAAG, CACACCTGAGAAGAAAGCAG, GCATCAGTGAGTGGAAGCGG, TCACTGCTGGAGCTGGACGG, TCTGTGAAGAAGCCTCCGAG	6	505, 989, 1626, 7525, 5356, 1752	0.2415	158	0.163	159	0	2	4	6
CCNT2	GCTCTCGTGCCGCCAGCAGG, GGGTCAGGATAACAACCTGT, GTACCCAGTTAGTAAGAGGT, GTTACTCTAGAATTATTAGA, TATCCGCCTCCACTCCGCAG, TCACATTTAGTATCCAGCAG	6	1339, 715, 4408, 995, 2201, 4195	0.2429	159	0.1643	160	0	2	6	6
CLP1	AAGGTGTGAGGTGAACCGAA, AGACATAAGCCACCTCAGTG, GCGGAAAAGGAAGAAGAGCG, GGCTGTTCTGTGCAACTGAG, GTAGACTTGCCCACATCAGT, TAGACTTGCCCACATCAGTG	6	7516, 677, 5630, 3412, 7038, 997	0.2434	160	0.1649	161	0	2	3	6
UBE2NL	ACTTGCAGAAGAATACCCAA, GATGATCCTGTGGGGCAGCT, GGTCATTGCTGGGGAATCAA, GGTTTCCTTGATGATCCTGT, GTTTCCTTGATGATCCTGTG, TGGCTCTGCCAGCAAACGCT	6	1081, 777, 7019, 5571, 3578, 1002	0.2446	161	0.1665	162	0	1	4	6
SMYD1	ACAGTCTCTGAGATGACAAT, ATACCTGTCAAAAACCACTG, CCTCCCCAAAGTGCTCCACG, GAAGGCACCGGGCTCACGGA, GGACGACTTGCAGAACCACG, TGAGCGGGCTTATTCCGCAG	6	1005, 5535, 4829, 6508, 640, 1841	0.2454	162	0.1674	163	0	1	4	6
WWC1	AGGATCCTCGAGTACAATGG, ATTAGTGATGAGTTGCCGCT, CCACCAGCTGGATCGACCCG, CTGCATCACCACCATCCACG, GGATCCCTCACGTCCAGCCG, TATGCCTCTTCCCATCCTAG	6	7100, 789, 4016, 6837, 3808, 1013	0.2473	164	0.1694	165	0	1	4	6
HMGN3	ACGGTCTGCCAGATTGTCAG, ATCCAAAGTAACTAAACAGG, CTAGTCTCCAGAGAATACAG, GTAAGACTTACCTTTCTCTT, TAGTCTCCAGAGAATACAGA, TCCCTTTGTAGCCCACAAGA	6	1758, 6347, 980, 2180, 1015, 2282	0.2478	165	0.1698	166	0	1	5	6
PIWIL2	AAGCATTTCCCGTTTCAGAG, ACCTTCAGCACACCGTCCCG, GATGCGTCTTTATTACCACT, GCATCCGAAGGACAGATGGA, GGTTTGGTCTCCATGTTCCG, GTTCCACAGTCAGGACCAGA	6	3575, 1999, 1018, 1066, 1004, 5448	0.2485	166	0.171	167	0	0	5	6
HCFC2	ACCATCACAGACAAATCCAT, CGCCCGGCACGGACACCGAG, GAGAAGCTATGTCCAAGCCG, GCTCCCGGATGGCCACCGCT, GGACAAGGAGGTAAACCAGA, TATGAGTTGGAGCTACAGCA	6	4501, 5876, 939, 1024, 1418, 3024	0.25	169	0.1729	170	0	1	5	6
HMG20B	CTGCAGCCGGTGAAGAAACG, GCAGATCCGCACGCGCCACC, GCGCGGCGAGGGTCCACGCG, GGATCAGTGCACTCACGCGG, GTGACTGTCAAGCAAGAGCG, TGAAGCCTATAAGATGTGCA	6	1030, 803, 4861, 6620, 5948, 2095	0.2515	172	0.1739	173	0	1	4	6
SKIL	ATAAACCCTGACATTTGCCT, CATTCAATGCCCCATCCTGT, GCGAGCTCTGACTACTTAAA, GTACCTTTAAGATATGAAGC, GTTCTGTGGAGCTATCTGAA, TCAGGCTGAACATAAAACTG	6	2767, 6935, 944, 3437, 5618, 1045	0.2551	177	0.1776	178	0	1	4	6
PHF11	CATAAAAGAGGAGCCACCGT, GTAAAGAAAGAAATCCAGAG, TCAGGAGTGAAAAGAAAAAG, TCATAAAAGAGGAGCCACCG, TGTACATGATTGCCTGAGAG, TTCCCGATCATCGCTCAAAG	6	1053, 806, 2123, 2122, 4939, 4265	0.2571	180	0.1801	181	0	1	6	6
UBP1	GCACACATCACATACTGAAA, GGAAGATTCCAGCCTTCCAT, GTACCTCATGCTGTAAGCGC, TATTCCACAGAGCATCATAA, TTAAGCCTAAAGGTGCAGAC, TTTACTCCACGGAAGCACGG	6	2596, 861, 5328, 1063, 5126, 3650	0.2595	182	0.1819	183	0	1	4	6
PCGF5	ACTTACGTTCTCGTAGTCCA, AGCCACGAATGGCTACCCAA, GATCAAGCCAACAACAGTGA, TCACCTTCTTCATCTACTTT, TTACCTGCTATATCTGTAAA, TTTCACCAAGTGTTTCCTTT	6	4552, 1502, 901, 1667, 1451, 1073	0.262	183	0.1843	184	0	1	6	6
STAT5B	ATACAAGCTCAGCAGCTCCA, ATATATTGTACAATGAACAG, CTATGCCACACAGCTCCAGG, GCATCAGCAAGGCTTCCAGC, GTTCATTGTACAATATATGG, TGCTTGGCTTTCAATCCACT	6	1044, 2052, 1080, 5263, 4445, 3565	0.2637	186	0.1857	187	0	0	5	6
HIST1H1D	AGTATCTGAGCTTATCACCA, CGCAAGCGCTTTCTTAAGCG, GCAGCTTCTAAGGAGCGCAG, GCAGGAATGGTAGGAGCAAG, GTGATAAGCTCAGATACTGG, TGAGCTTATCACCAAGGCAG	6	1571, 1091, 1051, 5482, 4641, 3701	0.2664	187	0.1894	188	0	0	5	6
GFPT1	AGCTGTGCAAACACTCCAGA, CCCGGTGGAAGAAAAAGCAG, CGAACTGCAGGAGATCACCC, CTTCAGAGACTGGAGTACAG, GTTCTCCATGTGTTGCCCAA, TTAAGTATATGTATGACAAT	6	5680, 1075, 7194, 6667, 1096, 1763	0.2676	188	0.1911	189	0	0	3	6
CDYL2	AGTGAAGAGGAAGCTGGAAG, CCCTGGCCAAGCCAAAAAAA, GAAAGGCTACGGGAGCACCG, GCAAGGGGACCTCCCATAAA, GCGTGACAGTCGAGGCCCGT, TCAGATCCTGGAAAGAGCAA	6	1104, 1098, 5760, 5962, 5037, 4860	0.2695	190	0.1929	190	0	0	3	6
UBE2V1	CAAAGCAAACTGAGTGATGA, CCTAGAAAATTTCACTGCAA, GTAACAAAAATTAATATGAA, GTTACAAATCTTACAAAGGG, TGTTACAAATCTTACAAAGG, TTTGTTACAAATCTTACAAA	6	3874, 723, 1106, 7316, 3658, 2801	0.27	191	0.1937	191	0	1	5	6
CCND1	ACATTTGAAGTAGGACACCG, AGGAGGTCCTGCCGTCCATG, CCGCACCTCCAGCATCCAGG, CGTGCCTCCGTAGGTCTGCG, GGTCTCCTCCGCCTTCAGCA, GGTGGCGACGATCTTCCGCA	6	2859, 6082, 1107, 891, 2170, 1120	0.2703	192	0.194	192	0	1	5	6
INO80C	CTTCCACTCCCGGAATAGTC, GGTCCTGTGCTAAACTCAGA, GTGCCCTCTGAGTTTAGCAC, TACCTGCGCAAAGCTGGAAG, TAGTCCGGAACAGCAAGAAG, TGCCAGCTACTGCGCCACCG	6	2530, 521, 3071, 4981, 4901, 1108	0.2705	193	0.1942	193	0	1	6	6
CDO1	ACGAGAGCGACCCCACCGAG, CGTACATTGCCCACTCGGTG, GATGCGGATCAGATCAGCCA, GTAGCATCTTCAGAAAGCAG, GTTGGGGTGAAGGACATGGC, TGCTTTCTGAAGATGCTACA	6	3841, 1399, 4149, 958, 3330, 1110	0.271	194	0.1949	194	0	1	6	6
DPF3	CCAGTCTGTGAGTCCAGGAA, CTAGTCCTGTTCTTTCGCTT, GCTCGGGGACCAGTTCTACA, GTATGTATACAGCTGGCCCG, TCTTCTCAACCCCCTCGCCA, TGGATGGAGAAGAGGCACCG	6	6422, 1119, 5209, 594, 1405, 6300	0.2732	195	0.1976	195	0	1	3	6
SMC1B	ACATTTGCAAGGATTATCCG, ACGTCAGCAAAAGAGAGCAG, GATGCAGGTGAACCTCCGGA, GCTCAGTTACCAGAGCCGTT, GCTGATTTCCTCAAAAAACT, GGAAGGGGCCAATGACCTGG	6	1125, 3117, 4204, 1115, 1599, 1903	0.2747	196	0.1993	196	0	0	6	6
ARID5B	CCCTGCCTCCAATCAAACCT, GAATGACCGTACCTTGGCAA, GTACCCGCAGACATTATGAA, GTCTCATTCTGGTTTGCCAG, TTACAGTTATGGTTATTCTT, TTGCCCCTAGAGTAGAGCAG	6	1128, 551, 1359, 1176, 2231, 6756	0.2754	197	0.2003	197	0	1	5	6
H2AFY2	AATTGGCCGGCAATGCCGCG, GCAGGTGTCATCTTTCCAGT, GCTGGCAGTTGCCAATGACG, GGGCGCCCCTGTCTACATGG, GTTCAAGTACCGGATCAGCG, TTACCGACAGTCCAAACCAA	6	3917, 922, 2550, 6679, 1793, 1137	0.2776	198	0.2022	198	0	1	5	6
SP4	ATACAAGTACAAAATCCAAG, GCAGAAGTAGTGGTGTTGGT, GTAGCTGCCAGTAAAGCCAG, GTATGACTTGAAATTGACCA, TCATCTCTACAGGATTTGCA, TTTGCCAGTGATAAACAACG	6	1139, 5996, 6596, 4465, 3924, 586	0.2781	199	0.2026	199	0	1	4	6
HGD	CCTTCGTCAATGGATTCAAA, CTTCTCTTATTGGTGCTCCG, GATCGGCTTTCACTTGTCCA, GATGTCTTTGAGGAGACCAG, GCTCAGCATAGAGATTGTAG, TCATACCTGTCCTTCTGGCA	6	1143, 4757, 1259, 5815, 643, 4085	0.2791	200	0.2039	200	0	1	5	6
MLLT1	AAAGCTCCAAGGACACCTCG, CTCTGTTTCAGGAGGAGCCG, GAGCTTGTACCGGAACTCCG, GCAAGAAGCCCACCACGGAG, GCCCTCGCCCAGCTTCCGCG, TTGCTCTCGGAGTCTTTGCG	6	7143, 5166, 6805, 823, 1158, 6593	0.2827	204	0.2085	204	0	1	2	6
ATF2	AGTTACATGTGAATTCTGCC, ATAGGCAATACAAGGACCTG, ATGACACTGTCATTACGTGC, CCAGGCGCAGTACATAGAAA, GACAGCCAAATGATCCTCGT, GTTTGATTATAGGCAATACA	6	1160, 1118, 5949, 2529, 2913, 2106	0.2832	205	0.2089	205	0	0	5	6
ASPHD2	CGTGTGGTACTGTTATCACG, GCCCTCCATCCAGAAGCCCG, GGTGGTGTCGCAGTCCCGCA, GTACTGTTATCACGTGGGCA, GTCCCGGGAGAAATAGGGCG, TCAGTCCTCGGGGGTCCCAA	6	3280, 6619, 1007, 2783, 5594, 1161	0.2834	206	0.2091	206	0	0	4	6
PARP2	CAGAGTGTACAGCCAAGGTG, GATTGCCTGAACAAGCCACC, GTGAAGGCCTTGCTGTTAAA, GTTTGGATGAGATGGGGCCG, TATTAGAAGATGATGCCCAG, TCAGCGTTCGAATTCCATGG	6	7476, 3292, 956, 1163, 3833, 4535	0.2839	207	0.21	207	0	1	5	6
MAK	AAGTTTATAGGAACACACTG, ACTGTCTCATGGTTGTGTAT, ATTCCAGATGATTTGACGAA, GGGAAAACGGAAGTTCATAG, TTAAGTTTATAGGAACACAC, TTATGTATCAAATATTGCAA	6	2188, 841, 2281, 4637, 1169, 4359	0.2854	208	0.2118	208	0	1	6	6
SHPRH	ACCACTCCACAGCTACCAGG, AGAAACGCAGTCCATCCAAG, AGATGCTCTCACTCTTCCCG, GATGGGTCTTGGAAAGACAG, GTTGAGACCCTACCAAAGAG, TGGCTCACAGAGATAAGAAG	6	4544, 807, 1679, 7110, 1184, 1966	0.2891	210	0.2169	210	0	1	5	6
IDH3B	AATTGAGGCCGAGGACGTGA, ACTTCCTGCGGGAAACATGG, CCATGCCCCAGGGTTCCCGG, CCGCGATGCAGCGTGCGCCG, GCTGATGCACGCCGTCAAGG, TCAGACCTCTCCATGCCCCA	6	2611, 948, 1187, 1218, 1760, 1423	0.2898	212	0.2179	212	0	1	6	6
TRIP11	AAGAAGTTCAAAGCTGCAGG, AAGTAATGTAAGCATCCAGA, ACAAAGGATATGCTGATGGA, ATGTTCCAGCTGTAAGGCAG, CCAGATATCAAACTTTACAA, TTACTGAGTCAAGAAAAGGT	6	2208, 1192, 1092, 1892, 5240, 4147	0.291	214	0.2189	214	0	0	5	6
SLC22A11	AAGCTCTTGGAGCAAGCCGG, CCAACATTCGTCATCTACTG, GAGAGTCCTCCAGTCCCGCA, GATGAAGGTGAGCACCTGCA, GGGAAGGTATCATGAGGCAG, TCTCCTGTGACAGGTTTGGG	6	1708, 2181, 818, 1804, 3131, 1197	0.2922	215	0.2201	215	0	1	6	6
KMT2E	ATAGCTCTGAGATTAGGCAA, ATAGTGGTTATGAGACCAGA, ATGAGGCTCGATTCATCAGG, GGATCTGTAGTTATGCGTAG, TAAAAGAAGGAAAAAAAGCG, TGGATTTCTCAACTACCACA	6	5021, 986, 6085, 1202, 3985, 3442	0.2935	216	0.221	216	0	1	4	6
P3H1	AGTCGGGGTCCAGCTCCCAC, GAGCCCCTACAACTACCTGC, GGCCGCTGCCTCCCAAGCCG, GTGTGCCGCCGACTTCCCGT, TCATTCTTAGATCAACAAGT, TCTCTTCTTCCCCAATGACG	6	791, 3298, 2375, 2699, 1204, 8317	0.2939	217	0.2216	217	0	1	5	6
POU5F1	ACCCACCAAATAGAACCCCC, CAACAATGAAAATCTTCAGG, CCCACCAAATAGAACCCCCA, TCTCTTTCGGGCCTGCACGA, TTCTCTTTCGGGCCTGCACG, TTTGGCTGAATACCTTCCCT	6	3531, 1209, 783, 7384, 5135, 3094	0.2952	220	0.2236	220	0	1	4	6
MLLT6	ATAAGTCTCCCCACGTCACG, GCAGACCTGTTACATCTGCG, GCTGTGCCCACACAAAGACG, GGAGACCTCTGAGAGCAGCA, GTGTGCCCTCTACATCCCCG, TCACATTTCCGGCAGAACCA	6	4111, 4659, 5817, 911, 3662, 1227	0.2996	224	0.2291	224	0	1	5	6
RARA	AGAGTGGTCAGAGCGCCTGG, AGATCCTGCGGATCTGCACG, CCGAAACAAGAAGAAGAAGG, GATCTGGTCGGCGATGGTGA, GTATTTGCCCAGCTGGCAGA, GTTCACTGAACTTGTCCCAG	6	6459, 1246, 1133, 4483, 3440, 1517	0.3042	228	0.2338	228	0	0	5	6
TLE1	AGACCCCCTCGTTAACCAAG, CAGGAGGCTGAAGTCCCGAA, CCGAGGGGCGGGATTCCAGG, GGAACTTGCCGAGGAGGCCG, GTACCCGCTTGGTTAACGAG, TGTACCCGCTTGGTTAACGA	6	1257, 770, 7155, 2244, 1707, 5505	0.3069	229	0.2378	229	0	1	4	6
JMJD4	CCAGAACTCATTCAGCCAGT, CCTCGGAACCAGAAGACGCA, CTGTATGTACTCTTTCCAGT, GCGCTGGCGGGGCAGAAACG, GTCGAAGTCGGGCCTCCCCG, TCCTACGCCGACTTTGTGCG	6	1710, 1258, 5093, 3112, 6818, 1101	0.3071	230	0.2381	230	0	0	4	6
SPRTN	ATATGCAGCTATGAAGGGAA, CGACGCGTCCACTAGCGACA, CTTGGCCTCAACTTCAAAAG, GGAGGAGTGGAACTTGCAGG, GGAGTGGAACTTGCAGGAGG, TCTTGGCCTCAACTTCAAAA	6	8694, 7347, 8147, 613, 1266, 7762	0.3091	231	0.2403	231	0	1	2	6
APOBEC1	AGATCACTAGAGTCACACCA, CAAAAACACCACCAATCACG, CCTCTTTACGAAGTTCTCTG, TAGAAGACGTCAAACTCCCA, TCAGGAGAAGAATCGAACCC, TCTGCTCTACGAAATCAAGT	6	1062, 4289, 1275, 6994, 3626, 5985	0.3113	232	0.2424	232	0	0	4	6
RLIM	AAGCTTCTTCTCGATCCAAT, AATCTTGGAGAGCAGTGAGT, ACAGAGGTCCCACCTACCAG, CAGAAGTCAGATGGACCGAT, GATTCCAATGACAAAGGAAG, TTTGCTGCCTCAATGTCACA	6	927, 1340, 6541, 3202, 1282, 2457	0.313	233	0.2438	233	0	1	5	6
GTF3C3	AAACTTCCCAGAGCTCTGAG, AGAGCTCTGAGAGGTCTCAT, CCGCCGTTCGAACTCCTCAA, GCTCTGGGAAGTTTACTCCG, TCTCCTTTGAGGAGTTCGAA, TTCTCAGGAGAAACATCAGA	6	8598, 926, 4152, 8989, 7805, 1284	0.3135	234	0.2446	234	0	1	3	6
GLUD1	ACAGCAACAGCGCTTCGCCC, ACCATGGAGCTAGCAAAAAA, CCGGGCCCAGCCCAGCAACG, CCTGCTCCAGACATGAGCAC, CGAGGCGGTGGCCGACCGCG, GCGCCACTACAGCGAGGCGG	6	757, 1308, 5558, 7036, 1286, 7836	0.314	235	0.245	235	0	1	3	6
H2AFY	ACAGCCAGCAGGATGTGCCG, GAGTTGCTAGCGAAGAAGCG, GCAGCGAGAGACAACAAGAA, GCAGGAGTCATCTTTCCCGT, GCCACCGCCATGTCGAGCCG, TGTCAGGTATTCCAGGACGG	6	1289, 1236, 5942, 1887, 8116, 5794	0.3147	236	0.2463	236	0	0	3	6
SUB1	CCTGTAAAGAAACAAAAGAC, CTTGTTTCTTCAAGCTCTTC, GCTCTGTTTAGAAGATGACA, TGACAGTGAGGTTGACAAAA, TGGCAGTGATTCTGACAGTG, TTTCAGGATGCCTAAATCAA	6	3320, 1295, 7282, 1252, 6410, 3670	0.3162	237	0.2487	237	0	0	4	6
RCOR1	ATTCTGGCCATTATTGGGGG, CATGGTGGAGAAGGGCCCCG, CCAGAATAAAAGTTTGGCGG, CCATTGCCAAAGAAAAGCAT, GCGGAGAGGGAGGAACAACG, GGTCGGACCCCAGTACCAGG	6	859, 4049, 3206, 1403, 1297, 2943	0.3167	238	0.2494	238	0	1	6	6
SUPT3H	CAAGTAGTGGAAGGAGTACA, CTTCATGAAGACAAATTGAG, GATGAGGATGATCTTCTCGA, GCTGAAGTTTCTCAGCTGCG, TCTACTGCAACTTCAAGTAG, TTCTCAGCTGCGGGGAGCAA	6	3892, 5909, 5291, 541, 1298, 6704	0.3169	239	0.2498	239	0	1	3	6
HMGA2	CCCTCTCCTAAGAGACCCAG, CCTCACAATTAGGAACCAAC, GCCCCAGCGCCTCAGAAGAG, GCCCTCTCCTAAGAGACCCA, GCGCCTCAGAAGAGAGGACG, TTAGGAGAGGGCTCACCGGT	6	5796, 5070, 1301, 2505, 2982, 1032	0.3176	240	0.2506	240	0	0	4	6
TRIM28	ATGAAGGAGCTGAATAAGCG, CCAGCGGGTGAAGTACACCA, GCTCTCACAAAACAGCACAA, TCTCAGGTACCAGTTCTTAG, TCTGTACGTCAGACACCTGG, TGTGTCCCCTAGAATCCGCC	6	7345, 1869, 1273, 1305, 4419, 7350	0.3186	241	0.2515	241	0	0	4	6
KLF12	AAATTCATGGGACTTGAAGG, ACAGATAACGAGTCCTCCGG, CCAGATGCAGAGGCCACAAG, CGTCAACAGTATTAACTCCA, GCACCGACTGTACCACCACG, TCATGTTCACCGCATCCCCG	6	1320, 2689, 2340, 3514, 679, 2418	0.3223	245	0.2564	245	0	1	6	6
SMAD3	CCACCAGATGAACCACAGCA, GAGCTGACACGGAGACACAT, GCGGCTCTACTACATCGGAG, GCTCTACTACATCGGAGGGG, GTAGGAGATGGAGCACCAGA, GTTCAGCTCGTAGTAGGAGA	6	6122, 1321, 6597, 561, 8110, 3222	0.3225	246	0.2567	246	0	1	3	6
TCEAL2	AAGGAGAAGGAAAGTCAGAG, CAGGGAGGATCAAAGACAGA, GAAGAACAGCCACCGCACGA, GAGGGAAAGCCAGAGAGAGG, GGAAAGTCAGAGATGCAGGG, TCTGGCTTTCCCTCGTGCGG	6	3539, 880, 1723, 8025, 1325, 2714	0.3235	247	0.2573	247	0	1	5	6
SETD3	ATTCGGTCTTGAGAATATAA, CTTACTCTGCAGCAGCTCAC, GCCTGGCCCAGGAAAAGAGT, GTATGTGCAGATCCGGACTC, GTCAGGTTCAAGATTTCCTT, TGTTACAGAATGCAGCAGTC	6	2825, 3764, 1329, 634, 4436, 2826	0.3245	248	0.2588	248	0	1	6	6
P4HA1	ACAGCGACAAAAGATCCAGA, AGCTATGCGGTATATCAGCA, AGGAAAGTACTGTCTCTGAA, GCCTTCATCCAGTTGCCTTA, GTTCCATCCACAGTTCCGTA, TGAAACGTCTGAATACTGAG	6	2239, 3439, 1146, 2799, 1344, 5438	0.3281	252	0.2634	252	0	0	5	6
CHUK	AAAGCTCCAATAATCAACAG, ACGTCTGTCTGTACCAGCAT, AGGCCTTTACAACATTGGCA, CTTATTCTCAAAGAGCTCTG, GTACCAAAAACAGAGAACGA, TGATGTGCCTCTTCTAGCAA	6	2909, 4852, 1346, 787, 4435, 3499	0.3286	253	0.2639	253	0	1	6	6
CCBL2	CATATGCTCCTACTGTCACA, GAGCTTTCACAAGTGATGGA, GGCAAACTTACAGATCTCAG, GGCCAAGATTCACAACAGAA, TGAAATTCACAAATGCAAAA, TGTGTAGGTGTATAACAGAG	6	2953, 2233, 3998, 1350, 1193, 6830	0.3296	255	0.2649	255	0	0	5	6
MAML1	AGAACTCCGCGAATAACCAG, CGATCAACAGAATGGCTACG, CTGTTGATCGCCATTCTGAG, GCATAAGAAGACTCGCCGGG, GTGTGAATAAGAGTTCCCCT, GTTAGGCTCTCCACAAGTGA	6	593, 3319, 1351, 7786, 3485, 7375	0.3298	256	0.2653	256	0	1	4	6
UTY	AATTCTTGCAGCAAGCGTAG, ACTCTGGTCAGAGCACCATG, CCTTGGCTCGACAAAAGCTG, GTATCTCCAAAAGTCTTTGG, GTCTCTAATCGACAACCACA, TGATGAGGCAAAGAAAATGG	6	1353, 3253, 984, 5810, 5288, 7845	0.3303	257	0.2659	257	0	1	3	6
SETD4	ATCAGAAGACGAAAACTCTG, CTTCCGGCTCCAAACAAACA, GGAAGTTCTGAATCAAGAGG, GGTAAGGCTTCCAAAGAGAT, TCAGCCCTCTTCCTGTACCT, TGAGAGTTGCCTGCTCACCA	6	974, 1937, 6020, 2608, 1354, 2321	0.3306	258	0.2663	258	0	1	5	6
PCGF3	AGCGGAAATGAGAAAGCAGA, CACTCACCCGATGTACTGCA, CAGCGGAAATGAGAAAGCAG, CTGCCTGGTGAAGTACCTGG, GTACCTCATCGACGCCACCA, GTGCAGACACTCGGTCACCG	6	4409, 1356, 581, 2815, 3238, 4225	0.3311	259	0.2668	259	0	1	6	6
NSD1	AAGTGGTGCCTAAAAAGCGG, ATAGTAAGACGAAGGAGCAG, CTATCGGCAGTACTACGTGG, GTAAGAGAGTTCCTTCAACT, GTATGTGAGTTACTAATGAG, GTTTGCTGCCACAAACACTA	6	5619, 7860, 2032, 2071, 1358, 664	0.3315	260	0.2674	260	0	1	4	6
TDRD7	ACAAAATCCAAAAGGATGCA, ACACTGGCCTCATATTTGCA, ACTGTTGGACACCCTTTCAA, GCCCACTGACAAAATCCAAA, GTACAAAGTGAAATTCCCTG, GTTGCTGGCCGTAAATGCCG	6	4938, 1132, 5202, 1366, 5623, 4572	0.3335	263	0.2693	263	0	0	4	6
KDM6B	CATTTCAGCTAACCAAGCCA, CCACCCCTCCCCCATCGCGA, GCAAACCATATTATGCTCCA, GCTTGGTTAGCTGAAATGGG, TCTCTAAGGTCACTTCCGGG, TTAGAGAGAGCAGAGTTCAG	6	5530, 642, 3572, 6628, 6976, 1372	0.335	266	0.2715	266	0	1	3	6
HIPK2	AAGTGTGTCATGGTGACAAA, ACAGGTCAATGAACTCCCGC, ACTGCCACCTCCAAAAACAG, GCATTATTCTGAATCATGGG, GTTATTGCAGAATTGTTCCT, TTAGGTTGTGTGGTCCGCCG	6	1380, 3427, 2089, 2225, 1113, 3430	0.3369	268	0.2739	268	0	0	6	6
NIPBL	ACTGGCTGTGGAGATCTCAA, CCTGAAACCCCAAAGCAAAA, GGAGAGAGTTACAAAATCAG, TCCCCATTACTACTCTTGCG, TGTCATTCCGAAAATCAAGA, TTTGCTTTGGAGTTTCAGGG	6	7392, 546, 7760, 7252, 1381, 3599	0.3372	269	0.2743	269	0	1	3	6
CTNNB1	AAGGTTATGCAAGGTCCCAG, CATGGAACCAGACAGAAAAG, CCACTCATACAGGACTTGGG, GCATGTTTCAGCATCTGTGA, GCCAAACGCTGGACATTAGT, TGTCTGCTCTAGTAATAAGC	6	3105, 6856, 1203, 1384, 3566, 1716	0.3379	271	0.2761	271	0	0	5	6
PIWIL4	AATGGCAAACCCAGGCCAAA, CATTCTACACACCAATGGCG, GCAGAGCTCAGGTATCAGGT, GGTGCCATCCCGCTTCTGAA, TGTCCATGTACCAAATTGGA, TTGTCAAGTGAAACTCAAAG	6	3671, 1385, 501, 4477, 3680, 3672	0.3381	272	0.2763	272	0	1	6	6
KAT2B	ACCTGTGTGGTTTCGTACCG, CCCTTGAGCAGCCAAACGCA, GCAGGCGCCCGAGCCCCCGG, GCGAGCGCGTACCTTGCAGG, GCTCCTGCCCCGCAGCCGCC, TCAGTCTAACAGAATCCTGT	6	6125, 756, 5755, 1397, 3046, 1990	0.3411	275	0.2804	275	0	1	4	6
HMGB4	AGAGGAAGAAACGGAGAAAG, AGAGTTCTCTAGAAAGTGTT, ATGTTGGCAAGAGGAAGAAA, CTAGAAAGTGTTCGGAAAAA, GAACTCTTTAAAGCCAACAT, GGCTTTGTCGAGTTTGGCCA	6	2046, 2739, 1400, 2866, 3425, 625	0.3418	276	0.2811	276	0	1	6	6
RBL1	ATACGTTCACGAAATTCTTG, CCGCAAAAGCATTATTCCCA, GATGGCAGTAAAGTCGTCCA, GCACCTTCTACCCCACTGAC, GTACTGTGTGAACTGCATGA, TCAGCAGTATGAAAATCAGA	6	4402, 2707, 2150, 2253, 822, 1414	0.3452	278	0.2859	278	0	1	6	6
UBE2B	CATGAGCCTCCTCCGGGCCG, CTGAAAACAACATCATGCAG, CTGGATTTCCAGGTTACAAG, GCATGTCGACCCCGGCCCGG, GGCTCATGCGGGATTTCAAG, TTACAAGAGGACCCACCTGT	6	3334, 1420, 1089, 3893, 5588, 2109	0.3467	279	0.2883	279	0	0	5	6
ZFPM1	ACTCACGCTTGATCTGCCGG, CCACATGGAGCAAAAGGCCA, CGTGTGCCTGATCTGCCTGT, GCACTTACTGTTGATCACTG, GTGCACACGGACACGCTGAG, TCTGGCCTCCATGTCTCCGA	6	4746, 5271, 5050, 877, 3060, 1426	0.3481	280	0.2904	280	0	1	4	6
HIF1AN	ATTTCCAGAACTTTAAGCCG, CAATAAGCTCCTCTGCCCGG, CTTTAAGCCGAGGTCCAACA, GGATATACAGCAGCGAGGAG, GGGTCGCTCTGACTCAGACG, TCTGAGTCAGAGCGACCCCC	6	3265, 4151, 2218, 4212, 1285, 1435	0.3503	284	0.293	284	0	0	6	6
CBX8	ACCATCCCTTCCATTTCACG, ATGACAAGCCCAGCTCACCG, CCGTATGCGCCGCTTCAGGA, CGCTTCTTCGAGCTGTCCCC, GAATACCTCGTGAAATGGAA, GGTCCCGAGGGGCCTCTGCG	6	6084, 3062, 1443, 4048, 2192, 1067	0.3523	285	0.2951	285	0	0	5	6
PHC2	CTGTCCCTGAAGGTACAACG, GCAGCTTGCTCCGGTCTGAG, TCAAGAAGAAGTATGCACAG, TCCTGACGCATGTTATCGAA, TGTCCCTGAAGGTACAACGT, TTTATTCTCACCATTCTGGG	6	2399, 705, 1686, 4007, 1446, 2548	0.353	286	0.2957	286	0	1	6	6
SMAP2	ATATGAGAAGAAGAAATACA, GTCTATCTGAGGTCGCCGAA, TAGGTTCCATGCCAACTGCA, TCACAGTGCATGCAAGAGAT, TCTGGAACCGGAAGAAGAAG, TGAACCTGTTTCCGGAGCCA	6	4516, 1392, 4121, 4550, 3518, 1448	0.3535	287	0.2961	287	0	0	6	6
TRERF1	GACCATCCCGTGTATCTTGA, GCAGCCTCCTTCTTATCACA, GCTGCTGTCTCAGAAGCCCA, GGAAACCATGTCCAGCTACG, GGTTGGGGCTGATAATACTG, TCGGGCAGCACCCTACCCAA	6	976, 1453, 5721, 6641, 3645, 4462	0.3547	288	0.2976	288	0	1	4	6
MXD4	ACAACGAGCTAGAAAAGCAC, ACTCACCTTGATGTGCACCT, CGCCAGGGAGAAAACAAAGG, CTTCGACGGCGACTTCGCCA, CTTTCAGACGAGCCAAACTC, GGCCGAGCACGGCTACGCCT	6	5678, 2790, 838, 1755, 2675, 1458	0.356	291	0.2987	291	0	1	5	6
ZMYND8	AGACTGACATCGGAACCAGA, CACTTAGCGTGATAAACCCG, GCAAGAGATGGAGGTTTACG, GCTGACAGTTGAGGAGAGAA, TATCCGACAAGGAAATCCGG, TCAGAAAATGAAACAGCCAG	6	1175, 1460, 6528, 2220, 4093, 6847	0.3564	292	0.2992	292	0	0	4	6
DCAF6	CACAAGAGAGAAAAGTGTAA, GCTCAGTACGAATATATGAT, GGACGGGTCCTCCAGCCCGA, GTGAAGATGGAACTGTTAGG, TCACGTCCCACAACAGGTGT, TGCGGAAGAGAGAAGAGAAG	6	2984, 4604, 1461, 5459, 921, 5811	0.3567	293	0.2996	293	0	1	4	6
MEIS1	CTTTAAAGCGTCATTGACAG, GACGATCTACCCCATTACGG, GTGCTAAGAGAGGGAAGAGG, TCAAACAGCTAATATACCGG, TCGTCTATCACCAAATCGAT, TCTGGATTAGAAGAAAATAG	6	1027, 2773, 6813, 1469, 3006, 3773	0.3586	295	0.3023	295	0	0	5	6
WNT4	CTTCGTGTACGCCATCTCTT, GCTGTGACAGGACAGTGCAT, GTACCTGGCCAAGCTGTCGT, GTCATGGACTCGGTGCGCCG, GTGTGGCCTTTGCAGTGACG, TTACAGCCAGTTGCTCGCGG	6	4697, 6339, 1481, 1510, 4365, 1462	0.3616	296	0.3065	296	0	0	5	6
NFX1	AGAAATCCACCAAAACAGGA, CTCTTAGGTTTGCTTCCTGA, GCTCTGACAACTCCACACTG, GTAGAGGACCAAAAGTCAAG, GTAGTATCTCCTTTCTCCCG, GTTGTGGGTGCAGATCCCAG	6	2553, 3831, 3460, 1293, 1483, 7674	0.3621	297	0.3073	297	0	0	5	6
MTERF1	AGTTATTTCTCATATGCCAG, CCGAGAATCTTTCAAAACGG, CGAGAATCTTTCAAAACGGT, GAGTAGATATTGACATGGCA, GCCTTTCCTTAGGACAAACA, GGGTCAATCCAACTGAGTAG	6	4805, 1490, 4128, 1327, 3241, 4532	0.3638	298	0.3093	298	0	0	6	6
PYGO1	CGATTAAAACCCATGCCCAG, CTCCAAAGCCAGGATAACCA, GAGCATACTCAGACAATGGA, GGAGCTGGAGAGTTCTCGGC, TATGGATTTGACGAAGGTAG, TATGGGGAAGACATTCTTGG	6	6481, 1499, 977, 6716, 6468, 3164	0.366	302	0.3117	302	0	1	3	6
BBOX1	AAAGGCAGAAGCACTTGACG, ACCTGGATTCCGCAAAAGCA, ACTCTTCCTCATCATACCAG, CATGGCTTGTACCATCCAAA, GTAGGCATAGTAAGACTCAC, TGTCTCTCAACCATACAGCT	6	5045, 2617, 2533, 1500, 4124, 878	0.3662	303	0.3121	303	0	1	5	6
TLK1	AAACAATCGGAATCATCCAG, AGAATGGGTGAATCAGCAAA, CAGGACCTGGAAAAGAAGGA, GCAGTAGGAGAAGGGCTATT, GCTTTGGTTGTACAATAGGG, TTTGGTTCAGAATTGGTAGA	6	1514, 6519, 871, 3104, 4916, 3905	0.3696	307	0.3159	307	0	1	5	6
MBIP	ACTTCAGTCTCCGATTAAAG, ATGCAGGCTGGAATGCCGAG, CTTTCGCTCCCTACACACCC, GAGCTTAATCGCCCGAGCAG, GATTTCGTAGAGCACCTCTC, GCTCGGGCGATTAAGCTCCG	6	6613, 3261, 3286, 1083, 5308, 1515	0.3699	308	0.3161	308	0	0	4	6
MAP3K12	ATAGTGCTCCCTGATGTCCA, CCTGCACAAGATTATCCACA, GCACCAAGATGTCCTTTGCA, GGTCCAGGATTTCCTCAAAG, TCACAGCCACCTCCTCCCCG, TCACCAGTTCCTCTTCTAGG	6	1521, 2517, 3019, 1070, 7229, 4994	0.3713	310	0.3176	310	0	0	5	6
LAS1L	CAGTATGTCGTGGGAATCCG, GCACTCCCAGAACTTCACGC, GGCCAGGTCTAGGTTCCCAG, GTACGCGCTTAACCGCATCA, GTGACGACCATAAGTTGCAG, TTGTGAATCTTATCTCAGAG	6	1019, 8728, 1523, 9016, 8648, 2905	0.3718	311	0.3178	311	0	0	3	6
UBN1	AGAGGCTCAGAAAAAAAGGG, AGCTGGTGAAGAATATCCGA, GAGCTGGTGAAGAATATCCG, TGACAACGACTTGCTCCAGG, TGATGCTTGTCTAAACTGCA, TTTGTGATCTGGTTCAAAGA	6	3137, 4792, 4267, 780, 3254, 1529	0.3733	313	0.3193	313	0	1	6	6
LOXL2	CCAGAACCTGAATATCCAGG, GACGGCCAAGAATTCCCGCG, GATCTGTGACAAGCACTGGA, GCAGAATGTTTGCCTCACGG, GTAGCGCTGCTTCCTCCGTG, TATTGTATGTCCTCTCCCCA	6	5395, 3542, 1532, 6642, 5400, 1520	0.374	314	0.3201	314	0	0	3	6
ELP4	CCAGCCCTAGACCAGCTCTT, GCAACGTCACCAGTTTCCAG, GCCAGCGTGACCAACGACAG, GTAGTGTTGCCGCGAGTACT, TGGCAGAAGGAATTGTCAAT, TTACATTTATCATCAAGTAA	6	7976, 7491, 537, 4285, 7323, 1534	0.3745	316	0.3206	316	0	1	3	6
PHF10	AGGTTATCCAGGTACCTCAA, GCAGCTTTCTTAATATACTC, GCTCGGGCTGATGGCGGCGG, GGACCCAGCCATCCAAAAGG, GGGTCGCTGTCGCACGGCCG, GTCGCTGTCGCACGGCCGCG	6	2280, 2263, 6643, 6722, 1379, 1536	0.375	317	0.3215	317	0	0	4	6
VGLL1	ACTGCCATCCGGCTGCCCAA, ATAGCATGTCTCCAAATCAG, ATAGGCTTCTGTTTGCCTTT, CTACGCTGCTGATGTCCCCT, GAAGGTGTGATGCTGAAAAA, TTTGCCTTTGGGCAGCCGGA	6	2147, 6261, 4866, 1233, 3807, 1547	0.3777	321	0.3252	321	0	0	5	6
ID3	AAGGCGCTGAGCCCGGTGCG, ATGTCGTCCAGCAAGCTCAG, CGAGGCGGTGTGCTGCCTGT, CTCCGGGTACCAGTTCCCGC, GGTGCGCGGCTGCTACGAGG, TGGCCAGACTGCGTTCCGAC	6	1550, 1277, 5843, 2562, 5527, 3000	0.3784	322	0.3263	322	0	0	4	6
PRMT3	AGTCCATTGGGGTATGAGAA, ATTGAAACATATGGAAGCCA, GTACCCTTCTCATACCCCAA, TATGTTTGCTGCTAAAGCTG, TGTCATTGCGGACCTCCAGG, TTAGCGTCAGGCGCTACCGG	6	2365, 4486, 1552, 852, 6560, 6694	0.3789	323	0.3267	323	0	1	4	6
CHD3	AGGAGAAGAAGACAAAGCGG, ATAAAACTAGGGCTTCTGGG, CATTTCATCTTCCTCCCACG, CCAGTGGCTGTGATAAACCG, CTACCACAAGACAGGCCCAG, TTATGTATCGAAACTACCAG	6	894, 3103, 3099, 3229, 6178, 1553	0.3792	324	0.3269	324	0	1	5	6
ASF1B	AAGCTGATCTCGAACCGGAA, ACTCGAAGCTGATCTCGAAC, ATATCTTTGCAGACCTGGAG, CATCCCAGAGACTGATGCCG, CGAGTGCAGTGAAGCCCTGG, GGTGTCGGTGCTGAACGTGG	6	3029, 1556, 7133, 5193, 4039, 1148	0.3799	326	0.3283	326	0	0	4	6
ZBTB33	AACTCCTTGAATGAGCAACG, GCAACTTTGAGCCAAACACA, GCACAGGTCCAATCTAACCC, TGTGCCACTGTGTTATTACT, TTCTTGTCACCAGAATCAGG, TTTGCCGAGTAATAACACAG	6	1560, 743, 3669, 2681, 3656, 4328	0.3809	327	0.3289	327	0	1	6	6
RIPK3	ACAGGGTCCGGGGAGCCAGG, AGTTCCTCGATGGACACCAA, GCACCACTTCTTTCAGCAGG, GCAGCTCAGCCAATGAAGGC, GGCCTGTCCACATTTCAGGG, GTTCCTCGATGGACACCAAG	6	8001, 730, 1563, 3548, 2142, 2403	0.3816	328	0.3293	328	0	1	5	6
SIRT2	ACTCCTGCGCTGCTACACGC, AGGATAGAGTTCCTTGGCGA, GCGAAAGTCGGGGATGCCTG, GCGCATGAAGTAGTGACAGA, GGACGAGCTGACCTTGGAAG, GTACCATCTTCCCTACCCAG	6	1566, 4652, 6137, 775, 1827, 3381	0.3823	330	0.3304	330	0	1	5	6
RNF169	CGGCAAAGCGAGTGGCCGCA, GAGTACTCGGGCCTCTTCCG, GATGACACAGACACATCGCT, GCAGCCGCTCTGAGTCGGCG, GCAGGGCCGCTGCTTCTCCG, GGAGCCCCCCGGAGAAGCAG	6	1489, 7060, 3347, 2832, 1569, 7394	0.3831	331	0.3311	331	0	0	4	6
BCAT1	AGTGCAAAGCTGATGAGCCA, CTTTGTACTCTTGAGCCCAG, GCTCAAGAGTACAAAGAGCA, GTTCACGGATCATATGCTGA, TTTCTCCCATCCAAACTCTG, TTTGTACTCTTGAGCCCAGT	6	2835, 1995, 1579, 3882, 1249, 3573	0.3855	332	0.3346	332	0	0	6	6
TAF4	AGTGTCTCAGGCCCAGACAA, GCGTCTGGATGACAGTGCCG, GCTCCCATTCAAAGTTTGCG, GCTGTCAGCCTGGTCAACAA, GTTGGCCGCTGACCCCCGCG, TCATCGGGCCAACTATGCAA	6	1581, 6155, 2119, 3491, 3173, 748	0.386	333	0.335	333	0	1	5	6
C17orf49	ATATACCTTGCGTTTCACAG, CAGCTGAGTCACCCAAGAAA, CATGACGTCAGCGTCCACAA, GGTCGGAGAGATCTTCTCGG, GTACCCCGCAGGAGAAGAGT, TGGCCGACTCTTCTCCTGCG	6	3424, 4257, 1056, 1603, 7543, 4897	0.3914	334	0.3412	334	0	0	5	6
NKX2-2	AATGACAAGGAGACCCCGGG, ACTTGGAGCTTGAGTCCTGA, AGGTCCGGAGGAAGAGAACG, CGCTGACCAACACAAAGACG, GCGCTGGCTGGCCAGCACCG, GGTCCGGAGGAAGAGAACGA	6	6076, 1313, 4615, 1605, 4813, 2665	0.3918	335	0.3416	335	0	0	5	6
WHSC1	AAGCAGGCACCAGAAATCCT, ACAACACTCTGAACAGAAAG, GGATCTGCAGAAACCATGCA, GGGTTCTCCATTAAACACCC, TCTTCCCGTTGGCACTGCCG, TGAGGAACACAGAACACTCG	6	1201, 4393, 8007, 7191, 1819, 1610	0.3931	337	0.3437	337	0	0	4	6
TBX18	AGTGGCGCAGACCTGGAGCG, CCACAGTTCGAAATGGATGG, CCAGCAATATTACATTGCCA, GCTCCCTGCAGATCCACCCG, GGGATGGCCGAGAAGCGAAG, TCTCATCCAAGTCTCCCCCG	6	4598, 1614, 4628, 4609, 627, 3080	0.394	338	0.3452	338	0	1	6	6
ZNF136	AAAGATCACTACAAACACCG, AAGATCACTACAAACACCGA, AATGAACTCAGAGAATGAAA, AGACACATCAAAGATCACAG, AGACACATCATCACACACAG, GTATATGGAGAAGTCAGCAT	6	1492, 6907, 5162, 5785, 1616, 3628	0.3945	339	0.3458	339	0	0	3	6
TDRD5	CATCGGCGAGTACCTTACCG, GCGAGTACCTTACCGAGGAA, GGTTGTATCTAAGTTCCCAG, GTAACAGAGGAAAAGCCGAG, GTAGACAATGAATTTCTAGG, TTACAGTACCACCTGCACCG	6	881, 2259, 5185, 1636, 2700, 5984	0.3994	341	0.3516	341	0	1	4	6
FLCN	CAAAAAGTCGGACATGTGCG, CCGCACTCTCTTCTGCACGG, CCGTGCAGAAGAGAGTGCGG, GCGTCGAGTCCAGCAGCCCG, GCTGCCGGTCACTTGCTGCA, TTCTTCGGAGATGAGCAGCA	6	900, 4770, 7831, 7709, 1640, 4296	0.4004	342	0.353	342	0	1	4	6
RPS6KA4	CCAGCGCCAGTACTTCAAGG, CGACGATGAGAGCTGCGCCG, GCACGAGGAGAAGGTGAGCG, GCTGAGCAAGGAGTTCCTGA, GCTGCACTACGCTTTCCAGA, TCTCTTTGACCACAACAACG	6	4816, 5732, 4801, 1889, 1641, 864	0.4006	343	0.3532	343	0	1	5	6
MED31	AAATCGACTTCGGTTTCAGT, ACTTCGGTTTCAGTTGGAGT, ATGATGCTGGAAATCGACTT, GCTGCTGTCGCTATGGAGAC, TCTTGTCTCCTAGATGATGC, TGTCTCCATAGCGACAGCAG	6	550, 8208, 1645, 8901, 2967, 6851	0.4016	344	0.3548	344	0	1	3	6
HMG20A	ATTCAGGTTAAATCACCCAG, GGAACAGTATCAGAAAACAG, GGTGCATTGCTGTCTCGAAG, GTAATGATCTGGCTACCACT, TAAAGCAGCTGCTTACCCAG, TCTTCATCTGCAAAAAGGGG	6	990, 3301, 2888, 1651, 3632, 4098	0.4031	345	0.3563	345	0	1	6	6
AICDA	ACAGCCTCTTGATGAACCGG, ACTTCCTCCGGTTCATCAAG, AGGAGGTGAACCAGGTGACG, CATGTGGCCGACTTTCTGCG, GGAGGAAGAGCAATTCCACG, GTCGTAGCAGGGGCTCCAGG	6	3490, 5020, 3540, 582, 2000, 1660	0.4053	347	0.3594	347	0	1	5	6
SS18L1	ACTCAGAGCGGCTCCAGCCA, ATCCTGGAGTACCAGAGCAA, CCTGGAGCCCTGACTCAGAG, CTGCAGGGCCAGATTGGCAA, GGATGCACTGGATCAGGTGG, GTACCAGAGCAAGGGCAAGA	6	2988, 4626, 1661, 1649, 1767, 1852	0.4055	348	0.3595	348	0	0	6	6
KDM4D	AGATAATTCCACCCAAAGAA, CATCAACTACCTGCACCTTG, CCACATGCCAAAGTACAAGT, CCTGCTGGAAAAGGAATGTG, GATTTCACTGATATTATCAT, GCAGGTCCTGAATTGTTCCC	6	4525, 1670, 3977, 2419, 1540, 3798	0.4077	349	0.3628	349	0	0	6	6
IDO2	ACCATCATCTCATTTCCTGG, CTGAGTGGACCAGGATAGGA, GCTGAGCTGCCAGTTCCTGA, GGAGACTTCGACAAATGGAA, TATCTTGCAGCCCAACCAGG, TTCCTGCCAGACATAACCCA	6	6801, 3276, 2287, 5441, 1683, 1094	0.4109	350	0.3668	350	0	0	4	6
OGDHL	CATGTCCTCAGGGATCCCCG, GCATGACATGCCCAGCCACG, GCCCACCTCAAACTCCTGCA, GTACCATTGGTCGTGTAGGA, TCTCCACCTTCAGGGCTCCG, TCTTGCCCTGGGCATCTCCA	6	3285, 4434, 2742, 917, 7590, 1685	0.4114	351	0.3675	351	0	1	5	6
CHD9	ACAGAAATAATCTCAACCCA, ATAGATATAGAGGCCATCAG, CATCCCCAAAACCAACCCAA, CCATCTTCCAAGAAGAGCGA, GAATTGCTATAATTACCCTG, GCAGAGTCAGAGGAAATCTT	6	4721, 4812, 1904, 1268, 4131, 1687	0.4119	352	0.368	352	0	0	6	6
PTPN2	AAGGAGTTACATCTTAACAC, CCATGACTATCCTCATAGAG, CCATGCCCACCACCATCGAG, CCGCGACTCACCAAGTACAG, GGAAACTTGGCCACTCTATG, TGTCATGCTGAACCGCATTG	6	7504, 3260, 2412, 2151, 1690, 1121	0.4126	354	0.3682	353	0	0	5	6
PRDM12	AGATGCCGAGGCCCTCGCCA, CGTGCTCCGGGGCGATCACG, CTTCATCGATGCCAGCCAGG, GATGTCGGAGGTGATAACCT, GCAGATGTCCACGTGCTCCG, GCCATCCTCATTGAACACCT	6	2612, 6773, 4894, 5611, 1127, 1689	0.4124	353	0.3682	354	0	0	4	6
TCEAL5	AAGAAAAGCCGGACATGGAG, AGAAAGTGAGGGAAAGCCAG, AGAATGCGAGGGAAAGCGAG, GAAAGAAACCTAGAAAGTGA, GAGGACAAGCCACAAAGTGA, GAGGGAAACCAGGAAAAGCA	6	1695, 7147, 4536, 3278, 6191, 1116	0.4138	355	0.3702	355	0	0	4	6
EP300	ATACGAGGCCCATAGCCCAT, CCTGACCCAAGTATGATCCG, GTACGACTAGGTACAGGCGA, TGAAGAGGAGGGGTTTGCCG, TGATATTGTGAAGAGCCCCA, TGGTGACTCCAGTTGCCCAA	6	7007, 1703, 4754, 1573, 7453, 3944	0.4158	358	0.373	358	0	0	4	6
ING5	AAGTTCCTCTGAAGTTCGCA, ATAGTGCTCCAAGTACATGG, GATCTGAAGGACAAGATGGA, GCGAGAGCTGGACCAGAGGA, GCTGTCTCCAGACCAGCGCG, GGCTGCAGAGTACATCTCCA	6	3218, 6975, 1369, 1704, 2670, 4980	0.416	359	0.3733	359	0	0	5	6
TCEAL8	AAAACCACAGAACATGCCAA, AAGTCTTGTGAAGAAAATGA, ACAGAACATGCCAAAGGCCG, CCTGTGGTACATCCTCCAAA, TGGCTTACGCCTTCTTCGGA, TTTGGAGGATGTACCACAGG	6	1712, 5285, 5110, 4962, 1896, 1265	0.418	360	0.3761	360	0	0	4	6
TGFB1I1	CCTCCATTCTCCTCTTCCAG, CCTGGGTGGGAACACCCCGG, CTACCACCTCGCACATGCCA, GAGGGGTGAGAGGCTCCGCA, GCTGGAAGAGGAGAATGGAG, TCATTTGTGGAGCTCACCAC	6	1312, 7996, 1714, 3949, 7964, 3912	0.4185	361	0.3767	361	0	0	4	6
HIST1H2BH	CGGCATCTCCTCCAAAGCCA, CTACTCCGTATACGTTTACA, GAAGCGTAAACGCAGCCGCA, GCATCTCCTCCAAAGCCATG, GGCATCTCCTCCAAAGCCAT	5	5916, 2056, 6402, 851, 8899	0.4326	376	0.3774	362	0	1	2	5
H3F3C	AAGCACCCCCTCTACCTGCG, ACTGCTCGTAAATCCACCGG, CAGACTGCTCGTAAATCCAC, CTGCTCGTAAATCCACCGGT, CTTCACCCCGCAGGTAGAGG, GCTTCACCCCGCAGGTAGAG	6	2989, 6742, 5301, 1720, 2779, 1485	0.4199	362	0.3786	363	0	0	4	6
MCEE	CAGCCCTTGGATCAAGTGAC, CTACATGGTTGAGTCGACCC, GAACCTGTCACTTGATCCAA, GGTTGCTTTCCAAAATGGCG, GTATTCACCTACGGCATTCG, GTTGCTTTCCAAAATGGCGC	6	2361, 2869, 1725, 3902, 1705, 4079	0.4211	363	0.38	364	0	0	6	6
OTUB1	AGAACCCTCTGGTGTCAGAG, ATGACAGCAAGGAGTTGCAG, CCAGCCGCTCTGACACCAGA, CTATCAACAGAAGATCAAGG, GCAGGACCGAATTCAGCAAG, GCGCTGTTTAAAGATGGCGG	6	1422, 5238, 2886, 7224, 2164, 1728	0.4219	364	0.3805	365	0	0	4	6
NCOA3	ATACTTGCCTGAAGTAAAAG, CATGTGATACTCCAGGACAA, GTAGAGGAGGAGACTCCAGA, GTATTGCCAGAAGATGCCAT, TGGCAGACCCTAGCACCACA, TTTGGACTCCCACGATTACG	6	6080, 6147, 7835, 4388, 1730, 1270	0.4224	365	0.3809	366	0	0	3	6
SPIN1	CAGCCTACGATGTTCCGCCG, GCAGCCTACGATGTTCCGCC, GGAATGGCCCTGTTACCCAG, GTAGGCTGCAGGATTCAGCA, TGGCCAGGTGTCTTTCCGAA, TGTGTGAATACAGAAAACAT	6	3068, 1731, 6653, 6445, 2309, 1022	0.4226	366	0.3812	367	0	0	4	6
ZFPM2	ACACACAGTCAGAGAAACCG, ACTGCAGTAGTACATCAAAT, AGTCGACAGCAACTTCCAGT, GCACAGGCTGGAAATCTGAT, GTCAGATGACTCTCACAGAA, TTTCCCCCAAGATATCACCA	6	590, 2017, 5467, 1733, 1740, 3624	0.4231	367	0.3817	368	0	1	5	6
LZTS1	AAGGTCAGCCAGAAAGCCCG, AGCTCAACCGGTATTCCGAC, GATTACACGGCACTGTCCAG, GCTGCGCTGCAGCTTCTGGA, GCTGGACATGGAGTTCCGGC, TTACACGGCACTGTCCAGCG	6	3643, 6562, 5146, 4317, 1210, 1737	0.4241	368	0.3833	369	0	0	4	6
SIN3B	AGTCCTCTGCACCGTCCCCG, CCTGGCTCTTCAGCACCCGG, CGAAGCGCTCGTCCTCACAG, GAGGCTCTCGATGATCTCCG, GCTGTCCTCCCACTGCACTT, GGAGAATTCGCACAACCACG	6	2381, 7879, 1470, 2343, 1742, 5235	0.4253	369	0.3846	370	0	0	4	6
ASZ1	AGGCGAGAGTAGCGAGAGCG, CCTACTTACAGGCTTTAACG, CTACTTACAGGCTTTAACGT, GCTAATGCAAGCTTTGAGAA, GTAGATTCCAACTTTCAGTA, TGGAGCAGAAGTTAATACCC	6	6097, 4517, 7076, 4961, 967, 1754	0.4282	373	0.3883	374	0	1	4	6
ZNF350	ACAGGAATCCATAACACTGG, ATTGAAGATGGAATCCACAG, CATGATATATTTGACTTACG, GGTCCTTCTGAGCAGCGCCC, TCACATAGACTACATCTGTG, TGTGGCTGTGGACTTCACTT	6	7042, 4865, 1404, 1909, 1769, 4878	0.4319	374	0.3932	375	0	0	5	6
CHAF1B	AGACTGAGTTTCACTCCCGA, ATATTTGCTGGGCAACTGAT, CTTCCTGGAGAAAACATAAG, GATGGCTGTGTTATCCACAG, GCTGAACAAGGAGAACTGGA, GGACGGTTGTGAAGACTCTG	6	7843, 1770, 6480, 8544, 7999, 578	0.4321	375	0.3939	376	0	1	2	6
WDR11	CCTTGAGGTGAATCAGACGG, GATACAGGTTAAATGGGCCA, GCTGGGGAAGAACATCCCAG, GGACAGCACACCATACTGAA, GGGTCTTTCCAGATGTTCAG, TTAAATGTGAGGGATCAAAA	6	6381, 1028, 4141, 4926, 2057, 1772	0.4326	377	0.3946	377	0	0	5	6
TCEAL7	AAACCCTGCAAAGAAAACGA, GTCTCTCGAAGAATTTAAAG, GTGCAGCGTGCCAAAGAGGG, TGGCGTTCAAATTCTCCATA, TTGAACGCCAGCAAACAGAA, TTTGAACGCCAGCAAACAGA	6	2423, 7302, 7129, 1774, 2346, 1348	0.4331	378	0.395	378	0	0	4	6
PHC3	AGACCATCTACATCTCCCAC, GAGTACTTCCCCTACCCTAA, GCTTCCCCTGTTGTACACAT, GGAGACACTGTTAAAGGAGA, GGAGAGCTGATGACACAAGA, GTCTTACCTGAACAGCAGCA	6	3209, 3003, 4714, 2690, 592, 1776	0.4336	379	0.3954	379	0	1	6	6
GLOD4	AGTGGGAAACCGCTTCCAGA, ATAGAACTTATATCCTCCCG, CCACTGACGGAAGTTGCAGA, GTTTCTATCGGGACGTCCTG, TGGGAAATGGAGTAAAACAA, TTTGAAACCGAGGCCCCGGG	6	6310, 1735, 1778, 2588, 5361, 4420	0.4341	380	0.3958	380	0	0	4	6
CTCFL	CAGCAGAGTGACCGTACGGA, CCATGTCCGATCCCACACTG, CTGCCTGAAAACCTTCCGTA, GTGCAAGTATGCCAGTGTGG, TCCGCAGCAGAGTGACCGTA, TTGCACATGGAACATTTAAA	6	1779, 3595, 2245, 1041, 4276, 1867	0.4343	381	0.3963	381	0	0	6	6
PEX14	AGAGCATTCCTAAAGAAGAA, CGGCTGCTCTGCCTGCTCCG, GCAGCTCCTGGACGGAGGCG, GCCCAAGGACGAAGGCTCAT, GCCTGCCATGATGATGGCCA, TCTCTCTCACCAGATTGCCA	6	4794, 5540, 4460, 657, 1786, 8978	0.436	384	0.3977	384	0	1	4	6
ELL3	ACACTCTTGCAGCGCCCGCA, AGAAGAGGCAGGACCAACCA, CTGAGCTCGCACTTACCCCT, GGGACACTATGAAGGAGAAG, GTCACTCCCAGGATCCTCAA, TGCTTTCCAAGGCCACCGAG	6	1794, 1834, 1592, 3324, 3224, 7187	0.438	385	0.4	385	0	0	5	6
THRB	AAGTGCCCAGACCTTCCAAA, ACAGCGGTAGTGATACCCGG, ATAGGAAGAGCCATTCAGAG, GAACCGGGAGAAAAGACGGC, TCATATTTACAGGAATAGGA, TGTGTGGTGACAAAGCCACC	6	1802, 3948, 5556, 2363, 579, 3466	0.4399	386	0.4035	386	0	1	5	6
BRD3	CTACTGCGACAGCATCCTCA, CTTGGGGTCTGACAACGGCG, GATGCTATCCAAGAAGCACG, GCATCCACTGGCTTGTAGAA, TCTTGGATAGCATCTCCCTG, TTATTACCCCCTGCTCCAAA	6	6850, 2512, 3041, 4170, 1805, 1476	0.4407	387	0.4043	387	0	0	5	6
ATF3	AGAACAAGCACCTCTGCCAC, AGTGACTGATTCCAGCGCAG, CCTTTGTCAAGGAAGAGCTG, GGCAGAAGCACTCACTTCCG, GGTGTCCATCACAAAAGCCG, TTTGTGATGGACACCCCGAG	6	2003, 3994, 1808, 728, 5781, 6505	0.4414	388	0.4055	388	0	1	4	6
MAZ	AACTCCTTCCCGCCACCTCA, GCAGCGTGCAAGGAAACACC, GCTCAGCCCCGACCTGCAGG, GCTGGGCCTGGACTCCCGGG, GGGAGTCCAGGCCCAGCACG, TGCTGGGCCTGGACTCCCGG	6	2311, 1734, 7128, 6251, 1825, 4113	0.4456	391	0.4108	391	0	0	4	6
KDM5B	AACCCCATGATATTCCCCAG, AATAGAACCCGAGGAGACAA, CATTTCCCCAAAAGTACGGA, CCATTTCCCCAAAAGTACGG, CCTCTCCATGATGTTCCCAA, GCAAAGTACTGGGAGTTACA	6	5360, 1673, 5256, 4658, 1828, 2912	0.4463	393	0.4119	393	0	0	4	6
H3F3B	AAAAGCGCTCCCTCTACCGG, AAAGCGCTCCCTCTACCGGC, AAGCGCTCCCTCTACCGGCG, AGCTGGCCACGAAAGCCGCC, CTGCTCGTAAGTCCACCGGT, GAAGCCTCATCGCTACAGGT	6	1833, 4743, 3393, 727, 6874, 5806	0.4475	396	0.4134	396	0	1	4	6
CPA4	CCAGGCCACTGCAATCTGGA, CCTGCATTCAGCCAAACGGC, CCTTCAGTACATACATCGGC, GATGCCTGCATTCAGCCAAA, GATTGTATCTGATTACCAGA, GCACTGGGAAAGGCGTGAGG	6	2795, 1768, 3545, 1839, 2559, 4496	0.449	397	0.4155	397	0	0	6	6
HDAC9	ATTGCTTCTCACGGACAACA, CCTCAGGATGATGATGCCCG, CCTCTATCTTTGCCTCTGAG, CCTCTCAGAGGCAAAGATAG, CTATCTTTGCCTCTGAGAGG, GGTCCCAGTTCACCAAACAA	6	3184, 4772, 2489, 1721, 1847, 2896	0.4509	399	0.4179	399	0	0	6	6
TET2	AAGTAAATGGAGACACCAAG, GGAATGACATACAGACTGCA, GGTTCTGTCTGGCAAATGGG, TGAGGCCTTTCAGAAAGCAT, TTAAGGGAAGTGAAAATAGA, TTAGTCTGTTGCCCTCAACA	6	1848, 5861, 2443, 3157, 5485, 971	0.4512	400	0.4183	400	0	1	4	6
GPT	AGACGTTGTTGGGGTCCGCA, GATGTTGGCACGGATGACCT, GCGAAGGTGCTGACGCTGGA, GGTGGATTACTACCTGGACG, TGACGATGCCAAGAAAAGGG, TGTGAAGAAGCCTTTCACCG	6	7499, 5761, 1858, 5660, 4823, 793	0.4536	402	0.421	402	0	1	3	6
PRMT8	ACTCGGGACACTTTACCTCG, CATGTTCGCTGCCAAGGCAG, CCAGTCATCACCATATTTAA, CTATGAGTCCATGCTCAACA, GCACGTGTTCAAGGACAAAG, TGCCCACTTTGGGATCCACG	6	3984, 6659, 647, 4311, 3344, 1865	0.4553	405	0.4227	405	0	1	5	6
GMNC	CTTATTTCTGTAGAGCTGAG, GAAAGAGACCCAAGTCTCCG, TCAGCTCTACAGAAATAAGC, TCTGGCCTCCTACAAAGTAC, TCTTCCGGACTTGTGCTCAT, TTCTTCTTCCTTCTGCACCA	6	3114, 5224, 4487, 4134, 1680, 1873	0.4573	407	0.4248	407	0	0	5	6
MKL2	ATAGACACCGAGGATGAAGT, CACAGCTTTGAAGAGCCCAG, CACAGGGGCGATAGACACCG, GAACACAATGGATCACACAG, GCGTAGTTAGAGTCCATCTG, TCTGTTCATGGAATGCCGCT	6	6919, 2940, 5544, 1874, 3270, 1555	0.4575	408	0.4251	408	0	0	4	6
NCR1	AGATCCAGCCACGTACAGCG, ATGTTCTTACTGCTCAAGGA, GAACTCACCGACGCAGAGCA, GCTCCTATAACAACCATGCC, GCTGTGGTCACAGGGCCCAG, TCCCGTATCCGCGCTGTACG	6	1877, 2223, 831, 2432, 5164, 4418	0.4583	409	0.4256	409	0	1	5	6
TRDMT1	CCAATAATAATACCTGACCA, CGGGTGCTGGAGCTATACAG, GCTGGAGCTATACAGCGGCG, GTATAGCTCCAGCACCCGCA, TATAGCTCCAGCACCCGCAG, TTTACCCCTTTAGGATTGGC	6	3483, 2183, 868, 5100, 1879, 4530	0.4587	410	0.4262	410	0	1	5	6
MBD2	AGGCCGCTGCCGCCACTCGG, CCTGCGCACGCCGCTCACCG, CTTTCCCGTCGGGGAGCGCG, GCGACTCCGCCATAGAGCAG, GCTTCCACCGCCCCCGGCCA, GGAGCCGGTCCCTTTCCCGT	6	923, 2704, 4160, 1884, 2124, 6367	0.46	411	0.4276	411	0	1	5	6
HIST3H2BB	AAGCAGGTGCACCCCGACAC, CATGCCAGACCCGTCCAAAT, GACGGCAAGAAGCGCAAGCG, GCCCAAGAAGGGTTCTAAAA, TGTCACCAAGGCACAGAAGA, TTAGAACCCTTCTTGGGCGC	6	8827, 1398, 7609, 6461, 1888, 6817	0.4609	412	0.4289	412	0	0	2	6
DTX3L	AGAAAAATGGAAGGTCACGA, CCTGTTCTCCAAAGAGCAGA, GTACACCCGCACGAGGAGCG, TCACAAGCAGAAACACCGTC, TGTGGATTCCTGTCTCCAAA, TGTTGATGCATATCACCAGA	6	1951, 5681, 670, 1894, 3135, 3129	0.4624	413	0.4306	413	0	1	5	6
OGFOD3	CACCGATGTCGTCATCACCA, CAGCCTCTGCACCTCCCGCG, CCTGCAGCGTAGCTGAAAAG, CCTGCTCTGGAGCAGCTTGG, GCCGCAACCAAGGCGCCCGA, TCCCTGCCACGACCTCGCCA	6	5131, 6024, 4032, 7144, 1900, 1271	0.4639	414	0.4329	414	0	0	3	6
KLF1	AGAGGACGATGAGAGGGGCG, GAAGTCTGAGGACCAGCCCG, GCGGTCAGTGTGCTGATGGA, GCTGGTCCTCAGACTTCACG, TATGCGCCCAGAGTCTCGGG, TCAGACTTCACGTGGAGGGG	6	614, 1901, 5550, 4476, 5156, 7422	0.4641	415	0.4332	415	0	1	3	6
STK3	AGTACTCCATAACAATCCAG, ATTCGTTACCTCTTAGGCGC, CGTTACCTCTTAGGCGCCGG, GGATGTATATCAGCATAAGG, TATTAGAGAAGCTTGGAGAA, TTTAATTGCGACAACTTGAC	6	1902, 5339, 6819, 4664, 772, 2672	0.4644	416	0.4336	416	0	1	4	6
PHYH	AAGTGAGAAGATGATCACGA, CAGATACTGCACTCTCCCCG, GAGCACATCAGCCGGAACAA, GTGCTCCCAGGCACACACAA, TCTCATCGTTTGCGCCTGGA, TTACAATTACCAGAATCTGG	6	4666, 1910, 4811, 2154, 6725, 947	0.4663	417	0.4367	417	0	1	5	6
MED6	AAACGCTCTCGGAATTATGG, ATGAAGTGGTCAAAATGCAG, ATGGCGGCGGTGGATATCCG, TCATCATTCGGAAGCAACAG, TTACATGTTCTGTCATAAAA, TTTCCCATAGACAATCTGCT	6	7278, 7678, 8793, 7245, 1917, 1653	0.468	418	0.4383	418	0	0	2	6
PRKD2	AATCGGTGCGACACACGACG, ATACGATGAGGCAGAAGAGG, ATTGCACCACCCTCATTAGG, CACAAGGCTGAAGTTCTGGG, GCTGTCAGAAATCCTCACGG, GGAGGCCACCGATTTCAGCG	6	711, 6869, 2796, 1918, 3995, 3188	0.4683	419	0.4387	419	0	1	5	6
EZH1	AACAGCATCACTAATCAGAA, CACTAATCAGAACGGATCCA, CCAATGCCAAGTCTGTGCAG, CCAGTAAGTGATACATTTGG, GCGTTTATATACATTAGGGG, TGCGACTTCGACAACTTAAA	6	1924, 1221, 4338, 4497, 5858, 2313	0.4697	421	0.4402	421	0	0	5	6
ATRX	AAGCTTATCGACACCATCAG, ACTATGCAGAGCTTGCCAAA, ATTATGCTGAGAAGTCAACA, CAGGATCGTCACGATCAAAG, GAGTTCAGTTGATCATCAAG, GTTTCTGTCGGTCGCCTCAA	6	6296, 1726, 7047, 1926, 6532, 7554	0.4702	423	0.4406	423	0	0	2	6
MGMT	ACAGCTCCAGCTTCCCCAAA, GACACTCACCAAGTCGCAAA, GACCTCCGAGAACCGCAGCG, GACCTTGCTGGAAAACGGGA, GATGGTGAAGAGCCGGCACG, GTGGAAATAGGCATTCAGCC	6	3203, 1927, 6746, 1724, 4062, 5244	0.4705	424	0.441	424	0	0	4	6
HIST1H2BK	CGGCATCTCCTCTAAGGCCA, CTTCTTCTGCGCCTTAGTCA	2	5364, 4119	0.6994	646	0.4414	425	0	0	1	2
AFF3	ATTGGCCTCACATACGCGGT, CTTTCTCCAGACTAACAAGG, GCGTATGTGAGGCCAATGGA, GCTCTCTGTTGGCCGTCAGA, GTAGTGCTACAGATAGACGA, GTGCACTGCACATCATACAG	6	653, 6295, 2910, 3484, 7098, 1929	0.4709	425	0.4415	426	0	1	4	6
MYCBP	CGAAGCGTGAGCAGTTCCGG, GAACTGCTCACGCTTCGAGT, GAGGTACTTGGAGAAGTCGG, GCGCCCCCCTCACTTTGTAA, GGAGGTACTTGGAGAAGTCG, GTGCTGGACACGCTGACCAA	6	5745, 2540, 4996, 1931, 4951, 1589	0.4714	426	0.4419	427	0	0	5	6
WHSC1L1	ACTATCTTCTGTTCCAACAA, ATGAAAGCAGAAAAGAAAAG, CACTGTATCAGAAAAACCAA, TCACCTAGAGACCAAATGAG, TCTCTTTCTCTTTCATGCAA, TTAGTATGAACCTCAAGCTG	6	814, 1932, 3096, 6721, 6163, 4660	0.4717	427	0.4421	428	0	1	4	6
PRDM4	CCTCGATCCCCAATACCCAT, CTGTCTTTAATGCTACCAAT, GACAGTCCGAGGGATAGGCG, GATAGGGATCTAGTGCTGAA, GGTCTGTCTCCATGACCACA, TGTCTCCTCCATCACCCAGG	6	2906, 902, 5819, 1936, 6285, 4288	0.4727	429	0.4431	430	0	1	4	6
HLCS	ACAGTGCTCTCAGAGACCCG, AGACCTCCCCCGAAAGAGAA, GGTGGCCCTGGAGCCTGCCG, GTACCAGTCCATTATCCATG, TCTCCCCCGCGAGTTCCAAA, TGGCCTATCTTTCTCAGGGA	6	1054, 2938, 6475, 1939, 2352, 7479	0.4734	430	0.4437	431	0	0	4	6
BRWD3	ACCTGAGCGGATTTGTTGCA, AGATCAGATGTTCTTCCACA, CTACCCAGATCGAAGCCGGT, CTTTCCCCTCCCAATCTAAG, GTACCCCAGGAACACTCTGA, TGTGCTGGTAAGCAGATGAA	6	2238, 3074, 661, 1949, 6028, 5371	0.4758	431	0.4458	432	0	1	4	6
ARID5A	AGGAACAGCACAGAACAGCA, ATTCCGTTCTGCTTGCCAGC, CTTCCTGTTCCCTTTGACAG, GATGGCTAAGGAGAACAGGG, GCTGTCCTGAGGCCTACAAG, TCTCTCCCCCAGTTAACCTG	6	6150, 1956, 906, 7985, 6841, 8137	0.4775	432	0.4473	433	0	1	2	6
IPO4	AGAATGTGAGGACTTCAGAG, CATTGCGTACAACTTGCGAG, CCTCAAGTCCCTGATCCTGA, GCATTGCGTACAACTTGCGA, GCTCCTCGCCTACTTGAAGT, TTACTCTGTTTCTCTCTGCA	6	1300, 4011, 4633, 3534, 2267, 1961	0.4788	433	0.4482	434	0	0	6	6
HIST1H1A	ATTAAGAGCCTGGTAAGCAA, CGATCAGCTCTGACACGGAA, GCTTCCTCCTCTAAGGAGCG, GGAACGTTGGTGCAGACAAA, GTTGAGCTTGAAGGAACCCG, TCTGACACGGAAGGGCCAGC	6	2250, 572, 4841, 6066, 4043, 1976	0.4824	436	0.4525	437	0	1	5	6
CDK2AP1	ACATACCTGGGTGTAGCCTA, ACCGTCCCTAGGCTACACCC, ACCTGGGTGTAGCCTAGGGA, CGTAGTCACTGAGCAGCTGG, CTAGGGAACTGGGAACAGCC, GGTGCCCCAAAGCAAATACG	6	1134, 5286, 4763, 2083, 5833, 1977	0.4827	437	0.4529	438	0	0	4	6
NEK2	ACATCGTTCGTTACTATGAT, CTTGCCATCCAGGAAAACAT, GCCGCTGCCAGAAGATCCGG, GTTTGGAAAGAACTTGACTA, TCCTCCGGATCTTCTGGCAG, TTTCAGATCCCGATGCAATA	6	1980, 1642, 6738, 8138, 6144, 4096	0.4834	438	0.4541	439	0	0	3	6
BCMO1	GAGCCCCTGGAAGCACACAG, GCTCATTCTCCGGATGTATG, GGGAGTCCAGATACAACCAT, GGTTGATTATCGTAAATACG, TCTCGGTGACTCCAAAGCTG, TGATTATCGTAAATACGTGG	6	2387, 4925, 1986, 4788, 8410, 1548	0.4849	439	0.4556	440	0	0	5	6
ING4	AAGTTTCTCTGTAATTCAAA, GACCTAGACCAAAGAACAGA, GGAAGCCTATGGCAAGTGCA, GGACCTAGACCAAAGAACAG, TACCATCTCATAGGTCTGCA, TTTGCTTCGAGATGGCTGCG	6	4227, 1810, 4634, 1987, 2978, 6189	0.4851	440	0.4561	441	0	0	5	6
MBD5	ATACCACTAGAAGTGGCCTG, ATAGGGTCAAGAATGCCAAG, ATTTGAGGCCCCACAACCCG, CCAGCTATACAAGTTCCTGT, CTATATGTACAAGAACTGCC, TGTACAGTCATCCTGTGCAA	6	1845, 1991, 2445, 4718, 4745, 2073	0.4861	441	0.4566	442	0	0	6	6
PPARGC1A	AGTCCTTCCTCCATGCCTGA, ATATCTTCCAGTGACCCCAA, GCAATAACTCCACCAAGAAA, GCAATCCGTCTTCATCCACA, GCTGAGTTGTGCATACAACT, TTTGTACCTTAACAATTGCA	6	3170, 1993, 855, 2362, 7613, 3744	0.4866	442	0.457	443	0	1	5	6
PADI4	AGACAGCGTGGTCTTCCGCG, GCACAACATGGACTTCTACG, TCAGCATCAACGCCTCCCCA, TCAGGGTCACCTCTACCCCA, TCATGATCCAGGGCGCCACG, TCCCCTGCAGGAGCTCCCCG	6	6081, 4654, 701, 5744, 1994, 7241	0.4868	443	0.4571	444	0	1	3	6
ZMIZ2	GAGTGGACAGACTTACCAGA, GCAAGGCGTGTACAGCCGCG, GCTGAAGGCGGCGCCAACAA, GCTTGCGTGAAGTCAGTGGA, GGCATCATGGAGCTGCCAGA, TTACATGTCACCAAACCAAG	6	1394, 5189, 2009, 6669, 2782, 4439	0.4905	444	0.4627	445	0	0	4	6
APBB1	AGGAGGAGAAGCTTCCCCCA, AGGCTGGGTAGAGATGACCG, ATTACTGGCACATCCCAACA, GCCGGGCCTCCCCCTCACAG, GGACTGAAGGAACCTGAGGA, GTGCCAGTAATAGGTCCCTG	6	2010, 3675, 5353, 7198, 6319, 1989	0.4907	445	0.463	446	0	0	3	6
AXIN2	ACACCAGGCGGAACGAAGAT, CTGTCTCTTCCAACACCAGG, GCCCAAGGAGATGACCCCCG, GCTTCCGTGAGGATGCCCCG, GGCGCAGACCGAGATCCAGT, TTTGCTGGACAAGCCAACCA	6	3871, 2061, 6079, 1442, 2015, 2468	0.4919	446	0.4645	447	0	0	5	6
P3H2	ATAGATCGAGACCTAAGAGA, ATAGGCTTTGGCACACTCCA, CCTCTACGTTCACTCCTGAA, GATCAGATATGGAGGACGAC, GCAGAACATTGAGAATTACA, GGACATCCTCATCATCTGGA	6	1530, 2161, 4738, 4863, 2016, 2634	0.4922	447	0.4647	448	0	0	6	6
MSH6	CTTCAGAGTCTGATTCCATT, GTAAGCGGCTCCTAAAGCAA, TCAGATTCCCTGGTGCAGAA, TCTTAGCCTCAAAGAAAAAG, TTATTGGAGTCAGTGAACTG, TTTATAGCCCTTCTGCACCA	6	2031, 760, 3618, 2481, 3938, 2297	0.4958	448	0.4698	450	0	1	6	6
PPP1CC	ACAGGTAGTTGCTTTCTGGT, ACATCGACAGCATTATCCAA, ATTATCCAACGGCTGCTGGA, CCACATAGTCCCCAAGAAAC, GCAAATCATAGTATTGTCCA, TATTGTCCATGGATGTCACC	6	2771, 2055, 1784, 3659, 2887, 2347	0.5017	450	0.4769	452	0	0	6	6
MED30	CAGGAGCTGGAAGATCTCCA, CCAGCTCCTGAGGAACATGC, CGCCGTGTTGACTTCCCGGG, GGACATCGTGTACCGCACCA, GGCCGCCCGGGAAGTCAACA, TCCCCGACGCGGCCAACGGA	6	8845, 1188, 2060, 8991, 6630, 8097	0.5029	452	0.478	453	0	0	2	6
MGA	CATCACCAGTAAAATCTAAA, CTATGCATCGTTACCTGCCG, GCTTCTCAGCGAAAGAGCCG, GGTCATGAAACATCAGGCAA, GGTTTGGGAGTATATGACCG, TGAGATTTAGACAAGCCTGG	6	1659, 2064, 6226, 2885, 8424, 7048	0.5039	453	0.4798	454	0	0	3	6
SMC1A	CTGCTCTTACCACAGAGCCA, CTTGCCTCTTGACTACCTGG, GCAGGAGTTTGAAGAACGGA, GCTGGCATAGGTCAATGAGG, GCTGGCGGCTGCTCTCCTGG, GTACAAGATCAACAACAAAG	6	1964, 8786, 2066, 7823, 8500, 8486	0.5044	454	0.4804	455	0	0	2	6
SKP1	AGGAGGGTCATCCTTGTGGT, CATCATCTTCAGGAGGAGGA, GCTGCATTCACATTTGGTAG, TCAGTGGTGCACCCACCACA, TGTTGTTGTAGGTCATTCAG, TTGTTCTCATCATCTTCAGG	6	7789, 8477, 2069, 1857, 6943, 5987	0.5051	455	0.4812	456	0	0	2	6
HIST1H2BG	CTTGGATGAGATGCCAGTAT, GCCTTCTTGGAACCCTTCTT, TAGCACCTTGTACACATACA, TCAGCTCCTGCTCCGAAGAA, TGGATGAGATGCCAGTATCG, TGGCATCTCATCCAAGGCCA	6	7826, 7223, 941, 2072, 6506, 7433	0.5059	456	0.4817	457	0	1	2	6
LEF1	GATGGAGGCCTCTACAACAA, GCAGTCAAATAAAGTGCCCG, GGTGTTCTCTGGCCTTGTCG, GTAGGGATATCAGGAGCTGG, GTGATCTGTCCAACACCACC, GTTTGGAGTTGACATCTGAT	6	4899, 6007, 2079, 5278, 5055, 607	0.5076	459	0.4835	460	0	1	3	6
KDM6A	AATTCGTGCTGCAAGTGCAG, TCAGCAGCAAAATCAGCCCA, TCAGCATTGGACAAAGTGCA, TGAGGAAAAGAAAATGGCGG, TTATTGGAAGATTATCCAAA, TTCCTCATCACCGAAAGCGG	6	5999, 7690, 7084, 2081, 1979, 3724	0.5081	460	0.4841	461	0	0	3	6
TRIB3	AACCCGCAGGAGCAGCCAGA, ACTTCGAGCTCGTTTCTGGA, ATAGGGCTCCAGCACGGCCA, GGAGCAGTAGGTGGGCTCAG, GTGCTGGTGACAGTGCGCCA, GTTCCCTGTCCAGGAAGAAG	6	4313, 2086, 1623, 2149, 5213, 5683	0.5093	462	0.4854	463	0	0	4	6
TAF3	CCTTTAGTGCTTAATAGCCG, GAATCAGCCGAAAAAGGCTG, TATCTGCAGCAGCTGGGCCG, TCAGCTTCAGGACTATCCAG, TCTTGAGAAGACACAATGGG, TGACTTTGTGAAATTGTTCG	6	1486, 4668, 7682, 6217, 7631, 2090	0.5103	463	0.4867	464	0	0	3	6
TAF1A	ACCTTATTCAGGCCTATAAA, ATAATTGGTGAGTACCTCTT, ATAGATGCTGGAATTCTATG, CTACATAACTCTTCACAAAA, GCTGTGGTTGAACACATCCT, GGATCGAGATGGAGCCCAAG	6	5150, 3446, 6405, 2093, 1698, 5975	0.511	464	0.4878	465	0	0	3	6
HDAC5	AGGAGATGCTGGCAGCCAAG, ATGCTGTGCAGAGAAGTCCG, GAGCCCCCCGTAGCTCCACA, TCAAAGGAGCCCACACCAGG, TCAGATCCTCACCAAGACAG, TGTGGCCACCAGCATGCGGA	6	3754, 4241, 1048, 5676, 5644, 2094	0.5112	465	0.488	466	0	0	4	6
TNKS2	ATGTCCATGCTAAAGATAAA, CCAACCATCCGAAATACAGA, CCTTCCATCTGTATTTCGGA, GTACAGCTGTTACTGCAACA, GTTCGAGGCGTGCCGCAACG, TGAGGCAGCTTCTAAGAACA	6	2099, 3936, 3720, 1574, 6999, 2438	0.5125	466	0.4888	467	0	0	5	6
NRIP1	AATCTTGCAGCACATGACAA, AGGACTGGAATGCAGCAAAG, CATCATTGTGTACTCCCTGA, GAGTAGTCCGATTTGTACTG, GCTGAATGACTGAAGCAAAG, GGATTGAGTGAAGTTATCCA	6	2103, 7086, 2647, 1459, 6752, 2312	0.5134	468	0.4899	469	0	0	4	6
GTF2A1L	CATGGCCTGCCTCAACCCGG, CTGAGGTCTTCCTTACCACC, CTTGGAAGAGTTCTACCAGC, GCATCATTAGTTATTCCTGC, TCTTCCTTACCACCGGGTTG, TGTCATGGCCTGCCTCAACC	6	2484, 3452, 7374, 2125, 1800, 4034	0.5188	470	0.4953	471	0	0	5	6
HIST1H2BF	AAAAAAGGGCTCCAAAAAGG, ACACGGAATAGCTCTCCTTG, TAGCACCTTGTACACGTACA, TCCGCTCCTGCTCCAAAAAA	4	3115, 8707, 4178, 1570	0.5638	514	0.4967	473	0	0	3	4
BRDT	ACAGATATCACAGAAACCAC, ACGTCAACAGGATTATAAAA, CTAATGAAGCCTCCTCTGAA, GATGTCTTAGGAAATACAGA, GCTCCCTGTACCACGTTCAA, TGACGTTGTCAAAAATCCGA	6	5016, 2133, 2455, 3063, 4316, 1739	0.5208	472	0.498	474	0	0	5	6
PRMT6	AACTGAAGAGGAAGATGGCG, AGTTCCGAAGGATACCCAGG, CGTTCCCGCTTAGTCCTCCG, CTCGGACGTTTCGGTCCACG, GCTGTACTACGAGTGCTACT, TCCTCCACGCGCGAACCAAG	6	3087, 960, 2153, 4606, 4078, 5092	0.5256	475	0.5038	477	0	1	5	6
VEGFA	AGATGTACTCGATCTCATCA, CCATCCAATCGAGACCCTGG, CTCCTGGAAGATGTCCACCA, GCTCTACCTCCACCATGCCA, GCTGCACCCATGGCAGAAGG, GGAGGGCAGAATCATCACGA	6	1565, 2156, 4112, 5334, 7953, 6515	0.5264	476	0.5053	478	0	0	3	6
TCEA2	ATCCGAGCTCTGCTTCCGAA, CCGCTCCCTGGCTTTGGCAT, GCACTCACGGTCCGTCTGCA, GGATGTCTGTCAACGCCCTT, GGTGTGCTACCTGGGATCCG, TGCTTCCGATGCCAAAGCCA	6	2705, 4145, 2160, 564, 5275, 3886	0.5273	477	0.5063	479	0	1	5	6
FHL2	ACCCGCAAGATGGAGTACAA, ATGAAACTCTTGGTTCCAAT, CCTGTTCGCCAACACCTGCG, GAGGAGTGTGGGAAGCCCAT, GCACTTGGATGAGTACTCGT, GGAGGAGAGCCCCTACTGCG	6	2165, 2663, 3495, 5281, 5077, 1585	0.5286	479	0.5085	481	0	0	4	6
C11orf30	AACCCTTCTGGATCTCAGCA, ATAGGGGAATTGCTACTGGT, ATCCCTGCTGAGATCCAGAA, CTGCTCTCCGAACTTCAGCA, GCAGTAATATAGTTTCTGGT, GGAGAGCAGTAAACGATGAA	6	1135, 5229, 2668, 2185, 3346, 5297	0.5334	481	0.5147	483	0	0	4	6
EDF1	ACATTCTATTACCAAGAACA, ATTTGGCCTGGGCGGCCGTA, CTGCTTGGATTTGGCCTGGG, GAGCGACTGGGACACGGTGA, GCTGCGCAAGAAGGGCCCTA, GTGACGGTGCTGCGCAAGAA	6	6570, 2186, 7154, 1334, 6184, 5927	0.5337	482	0.5153	484	0	0	2	6
SAP130	AGATTCTGAAGTCAGTGCCA, AGTCCCTCCGAAAATGAAAG, CAGTTGCTACCACAGCAGGA, CCAGTGGGTATGCAGAAGGG, GGAGCTTCTCATTTACCTCG, TGGAAACCCGAAGTGACAAC	6	2191, 1604, 8057, 6861, 5184, 7620	0.5349	484	0.5175	486	0	0	2	6
MED12L	CATGGGAGAAGACATCATGG, CCAAAACAAAGATAACCAAG, GCACTGTTCTTAGTTCAGAA, GCAGCAAGCCGTAAGCTCAG, GCTGAATGTGGTGAGCCAAA, TCACTGCCTCAACTCGGCCG	6	5883, 987, 2380, 3560, 2198, 4150	0.5366	485	0.5207	487	0	1	5	6
AASS	GGAGACTCTGAGCATCTTGG, GTTCACATCCTCCCTCCGGA, TATTGATTATGAGAAAATGG, TCTGCATCATACATGCAAAA, TGATACAGCCTTCGAATCGG, TGTGGTGAAGACCCTTGGAG	6	2200, 7517, 3959, 1099, 6690, 6114	0.5371	486	0.521	488	0	0	3	6
PIM1	AGAAGGACCGGATTTCCGAC, CCAGGTGGCCATCAAACACG, GCACCTGCCAGAAGAAGCTG, GCAGTTGTGGCAGTGCCGCA, GTGCAGGTCGTTGCAGGGCG, TCAAACACGTGGAGAAGGAC	6	4790, 4295, 2212, 1072, 7737, 3266	0.54	489	0.5235	491	0	0	5	6
SAP25	ATGAAGCCAAAGCAGGACCT, GCTTCATACTTGGGGTCCCA, GGGGCAGCAGAGGGTCCGAG, GGGGCCTTGGACAGGTACAG, TCATACAGCGGCCAGAATGA, TTTCCTCCTAGGGTTCCCGG	6	665, 2215, 7745, 3142, 4171, 5447	0.5408	490	0.5245	492	0	1	4	6
MAML3	AGATAACCATTTCCAGGCCG, ATGCAAGTAGGGTCATCGAG, CTTAATGGAGACCAGCAGAA, GTGGTTCCTCTGCTCCGCCG, TCTTTGCCCTTGCAGAACAG, TTTCTTGGCCCTCTGCTCCA	6	4748, 2216, 5269, 6235, 6360, 1797	0.541	491	0.5247	493	0	0	3	6
IDH3G	CATTGTCCGGGAGAACACAG, CCAGGTTCTAGGCGCCCACG, CGTCCGCTAAGTATGGCGGG, GCTCACCCTTCAGGGCCACG, GGCCATCCGCCGGAACCGCG, TTGTTTCGAGATTTGTGCGA	6	2229, 7303, 2549, 3007, 1390, 3455	0.5442	492	0.5285	494	0	0	5	6
PHC1	AGGCCACAATTGCTGCCAGT, AGGCTCTGCAAGCACTGCAG, GATCAATCTGGCCACCACAT, GCAGTGGGAATAGCATCCCA, GCATCAGGTGGAAGAGACAA, GGATCGGCTGATGAGCTGGG	6	5028, 2237, 1424, 7975, 4123, 6365	0.5461	494	0.5298	496	0	0	3	6
PHF3	GCATCTTCACAATAACCCAA, GGCTGTTTCTGTCATCCTGA, GGTTGTCCCATCTTACGAAG, TTAAACAATGGACTACCAAC, TTACCTTGTGCCATTAAACG, TTACTTGCAGATCCTAGCAT	6	5397, 2240, 2591, 6648, 1513, 4818	0.5469	495	0.5304	497	0	0	4	6
MAPKAPK3	CCAGGATGCAGACAATATGG, CTTGGACAACTGGTAGTCGT, GAAACAGCAGAGGAGCAGGG, GCACTTTGCCGTTCACACCC, GCTCCTGTATGACAGCCCCA, GGCTTGGGCGGTGCTCCGGG	6	4071, 2249, 636, 5044, 7195, 7733	0.5491	497	0.5332	499	0	1	3	6
SMARCAD1	ATGCTTACTGGAAATGGAGG, CTGGCATACCTCTATCAGGA, GAGGTATGCCAGAAATGCAA, GTGTGCCTGTGAGCAGCAAA, TCAGCCGTCGAAACAGACTA, TCTGGCATACCTCTATCAGG	6	2254, 4493, 5023, 6145, 3796, 2172	0.5503	498	0.5347	500	0	0	4	6
HMGB3	ACATAAGAAGAAAAACCCAG, AGGATCCTAATGCTCCCAAA, CTGCACAAAGAAGGCATAAG, GATTATGGACCAGCTAAGGG, GGTGACCCCAAGAAACCAAA, TTTCCAAGAAGTGCTCTGAG	6	759, 2791, 2258, 7376, 2701, 6309	0.5513	500	0.536	502	0	1	4	6
ZZZ3	ACAAGGAGTCAGTAGAACAG, AGATGGTTCAGGTTCTCCGG, GAGCCTGTGCCAATTCAGAA, GCAGAGTACCCGAGAATCAT, GCAGTAGTTGAAGAAATCAC, TGACTACTGAGCCAGCTACA	6	6106, 7087, 1945, 3459, 2261, 5986	0.552	501	0.537	503	0	0	3	6
JMJD8	AAGGTTCCCGGCGTGCAGCG, AGTTGTCCGTGAGTCCCTGC, CGTGCAGCGCGGCTGCCTGA, GCAGCGCTCCTCCTCCGCCA, GCAGGGACTCACGGACAACT, TCGGGCCGACCTCACCTACG	6	2266, 5734, 1607, 6052, 3289, 3111	0.5532	502	0.539	504	0	0	4	6
HINFP	ACACCAAGCTGAAACAGTGG, AGTCGGCAAGGACAACCCGG, GCTCCCACAGACACAGGAAG, GGTGCTCTCGAAGTTTACTG, GTAGCCACAGATTCTCCTTT, TGTCCTGCTCTCTTACCAAG	6	2269, 556, 5509, 8199, 3748, 3665	0.554	503	0.5392	505	0	1	4	6
TBL1X	AAATCCATCGAAGAACAGAG, ACCCTGACATCCTTACCCGG, CAGGATGGCACAGTGTTCGA, GGCCGAGATCAGTATCAACG, GTTCTCTTCCCCATTCACCG, TCAGCAGCAAGCCAGTGCGG	6	2273, 758, 4587, 2568, 5846, 4929	0.5549	504	0.5407	506	0	1	5	6
PLOD1	GCAGGATGAAGCTCTGCCCA, GCTCCTGAAGAAGTTCCGGC, GCTGGAGACCAAGTATCCGG, GGTTCTGGAAGATACGGCAG, GTGGCCACTAAGGAGACCGA, GTTTCGAAGGTCCAGAAGCG	6	6828, 5064, 4057, 1821, 2274, 5091	0.5552	505	0.5411	507	0	0	3	6
ZHX1	ATTGCATTCGACACAAACAT, TCTACAGGTGTAAGCACAGG, TCTTGCCTCCTCTACTTCCT, TGCTCAAGCAAAATATACAG, TGGTGTTAGTTGGACTCCCG, TTCCTACACACATTTCCACA	6	3780, 3762, 2277, 2606, 6615, 1232	0.5559	506	0.5418	508	0	0	5	6
SCML2	ACTTTCTTCTTACCTAGTGG, AGTACATCTTCTGTACAAAG, ATACTGAAGTGGCATTGCGA, ATCTTACCACTAGTTCCTGG, GCAGATGTAGAACATATCAC, GGAGATGTATTACAACCCCC	6	2290, 4468, 1306, 6917, 3810, 2972	0.5591	509	0.5468	511	0	0	5	6
CENPO	AGTGGTAAACTGACCAGCCG, CCACAAAATAGGAATCCAAT, GCGTCTGCGAGATGAGCTGA, TGATGCAGACACAAACTCCT, TGTAGAACCCAACCAAACAG, TTTACGGGATCTGCTCACTT	6	1465, 2296, 5030, 8478, 7749, 3382	0.5605	510	0.5484	512	0	0	3	6
NIT2	AATGTGGAGAAACTATCACC, CGCTTGTAGCTTCATCCGGG, CTATCCCTGAAGAGGATGCT, GAAGCTGGATGAGGGCCAAG, GAAGCTTTCTGAAGTAGCAA, TTTGTTCTCAGCTTTCCGCT	6	6885, 674, 3212, 7354, 4210, 2299	0.5613	511	0.5494	513	0	1	4	6
CHD1L	ATAAACTGCTGGCCTCTGAG, ATACTGGGAGAAACAAAAGA, CCTTGCCTGCAGCAGAAGGA, GGGAGAAAAGTAAAACCCGA, GTATATCATATCATACCTGG, TCATACCTGGAGGTCAGCAT	6	6127, 790, 2306, 7452, 6757, 4977	0.563	513	0.5513	515	0	1	3	6
TYW5	ATTACCTAAGCCAAGTTGGA, CCTCCAGCCGGGGTACCGGG, CGAGAAACGCCCTCCAGCCG, GTTTCCAGAATTCTTCAAAG, TCTTCCCTCCAACTTGGCTT, TTAGAATTCTTACCTTTCTA	6	4584, 7595, 3857, 2723, 2167, 2316	0.5654	515	0.5536	516	0	0	5	6
CHMP1A	ACGAAGGTGTGAACTGGCTT, GACAGCTGTGACTATGAAGG, GCCATCCGCAAGAAGAACGA, GGAGAAGCTGGCCAAGAAGG, GGTGACCAAGAATATGGCCC, TGGAGGCCACTGCGTCTACG	6	6334, 7757, 6682, 8198, 1881, 2318	0.5659	517	0.5541	518	0	0	2	6
ALDH3A2	ATTATCAGCACCACTCCCAG, GCATAAAATCAATTTCCCCA, GCGCGAGAAGGATATCCTGA, TCCCAGTTCAAGAGTCACAG, TTACCTGGTCTAAATACTGA, TTTCTATACGGGAAACACTG	6	3612, 2327, 3374, 5838, 6260, 1762	0.5681	518	0.5564	519	0	0	4	6
AIP	AGTGCCGCTGGCCCTCCAGG, CCAGCCCCTCATCTTCCACA, CGTGTGATACAGGAAGGCCG, GGTCCTGCTGGTACGTGCCA, TATCATCGCAAGACTCCGGG, TCACCTTCAGCATCTCCATG	6	846, 2785, 3822, 4200, 2328, 2892	0.5684	519	0.5565	520	0	1	6	6
KMT2C	AGAGGTGCAGGTGTCAACAA, CATCCAATCAGAGCATTCAA, CCAAGGCCAAGGATTTCAGA, CTAGTGACCACTCCACACAA, GTAGACGTAGGGGTACTGGG, TTACACCTGTAACAAATCAG	6	5121, 4180, 1287, 2342, 3858, 5707	0.5718	521	0.5606	522	0	0	4	6
APPL1	ACTTCATCATCACCTCCCAA, AGTTGTATCAAGCTATGCAT, GCATTGTTAGAACCTCTACT, GCTTGCATGTACCCAAGTAG, GGCCTCCTGCTACATCCCCA, GTTCTGTGTCAGTGTTCGCA	6	2476, 2353, 4322, 1180, 3790, 2590	0.5745	522	0.5629	523	0	0	6	6
ELL2	AGAAAGAATGACCCAGGCAG, CCAGTTCCAAGGACTCCACG, CGAGACTTACCAGAGCCACA, GATACAGTGAAATAGACAGA, GCAGCAGCACCATCTCTCAG, GCTATGGGCTGTCGTGCGGA	6	6394, 1798, 5289, 2359, 5304, 3149	0.5759	523	0.5642	524	0	0	3	6
PLOD3	ACACGGCCAGAAACACCCGG, GATCTTTCAGAACCTCAACG, GCTTCTGCTGGCCCGAGTGG, GGAGAAATACGCTGACCGGG, TCAGCCTCCGACCGGCCCCG, TGGCCACAGCTGAAACCGAG	6	6005, 2364, 5828, 573, 3825, 5733	0.5771	524	0.5657	525	0	1	3	6
CBX2	AAGAGAGGCAAGAGGCCGAG, AGGAGAACATCCTGGACCCG, CTTGCTCAGGATGCACTCGG, GAGTACCTGGTCAAGTGGCG, GCGTCCTCACTTCTTCTGGA, GCTTTGCAGACATAACAGCT	6	5207, 6346, 7178, 4321, 2366, 1854	0.5776	525	0.5668	526	0	0	3	6
ASPH	CATGCATGCAGCCAAAGCAA, CGTAAGAATGCCAAGAGCAG, CTTCCGTTATAACTTATCAG, GCACCTCTGATAAGTTATAA, GCTCTTGGCATTCTTACGCT, TCTGACCTCTCCGGGCCCCG	6	3718, 1124, 4761, 3880, 6809, 2370	0.5786	526	0.5676	527	0	0	5	6
RBPMS	AAAAGCAGATAGAGCTCCCG, ACCGGGAAGATGAACAACGG, GCGGAATTTCAGGATCGAAG, TCAAAACTGACAAAACCTAC, TCCCGAGGTTTGATATCCAG, TGACAGTCGCTCAGAAGCAG	6	3824, 2566, 6606, 1509, 2371, 2960	0.5789	527	0.5679	528	0	0	5	6
ZNF224	AGAACATCAGAGAATCCATA, AGGACATCAAGCATTCCACA, GATGAAGACAGCAATCCAAA, GGAAGTGGAAAGTATCCCTG, TATTCATCAGAGAGTCCACA, TCACACGTATCACATCGGAA	6	596, 2376, 6227, 5282, 3432, 5477	0.5801	528	0.5703	529	0	1	3	6
USP49	ATAGATGCAAACATGTAGGG, CTAAGCAGCACCACTTCTGA, GCTAAGAAGCTCCCTCCTGG, GCTGTCCTTGAGAAATGACA, GGAGGTGGCTGAGCACCTGG, GGGCGTGGTCCTCAATATAG	6	5270, 3770, 5911, 2377, 4843, 1608	0.5803	529	0.5705	530	0	0	4	6
KIAA2026	AATTTCTCCAATTTAATCCG, AGAGAAACCAAGGAGTCCAG, ATAACTGTGCTGAAAAACTG, CATGTACCTCAACAAGGCGT, GCATTTCTACCTGTGGAAGG, TCTTTCTCCAGGATATCCAG	6	2378, 7474, 5036, 4699, 1978, 4412	0.5806	530	0.5709	531	0	0	4	6
NAP1L3	AAACCCTAAAGAAAACCCAG, ACAAGCCTCTGTATGATAGG, AGAATGTGAATGGAATTCAG, CCGCTTGTATAGAAAGAAGA, CTAAGGGAGGCATTTCACTA, TGAAACCGCCTATCATACAG	6	7116, 2385, 5970, 2382, 3058, 3756	0.5823	531	0.5725	532	0	0	4	6
MTA2	ACATGTGGAAAACCACAGAC, AGAGGAATCAAAGCAGCCAG, ATGTCGACCCTGGTACCCCA, GATATCTGTCTCATTCAAGA, GATCAGGGCGAGATTAGAGT, TGTCCTGTACCGTATGTGGG	6	1367, 2395, 2478, 2416, 2386, 3594	0.5825	532	0.5726	533	0	0	6	6
SLC22A25	AGACCAGTGCATCCTCCAGT, AGATGAATGAGCTTCCACTG, ATTCGCATACCAGATCCCAC, CTATCCCTGACAATGACCCT, GACCTCCTAGATCAAGTTGG, TGGGATGGAGATTCTCAGGA	6	2948, 3360, 3314, 2406, 797, 4847	0.5874	534	0.5769	535	0	1	6	6
OAT	ACAGACCCAACCAGTTACGA, AGTGCGGGCAGATCATTATA, ATTGCTGATGAAATACAGAC, GATTGGCCAGAACTGGTAGA, TTCATGGTAGAACCAATTCA, TTCTCTCCTGATAGGAGTGG	6	6729, 1950, 7071, 8454, 2411, 4018	0.5886	535	0.5781	536	0	0	3	6
CSNK2A2	AACTGGTTCGAAAACTTGGT, ACCATTTGGCACCTACCACG, CCGCGAGTACTGGGACTACG, GCTCCTCAGACTGTTCACCT, GTTCACCTCGGCGTAGACCC, TGACACTGTAAAGGACCCCG	6	2408, 2882, 2414, 5655, 6782, 5182	0.5894	536	0.5789	537	0	0	3	6
CDY1	GACGTGACAAAGGGTCCCGG, TGCTGGCAGCAAATAACTTG	2	4993, 6180	0.8058	730	0.5802	539	0	0	1	2
SHMT1	AGATTCAAAGAAGATGGACG, CATCAACTATGACCAGCTGG, CTTGTCTGTCATGAACCCAT, GAACGGGGCGTATCTCATGG, TCAGGTGGCCCCCATCCGGA, TGGCAGTGTTCAAATGGGGA	6	7886, 5363, 1711, 5006, 2427, 4220	0.5925	539	0.5814	541	0	0	3	6
MAPK11	CCTCCCGCAGTACATCCACT, GCAGAACGTACCGGGAGCTG, GCTGAAGTCCTCGATGGACG, GCTTCTGGACGTCTTCACGC, GGTGGATGATCCCGGCCGAG, TCTGCCCCGCCCCTACCAGA	6	2431, 6133, 5413, 3034, 4003, 2202	0.5935	540	0.5827	542	0	0	4	6
NAB2	ACAGCCGAGCAGCCGCCGGG, GATCTTCCGGAGCTTCCCAA, GCAGGGGGAGGAGTCCCTGA, GCGCTGTCCCCTCCGCCCGG, GCTTCTCTCCAAGTTCAAGG, GTACCATCTCTGGCTCCAGT	6	7572, 1796, 2433, 5464, 5716, 5227	0.594	541	0.583	543	0	0	2	6
CBX5	ACATGGGAAAGAAAACCAAG, AGAAGTCAGAAAGTAACAAG, GAAGGTGCTAGACAGGCGCG, GGGTGAAAATAATAAACCCA, GTTACTTTCTGACTTCTCCC, TTACTTTCTGACTTCTCCCT	6	5717, 1472, 2435, 3132, 4490, 4006	0.5945	542	0.5834	544	0	0	5	6
KCTD1	CTTTCCATCTCCAACAACAT, GCAGGGGATCTAGTGATCAG, GCATCTCCACTGAACAACCA, GGTTGTTCAGTGGAGATGCA, GTTGTTCAGTGGAGATGCAG, TGTGGCCGCCCACATCAATG	6	2436, 5376, 3186, 2322, 5186, 3174	0.5947	543	0.5837	545	0	0	4	6
KDM5D	CCCCTTCCTGAAATCCCCAG, CTATTGTGTCTTCTCCCACG, GCTGAATTCCAAGACCCGCT, GCTTATCATCTTCATCCCCA, GTGAAGGATGAGCAAAGTGG, TAAAGATTCCCAATGTGGAG	6	2511, 3759, 3049, 2441, 3861, 602	0.5959	544	0.5845	546	0	1	6	6
TBX20	AGGCTGGTCAGCTCACCCAG, ATTGCCGCGCTCATGTCGAG, GCCGCCGCTCGACATGAGCG, GCCGCGCTCATGTCGAGCGG, GGGTAGCCCAACTTACCCAG, GGTACCTCTTGTTGTCCACA	6	2893, 6419, 2447, 7714, 4092, 1355	0.5974	545	0.5856	547	0	0	4	6
PRKCA	ACTGCGGATTTAGTGTGGAG, AGATTTCTACAGACAGTCGT, CTAATCCCTATGGATCCAAA, GCGGATTTACCTAAAGGCTG, GCTCCACACTAAATCCGCAG, GTAAAGGACTCATTCCACTG	6	2456, 5402, 740, 5172, 4791, 4337	0.5996	547	0.5884	549	0	1	4	6
RPS6KA5	CTGAAGGTCCTAGGAACTGG, GCCGTCCGCGCTGGTCCCCG, TACCTTGTGGAGATGTTCGA, TCACTGTCAAGCACGAGCTG, TGCCCTCGAACATCTCCACA, TGGCACCAGATATTGTCAGA	6	3996, 4352, 4312, 5003, 1362, 2459	0.6003	548	0.5892	550	0	0	5	6
AJUBA	ACATACTGACCTCAGAGGGG, ACTTGTTGCAAACAATGCAT, CAGACATACTGACCTCAGAG, CCAGACATACTGACCTCAGA, GGATGGCATCCCCTTCACAG, TGGAGAAGTCCACTGTGAAG	6	6088, 1417, 2462, 4545, 7312, 5687	0.6011	549	0.5899	551	0	0	3	6
PRKCB	AATGTGCCTGTGCCACCAGA, CATCCAGGCCCACATCGACA, CTGAAGTTCAGAAATCCCAA, GGGCTGCTTGAAGAAGCGGG, GTGAGGCCAATGAAGAACTG, TTAAACTTGTGTTTGCTGCG	6	662, 2567, 4500, 5358, 4413, 2463	0.6013	550	0.5905	552	0	1	5	6
IWS1	ATCCCGTTCATCCTGTACTG, ATGGACTCGGAATATTACAG, CTTTCTGAGTCACTGATACG, GCTGTAATATTCCGAGTCCA, GTCAGATGATGACAGCGACA, TCAATCTCAGAATCACTGGC	6	7113, 6094, 2464, 5992, 1302, 4895	0.6016	551	0.5907	553	0	0	3	6
PAPOLB	ATAGAAACCCTCAGGCCCTT, GAAGACCCCGAAGGGCCTGA, GCGCCGCCGCCGAATCGCTA, GGAGGAAGTGAAAGATTTAA, TCCTCTTCGAAGACCCCGAA, TGCTAAACTGAAACTACAGG	6	2898, 3372, 1668, 6700, 2465, 5129	0.6018	552	0.5908	554	0	0	4	6
TRIM32	GCATTCTAGCACTTCCCGGA, GTATGGGCATGAGGAGCGCA, GTTATGTGAGCCCTGCCGGG, TGAGAAGTCCAATAGTCAAG, TGATACAGCTGGGCTCAGCG, TTACCTGCTTAACATTGCAG	6	7741, 2855, 4950, 5127, 1021, 2477	0.6047	555	0.594	557	0	0	4	6
NFATC4	ACAGACTCCTCTGCTCCCAA, ACATGGAGAGGCAGGCCGCG, ATCGGAGAAGAAGCTCCACG, CCACATGGAGAGGCAGGCCG, GCATCCCTCAGAAGACACGG, GGCCCACCCCAGCCTCCCCG	6	3364, 946, 2479, 5737, 5201, 7584	0.6052	556	0.5944	558	0	1	3	6
MED1	ACACAACTCACCACACACCA, CCAACCAACACCTTTCCGGG, GCACTGCTATTTCCTCAACA, GGATAAGAGGAACTCGGCCA, GGGTTGTGATGAGTTCTGGA, TGAGTGATCAGTTCATACAG	6	3489, 4254, 1195, 5302, 2480, 6779	0.6055	557	0.5948	559	0	0	4	6
PHF19	AATTATCTTCGAAAGTCACG, CTACCTCGGGAAGATCAAGA, CTTGATGTCCAAACTGACGG, GTTGTTCTTGACCTTCGCCA, TTACCCTCTTGATCTTCCCG, TTGATGTCCAAACTGACGGA	6	2482, 5134, 6033, 5895, 4346, 2268	0.606	558	0.595	560	0	0	3	6
PPP1R13L	ATCGAGCTGGAGCTGTACCG, CAAAGTGCCCGACGGCCCCG, GCACTCTCTGATCGTCCGAA, GGAGAGACCTTGTAATTGCG, GGGGACCCTCGGCTGCCGAA, TCGGCCGTGCGCCCTCCCCG	6	1984, 6016, 3337, 2485, 3448, 7819	0.6067	559	0.5955	561	0	0	4	6
JMJD1C	AATCCTACAGAAAATCCTAA, ACAGAGTAATGCCCTTGCAG, AGATGAAGAGAAGATGAAGG, CCTGCCTTCTCATTATTATG, TGGCATGTGGAGAAAAGCAG, TGGTGTGGACCACTAGTCAG	6	1240, 4228, 5117, 2491, 7770, 4373	0.6082	560	0.5969	562	0	0	4	6
DLC1	AAAAGGCTGTCCCATCCAGT, ACTAGTAGCTGACAGCTTGC, AGAACATGTGACCCACTGGA, AGTTTCACCAGCTATTCCCC, TCTGATCCATGACAGCAGTC, TTACGATCATCAGAATTAAA	6	1364, 2636, 2495, 2573, 5526, 5452	0.6091	562	0.598	564	0	0	4	6
ACTL6B	AGATGAAGTCCCCTGCCAGA, ATGCCAGCTTTGCAAACGGG, GCACCCAGTGCTCATGTCCG, GCAGCGGGCACTATGAGCGG, GCTGTAGGTGTGATCCAGGA, TTACTCATGCCATTCTTGAG	6	3180, 3603, 6957, 4193, 2028, 2504	0.6113	564	0.6007	566	0	0	5	6
TMLHE	AGCTTCTTAGAAACCAACGA, AGGCTTCAGGACTTGCTGAA, AGTTGTAGCACGATGCTGAG, CCAAGTCTCTGACTTGTGCT, CCAGCAAGCCCAAGTTCCAT, TTCCCCTTAAAAGGGCCAGA	6	7398, 2514, 3359, 2899, 736, 3511	0.6138	565	0.6028	567	0	1	5	6
JADE1	AGATGAATACACCATGGAGA, CTTGGGCCTGATGAACATGA, GATGTCTGCCAGTCTCCTGA, GGAATCCTCAAGGTACCAGA, TCAATGACATGGATGCTGCA, TGAACTAGATGAATACACCA	6	4838, 2516, 5458, 4376, 547, 3863	0.6143	566	0.6036	568	0	1	5	6
BAZ1B	AGAAGATGACACGAGCCCCA, GATGTTCAGGAGGAAAGCGA, GCCCACCTGCCAAGAAACCA, GCTCACTGTACCTTTCCAAG, TGAATGGACAGAAATCCACA, TGTACCCCCAGAATTCCGTG	6	3457, 1036, 2518, 6880, 5609, 6616	0.6147	567	0.6044	569	0	0	3	6
HAT1	CTTTAGATGCATATTCAACA, GGTAGAATATAAGAGTGCAG, GTATACCCATCAACTCTTTG, GTATGAAGTAAGGTTCCGAA, GTGTTTGTGCAAAATCCAGG, TCAGTTCTCAGTCCAACAGG	6	2520, 6624, 3119, 2860, 2405, 5920	0.6152	568	0.6049	570	0	0	4	6
POLR1D	AATAGAAGAACTGCTTAAGG, CAAAGAACTTACCAACCCAT, CTGCTTAAGGAGGCAAAACG, GCAAGAGGACACTTCATCCT, GCTGAAACAATGGGACCCAT, TGGTCTTGCTCTTTATGAGA	6	2521, 4593, 5784, 2650, 5196, 2110	0.6155	569	0.6052	571	0	0	4	6
PHYHD1	ACAGACTATTTCTTGAGCAG, CTACCTTCTGGAGCTGCGAG, GAGCCCCTCGCAGCTCCAGA, GCACCAGGAATCCATCCTGT, TCACCTTCACCGCCAAAGTG, TGTTGATGGATTTCTCCGGA	6	5148, 4855, 5199, 2525, 3410, 1801	0.6165	570	0.6062	572	0	0	4	6
ENY2	AACCAAAAGTTGATAGAAAC, AGAGCTAAATTAATTGAATG, CTCCAGTTTCTATCAACTTT, TAGAAACTGGAGAAAGAGAA, TAGCTCTCAGCAACTCTTTG, TGGCTGGAAGGATCAGTTGA	6	768, 7197, 2532, 7402, 8108, 8375	0.6182	571	0.6083	573	0	1	2	6
ARHGAP35	ACGCCAACATTTCAGCCCCA, AGTGTGACGAAGGTGTTGAG, CTGAGGTCTCCACAACCTGG, GAGCAGAAACAAATGCCAGA, TCAGCACCAGTGACTTTGGA, TCTGGGACCGAGAAGGAAAA	6	708, 4834, 3926, 2534, 5268, 4601	0.6187	572	0.6089	574	0	1	5	6
PPP1CA	CATCCCCTCCCTCACCTCCG, CATCGTAGAAACCATAGATG, CCACATAGTCCCCCAGAAAG, CTGCGACTATTTGAGTATGG, GAGAACTTCTTCCTGCTCCG, GAGCAACTACCTCTTTCTGG	6	3969, 2571, 910, 2542, 5176, 4810	0.6206	573	0.6121	575	0	1	5	6
MKRN1	CACAACATCAGGAGCAGGAG, CCTGTATTCATTTCAACAAG, GAGACTTGAGGAAGCAGCAA, GGACTAAACAGGTCACCTGC, GGGATAAACAGTAATGGCGG, TGTGGGATAAACAGTAATGG	6	5776, 2168, 6113, 6662, 4491, 2558	0.6245	574	0.6155	576	0	0	3	6
SMARCA1	CGAATCTGATAATCTCTCAG, CTTCTTCTCGCCCTTCTCCG, GAAGGGCGAGAAGAAGAAGG, GATAGTGGCGGTCGCATCCG, GTAAGGCCCACAGTTCATGC, TGTGAGGTCCAGGAATATTT	6	3523, 5607, 7774, 2560, 4186, 892	0.625	575	0.6162	577	0	1	4	6
EYA4	ACTCAGTCCCCATTACAGAG, CCAGCCATCAAGACAGAGAG, GCTGCCTCAGTTACAGCCCA, GCTGGTGTAGAAAGAATGTG, GTTACTACAAATGGGACAGG, TGATAAGTAGAGGTTGAAGA	6	2586, 2752, 5534, 950, 4814, 3288	0.6313	576	0.6239	578	0	1	5	6
ATF7IP	ACTAGAGGCTATATCATCAG, ACTAGAGGTGGGATCACCAG, GAGGCAGCATCACTAGAGGA, GCTAGAGGTGGGATCACCAG, TCCGGCATCCAGATCACCAG, TGTTTCTTTAGGTTATACAG	6	5771, 5411, 3734, 566, 2592, 5561	0.6328	577	0.6258	579	0	1	3	6
SNAI2	CTGGGCGTGGAATGGAGCAG, GAAAGAGGAGAGAGGCCATT, GAGTAACTCTCATAGAGATA, GTAACTCTCATAGAGATACG, TTCCACGCCCAGCTACCCAA, TTCTTGACCAGGAAGGAGCG	6	7014, 2595, 2957, 4968, 2976, 694	0.6335	578	0.6272	580	0	1	5	6
JTB	AAGCACAGAGCAACCAGCAG, ACTCCGCTACAGCCAAGCAG, AGAAATAGATACTCACAGCC, CCATGCTTGCGGGTGCCGGG, GGGAGGCCTGGCCTCCCCCA, TGACAGCTTCTCTTCCTGCA	6	3480, 3127, 5867, 5613, 2601, 2011	0.635	579	0.6288	581	0	0	4	6
MPHOSPH8	AGTGTCCTCAGCCTTTCTCG, GCAGGTTGCGGAGGGAGCAA, GGAGCCCGAGATTCACCTGG, GTATCTGCCCAAACGCCAAA, TCGCTGGAAAGGCTATACAT, TCTGAAAAAGAAAAAAGCAA	6	6229, 7450, 3148, 834, 6870, 2609	0.637	582	0.6309	584	0	1	3	6
ZNF274	AGTGACCTCGAGGCAGCAGG, AGTGAGCAGGTCCAACAGCA, GATACTCCCCGCTTACCTCA, GCACCCAGAGAACTGCCAAG, GCCTGGATCTGGGCATTCCG, GGTCCTCACACTGAACCAGG	6	6352, 2610, 5663, 3776, 5779, 1059	0.6372	583	0.6312	585	0	0	3	6
PARP4	ACATCCAGAAAAAGAAAGCG, AGTTCCCAGAGGCATCCTGG, ATATCTGCAAGACATCCACT, CCTCCATGCCATCATCCAGG, GGAGGTGGTGTGATGTCCAG, GGTGTGCAAAGAACAGACGT	6	2633, 2187, 3335, 5322, 4784, 2616	0.6387	584	0.6325	586	0	0	5	6
EGLN3	ACAGGGCACGATGTACTCCA, CAAGCAGCTGCACTGCACCG, GCAAATACTACGTCAAGGAG, GCCTGTCGATGAGGGACAGG, GGACCTGGAGAAAATTGCCC, TCTGCGGGCGAGATGCCCCT	6	2448, 4271, 5354, 2618, 4153, 3028	0.6392	585	0.6331	587	0	0	5	6
UHRF2	CTAAAGTAAAGAAAGCTCCG, GCTCCTGTCGTGTATGTGGT, GCTTCTGATGGACAGTCACG, GGCAAAACTCCACTGAAGAA, TAAAGTAAAGAAAGCTCCGA, TTAGGTGGACTATTAGAACA	6	3091, 2623, 7308, 3167, 6408, 1638	0.6404	586	0.6347	588	0	0	4	6
TDRD6	AGAGTCCATACAAAGCACAA, AGGTATACCGGGGTTCCACG, GCTGACACCAGAAATAGCCA, GCTGGAGCGCTATCTCACAG, GCTGGCAATAAAATGTCCAA, TCGCTTAGCCAAACAAGCAA	6	7005, 2629, 4451, 5917, 7324, 848	0.6418	587	0.6364	589	0	1	3	6
ALKBH6	ACAACCTGCTCCACTCTGAA, CTCCACTCTGAACGGTTCCA, CTTCATCTCCAAAGAAGAGG, GGGAGAAAGTTACAGAACTG, GGTGGGCTTCCTCATCCCCG, GTGGGCTTCCTCATCCCCGA	6	2292, 3774, 5081, 3555, 5147, 2630	0.6421	588	0.6366	590	0	0	4	6
HDAC11	ACAGCATGCTGGTGGAGGCG, ACAGGAGGAACCATAATGGT, GCGAGGCTGGGCCATCAACG, GCGTGTGGAGGGCATCTCCA, TCCTCCTGTCTGGGTCCGAA, TTTCTGTTTGAGCGTGTGGA	6	7685, 2732, 2639, 2849, 1149, 5022	0.6443	591	0.6386	593	0	0	4	6
KAT6A	ACAGCTCAAGAAAAGCCCTG, AGTTCAACAAGAAAACCAAA, ATTGGTGGCGAGCTTGACCG, TCACCCTCACTGTAGCGACG, TTATATGTAGACAATCAGGA, TTTGGCATACGGGTGAGTGG	6	7250, 2643, 1985, 7963, 7039, 4781	0.6453	592	0.6398	594	0	0	3	6
CHD5	CCGCTGCCCGAGATCCCAAA, CGTTCTCCCGAATCACCGAG, CTACGTGGTCACCTACACGG, CTGCTTGTCGAACTTGACCG, GCAGCTGGAGCTGTACCACA, GGAACACTCACAGTACAGCG	6	2213, 6835, 7988, 2645, 5903, 4597	0.6458	593	0.6402	595	0	0	3	6
BRD8	ATAGATTCTGCCTCCCCAGG, GCACTGGCCCCACAGAGCCA, GCTACAGATGCTGCATACCA, GTAACTTACCTGATGCAGCA, TCAAGAGCTCTGACAGCAGA, TCTAAGGGTGCAGAGCCTGG	6	2648, 8131, 8508, 4620, 1823, 4803	0.6465	594	0.6411	596	0	0	4	6
TAF1	ACATGGGGCCCATCAAACTC, GCATTCCTAGTCATGCTAGA, GGAAAAGTAAAGATCGGCCA, GGATCAAGTGTCAAAACAGG, GGGAGGATGTCAAACACAAA, GTCCGTGTCTGACATGATGG	6	6439, 2652, 5451, 7646, 7349, 1906	0.6475	595	0.6421	597	0	0	2	6
TOP1MT	AATGAAGACGAGACAGCGGG, GCAGCTGGACGTGCTCCACG, GCAGGAAATGAGAAGGAGGA, GCTCCGATAACACCGTCACG, GGGCTGCTGTTCCCTCCGCG, TCATGAATACACAACAAAGG	6	6370, 1812, 5595, 5155, 4889, 2653	0.6477	596	0.6426	598	0	0	3	6
SMARCA2	ACTACAACAGACCATCTGGT, CTCCCAGTCCTACTACACCG, GCTCTTGCAGAATTTCCACG, TCGATGGTATACATGACAAG, TGGTCTGTTGTAGTTAACAA, TTTGATGCATGCCTTCCTGT	6	5703, 4226, 1156, 2669, 4985, 3199	0.6516	599	0.647	601	0	0	5	6
MED13L	ACACTCAGCCCTCAGCCACG, ATACACCAGGACAGAAACTA, ATATGATGATGATTTCCCTG, GCAGGTTAGCTTGCAGACAG, GCTCTTCCATCCTTCCCAAG, GTAATACATCATGAACTGCA	6	3162, 1393, 2676, 5128, 6351, 3419	0.6533	600	0.6493	602	0	0	4	6
SATB2	AGAGCTGTGAGAATACCCCA, ATAGACATCTTGTAGCATGT, GCATCTGTCACATAACTGAG, GCTCTGGCTTAACTGCTCTG, GCTGGGGAGAAAGAAGACCA, TGTGTCGTGGAGCAGTTGGA	6	2680, 3947, 3191, 862, 8639, 3627	0.6543	601	0.6505	603	0	1	5	6
TRIM22	AGAGATGTCTGTGAGCACCA, AGTCAGTGATCATCTCAAGA, CATAGTTGAGAGAGTCAAAG, CCAAACATTCCGCATAAACG, GTCTCCTCCTGCCTTCCAGG, TCAGACAAGAGAGAACCGCC	6	3200, 5426, 3084, 4329, 2682, 617	0.6548	602	0.6515	604	0	1	5	6
SSRP1	CCAGAATGTGTTGTCAAAGG, CGAATGTCATAACGACCACG, CTACGTCCCACCCACCCAGG, GGGGAAGCCTCACCTCAACA, GTTCAACGACGTCTATCAGG, TCAGGAGGTGAAAGGTTCCA	6	8226, 7234, 1818, 7413, 2683, 6484	0.655	603	0.6518	605	0	0	2	6
PLD6	AAGAACAGCGCCTCGCGCCG, ACGCTGGTGCAGCAACTGCA, GAGCTGGCCGAGCTCCCCGA, GGAGCTGGCCGAGCTCCCCG, GGTGCAGCAACTGCACGGCG, GTCTCAGGTGACCTGTACCG	6	4031, 4410, 970, 7176, 2684, 3784	0.6553	604	0.6523	606	0	1	5	6
SP100	AGGATGTTCACGGAAGACCA, GCACTTCAAAAGAAATAAGG, GCAGCCTGTCATCTACACCC, GCATGAGATGGGGAACCCGA, TGATGAGATCACGATCACGG, TTATCTGTTCTGTTTCACAG	6	5043, 2686, 5398, 3610, 2248, 4213	0.6558	605	0.6527	607	0	0	4	6
GLUD2	CCTGCTCCAGACATGAACAC, CGAGTTGGTGGCCGACCGCG, GCAGCGCTTTGGCCAGGTAG, GGCCAGGTAGCGGTACATCG, GGCCCAGCAACGCGGCCGAG, GGGCTCCGCGGCCAACCACT	6	4498, 524, 5078, 4115, 3648, 2687	0.656	606	0.6532	608	0	1	5	6
FBL	ACCAGATCCACATCAAACCG, CCAGATCCACATCAAACCGG, CTCCATAAACTGATTCCCCA, CTCGGCCTCCACGACCACCA, GCTGCTAGCTTGGAGCGGAA, TTCCTCCCCGACCACGACCC	6	5116, 8962, 6196, 2688, 5976, 716	0.6562	607	0.6533	609	0	1	2	6
EYA3	AACATGACTAGCAAGAACCG, ACAAAGATGGACTTGTAGAA, AGCAGCAACCACATACCAGT, GGATGAGCGAGGGATGTAAT, GTGTTCTTACCTGCACTACA, TATAATCATTGGATGAGCGA	6	2702, 2931, 5646, 2574, 2839, 4724	0.6597	608	0.6577	610	0	0	5	6
OIP5	CCTCAGCCCCCAGCCCTGCG, CCTCGCCGCTCGGCCCCGCA, CGTTGTGCAACGCCGCCCCG, GCACTCACTGGAGAAGACCA, GGAGAAGACCACGGCCCCGA, TGGAGAAGACCACGGCCCCG	6	8611, 2708, 1905, 9012, 9056, 9036	0.6611	609	0.659	611	0	0	2	6
MAML2	AGAGTGTTAGTCTTTCGCAG, ATGTCTGCTGACCAAAAGAA, CCTTCTGTCTTTCAGCTCCA, GATCCATCAGTTGTTCTCCA, GGTGGCCTCCAAATAAACAA, TGTGAAGGACGATATGAACG	6	2711, 3840, 1911, 3305, 2797, 6567	0.6619	611	0.6596	613	0	0	5	6
CUL4B	ATCAAACCCTACAAACTCCA, GCAAAAACTGAAAGAAGCAG, GCTGTTAGCAAAGCTAGAGA, GCTTCTTCTGTATCGGTACG, GTTTGATGCGAAGATGGCTG, TGGCATCCTTACCAAATGGA	6	4187, 2721, 4269, 7017, 735, 3997	0.6643	613	0.6623	615	0	1	5	6
KIAA0101	ACTAAAGCAGACAGTGTTCC, AGAACCAAGCACCTTTCTGG, CTTCTTGTTTGAACATGGTG, GTTCCAGGCACTTACAGAAA, TGATGTCGAATTAGTGGCAG, TGTCGAATTAGTGGCAGAGG	6	2730, 5115, 5688, 600, 3691, 5625	0.6665	614	0.6644	616	0	1	3	6
HSBP1	ACAGCCGTCCCTTACCACCG, ACCATGTCTGACCAGATCAT, CACCGAGGTGAGGTCCTGCA, CGTCCCTTACCACCGAGGTG, CGTGCAGGACCTCACCTCGG, GACCGTGCAGGACCTCACCT	6	3356, 5355, 2731, 5357, 7403, 1898	0.6667	615	0.6647	617	0	0	3	6
HDAC7	AGACTCACCAGTCAGCAGCG, AGTCCTTAATGACCACCGAG, CCCAGTACTCACCAGCGCCG, GCTCCCCCGGGGCAGCACCG, GGTCAAGCAGAAGCTAGCGG, GTTACCTGTAGGGAATGCCG	6	1577, 2745, 4425, 6535, 6590, 8455	0.6702	617	0.6679	619	0	0	3	6
TTF1	AGACTGTTCATTCACCAGGG, GGAGTCTCTGAAAATTTCGT, GTGGGATTCTGACTGAGGCA, TCAGTCAGAATCCCACCAGG, TGGCTTTCTGTGGGTCCAGG, TTGAGACTGTTCATTCACCA	6	2749, 4440, 6726, 7892, 4827, 1216	0.6711	618	0.6696	620	0	0	4	6
PER1	CGACTGCCGCCAGAGCGCCG, CTTACGTGCGTACTTTGTGG, GATGTGCTCCAGCTCCTCCA, GCTCTCAGTGGTCTCCAGCA, GCTCTGAGCTGGCACTCAGG, TCTGCAATCAGCAGGCAGCA	6	2755, 6075, 4802, 6210, 1558, 3458	0.6726	619	0.6712	621	0	0	4	6
NFRKB	AGACGGACACTTTAACCCCG, AGTATTGTACTCACACCCGA, GCACTGTCTTCAGGAAACTG, GCCGGTACTTGACCACCTCG, GCGCTACTTGAAGGTCTTAA, GGTGACGTAGGCAGGCCGGT	6	7513, 2756, 3205, 3207, 2255, 7834	0.6729	620	0.6714	622	0	0	4	6
PARP14	AGTTCTTCCAGGATAAAGCA, GACCAGATAGTGAAGAGAGA, GCACAATCAGCACAACGCCA, GGAGCGGATATGAGGCCCCG, GTTGTGCTGATTGTGCAGCA, TGTCTAATCCACCATCAAGA	6	3471, 2761, 2048, 4881, 5995, 4280	0.6741	622	0.6726	624	0	0	5	6
SNCA	GCAGCAGGAAAGACAAAAGA, GCTGCTGAGAAAACCAAACA, GGACTTTCAAAGGCCAAGGA, GTAGGCTCCAAAACCAAGGA, TCTTTGGTCTTCTCAGCCAC, TGTAGGCTCCAAAACCAAGG	6	2762, 5730, 4235, 6181, 2230, 3589	0.6743	623	0.6727	625	0	0	4	6
TAF9B	AATCACAGAGTATGAACCAA, AGTTTGCTCACATCTCTTGG, CTGTGATTCCCATATCCTTC, GCACAGATCCTGAAGGATAT, GCATCTCTCGGAGCGTTCTT, GGTGATGGCACAGATCCTGA	6	6236, 6010, 2589, 4130, 4692, 2763	0.6746	624	0.6731	626	0	0	4	6
NCOA6	ACAGGCTGCTGAAATCCCTG, GATGACACATTTCCACCCGG, GCACAATGACTGCAAACCAA, GGCAAGACCATCCTTAGCCA, GGGGGAGCTAAAGATCCTGA, GGGGTATCATAACAGTGGCA	6	4218, 6811, 5038, 1264, 5018, 2772	0.6768	625	0.6764	627	0	0	3	6
MAEL	AAGCGCTGTTCACAATGAGG, ATTATAGGTGAAATTCCACG, GACAAAGCTGACATATCTGG, GATTTATTCATCCCAACCCA, TAACACAGCCAATTTCACAA, TTACTGCTCCTCAGACTGGG	6	7640, 2114, 4475, 4335, 3728, 2775	0.6775	626	0.6769	628	0	0	5	6
PCF11	ATAATTGGTGACCTAGACTT, CCCCAAAGAGAAGAGATAGG, CTAGACGTATTCACATTGGG, GGAGCTTTAACTGCCATAGG, TATGCTGACCATTCTAGCCG, TGGCTTATCCTGTTCAGACG	6	2780, 3916, 3714, 4553, 5072, 2420	0.6787	627	0.6776	629	0	0	5	6
SAP18	AGGGGGCCTTCACCTTCTCG, CGAATGGACGAGTTCTCCCG, GGAGTCGCGCGTTACCCAGG, TAGTGCTCATGCTCGCTGCA, TGAAGACCCGTAGCAACAGT, TTCACCTTCTCGCGGTCGAT	6	7708, 8625, 7806, 2793, 8411, 2308	0.6819	629	0.6802	631	0	0	2	6
ZCWPW1	CTCTGGGGAACTGATCCCCG, CTTAGATGTCCTTATCTCAG, GATCAGTTCCCCAGAGACAG, GCAAGCAGAGAAGAAAGAAA, GGAACAGGAGAAAAAAAGAA, TTAGGGGAGTTAGGGCTACA	6	5767, 4387, 2802, 6491, 5682, 1678	0.6841	630	0.682	632	0	0	3	6
ETHE1	AGCCTGTAATGTGGTCCGCG, AGTGAATACCCACTGCCACG, CTGTACTGAGGGTCGCCCGG, GCTGACTTACACATTGAGGA, GGGTGACAGAGAGTCCCGGG, TTGATCAGCTGGGCATCCCG	6	3752, 5440, 2804, 3667, 7177, 1408	0.6846	631	0.6824	633	0	0	4	6
ABT1	AGAAGGTTGCGGACGTGCAG, CAGCTGCCGGAGGAAAAAAG, CTACACCAAGGACTACACCG, GCAGGAGGAATCCGAAGAAG, GCTCGTGTCAGTCAACATGG, GGAATCGGAGAAGGCCGCAA	6	8654, 6104, 6582, 2275, 4619, 2811	0.6863	632	0.6843	634	0	0	3	6
HMGN4	AGCCACAGAGGAGATCAGCT, AGGTGAAGGATGAGCCACAG, AGGTGATAAAGCAAAGGTGA, ATGCCCAAGAGAAAGGCAAA, TGCTAAAGGTGATAAAGCAA, TGCTACCATGCCCAAGAGAA	6	749, 4686, 4682, 6399, 5783, 2817	0.6877	634	0.686	636	0	1	4	6
TDRD9	AGAAATCCTTGTGTACCAGC, GCAGTGTGACATGCATCCCA, GCTCTCTCCTCATCTCCTGG, GGCCCCATGGATAATCACCA, GTCCTACCTTTCGAACGCAG, TCAATGTCACTCAGACCAGG	6	5735, 2821, 6658, 3630, 2738, 3598	0.6887	636	0.6871	638	0	0	4	6
PRDM9	CCTCTTACCTTGCTGCCTAG, GAGCCCTGAAAAGTCCCAAG, GCAAATTTACTGAATGCAAG, GGAACAGCGTAAACACCAGA, GTATGGGGATGAATACGGCC, TAGTCTTGAGTGCTGTCCAG	6	5888, 7581, 2563, 5648, 2824, 7379	0.6895	638	0.6879	640	0	0	2	6
GTF2E2	CCAAAATTGAAGTAATAGAT, GGAAGCTCTGGATATAAGTT, TCATTTGCAGATCATAGCAA, TCCAAGCCTGTTGAGAGAAA, TGATAGACACGGCATCAGCG, TTATCTCTCACGTTGTACTT	6	4231, 1539, 2831, 7508, 6886, 3654	0.6912	639	0.6903	641	0	0	4	6
CENPM	CAAGTGCATGGGCCGAGTGT, CACCAGGCAAGTCCCACACT, CTGCTCTCCCCGCAGGTGGA, GCAAGTGCATGGGCCGAGTG, GGCCGAGTGTGGGACTTGCC, TGCCAGACCTTGAGCACACC	6	4019, 4164, 4580, 3113, 2833, 1177	0.6917	640	0.6909	642	0	0	6	6
TCEAL3	AAAGCCAGAGAGCCAGCCGC, AAGAAAAGCCAGACGTGGAG, ACTGGAAGATGAGGGAAGCC, AGAATGCGAGGGAAAGAGAG, CAAAGCCAGAGAGCCAGCCG, GAGGGAAGCCAGGAAAAGCA	6	3785, 2856, 650, 7447, 7655, 7465	0.6973	643	0.6951	645	0	1	3	6
N4BP2L2	AGAAAAAGAAACGTAATGAA, ATAACATCTGGTCTATTACC, CCAGGCATCTCATCATGCAA, CTAAATGGTATAAATGACAG, GTGACCATCATTGATGTCAG, TCGTCTGCGGATACTAATGG	6	3563, 2128, 4398, 2861, 4749, 3537	0.6985	644	0.6958	646	0	0	6	6
ARL2BP	AAATTCTGCATCAGAGGCGG, ACTGCGATGGACGCCTTAGA, ATCAAATTCTGCATCAGAGG, CTTACGTATTCATTAAAAAT, TATTTAGAGGACATTATCAT, TGCTGTGGTTGGATATTTAG	6	3318, 3072, 4022, 1014, 6820, 2870	0.7007	647	0.6976	648	0	0	5	6
WDR61	AGAGAGCTGGATGCAGCAAT, ATTCTCTTCAAACAAGAGCA, CCATTTGGTCAGTTGCTTGG, CCTGTTGAAGGCGTGATGAG, GACCTACAGTGGAGTCTGGA, GCTGGATGCAGCAATGGGCA	6	8736, 8439, 6739, 8919, 2883, 2302	0.7039	651	0.7007	652	0	0	2	6
RFX5	AATGGTTTAGAGAACCCAGA, CCGTGCAGAACAAAGTAGAG, GCTAAGAGCCCCAAGACTGG, GGTTTAGATGACCGTTCCCG, TGTCAGTGTGCTCTTCCAGG, TTTAGGTCAAGTCCAGGCAG	6	2884, 2173, 4278, 6361, 4512, 6382	0.7041	652	0.701	653	0	0	4	6
HEY2	AGTGCCTAACAGAAGTTGCG, CATGGACGAGACCATCGACG, GGAGCGAGAACAATTACTCG, GGGGAGCGAGAACAATTACT, TCAGCACTTGCGCCACCCAG, TGCGCGGTACCTGAGCTCCG	6	6652, 8408, 2904, 1427, 5788, 6015	0.709	653	0.7044	654	0	0	2	6
MTDH	ACAACCGCATCATTTCCTGT, CCACCAGGATCACCCAGCCG, GCGGGCGCCGGCGCAAGCCG, GCTCGGTGCGCAGAAAGCCT, GCTGGGCTACGGCTGGGCCG, TTATTCTTCTTGGAACCAAC	6	3721, 5013, 5575, 3145, 2059, 2919	0.7126	656	0.7068	657	0	0	4	6
HUWE1	AGTTGATCTCCCGAGAGCCG, GCACTCTGTTTGAATGCCCG, GCATCTGTACAGTTCCATAG, GCATGATTAGACCTTGGGGG, GCTGATGATGTGTTTCAGGG, GGTTGACTTGAGGTTCCCGG	6	1851, 6131, 2921, 4986, 6526, 5849	0.7131	657	0.7072	658	0	0	3	6
PRDM13	CTTCCTGCACCACGAACACG, GCTATTGCAGACTTACCCGG, GTACCTTTCTCGTCGTGAGT, TCACGGCGACCCCTACCGGG, TGAAAGCTGAGCGCACGCCG, TTAACCCTATCCACTCCAGA	6	2655, 6607, 3878, 2936, 4511, 3743	0.7168	659	0.7109	660	0	0	5	6
KCNIP3	ACGGTGCGCCACCAGCCAGA, CCTCAGACTCACCTCCCTGA, GATGAACAGCAGCACCACCA, GATGCCGAACTGCTTGAGGA, GCGCAGTTCTTCCCTCAGGG, GGAGCTGTGCGCCATGGCCG	6	3066, 2941, 2765, 3064, 6146, 5294	0.718	661	0.7121	662	0	0	4	6
ZBTB16	AGAACCCTAGCCACCCCACG, GCAGAACCCTAGCCACCCCA, GGAGTTCCACGCCCACCGGA, TCTTCACCTCAGCCACCCCA, TCTTGAGGTACCGAGCCTTG, TGCTGGACTCGGCTGCCCCA	6	5203, 3685, 2955, 3338, 1853, 4960	0.7214	662	0.7149	663	0	0	5	6
LRWD1	CCATGGGCCCCCTCTCGGCG, GCGCGGCTGCTAATGCAGCG, GCTGGGTCTCGAGGTCCTGG, GGAGGCTGAGAAGGCCCAGG, GGAGGGCAACCCCTTCCTGA, TGACCTGTCTAACAACCACC	6	2963, 6437, 7994, 7351, 6689, 1669	0.7234	663	0.7162	664	0	0	2	6
NFE2	AATCTGGGTGGATTGAGCAG, AGTTGGGCATGAGTGAGTAG, ATATGTAGAGATGTACCCAG, GCTCTGCTGGGGAGGACACG, GCTGAATCTCTTGAGCTGGA, TCCCCAGCAGAGCAGGAACA	6	5474, 3507, 2964, 3353, 2339, 4305	0.7236	664	0.7164	665	0	0	5	6
CENPB	ACTGCCCTCCGAGGGCACCG, CCAAGGACTGGGCAGCCAAG, GAAGTCACGGATCATCCAGG, GAGAATCCGGACCTGCGCAA, GAGTTGGCGGTGTAGTCGCA, TCTCCCTACGACAAGCTCGA	6	3255, 5816, 1421, 6423, 2965, 8574	0.7239	665	0.7167	666	0	0	3	6
KDM4E	ACAGGTCCAGAATTGTTCCC, ATAAAAAGAAGAAAGCCATG, ATATCAGCACCATAAATTGG, CATAAATTGGTGGATTACCG, CCACATGCCAAAGTACAGGT, GGTTGGGTAAAACGTCATGA	6	1507, 6684, 3130, 2971, 6462, 4909	0.7253	667	0.7183	668	0	0	4	6
MTF1	ACATTCCGACTGCAGAGTGA, ACCCACCAGAAGACTCACCG, CTTCATCCTCCAAAGTGCCA, GATCATGAAGCAATGTCCCA, GCACATTCGAACTCATACAG, GTCCTGCTCAATAAGAACAG	6	7321, 4292, 2977, 4888, 7914, 837	0.7268	668	0.7197	669	0	1	4	6
PRDM6	CAGCAACTCTTCCCTCACGG, CCTGGCCTACGGCATCTGCG, CGCAGGTTGCGACATGTGCG, CGGCGCGCTCAGGAGACCCG, CTGAAGCCCGGAGACCCCGG, GCGCTTCCGCTGCAGCGCAG	6	3211, 3281, 1055, 3193, 3710, 2981	0.7278	669	0.7205	670	0	0	6	6
ZNF85	AATGCCTGGACACTGCACAG, GCCACATCCCTAAATGTCAA, GGCCATAGAATTCTCTCTGA, TAGAATTCTCTCTGAAGGAG, TCAGGGACCATTGACATTTA, TCTGAAGGAGTGGCAATGCC	6	8604, 7560, 7180, 4702, 1811, 2983	0.7283	670	0.7209	671	0	0	3	6
BASP1	AAGCTCAGCAAGAAGAAGAA, GAGCCCGCCGAGGCCAAGGA, GCGGAGCCCGAGAAGACGGA, GGACGCCGAGGGCAAGGCCG, GGAGAAAGACAAGAAGGCCG, GGAGGGCGAGAAGGACGCGG	6	4054, 4529, 2986, 7044, 6674, 700	0.729	671	0.7213	672	0	1	4	6
MUC1	CCTCACCTGTAAGCACTGTG, CTGCAGCTCTTGGTAGTAGT, GAACCCGTAACAACTGTTGC, GCATTCTTCTCAGTAGAGCT, GGTCATGCAAGCTCTACCCC, TTTCACCACCACCATGACAC	6	4433, 2991, 4571, 1788, 5653, 3443	0.7302	672	0.7222	673	0	0	5	6
E2F1	ATAGCGTGACTTCTCCCCCG, CACAGGTGTGAAATCCCCGG, CCACAGGTGTGAAATCCCCG, GCAGCAGGTCAGGGTCGCAG, GCCGGCTCCCACCGGCCCCG, GGAGATGATGACGATCTGCG	6	4332, 4174, 7794, 4537, 2994, 2040	0.731	673	0.7228	674	0	0	5	6
BRD2	GCTGCAGTAACAGCAAGGAG, GTGTAGGTATTGCAGCTGGT, TGACAGTGCTGAGGTCCATG, TTAATAGTACCCATGTCCAT, TTAGGCTCAAGACTCCCAGG, TTTGGGATTGGACACCTCCG	6	2891, 6177, 7635, 3668, 7364, 2999	0.7322	674	0.7242	675	0	0	3	6
SRA1	CCACTTCCGCTTGGCCAGCG, CCGCCATCTCCACTTCCGCT, GCGCTCGCTGCTTACCAAGA, GGAGCCTTACTTGAAGGAGG, GGCGCTCGCTGCTTACCAAG, TCCGCAGGCAACAAGGAACG	6	3008, 1706, 4688, 3506, 4972, 3746	0.7344	675	0.7266	676	0	0	6	6
HDAC4	CTTACCCGTACCAGTAGCGA, GCAACTGCAGATGAACAAGG, GCAGCCGGAGAGCCACCCGG, GCAGCTCTCCCGGCAGCACG, GCAGTGGTTCAGATTCCGGT, GTCGACCTCCTATAACCACC	6	5377, 3257, 3011, 6395, 4922, 2881	0.7351	676	0.7272	677	0	0	4	6
PARP3	AGAGAAGCGCATAATCCGCG, GAGGGCCCTGAGAAGAAGAA, GGAGGCCCTGAAAGGCCCCA, GTGGACATGTTGGATCCACG, GTTAGTGATGAGCTTCTGCG, TGCTTGCTCAGCTTTCCCAG	6	5821, 3013, 5500, 5597, 3797, 2217	0.7356	677	0.7276	678	0	0	3	6
ADI1	ACGACGCCCCGGGCGACCCG, AGGAGTAGTTCCTCTCTCTT, CCAGGCCCACTGGGCGGCCG, CTAGATTAAGATGTTCTACG, GCTCGGGGTGCTCTACTGGA, GCTGCTCCAGGCCCACTGGG	6	3478, 2063, 3015, 4795, 7859, 5079	0.7361	678	0.7281	679	0	0	4	6
SCG2	AATCTGTCTTCCAAGAGCTG, AGAAGACTGGAACCCAGTAG, CAGAGATGAGGAAAATTAAA, GAAAATAGAGAGTCAAACCC, GAAAGAACCAGACCTCAGGT, TATGTATGAAGAGAATTCCA	6	3017, 3876, 5101, 6211, 2460, 6985	0.7366	679	0.7286	680	0	0	3	6
PTGS2	AAGTTCATCCCTGATCCCCA, CCACACTCATACATACACCT, GATGATTGCCCGACTCCCTT, TACTCACCTTTGACACCCAA, TCAAGACAGATCATAAGCGA, TCCCACCCATGTCAAAACCG	6	3322, 1775, 3918, 3018, 5151, 4023	0.7368	680	0.7287	681	0	0	5	6
OGFOD2	CAACACCATGAACAACTACG, CATCGCGAGTTCCTACCACC, GAGCAATCGGACATGCCTAA, GCCACAGTCAGGGTACAGCA, GCGCTGTGAAAACAGGCACC, GGGTACAGCAGGGCCATCAG	6	4364, 1662, 3036, 4906, 3955, 7146	0.7412	682	0.7337	683	0	0	5	6
USP22	CCCAGGTGCGAGCAGCCCGG, CTACATCTATGACAAAGACA, GATGTCCTCACTGTTTCAGG, GCCATTGATCTGATGTACGG, GCTCACCTCCTGAAACAGTG, TGGGGCTCTGCATCTCACAG	6	7858, 5983, 6737, 1891, 3042, 7359	0.7427	683	0.7352	684	0	0	2	6
ALDH7A1	GAAAGAGCTGGGGCTCCGCG, GCCAATAGCAAGAGTCCGAC, GGGCTCCGCGAGGAAAACGA, TCAATCAGCCCCAGTATGCG, TCCAACCATACACTGCCACA, TCTTTCAGCCACGCATACTG	6	6478, 4797, 3047, 6042, 4917, 2922	0.7439	684	0.7357	685	0	0	4	6
SPEN	CGCAAGGCATGAGTTCCAGG, GCAGATTTATGGAGCTCACA, GCAGCATCTAGAGAGAAAAG, GGGAATAGCGAAAAACCGCC, GGTACACAGGGATATCTACA, TCAGCACTAGAGAAGACCAC	6	3051, 4340, 6503, 3510, 2344, 6325	0.7449	685	0.736	686	0	0	4	6
CDK19	ACGGTCACGTCTACAAGGCG, AGGATTTGTTTGAGTACGAA, CGCCTTGTAGACGTGACCGT, GAAGGGTGCAAAGTGGGACG, GTCACGTCTACAAGGCGAGG, TTTCAAGGCGAAGCTGGCGG	6	3617, 3053, 3081, 3967, 2575, 7202	0.7454	686	0.7368	687	0	0	5	6
SFMBT1	ACATGTTTAAAAGACCCATA, ATACTCACGCCCTCTAGCAG, ATATGCTGTGGAAATGAACG, ATTCTGCTCACACCACCCAA, GGAGAACATGAAGCTCGAGG, GTAGCAGGAGAGATCCCAAA	6	2527, 6271, 3056, 5061, 7942, 6265	0.7461	687	0.7379	688	0	0	2	6
BAZ1A	AGATGAGCAAAGAAATTCAA, GCATCACCAAAGATTTCAGG, GTAGCTTTCCACAGAGAGCA, GTAGTGGCGGAAGATCTCGT, GTCCTGCTAACAGACGAAGA, TGTGAGACAGAAGCCGCCCG	6	3061, 6569, 8659, 7317, 5659, 2020	0.7473	688	0.7388	689	0	0	2	6
MIER3	CCTTATCTTGGAGAGTACGA, CGAGGAAACTCAGTCTTCTG, GAGAAGTTCATATAATGCCT, TAAAGGTACCAATATGGCGG, TCGTACTCTCCAAGATAAGG, TGATGGTGATAAGGAATCAG	6	5476, 6712, 6328, 1759, 3089, 5840	0.7542	691	0.7444	692	0	0	2	6
BMI1	ACAAAGCACACACATCAGGT, AGACAAAGAGAAATCTAAGG, AGATGAAATGAAGAGAAGAA, CTCTAATGAAGATAGAGGAG, GTTCTGGTCAAAGAATTCAA	5	3642, 5521, 6504, 6014, 3402	0.7663	700	0.7457	693	0	0	2	5
YBX3	ACACTGCGCAGATATTTCCG, CACTGCGCAGATATTTCCGT, CCATCAAGAAGAATAACCCA, CCCCGCAGCCACGGGCACCG, GGCGGTGGCTAAAGAGGCGG, GTTTCCTGCGACGTGGGCGG	6	3097, 5497, 5584, 3972, 1178, 3302	0.7561	692	0.7469	694	0	0	4	6
FAM64A	CCAGGCAGATGGCTTCTCGG, CCATCAGGAGACCTCTGTAG, CCTGCCAAAGTGGCACCAAG, GAGAGATCTCCGGCGCACGG, TCAACCTCAACCTCCGCGCA, TTGAGGTTGACGGCTCTCAG	6	5706, 5504, 1269, 5267, 3102, 5726	0.7573	693	0.7474	695	0	0	2	6
RAG1	CTTCCTCTTGAGTCCCCGAC, GAGCGTCTTGAATTCCCTGA, GCATTCCGAAGGGCATGCAA, GCTTACAGTTGGTCTCCACA, GGACTGTGAAAGCCATCACA, TACCTTCTCAGCATTCCGAA	6	3564, 3106, 5192, 3107, 2538, 3529	0.7583	694	0.7479	696	0	0	5	6
RING1	ACTGCATTGTCACAGCCCTA, CAGAGATTGCTGTTTCCCCT, CCAGAATGCCAGCAAAACGT, CTCCTATTACCCGCTCCGTA, GAGAATGCCTGTCACCTGCG, TAAGATCTATCCTAGCCGGG	6	3109, 2430, 6263, 5005, 3805, 6401	0.759	695	0.7485	697	0	0	3	6
ZFP57	CCACAGGTGTAGCAAAAAAA, CTGTCTAGATGCCAGCCAGA, GGTAACCCAGATGGACGCGG, TCACAGAGCGTGCAACAGAA, TGTACAGAAGACGCTCCCAT, TGTGGCAGTGAATTTCACCC	6	3116, 6925, 6356, 853, 6069, 7365	0.7607	696	0.7506	698	0	1	2	6
DR1	AAGAGACTCTTCCTAATGTC, ATCATCATCGTTGCCAGACG, CGATTTGTTACAAATCTCAT, GACTCTTCCTAATGTCCGGG, TCGTTGGCCACCCGGACATT, TCTCTAGCACTAGAAAGTTT	6	8512, 8177, 3120, 7890, 8187, 2615	0.7617	697	0.7518	699	0	0	2	6
USP16	GATGCAAGAGACCAAAAAGG, GCTAAAGTAAGAGGGCCTGG, GGAGCTGCTTCGCTACTTAT, GTATTGTAGTTCAAACCAGT, GTGCCAACATGGGAAAGAAA, TGGCAAGGAGAATTCATGGG	6	5841, 3128, 1374, 5300, 6470, 3473	0.7637	698	0.7538	700	0	0	3	6
TAL1	AGACTTAAAGGGCCGCGACG, CTGCCCACAGGATGACCGAG, GCGCCCAGTTCGATGACTGG, GGGGCTCCGCTGCGGCCGCG, GTTGGTGGTGAACATAGGGA, TGAGGCTGTAGAGCAGCGCG	6	6293, 6772, 3134, 3296, 2693, 5310	0.7651	699	0.755	701	0	0	3	6
RAG2	AAATCCACCAGGAAAACACA, AATTGCACAGTCTTGCCAGG, ATAAGGGTTGATCTTCCCCT, ATTAATGTGGTGTACAGCCG, GGTTATGCTTTACATCCAGA, TTCACAGCTGGGCTACCCAG	6	3176, 1757, 3139, 3392, 4274, 4041	0.7664	701	0.7562	702	0	0	6	6
SSX1	AACAGGCCACAGACTTCCAG, ACACCTTTGCAAAGAGACCC, AGCATCAGAGAAGAGAAGCA, CACCTTTGCAAAGAGACCCA, GATGCTTTAGCATCATCCCT, TCTACTCACCCTGAATCCTG	6	4679, 7734, 6252, 7961, 1280, 3140	0.7666	702	0.7563	703	0	0	3	6
AGXT2	AAGAGGCTCAGGAAGAAGTG, CATCTCAAGGATCCTGGGAG, GCAGTGGCACAAAAGCAGCT, GCGGAAGTGACCAGGCACAA, GTTGGCAACCTGTCCCACCA, TCAGGCATGAAGTCACATGG	6	7818, 3146, 4864, 4407, 1634, 4277	0.7681	704	0.7574	705	0	0	5	6
SKI	CCTTCACGTCGTCCAGGCAG, CGAAGCACTCGTGGTACACG, CTCGCTGCAGCAGATCAACG, GCTGTTTCCAGCCGCACCCG, GGTGCGGCTGGAAACAGCCG, TGACTTTGAGGATCTCCAGC	6	3232, 7205, 3750, 2135, 3147, 6795	0.7683	705	0.7579	706	0	0	4	6
GTF2F1	ACAAAGTCAACTTTGCTACG, GCACTGGGTGAAGATGTAGT, GCTCACTGCCGAGGAGGCCG, GCTGCGCATCCACGACCTGG, GTTCAACCGCAAGCTTCGGG, TCAGCATCATGCAGCAGCGG	6	2228, 7141, 8222, 6110, 3152, 6233	0.7695	706	0.7588	707	0	0	2	6
HIST1H2BL	ACCAAGGCCCAGAAGAAGGA, CATGGCCTTAGAAGAGATGC, CGGCATCTCTTCTAAGGCCA, GGTGACCAAGGCCCAGAAGA, TAGAAGAGATGCCGGTGTCG	5	707, 4585, 3725, 6302, 7309	0.7837	718	0.7589	708	0	1	3	5
STK31	AATAACTGTTCCATCTTCAG, ACACTTGTATAGCATCTGAA, ACTGTCTGAAGTTTGCCCCC, GTATGGCAGTGTGGATATAG, TCAACCTTCAGCAGGCCCAA, TTTGATCTATGCCCCCACAA	6	2265, 3154, 5132, 5912, 5024, 3953	0.77	707	0.7592	709	0	0	3	6
MECP2	AGAAGCTTCCGGCACAGCCG, CATCATACTTCCCAGCAGAG, CTTCTGCCTCCCCCAAACAG, GATAAGAAAGAAGAGAAAGA, GCAAAGCAGAGACATCAGAA, GTTTGTCCCCACAGTCCCCA	6	5163, 5650, 3156, 7249, 1309, 5195	0.7705	709	0.76	711	0	0	2	6
NCOR2	AGAAGGCTGAAGCTGCACAT, GCATCGAGAACAACCCCCGG, GCTCTGGGCTCAGTTCCGGG, GGAGGAGCAGAAGCCCCCCG, TGATACTGCCGGGTGTCGGA, TGGTGATCTCTCGGTCCACG	6	4437, 1843, 3168, 6906, 7945, 4779	0.7734	711	0.7626	713	0	0	4	6
AIRE	AGCCATCCTGGACTTCTGGA, CCAGCAGCCCTGACTCCAAG, CGGCCACCGCGATCTCCGTG, CTTCATCTGAAGGAAAAGGA, GCACCGCACGGAGATCGCGG, GCTTCTGAGGCTGCACCGCA	6	3175, 6077, 3867, 3213, 6833, 1234	0.7751	712	0.7644	714	0	0	4	6
WBP2	ACGTGCCAGAAGCCTTCAAA, CAGGTCATCTTTCTGTCCAA, CCTAATGTCCTATGATCACG, GCTCAACAAGAATCACTCGG, GGATACCTTGAGATGCCACC, TGATCGTCAATAACACCGAG	6	4367, 4650, 4507, 3181, 3038, 7536	0.7766	713	0.766	715	0	0	5	6
NASP	AGAAACTGAAGGCTCAGAAG, AGCCACTGCCGCCGTCGCCG, CATCTGCAGATAAAGTGGAG, CCACAGTCCCGCTTACTTGT, GCCCAGGCACATCTTAAACT, GTCGGCAGAAACCAGCTCCG	6	4392, 7029, 3192, 6160, 2754, 7660	0.7793	714	0.7676	716	0	0	3	6
ANKRD1	AGAAACGTAGGCACATCCAC, AGAGCAGCCTTCAGAAACGT, GAAAAGCGAGAAACAACGAG, GACTCCTTCAGCCAACATGA, GTTGCTCCCCCAGGGTCACA, TTTCCACTGTTGCTCCCCCA	6	5349, 767, 3196, 4796, 3740, 4887	0.7803	715	0.7684	717	0	1	5	6
IDH1	ACCCATCCACTCACAAGCCG, ATAACCTACACACCAAGTGA, ATATTTCGTATGGTGCCATT, CTATCACTCCTGATGAGAAG, GCATGACGACCTATGATGAT, TTATCTGCAAAAATATCCCC	6	4627, 5220, 3981, 3369, 3187, 3208	0.7832	716	0.7706	718	0	0	5	6
CDCA2	CAGTGTTGTCCTCCAAACGT, GCAGACTCCTTGGTTTCAGG, GGTGTTCCTCCTTTACGCAA, GTTACTGTGGAAAAGTTCAA, TAACATTTCGATACAGTGCA, TTATGGAGTGAAAAGCTGAC	6	6685, 4232, 3210, 4605, 2222, 7131	0.7837	717	0.7709	719	0	0	4	6
HMGN5	AGCCAAAGAGAAGATCTGCC, AGGAGAAAAGAAAGAAGCAG, CTGCAGGTCAAGGTGATATG, GAAGATGCCACAGAAAAGGG, GCTTGTGCCAGTTACACCAG, TGGAGAAGCCAAAATTACAG	6	3237, 5805, 1079, 3219, 5144, 4623	0.7859	719	0.7736	720	0	0	4	6
ZCCHC12	AATCTGCCACACTTAGGTTA, AGGACCGAGACTTCTCCCCA, ATTCCATGCTGAGGTCCCTG, GCAAGGGTGCATTCAGCCGC, GCTAGCATCATTGCACGTGT, TTAACACCCTACAAGCTCAA	6	3226, 5552, 4010, 5084, 3993, 2522	0.7876	720	0.7745	721	0	0	4	6
GATAD2B	GCAAAGCGACTCAAAATGGA, GCAGTCCTGTTGTCTCCATG, GCCCAGCTACAGGGTCAGCG, GTTTCTTTAACAGGACCAGT, TGGATATGAGTGCTAGACGG, TTGTCTAGTGAGCCAGAGCG	6	3228, 6554, 5087, 5158, 6276, 1684	0.7881	721	0.7749	722	0	0	2	6
RBBP5	AGATGCCACAACGTTCAAAT, CTTTGGGCAGAACTATCCAG, GCTTTGTTGCAGAGTCCTTT, TCTTACCATAAAGAACACAC, TTAAGTCAATTGAGTTTGCC, TTTCAGGCGACTGTGACCAG	6	2679, 8862, 3391, 8243, 3242, 4484	0.7915	722	0.7777	723	0	0	4	6
AKAP1	CATCAAGGAACCTCTCCCCG, GCAAGATTCCCCCTTCAGCA, GCATCCCAGGCAATGCCAAG, GCTTCTCTGCGGGGACTACG, GGAGGCTCTGTGACACTGGG, TGGGACAGACGTCTTCCACG	6	6735, 3079, 7427, 4747, 3243, 6161	0.7917	723	0.7779	724	0	0	3	6
NPAT	ACAGATGCTGAATCATTAGA, AGGTTTGCTGGCAGTCAGAG, ATACTGGGATTGGATTCCAT, GCAAACAGATAACAACCCTA, GGAGCATGCAAAGTTCCCCA, TTGAAGTCTCTGGCTCCGTA	6	2547, 5564, 5465, 4397, 5914, 3247	0.7927	724	0.779	725	0	0	3	6
RNF2	ACAAAGAATGTCCTACCTGT, CCCTTGACTAGACTGCAGCG, TCATCACAGCCCTTAGAAGT, TCTCAGGCTGTGCAGACAAA, TTACAGGAGGCAATAACAGA, TTCAACATACCCACTTCTAA	6	5041, 2850, 4455, 4908, 3263, 4266	0.7966	725	0.7822	726	0	0	5	6
CTR9	AGAAAAAGTGATTTGCCAAA, CCAAATGGTTCAATACCATA, GACTTCGATCAGTTACCGGA, GCCTGCTTCTGCCTACTTGA, TCTAGAACTCAACAATAAAG, TTTGACCCCATCATGTCGCG	6	3271, 6029, 8549, 5583, 981, 8264	0.7986	726	0.7838	727	0	1	2	6
HDGF	AGTTTGGCAAGCCCAACAAG, CCAGAGCCCGAAGCTGCAGA, CCGCGGAGCGCTCACCACCG, CTTCCCTTACGAGGAATCCA, GCAAGCCCAACAAGAGGAAA, GTGGATTGAGATGGAGCAGA	6	6797, 4538, 5770, 3067, 4505, 3274	0.7993	727	0.7843	728	0	0	4	6
SMYD3	AACTCTGCCAAGAAGTCGAA, AGAAGTCGAACGGAGTCTGG, CAGCATATCCAGGTAGCAGA, CTGACTGAAGATAAGAAAGA, CTGCATCTCCGCATTACAGA, GCAGTCCGAGACATCGAGGT	6	3760, 7030, 1307, 4588, 3284, 7472	0.8018	728	0.7857	729	0	0	4	6
CD1D	AGTTATTTGAGGCGTTCCCA, CAGCGCTTCCCCAAGCCTGG, CCAAGGCTTCAGAGAGCGGA, CGAGATCTGGAGGCAGCGGA, GCACAGCTGGAGCAACGACT, TTATCGAAGCAGCTTCACCA	6	3293, 5532, 6990, 7746, 4502, 1792	0.804	729	0.7875	730	0	0	3	6
RPE65	CACTGGGTAGACATTAACAA, CCCGTACGTAAGCATCAGTG, GCAGGGATCTGGGAAAGCAC, GCTTGAATCGGTCACTGCAG, GTAAACTCACCTGCTTGCAG, TGTTAATGTCTACCCAGTGG	6	2088, 4025, 6324, 3303, 5834, 3970	0.8064	731	0.7889	731	0	0	4	6
HDAC2	AAAGTCTGCTACTACTACGA, ACAGCAAGTTATGGGTCATG, GTATAGATGATGAGTCATAT, TCATCTATACCATCTCTCAT, TCTTCGGCAGTGGCTTTATG, TGGGTCATGCGGATTCTATG	6	7910, 1497, 6427, 5174, 3312, 5098	0.8086	732	0.7906	732	0	0	2	6
CBX7	AGAGAGGTCCGAAACCCAAG, CTTCTTCCGGATGCTCTCCA, GCATCCGGAAGAAGCGCGTG, TCAGGGCTCCCGCTGCCGAG, TCTCCCCAGGTACAGCACGT, TCTCCTCGTAGGCCATGACG	6	3316, 3792, 1304, 5324, 9028, 8970	0.8096	733	0.7912	733	0	0	3	6
SUV39H2	AAAGCTCTACAAGATGGCGG, AATCGATTGGAATCACCAAA, AGTGAAGAAGCTGAAAGACG, ATGAAAGCTCTACAAGATGG, GCCAGATTCTACAAATACTT, GTATCAAGTGAAACTAGGCA	6	6358, 3328, 6012, 7330, 2293, 5608	0.8125	734	0.7928	734	0	0	2	6
POLR2F	ATTCGCTTCTGGTTGGCCTG, GCCTGCGGTCGCTCCCCAGA, GGGTGTCATGTCAGACAACG, GTACTTGGTCATGTATGGTG, TGACTTGGAGAATGCCGAAG, TGTGGTGATTCGCTTCTGGT	6	2564, 3340, 5576, 4924, 6492, 7692	0.8154	735	0.7947	735	0	0	3	6
BRPF3	ATAGCAGGTTAGTTTCCAGC, GCAGACTTCAGGGATCCAGA, GGATGCCTGAGTCCACCATA, GGGCATGCTTACCTGTAAGA, GTAGTGGTCTCTCCTTTCAG, GTCTACCTCGACAATCCGCT	6	1168, 5333, 3907, 4002, 7294, 3341	0.8157	736	0.7948	736	0	0	4	6
SMARCAL1	AGCAGCCCAGAGCCTCCCCA, CCCATCCCAAAATTTCCCAA, GAGCTGAGAAGCAAACGCCA, GCTTGGGGTCCACTTCAGAA, GGTCCAGCTGAACTTGTGGG, TGCCTCTTACAGAGGAGCAG	6	5076, 4554, 3355, 577, 4560, 5873	0.8191	739	0.7977	739	0	1	4	6
AFF4	ATTGTGATAAGACAATGCCG, CGGAATCAGGAAATTCAGCA, GCACTTCTCAGTCTCAGAAA, GCAGCTGCTGAAGAGCCTCG, TCTATCTTCAGGCCTCCACG, TGAAGGAGCAGATAACTCCA	6	6908, 3908, 3358, 4421, 4548, 875	0.8198	740	0.7983	740	0	1	5	6
CIR1	AGGGCCATCGATGCACCCCT, ATAGCGGAGATGAGAAACAG, CATCTCCGCTATTAGCTCCG, GCACCCCTCGGAGCTAATAG, TCACTTGCCTGAATACCAAA, TCTCCGCTATTAGCTCCGAG	6	7139, 6937, 3361, 3966, 2722, 8614	0.8206	741	0.7988	741	0	0	3	6
NAP1L5	GAGGAGGTAATGGCGGAAGG, GCCTGCGGAGCCTAGCCAGG, GGCTGGTGACCCTGACAGCG, GGGTGGAGACTGTGACAGCG, TGCGGAGCCTAGCCAGGCGG, TGGCCGACTCGGAAAACCAG	6	3375, 4853, 6558, 6446, 1052, 5939	0.824	743	0.8013	743	0	0	3	6
SATB1	AACAATGTGAGTGATCCGAA, ACAGGTTTCGACCAACACAG, ATAGATCTACTGACAGGGGG, GAGTATGGATCATTTGAACG, GCATCTGTCACGTAAGACAG, GCCATGGGAGAGCTGCGCAG	6	7081, 3814, 6661, 3380, 7832, 618	0.8252	744	0.802	744	0	1	3	6
TRIP12	AGACCCTGAAAGCAACCAGG, CCACAAGACGACTCAATAGG, GGCCTAATAACAATCCAGGG, GGTCACTGCGACGTTCACAG, TCTCCGTGACAACATCTCCA, TGTGACATCCGAGGACCAAG	6	8362, 3388, 6059, 4120, 6436, 2252	0.8271	745	0.804	745	0	0	3	6
PHF14	ACACAAAATCCAGAAGTGGT, ATAGTAGCCCTGCCAGTGAA, CAGTGGATCGCAGCTCCAAG, GCTGACTTGTTCCTCTGTAG, TCAAGGAGACAGATGCTGGA, TTACAGGCATCACAAAACCA	6	3389, 3141, 4739, 5233, 3683, 3494	0.8274	746	0.8041	746	0	0	5	6
CHEK1	AGTACTCCAGAAATAAATAT, CTTCCATCAACTCATGGCAG, GTACTTACTGCAATGCTCGC, TCCATAGGCACCTTCTCCCA, TCTTCCATCAACTCATGGCA, TTATTTCTGGAGTACTGTAG	6	5469, 8086, 5958, 3394, 8465, 3195	0.8286	747	0.8045	747	0	0	2	6
POLR2H	AATACTTACCCAAGTCTACA, CAATACTTACCCAAGTCTAC, GCTAGTACCTTGTATGAAGA, GTTGTATTCACCATCATCCA, TGGAAGGCCTATCATCAGTG, TTCAGGTGACAAGTTTCGGT	6	3406, 3765, 6185, 4169, 8040, 1522	0.8315	748	0.807	748	0	0	4	6
HIST1H2BB	ATTCATGATCCCCATGGCCT, GAAGGAATTCATGATCCCCA, GCATCTCATCCAAGGCCATG, GGGGCTGGAGCAGACTTAGA, TCTGCTCCAGCCCCTAAAAA	5	2008, 7484, 4021, 5871, 6118	0.846	758	0.8079	749	0	0	2	5
CHRAC1	CATCATGAAGAGCTCCCCCG, CGTGGGTAAAGACAAGGGCG, GCCACCTATTCCTACAGACA, GGTGTCCAGCATCAACCAGG, GGTTGATGCTGGACACCTCG, GTTGATGCTGGACACCTCGG	6	4648, 4563, 6676, 1377, 3414, 4206	0.8335	749	0.8081	750	0	0	5	6
PHF7	AGACTAGGAGGGTAACCCAG, CTGCCTTGTGGCCAAGAAAG, GCTATGCCTTCGAGAACCTG, TCTAGTAAGCTGCCTCAGAG, TCTGCCTTGTGGCCAAGAAA, TGGGGATCCCGAAAAATTAG	6	8014, 4082, 821, 4527, 3417, 4617	0.8342	751	0.8086	752	0	1	5	6
CIITA	AGCCAAGTACCCCCTCCCAG, ATAGGACCAGATGAAGTGAT, GCCGGTCTGGAGATGTTGGG, GGAAGGTGATGAAGAGACCA, GGTCCATCTGGTCATAGAAG, TTTCTCTGCAGCCTTCCCAG	6	3421, 4567, 1213, 5407, 3909, 3436	0.8352	752	0.8093	753	0	0	5	6
PAK1	ACACATCCAGAACAGCCTGC, ATAAAAAGAAAGAGAAAGAG, ATAGTGCTGGTATTTCTCAT, GATGCTGGAACCCTAAACCA, GCTGGTATTTCTCATCGGAG, GGAGCAGAAGAAAAACCCGC	6	4644, 3441, 3315, 4355, 5592, 5531	0.8401	753	0.8123	754	0	0	4	6
CASC5	ATGATTCTCTGAAAATACAA, CTCTTCTAGGGTATTCCAGA, GCTAGATTATAAGCTGCAAG, GTAATTATCTGTGAACAATA, TGCAGCTTATAATCTAGCAC, TGTTATCAGCTACCTCTACA	6	2697, 3449, 6313, 5218, 7918, 6844	0.842	755	0.8137	756	0	0	2	6
TERF2IP	ACGCTCATCCTGCACGGCGG, ACTCTGTTCGTGAGGGACGA, CGTGGAGATGAAATCACCCG, GATTTGGGCAAAGACCCCAA, GCAGTCCAGGATGTACTGCG, TCGACGCTCATCCTGCACGG	6	3456, 7046, 7028, 2179, 5712, 3787	0.8438	757	0.8149	758	0	0	3	6
PIAS2	AATGCAGCGCCCTCATCAGG, CCGCGGGTGGTATAAAATGG, GCGCTGCATTTATTGAAGAG, GTATAATCTCTCCTACCACC, TGAAGCAGCACAGAACCAAC, TGTAGAACCTGACTTGGCCG	6	3582, 4247, 6644, 3020, 3474, 5587	0.8481	759	0.8188	759	0	0	4	6
HIST1H1C	GCCGCCTCTAAAGAGCGTAG, GGCCCCTGTAAAGAAGAAGG, GGCCTTCTCCGCAGGAGGCG, GGCTGCTCTGAAAAAAGCGT, GGTGTCAGAGCTCATCACCA, TTTCTCCACATCATAGCCGG	6	8267, 6054, 5444, 746, 3475, 6693	0.8484	760	0.8191	760	0	1	2	6
ATN1	ACTGGGCCCCAGTAGAGGGA, CTTCCTCTTCCACTTCTCAA, GCTAGCCTCTGGCTGTCGAG, GTAGGGCCTCAGAGACCCCA, TCCAAGCTATCCAGATCGGA, TGTCCTGGTCGATATCCCTA	6	3486, 4102, 6120, 4574, 7397, 3444	0.8511	761	0.8211	761	0	0	4	6
MED29	AGGGATGCTGAAAAGCAACG, ATAGGGATGCTGAAAAGCAA, CAGTCGTAACGCACTTCCGG, CTAGACCTTGATGAAGGTTG, GTAGACTCTCCTTCAGCTGC, TGTAGACTCTCCTTCAGCTG	6	5040, 6288, 1671, 5228, 3500, 6727	0.8545	762	0.8227	762	0	0	2	6
HEYL	AAGCGACCCAAGGAGCCGAG, AGAGAAGGCGAATCCGGACG, AGCCAGGAAGAAACACAGAG, CCAAGCGTCGCAATTCAGAA, GGGTCCGTCGGACTCCCCGT, TTCCAAGCTGGAGAAAGCCG	6	5473, 6675, 3501, 4138, 622, 6057	0.8547	763	0.8228	763	0	1	3	6
DPY30	AGAAAAGTCATCAAAGCAGA, CATCTGCTCTGGCTCCATGG, GAAAATCCTCACTCTGAGTA, GAGCCAGAGCAGATGCTGGA, GATGCTGGAGGGACAAACGC, GTGAGACCGTACTCAGAGTG	6	2242, 8577, 3525, 5560, 6761, 7111	0.8606	764	0.8262	764	0	0	2	6
HIST1H2BC	ACACAGAGTAACTCTCCTTG, CTTGGAAGAGATGCCAGTGT, GGCATCTCTTCCAAGGCCAT, TGGCATCTCTTCCAAGGCCA, TTACTCTGTGTACGTGTACA	5	7715, 8170, 8995, 4148, 2880	0.8727	776	0.8263	765	0	0	2	5
TANC2	AGACCTCAGCAATCACCCAG, CCAAATTTCTCTGTGATCCG, CCTGCTACTGAATTTGGCCG, GCTGCTGCAGCATATCCCAG, GCTTGATTAGGAACATGGAG, TCTGTCTCATCCTTGTACCA	6	3544, 3267, 6250, 6321, 5590, 5875	0.8652	766	0.8297	767	0	0	2	6
NSL1	AAAGTCTTCTCGGGGAGTGG, ACAGTTCCGACGAAAAATGG, AGTTCCGACGAAAAATGGCG, CCACTCCCCGAGAAGACTTT, CCGCTCTGCGAGATGCGCAG, CGAGCTCCTTGTCCCATGGA	6	5797, 6092, 8586, 3546, 8114, 1181	0.8657	767	0.83	768	0	0	2	6
SUDS3	CCAGCTCTTCATCCTCCTCG, CTAACTTTATTCAGACACTG, GAGGCGACATGAGTGCCGCG, GGCCCCCGAGTACTACCCCG, GGCCGGGGCCAGCAGCCCCG, TGAAGAGCTGGAGAGCGCCG	6	2561, 5719, 6267, 8215, 3553, 6512	0.8674	770	0.8307	771	0	0	2	6
IDH3A	CTCACCTTAGAGATCCACGC, GCAGCAGTAAATTCATAGAT, GCTCACCTTAGAGATCCACG, GTAACTTTAATTCCAGGAGA, GTATCAAGCTCATCACCGAG, TGGACTCTTTAGCCTCTGAA	6	1691, 3616, 4344, 7368, 3556, 5261	0.8682	771	0.8311	772	0	0	4	6
MTA3	ATTAGTGTCTTAGTACCACT, CTATCCTTCTTATTAGGTAT, GCAACCCATACCTAATAAGA, TATTAGGTATGGGTTGCTGG, TGATTCTGTCTCATTCAGAA, TTAGACTGCAAGTGGCAACG	6	4742, 3557, 1454, 5382, 5427, 3813	0.8684	772	0.8312	773	0	0	4	6
SETD1A	AGTGCTGGTGAAGAGCACAC, CGTATGCTCTATATGCACAG, GAGATCTCCGACGACGACCG, TAGCTGTTCTCTGACCGCCG, TCAGCAAAAGGGGCTCCAGG, TGGTGGGGAGGATAACCAAG	6	3562, 8457, 9063, 8000, 1732, 7984	0.8696	773	0.8319	774	0	0	2	6
TAF6L	CTACTTTCCTGAGGATCGAG, GCTCCATAGTGGCAGCAGAG, GGACACTGCCCACCAGACAG, TCATGAAGCACACCAAACGC, TGAGCCGGACAGACTCCCGA, TGTCAGAGCGAGAAGAGCGG	6	7669, 8795, 8323, 8247, 3569, 1318	0.8713	774	0.833	775	0	0	2	6
E2F6	AATCCAAGAACCATATTAGA, CCAACAAAAGAAGCTACAGG, CTTGTCAGATCTGCTCCCGG, GGGTATTCTTGACTTAAACA, GTTTAAGTCAAGAATACCCC, TTTAAGTCAAGAATACCCCC	6	5313, 6556, 1657, 3571, 8436, 6457	0.8718	775	0.8335	776	0	0	2	6
GTF2H3	CAGAGGGATTAAATTCAGGA, CCAGAGGGATTAAATTCAGG, GACACCAAGGATACAGCAAA, TCTTTCCAGGATATAAGAAT, TTATTTGCAGGTGACATAAA, TTTCCATCTTTACTCCCAGA	6	5635, 3581, 8814, 7721, 1450, 5829	0.8743	777	0.8348	777	0	0	2	6
SIN3A	ACCAGATGCCAACAGCTCCG, ATAAGGTCCGAAAGGCTCTT, CAGCCATCATCACCCAACAG, GAAAGAGCAGAGAAATGCCA, GCAATTTCAGAGGCTGAAGG, TAGAGTCCTCAGACCACGAA	6	8233, 3583, 1921, 6618, 7439, 6440	0.8748	778	0.8352	778	0	0	2	6
THUMPD2	CGCACCTCTCGCATTACGAA, CGGAGGCGCGTGGAGAGCCA, CTTACAGAAGAAATAATAAG, GCCGCCATGTCGGAGGCGCG, GCGAGGCCAACTCACCTGCG, GGAGCCGTTCGTAATGCGAG	6	5685, 3308, 6039, 6426, 7808, 3584	0.875	779	0.8355	779	0	0	2	6
PRPF6	AGAGTGGCTGAGCATCCCCG, CTAAACACTCCATACCCAGG, GCAAGGTCTTGAACAAGGCG, GCGCCACTGGCTTCACCACG, GTGCATGGCGATCATCCACA, TTTCTTCATCTGGTCCCCAA	6	6055, 2396, 6691, 8618, 7306, 3585	0.8752	780	0.8358	780	0	0	2	6
NPM2	CAAAGAGGAGATGCATCGCG, CAGTAGCGCCAGTAGCACGG, CCAGGCCTCAGTCCTCCCCA, CCTGCCCCCAGCAAACCAGG, CTTGGGGGAGAAAGCCAAAG, GGAGGACAAGAAGATGCAGC	6	3593, 6018, 4473, 4892, 7148, 2326	0.8772	781	0.8367	781	0	0	4	6
TAF11	AGCTGCAGCGGAGGAAGGCG, AGTTTCCTCTGGGATTCCAT, CGACACCGATGGAATCCCAG, GGAATCCCAGAGGAAACTGA, GGACTTGAAAGAAGCTGCAG, GTCTCTCCACCTTTGTCGGA	6	5052, 5751, 2402, 3601, 3747, 4163	0.8792	782	0.8385	782	0	0	4	6
TSG101	ATAGGACGAGAGAAGACTGG, CTATCCGCCATACCAGGCAA, GGATTGGGAGGGTATCCGGA, GGGTATGGAGAGATTCCACC, GGTATGTGTCCAGTAGCCAT, GTAGGCTTAACAAAACAGAT	6	4744, 5574, 3605, 733, 7825, 8181	0.8801	783	0.8392	783	0	1	3	6
PPP1CB	AGTCTGTGCCGACAAGATGG, ATAAGCCAATAGCAAACAAA, ATTTATCGTTTGTCAGTACG, CTCATCACCCGGCTGCTGGA, GAGAACTTCTTTCTCTTAAG, GCACTCACCCTCCAGCAGCC	6	4610, 3607, 4642, 8832, 7142, 2329	0.8806	784	0.8397	784	0	0	4	6
COPRS	CATGGACCTTCAGGCCGCCG, CCTAATGACAGTCCTGCCCG, CTCTTTGTCAATTTAGCCCG, GCCCGCCGCTGCCTAGCGCG, GGGGGCGCCCCCCAGCCCGG, TGAAGAGGAAGGCTTTGCCA	6	7058, 3613, 5579, 3201, 7158, 7539	0.8821	786	0.8409	786	0	0	2	6
MINA	CATAGTATGTGGCCAGTGCA, CCTGGCACGAGAGTACAGCG, GTGGAGGCCGAGGAAAGGAT, TCATCTCTCTGAATGAGAAG, TCGACATCATCATAATGGGG, TCTTCCTTCCCACTCCCTGT	6	1084, 5842, 5694, 5990, 3614, 5991	0.8823	787	0.841	787	0	0	2	6
TRIP4	AATCAGGCGACCATCTAAAG, GAGTGCCACAGAATAAGCAA, GTTCCGGCTGGGGAAGATGG, TATGTTACTGATCTCCTCCA, TCAGGCGACCATCTAAAGCG, TCTGGCCCAGGCAATCACAA	6	4717, 4940, 8379, 549, 4825, 3619	0.8835	788	0.8414	788	0	1	5	6
MAP3K4	AGTCTCAAAGAAAAAAGACA, ATGTGGGGAGGCCAGCCAGT, CGGCGGCTCCTCCATGGCGG, GCAAAGGGCACGTATAGCAT, TGAGCATCTCCAACGCCAGA, TTAATGGTACTTCAGTAGAA	6	7971, 6159, 3620, 7780, 5097, 3493	0.8838	789	0.8417	789	0	0	2	6
SS18	ATAGGCATATTCTGTGTGGG, ATATGCCTATGGGTCCTGGA, CTGTGGCTTTCGCGGCCCCG, TCAGATGGAATGGTAGGTGG, TCTGTGATGATGGCACAGAA, TTTCACCTTCTGAATCGCAG	6	3622, 4314, 7795, 8063, 8190, 1103	0.8843	790	0.8422	790	0	0	3	6
DPF1	AACGGTATAAGAACCGGCCG, CCACCGATCTTGTACTCGCA, GAAACGGTATAAGAACCGGC, GTACGTGTAAATCTGTCCCG, TGGAGGATGACATTCCCAGG, TTTCTTCCTCCAACAGCGGG	6	7773, 3637, 4438, 4165, 5002, 2023	0.8879	791	0.8443	791	0	0	4	6
L3MBTL2	CATGAGGTAGCCCTTCCAGT, CCAAGGAGCGAGGAGTCCCA, CCTTCTTCTCCAAGACCAAG, CTTCTCACCTCAATACTCCG, GAGCCTTCCTCCACTCTCAA, GCTGAGCAAATGCAGCGGGG	6	3647, 680, 6765, 4645, 5305, 3999	0.8904	792	0.8455	792	0	1	4	6
AGXT	AGTTCCCCGAAGCCATCAAG, CTCGCATCATGGCAGCCGGG, GCTGCTGTTCTTAACCCACG, GTGCTGCTGTTCTTAACCCA, TATGCGCTCCCCGATGTCCA, TTGCCGGTCCATGTAAAGGG	6	3652, 4001, 5179, 5818, 4233, 2050	0.8916	794	0.8462	794	0	0	4	6
MTRR	AGAGGACAAGAGGAGATAAG, GTAGAAACCACAACAACAAG, GTAGCAGCTCTGACTTCACA, GTGAGAGTGGGGGTACCGAA, TAGAACTTGTGGTTGAGCCG, TGAGTCCTCACTTACCCGTT	6	4229, 1071, 6129, 4583, 5913, 3678	0.8979	795	0.8504	795	0	0	4	6
EPC1	GACCGCCTAGAAAAAGGCAG, GCAGGTGTATGGCGAGAAGA, GGTCGGGCAGATCCTCACAG, GTAAAACAAGAGAAGCGAGA, GTAAACTGTCGTTTCGGGCG, TCTTCCTTCTCCATTCCGGT	6	6030, 2662, 4935, 5161, 3681, 5542	0.8987	797	0.8509	797	0	0	3	6
TDG	AAAAGCTTGAGCTTGCTGAA, GGGAATGGAAGCGGAGAACG, GTAGAGTGTGATCATCCATA, GTTTATGTCAGGGCTCAGTG, TGGATGATCACACTCTACCA, TGTATTTCAGAGGCTCCAAA	6	2102, 4173, 3693, 4521, 6884, 3986	0.9016	798	0.8523	798	0	0	5	6
HIST1H2BO	ACCAAGGCCCAGAAAAAGGA, AGATAGAGTAACTCTCTTTG, CGTAACCAAGGCCCAGAAAA, GGCATCTCATCGAAGGCCAT, GGGCAGGAGCAGATTTAGCC, TCTGCTCCTGCCCCCAAAAA	6	8653, 4722, 1196, 8221, 5626, 3706	0.9048	800	0.8542	800	0	0	3	6
ERCC5	CCTTCTTCCAGCAAAATGCA, GCTGCCTCTGGAGAGTGCAG, GTAAAGGAGGCAAAACATAG, GTAAAGTTCTTGGAGAAGGA, TTAATGGCTGAAAGAGTCCG, TTAGACATAGTGACGCACCT	6	2620, 6198, 3708, 5462, 5605, 6067	0.9053	801	0.8544	801	0	0	2	6
AIM1	ACGCTCTGTGGACAAAGGAG, AGCCCAGCCCCGGTACCAAA, CTTGGACTCTGGGCTCGCAG, GAGCGCTGCCAGGGACGACG, GATCCCAGCCCAGTCACCAA, GCTCCCTGAGAGCGCTGCCA	6	7193, 7049, 6709, 688, 3729, 3771	0.9104	802	0.8565	802	0	1	3	6
KDM5C	ACTGTGACATCCTTACCACA, AGATCCCCAAGGGTGTCTGG, ATGCCCTTAGGGTATCACAG, CCAAGGCTACAACTTTGCCG, GAAGCTAGACCTGAACCTGG, TCTCTCTCCCAGATAAGGAG	6	1034, 5389, 3742, 5428, 4673, 7429	0.9136	803	0.8579	803	0	0	3	6
WWTR1	ATCCGAAGCCTAGCTCGTGG, CAGCCAGTCGAGGCCCCGGG, CCTTAAAGAAAGACTCCGGC, GCAGAAGATGAATCCGGCCT, GGCTCCTTAAAGAAAGACTC, TCCAGCACCGACTCGTCGGG	6	3745, 8142, 6660, 2065, 5491, 3872	0.9143	804	0.8581	804	0	0	3	6
ASH1L	AGCACTGTAGAGGTTTCAGG, GCATGCATATAGGAAGGAGG, GCCACCACTTTAGTCCACCG, GGAGAAGTGCAATATACAGG, GTACTACAAGAAGCCTTAAG, TAGTTGGCAGAAGATCTCGG	6	5094, 6551, 5868, 3749, 6571, 2975	0.9153	805	0.8585	805	0	0	2	6
KANSL1	AGTGAGACCACCACTTCAGA, GGAGTCTTTGAAGTTGCAAG, GTCTTCACCTCAGAACTAAG, TCACTGACAGTAGTTCAGGA, TCATAGGACTGAGATAAGAG, TTGGGGGGTGTCAAATTGGA	6	3757, 8250, 6678, 7334, 7090, 1468	0.9172	806	0.8596	806	0	0	2	6
TAF12	ACTGCAGTGGTAAAGATACC, AGAGGTTGATTAGGGCTGAG, CATGGCCAATAGTACTGCAG, GAAATTGGAGAGGTTGATTA, GCAGTTGGATGAAGATGTGG, TTATGGATGAGAAATTGGAG	6	6344, 507, 7216, 4414, 7736, 3768	0.9199	807	0.8619	807	0	1	3	6
HLTF	ACAGTCTGAAACTAAAGGCA, GGTTGGACTACGCTATTACA, GTTGGACTACGCTATTACAC, TCTCAAACTTCCAAATAAAA, TTAGGATTCAATTTGGAAAG, TTTCGCTGTTCCCAGAATGG	6	3733, 5553, 3956, 7569, 6377, 3789	0.925	808	0.8652	808	0	0	3	6
BRWD1	AGCTGTACTTCCTTATCGCC, CCTTATCGCCCGGTACCTAT, GAGAGGCACCGGGCGTCGGG, GCCGTCGTCCGCCCGACGCC, GTCTTACCCGACTCGATGAG, TATCGCCCGGTACCTATCGG	6	4299, 5415, 3793, 3751, 4835, 7387	0.926	809	0.8656	809	0	0	4	6
TEX10	CAAAGTTGACGCATTTGCCA, CATTACTGAAGGAATTCAGG, CCTTGGCAGATGGATCCAGT, CGTTCTATACCATTCCCAAC, GATGCATCACTACAATGCTG, TCTGCCTGAGCAACTCAAAG	6	2944, 8133, 8747, 5998, 3800, 8051	0.9277	810	0.8666	810	0	0	2	6
UBR2	ACTCACCCCCGCAATCTCCT, AGGAGGAGAGAAGATGGCGT, GTACATAGTGGGCTAAATGC, GTACCCAAAATCTACTGCAG, GTTCGGCCGAGGAGATTGCG, TTCGGCCGAGGAGATTGCGG	6	5329, 7357, 2719, 3803, 4268, 6956	0.9285	811	0.8667	811	0	0	3	6
DOT1L	CTACGAGCCCTTCTCCCCCG, GCAGCAGGTCTACAACCACT, GCGCGAGAGCAAGAGCAACG, TCTCGGGGTCGGTCACCGAG, TGAACACTGCGAACCCCGAG, TTTCCTCTCAGAAGAGTGGA	6	8731, 3811, 8660, 9004, 3433, 8466	0.9304	812	0.8675	812	0	0	2	6
PRKAA2	AGAAGCAGAAGCACGACGGG, CGGATCTTCTTAAATAACGT, GCTGAGAAGCAGAAGCACGA, GGATATAAAAGACACCCCCT, GTTATTTAAGAAGATCCGAG, TTGAAGAGATGGAAGCCAGG	6	6904, 3864, 3682, 4806, 3817, 5742	0.9319	813	0.8684	813	0	0	4	6
HMGB1	AAACCTATATCCCTCCCAAA, AGGATCCCAATGCACCCAAG, CTAAGAAGTGCTCAGAGAGG, CTCAGAGCAGAAGAGGAAGA, GGAGATCCTAAGAAGCCGAG, TTTCTAAGAAGTGCTCAGAG	6	3818, 7761, 4564, 4731, 7506, 3351	0.9321	814	0.8686	814	0	0	4	6
HELZ2	AGACGCAGTGAAGGAAGACG, CAGCCGAGAGAAGTAGCACG, CGGCACCCTGGGCTTCCGCG, GGTGCTGCAGAAATACCACA, TCACCATGATGTGGGCCGCG, TCTCGTCCAGAAGCTCCCGT	6	7192, 4298, 2594, 3821, 8385, 4259	0.9329	815	0.8693	815	0	0	4	6
BRD4	ACTGCAATACCTGCTCAGAG, CCAACCCTAACAAGCCCAAG, GAGCAGGTATTGCAGTTGGT, GATTTCTCAATCTCGTCCCA, GGTCTGGACGATGAGGTCCG, TTAGGGTTGGAGGTCTCTGG	6	8511, 1412, 7519, 3823, 5507, 6116	0.9333	816	0.8694	816	0	0	2	6
CHD6	AGATGGCCTCCAGAAACAAA, AGGAACTGCAAACTTCTGGA, CGATAATGAGAAAAGGGCCG, GCTAGCCACCTGCAACCCCG, TGTTTGTTACAGGTTCACCC, TTTGTAGTCAAAATTGACAG	6	4561, 3826, 4447, 6796, 4390, 2014	0.9341	817	0.8699	817	0	0	5	6
CENPI	ACATGGACAAAACAATCCAG, AGTCACATACCTCTAAGCAA, CAAGTGTTCTGGTAGCACCA, GCATGTTCATAATCTCCCAC, GCCGTGAAGCAAAGAAACCG, TTATTCTGTGAAGCTTTAAT	6	6589, 5585, 8628, 3552, 7000, 3827	0.9343	818	0.87	818	0	0	2	6
P4HA3	CCTTACCCGGAAATAAGCAA, CTGACCTGTACAGCCCCAAA, GAGGCCAGTGAGAACATCCG, TCCACTCTCCGTAAGATCCT, TGAGAGTAAATGCAAGCAGA, TTACGGAGAGTGGAAGACAG	6	4315, 6019, 5236, 5046, 3829, 1761	0.9348	820	0.8703	820	0	0	3	6
HIST1H2BM	AACAAGGCTCAGAAGAAGGA, ACACAGAGTAGCTCTCCTTG, CATAGCCTTGGAAGAGATGC, GAAGCGCAAACGCAGCCGCA, GTTCATGATTCCCATAGCCT, TCTGCTCCAGTCCCTAAAAA	6	8173, 8518, 4294, 6889, 1296, 3837	0.9368	821	0.8712	821	0	0	3	6
GATAD2A	ACAGTGACATGAAGTCCGAG, CTTGAAGGAGACTAGCACCG, GCTTGAACGGGACCCAACAG, GTGCTCCCAACAGAACCTGT, GTTGGCAGACCTCTTCAGCT, TGAGTGCCCCGAACAAGCGG	6	6207, 7239, 919, 6877, 3842, 7405	0.938	822	0.8717	822	0	1	2	6
URI1	AGGAAGCCACGTTTCTAAGA, ATGAAGGCAAAAGGGCCAAA, CCAGAGCCCTCTTAGAAACG, GCCAAGAGAGAATCCAGCAT, GGTGCTGAGTCTTTCTCGAA, TTGAGCACCGGAAAGAACGT	6	1551, 6357, 3846, 7431, 6168, 7006	0.939	823	0.8723	823	0	0	2	6
DPF2	ACTGACCCCCTGGAGAAGCG, CTATCTTCCCTGCAGCCTTG, GCAGTACTACAAAGATGCCA, GGGCACCTCGCTTCTCCAGG, GTAGGAGTACAGCTGTCCGG, TGGATGGAAAAGCGACACCG	6	7209, 3850, 7438, 3660, 4807, 7925	0.9399	824	0.8726	824	0	0	3	6
POLR2K	ATCATTGGTTGCTGCTTTGG, CCAATGATATATATCTGTGG, CCTCCACAGATATATATCAT, GCTAACAATGGACACCCAGA, TGGAGGTTGAACGTCCTTCT, TTGGAGGTTGAACGTCCTTC	6	3118, 3856, 6977, 5813, 4456, 4190	0.9414	825	0.8745	825	0	0	4	6
PHF21A	CAGCTCCTCAGCTTATCCAG, GATGGCGGTCACCATAGCAA, GCATTGTGATAGCTACTCCA, GCTTTGAGTGAGAAACAGGT, GGAGTTGCAGACTCTACAGG, GTTGCTGCTTTCAAGACGAG	6	4556, 2546, 4106, 3859, 4828, 5640	0.9421	826	0.8746	826	0	0	5	6
SMAD4	AGATGGGGCTAACAGAGCTG, AGTCCTACTTCCAGTCCAGG, CAGCCTGCCAGTATACTGGG, GGATTAACACTGCAGAGTAA, GTCGATGCACGATTACTTGG, TCTGCAACAGTCCTTCACTA	6	3860, 915, 5512, 5293, 4432, 3971	0.9424	827	0.8747	827	0	1	4	6
MED28	GATCAGGAAGAAATTCGAAC, GCTTGGCCCGGAAGGCCCGG, GGTTCGAATTTCTTCCTGAT, TAGACCTTCCAGCAGTACTT, TGAAGAAGCGAAGCTTGGCC, TTGCGCCATTCCAAACATGG	6	7126, 3052, 6413, 4270, 3862, 4589	0.9429	828	0.8749	828	0	0	4	6
KAT5	ACTCACCTGGGGAAAAACCG, ACTTGAGGCAGAACTCGCAC, AGGAAGTCCGTTCTTAGTGG, CGTGGCTTCGATCAGACACC, GCTGGGCTGCCACTGCCCTA, GTACTTCTCCCCGTACCCAC	6	7549, 8949, 3865, 7653, 3110, 7115	0.9436	829	0.8755	829	0	0	2	6
NAP1L4	AGTCGTCACAGAAAAAGCAG, ATACCAGCCTCTCTTTGACA, GCAGCTTCCACGGAATCTGA, GCTGAAGAGCCAGATCCCAA, TAGAGAAGAGAATTTATCAC, TGGGGTTCCTTCAGATTCCG	6	610, 4381, 5869, 6390, 5299, 3866	0.9438	830	0.8756	830	0	1	3	6
BAZ2A	ATAAGACCCTGGCCACACAG, ATTGAGGGAAGGGCAATCAA, GCACTCACCTGACAGTAGGA, GTAGTTCCAGAGACAGTCGT, TGTGGAATCGTTACACCAAG, TTAGTACCTGAGCCGCAACG	6	5408, 3869, 4183, 5420, 2580, 4155	0.9446	831	0.8758	831	0	0	4	6
CBX6	CCGAATCCATCATCAAACGG, GCCTATAACGCGGTTCCGCG, GCTGGAGTGCAGCTTGGGCG, GTACAGCACTTGGGAGCCCG, TCAACCGCAAGGTGAAGCCG, TGAAGCCGCGGGAGCCCAAG	6	3873, 4303, 5652, 508, 4494, 6520	0.9456	832	0.8761	832	0	1	4	6
TCEAL6	AAGAAAAGCCAGACGCGGAG, ACTGGAAGATAAGGGAAGCC, AGAATGCGAGGGAAAGCGAA, GAGGGACAACTGGAAGATAA, GCCTCCCAGGCAAAGCCAGA, GGAAGAAAAGCCAGACGCGG	6	4710, 3881, 5859, 1871, 6941, 6715	0.9475	833	0.8767	833	0	0	3	6
USP3	AACAAGTCAAACAGACCCAA, ATACCACACCAGGAGCCAAG, CTACACTTGGAACTTCAGGG, GACTCAGCCAAGTTCCCCAA, GCTGCAGCACCAGGACGACG, TTACCTGAGTGACTGAAGGA	6	5488, 3914, 3883, 5885, 5955, 3479	0.948	834	0.8772	834	0	0	3	6
PWWP2B	CCAGGACCATCAAGCGCACG, GCCATGGCTGTCGTTGACAG, GCGGCGAGCGGAGCTTCGCG, GGACCATCAAGCGCACGCGG, GTCCGGGGCTGGCCTCCGGG, TCGAAGTAGGGAGGGTACGG	6	5525, 3310, 3887, 5931, 7896, 6089	0.949	835	0.8775	835	0	0	2	6
SNRPD3	AACACCGGTGAGGTATATCG, ACACCGGTGAGGTATATCGG, CCTGCTCCAGCTGTGCCACT, CTTCCCCCGATATACCTCAC, CTTCCTGCCAAGATGTCTAT, GCCTCATGCAGTACTTTAAT	6	6036, 7864, 5320, 6389, 3911, 2800	0.9548	837	0.88	837	0	0	2	6
LIMD1	CGAGTTTGAGGAAACTCGCA, GCAGGAGGAGACTCTGCCCA, GGTCCACTGCCTCCTCCCAG, GTAGAGGCCCTGTCAATGGA, GTGGGTGGCCTAGCTCCCCG, TTTAGGGGATGGTCCCCGCA	6	2121, 3920, 3930, 6854, 5964, 4839	0.957	838	0.8807	838	0	0	4	6
SMNDC1	ACCAGCAAAGGTGATTGCAG, AGCATTGCCATAACCAGCAA, CAGAAGGTTGAGTTGACAGA, CCTACTTTCCATGAATGAGT, GAGGAGATAGATGAAGAAAA, TCTTTACAGGTGTTATGAAG	6	8099, 6099, 3923, 2992, 7643, 8085	0.9578	839	0.8809	839	0	0	2	6
ASF1A	ACAAACATATGCCTTCCTGC, ACGGGTTGTAGAAAGGAGAA, CAGGTCCTCGATGCACTCGA, GATCACCTTCGAGTGCATCG, GGTTCAGGTGAACAATGTAG, TTAGTGGGTCCTGTTCCCGC	6	6216, 532, 5989, 3937, 6670, 6482	0.9612	840	0.8826	840	0	1	2	6
CDCA5	AGCCTCTGCGGAGGTCCCAG, ATCACCTCGCAGGAGCCCTA, CCTTCGGCCAGATTTCAGGG, TCTTCTCCAGACACCCAGTG, TTAGTAAGCTCCCTGCCAGG, TTATGTCTGGGAGGCGAACG	6	3732, 7605, 8275, 3950, 6860, 7938	0.9644	841	0.8849	841	0	0	2	6
DPPA3	ACTCATCTTCGATTTCCCTG, CTGCTCCTACAGACTCTCGA, GCTCACCGAAGAAAATTCCC, TTAAACTGTGATGGGTCCAT, TTAATCCAACCTACATCCCA, TTACTCCGTCGAGAGTCTGT	6	6718, 6425, 7854, 3963, 6215, 1842	0.9675	842	0.8862	842	0	0	2	6
DHX36	ACACAGATCCCAGTTTAAGA, ACGTTGGCCAGATTATGTAA, AGTCGGTTGCCAAGGAAACA, GGGGCAGAAGAACAAGGAAG, GGTTTGCTCCTGAGGATCAT, TGTGGTACGCGAAAAAACAG	6	3711, 7869, 8090, 3964, 6259, 7978	0.9678	843	0.8863	843	0	0	2	6
DHX38	AGAGTCAGTGAAGAGATGGG, CTTCCTATCGGGATTCTGAG, GCAGTGGGAAGATGACCAGA, GCTCCGCTCAGAATCCCGAT, GGACTTTGAAGAGGACAACG, GGATGCCTCGATCCATCGAT	6	6119, 1580, 3975, 4459, 5947, 6149	0.9705	844	0.888	844	0	0	3	6
SCAI	CACAATATGGACAGAAGCAG, GCGATTCGATGTGATAACAA, GCTGAAGATGATATCCCACA, GGAAGTTCCAGCAGCAGCAT, GGAGCCCCATTGCTGGAACA, TTATTCTCAAGTCAATAAAG	6	3983, 6025, 5578, 6683, 5548, 3951	0.9724	845	0.8882	845	0	0	2	6
HIST1H2BE	AAACAGGTCCACCCCGACAC, CGGCATCTCCTCTAAAGCCA, GCATCTCCTCTAAAGCCATG, GGCATCTCCTCTAAAGCCAT, TTTAGAGGAGATGCCGGTGT	5	8643, 2469, 4653, 7222, 6655	0.979	848	0.8897	846	0	0	2	5
RBBP7	ACTGGGCCACTGAAGAGCAT, ATTACATACCTGGTTTAGCA, TCCCATTGTGACAGTGACAA, TGATGAGCAGAATCATCTGG, TTAAGAGGTCACCAGAAGGA, TTATGACCCATGCTCTTCAG	6	4217, 4858, 4957, 4727, 1822, 4000	0.9766	846	0.8902	847	0	0	6	6
KDM4A	ATATTTCTTCAGCATTAACG, CATCAGCTCACCTTGTCAAA, GCCGTACTCAATCCACCGAC, GCTATGGGTGGGCCTCACAG, GGACATGGTGAAGATCTCCA, GTATGTTGTACTGAGTAAAG	6	4751, 4004, 2803, 7686, 7299, 5089	0.9775	847	0.8903	848	0	0	3	6
MBD3L5	ACCAGGTCAGACGCAGAAAA, CCAGGTCAGACGCAGAAAAG, CCTTCTCCTTGGCTGCTGCA, CGTTTCTTCTGTAAAGCCCA, GAAGAAACGAGAAATCCACA	5	8079, 6842, 3653, 4663, 4850	0.9811	850	0.8907	849	0	0	3	5
MKL1	CCTTCTCTGCTCATGAAATG, GGTGGTGGTAGCCTTCCCAG, GTACCACCAGTACATCCCCC, GTTGTGTCTCAACTTCCGAT, TCAATGAGAAGATTGCACAG, TGTCCTGCTTCTGGTCCGGG	6	3788, 4240, 4974, 5175, 4014, 4055	0.98	849	0.8915	850	0	0	5	6
GTF3C4	ATAGGGTGTTCAACCCTGAG, CCATTAGCATCGCAACCCAT, CGGCAGCTGAAACTGCCACA, GCTCCCGCCGAGTCACCATG, TGGTCCTCGGACCAAGCCAG, TTGAGGAGACAGCTGTTGAG	6	7671, 8638, 4035, 2792, 8965, 8256	0.9851	851	0.8941	851	0	0	2	6
NCOR1	CCATGAGCTGATCATAACGC, CTAAAGGATCCAGCATTCGG, CTTTCTTTAGCTTTCCTCCG, GATGTTCTCATGGTACACCT, GTTCTGTGCTGAATGCTCCT, TCATGTTTAGAGTTGGGCAG	6	1756, 7507, 4423, 4051, 7112, 5136	0.989	852	0.896	852	0	0	3	6
BCAT2	ACCTCGTTCCCAATGAGCAC, ATCCGGTCCATGTTGAGCCA, GGTCCATGTTGAGCCAGGGG, GTCGGCCAGGAGGGAGACCG, GTGTCCCCGCAGCTGTTTGA, GTTCGTCATTCTCTGCCCAG	6	4053, 6866, 1138, 7288, 4389, 4116	0.9895	853	0.8961	853	0	0	4	6
SFMBT2	ACAGACTTCGACCAGTTGGT, ATAGGGCCTTTCCCTCGCAG, CAATACATACACCTTCCAGG, GACGCAGGAGAGATGTAAAA, TCTGCGCTACTGCGGTTACG, TCTGTGTGCACCACCCCACG	6	5348, 6255, 5375, 4056, 2954, 5941	0.9902	854	0.8966	854	0	0	2	6
MAGED1	CCAGGTATCTCTGAACCTGA, GCTGACATAGAGACCGACCC, GCTTATGCAGACCTTGATGG, GGTGGAGTCTGCCATCCAGG, GGTGGGGTCTGCCATCCAGG, GTTAGCAGCTAACTCACCAG	6	4060, 2334, 5369, 7300, 5666, 6635	0.9912	855	0.8969	855	0	0	2	6
ALKBH5	CTATAAGGCGGGCAGCCGGG, GGAGCACCGCGTCATCCCCG, GGCCAAGCGCAAGTATCAGG, GGCTGAAGAGGCGCATCTGG, GTAAGGTTCGGCGGCAGCGG, TGTACAGGCCCTTCTCAGCG	6	6834, 5449, 718, 5323, 4063, 6438	0.9919	856	0.8974	856	0	1	2	6
CBX1	ACAAAACAAGAAGAAAGTGG, AGAATCCCTTCCACTTTAGG, CATGAGACAGATAAATCAGA, CTTTGCCCTTTACCACTCGA, GGAGGAAGAGGAATATGTGG, TTTCAGTGAGGACAACACAT	6	4046, 6362, 7827, 4224, 8834, 4065	0.9924	857	0.8977	857	0	0	3	6
HELLS	ATAGTTATGAGGAAAAAAAG, GATGCAAGTGAAGAGAAGCC, GGACACTGCTGTGATTACCC, GTTATATCATGGAACCCAGG, TGAATCATACAATATTTCAG, TTCCTCTTCTAGCATGGCCG	6	6948, 2526, 7602, 8928, 4072, 5200	0.9941	858	0.8982	858	0	0	2	6
KDM4C	AGGTGATTCCTCCTAAGGAG, CCACCCCTGAAGTAAAAGCA, CTTGGCTTCCACTCCTTAGG, GGTCATCTGTGACTGAGTCG, GTGCACTTGCAGGAAAGACA, TACCTTGCAGATAACCCAGG	6	7548, 4075, 4753, 6228, 3819, 7995	0.9949	860	0.8984	860	0	0	3	6
OGFOD1	ACTTTGAACCCCCCATACCT, AGAAACCTTGAAAAAGCAGG, TGAGGGCTCCGAGGTATGGG, TGATTTATATAAGTTCCAGC, TGTGGGATGTGAGGGCTCCG, TTTAGCACAGGACATGTCAA	6	3836, 4127, 5577, 4622, 4377, 4081	0.9963	861	0.8988	861	0	0	5	6
MED15	AGGAGGCATGCCAATTCCAG, GCTGTGAGGGGCCATCCCCG, GGAATTGGCATGCCTCCTCG, GGTTGGTTCTGAGCAACTGG, GTACTCACAAATTTCAGTGG, GTTTCAGCGAGGATGCCATG	6	1637, 5370, 6577, 4088, 5892, 7598	0.998	862	0.8994	862	0	0	2	6
H1FX	CCATTCTGCTGGTCGAACCA, CCGAGGCCAAGAAGGTTCCG, CCTGCCAGTGACGACCGCCG, CGTAGGCTGGGCGAGCGCAA, CGTTGTCCCCATCTAAGAAG, GCTGGCCAAGATCTACACCG	6	5442, 1899, 4091, 6568, 4877, 4350	0.9988	863	0.8997	863	0	0	4	6
GSG2	AGGCGTTTCTTCAACAGCAG, CAGGAGGCCAGTGTTCCCAA, CCGAAACTCAGAATCCTCAG, CTATTCCCCTTGGCACAATG, GTGGTGGGAAATGGACCAGA, TATGAACTCAGGAACCCCTG	6	4095, 7418, 811, 7102, 6331, 6770	0.9998	864	0.8999	864	0	1	2	6
PARP10	AAGGAGGCAACAGTGCCCAG, AGCCCAGGCTTCCTGCCAGG, AGGCTGTACTGGGAGCCCCG, ATGCTCTCCTGAGGACCGGA, GTAGAGAGTGAGCAGCTCGT, TCATGTTCCAGAGACCCCAT	6	7002, 5272, 6578, 2467, 5111, 4097	1	865	0.9002	865	0	0	2	6
HMGN2	ACTTACAGCAGACAACCTCG, AGCCACAGAGAAGATCCGCG, ATAGGCTGAAGGGGATGCTA, GCGCCACGTACCTTTCTCTT, GGGAGATAAAGCAAAGGTGA, TAGGCTGAAGGGGATGCTAA	6	5722, 6003, 6393, 3465, 4099, 7977	1	866	0.9004	866	0	0	2	6
NAP1L1	CTAACCTTTCAGCCTGCCTA, GATAGAAGCCAAATTCTATG, GCCCTTCAAGAAAGACTTGA, GGTCTGGTAGAAACACCAAC, GGTGAAGAAACAAAACTCAA, TGAAGGGCTGCAAGAATCTG	6	5554, 5345, 4114, 4952, 5758, 2737	1	867	0.9024	867	0	0	3	6
HIST1H4A	ACGCCGGGCCAGACGCCGGA, GGACGTGGTAAGGGCGGGAA, GTGTTGCGTGACAACATCCA, TGGGAAGTCATGTCTGGACG, TGTCACGCAACACCTTGCGG, TGTTGTCACGCAACACCTTG	6	5314, 8507, 7687, 7340, 4129, 1167	1.01	868	0.9038	868	0	0	2	6
KDM3B	CTACAAGAGATATTCAGCCG, CTACAGTGTTCAAGGTCACA, GATGGAGGTGAGGCAAGCCG, GGGTGGAGCCGAAAACAAAG, GGTTCCTGTCAGATGCCAAT, GTAGAGTGGTGAGATCAAGT	6	4140, 6045, 6849, 6420, 1625, 5551	1.01	869	0.9046	869	0	0	2	6
SUZ12	ACTCACTCTCAAAGGCCTGG, ACTGGTTTCTTCCACAAAAA, ATGGCGCCTCAGAAGCACGG, GCGATGGCGCCTCAGAAGCA, GCTTCGGGCGGCAAATCCGG, TCAAAAGTAGAGAAAATGAA	6	8725, 3868, 8509, 8359, 7246, 4142	1.01	870	0.9047	870	0	0	2	6
DEK	CATGTTAAAGAGCATCTGTG, GAGAAAGAACCCGAAATGCC, GAGCGAGGAGGAAGAGGACG, GGAAGAGGACGAGGACGACG, TCCCAGAGAGGAGAGCGAGG, TTGATCCTCACTTTGCCAGA	6	4949, 4158, 8261, 9010, 7822, 3536	1.02	871	0.9056	871	0	0	3	6
PSME4	AACTCACCTTTACAGCAGCG, CCATTCTTCTAGCATCTCAG, CTAGGACTGGGGCAAACCCG, GATTGGCTACAGATAATATA, GCACACTGCAGTATTCTGTA, TTAACAAGTTGATCAAAAGG	6	5972, 2840, 7466, 4783, 5692, 4167	1.02	872	0.907	872	0	0	3	6
CENPC	AGATGAAGAGGATAAAACAT, ATCAACTTCGTATCATCGGG, CTATTCTGAGATGATCCTGA, TATGCTGCCTTCAAGTACAG, TATTCAGTCACCAAGCAAAG, TTACAATACCAAGAAAGGCA	6	1229, 5412, 4179, 6469, 7756, 5973	1.02	873	0.9085	873	0	0	2	6
BANP	ACACAGCCTGCACCTCGCGG, AGACGTGCAACAAAGTGCGA, CATCAGCACCAACTGCCGCA, CCAAGAAGACAGCCACCACG, GGACTACCTCTTCCACCGCG, TTAGCGCTGTGCCTGGGCGT	6	3244, 4600, 8121, 5311, 4182, 8797	1.02	874	0.9088	874	0	0	3	6
ALKBH1	AGAGGAAACCCAGGTCAGAA, AGTGCCACTGGTAACCTGGG, ATAGGCTTGCCACTTGCTGA, CGAGATGGGGAAGATGGCAG, GCCGGCTCTGACGGTAGAAG, GCTCTGTTCCCACAGATCTT	6	3942, 7473, 4882, 7814, 4194, 5957	1.02	875	0.9105	875	0	0	3	6
UTF1	CCAGCCCCGACCCCGAGCCG, CCTTAAAGACAAGTTTCGCG, GCCCACCTACCGCCGCGTGT, GGGCCAGCGCGGCCGACACG, GTAGCGGCGGCGGCACTGCG, TTCCGGATCTGCTCGTCGAA	6	6747, 4819, 2836, 7776, 4197, 5312	1.02	876	0.9109	876	0	0	3	6
HIST2H2BF	AAACGGAGTAGCTCTCCTTG, ACGAAAGTGCAGAAGAAGGA, CAGCACCTTGTACACGTAAA, CTACTCCGTTTACGTGTACA, TCCCAAGAAGGGCTCCAAAA	5	8524, 4873, 1317, 5894, 5978	1.03	878	0.911	877	0	0	2	5
TAF1B	AGTTGAATACTCACAACGAA, CTACCTTCAGAAGAGCAAGC, GCAGAAGCCTTAAAGAACCT, GCCTCCTTACCGCCTCCTCG, TCAGTTATGTCTGGAAAACG, TTAACTCTGGGCCTACTCCA	6	6626, 6988, 8070, 4199, 8386, 1674	1.03	877	0.911	878	0	0	2	6
ASPHD1	GCATGTCTTGGGAGCCCAGG, GCCCAGAGTGGAATGTGGAA, GCTGTCTCTCTCTCCTTCCG, GGAAGGGAAACAGTCCAGCG, GTAGCAGTACCAGAGGAACA, TCAGCGTGGAGAGAGGACCG	6	6502, 3227, 6305, 5900, 7280, 4202	1.03	879	0.9114	879	0	0	2	6
SUFU	ACAGGAACAGATGGACCTAG, AGGAAGGTAACTACCCCAAA, GCTCGGGGATGTTAGCAGAA, GCTGGTCAGGGTAAAGGCGG, GTAGATGGCGTGCAGTCCCG, TGGCCCGCAGAGTTAATGCA	6	5010, 4207, 3385, 6037, 6343, 6027	1.03	880	0.9116	880	0	0	2	6
POLR3GL	AAGAGCTACGAGGAGCCATG, CCAGTTGACCTTCAACGTGG, CTGAGGGCAAAGGTACTGGG, GCACTGAAGCAAGAGCTACG, GGGCCAGTTGACCTTCAACG, TATTCCCCTTCCTCGCCTGA	6	766, 6424, 4208, 5896, 5555, 4904	1.03	881	0.9118	881	0	1	3	6
MED19	CCTGACTTGTCCGCGCCAGG, CTAGGTAGCACAGAGCTGAC, GGTCCCCCGCCCGCAGGAGG, GTCCGCGCCAGGAGGAGCCG, GTTCCCTCATGAGGTAAAAA, TCCTGGTCCGAAGCCGAGTG	6	7804, 4214, 3723, 6883, 8026, 8032	1.03	882	0.9124	882	0	0	2	6
USP11	AGAGCTGCCCAACATCCAGA, CATGGCAAAACCACAAACGG, GAGCCCCCCAAACAGTCGCG, GCACTGGTATAAGCAGTGGG, GCGTGGACTTGAAGAGGCCG, GCGTTGGCTGTAGAAGAGAA	6	1242, 6785, 7689, 6717, 4253, 4239	1.03	884	0.915	884	0	0	3	6
TCERG1	AGAGTGAACGATTCAACCCG, ATTGGCAGAGGCTCTTCAGA, GAGTGAACGATTCAACCCGG, GGAAGGGGAACACGAAACGG, GGTGGAAACATCATACCCGG, TCAAAAGGAGGACGTCCAAA	6	1621, 7120, 5276, 4243, 6065, 7710	1.04	885	0.9155	885	0	0	2	6
CHD1	CCTCTCCACAGACTTCCAGT, GCCCTCAGCAAAGGTTCCAA, GGACGCATCATCAGACCAAA, TCAGCTCCATCAACTTTCGG, TCATGTCCTCCAATATAGGA, TTAATTCGCCTAAGAGAACG	6	7385, 4244, 3604, 5173, 7781, 5461	1.04	886	0.9156	886	0	0	2	6
CENPL	ATACTCTTTGAGATTACTAT, ATTGTTGCTGAAAAGCAAAA, CATTCCTTCTGCATAAACAG, GGAAGATGTTGACCCTCAAA, TTACCTTCTCTATTCTCAGA, TTATCCTGACTCCACCTCGA	6	4836, 7277, 6342, 2360, 6501, 4245	1.04	887	0.9157	887	0	0	3	6
POLR1B	GCACGCAGCGGAAATGGGAG, GCTCTTCCTTATGTTCCTGA, GGAGCTCATCAAAGGAAAAG, GTACCCAAATGAGCAAGCTG, TTACTCTGAAGCATTCACCT, TTATTTCAGGAAAAACTGGA	6	1170, 5713, 7231, 8054, 8550, 4246	1.04	888	0.9158	888	0	0	2	6
ACTL6A	ATGGTGGTAGAAAGAGATGA, CCATCCTGTTCTCATGTCAG, CTAATGCTCTGCGTGTTCCG, GGCGATAAAGGCAAACAAGG, GGTGCCTCTGACATGAGAAC, TCACCTCTAAAAAATGGGAT	6	4840, 7011, 7898, 2565, 8858, 4248	1.04	889	0.9159	889	0	0	3	6
HAAO	ACAGAGGTTTGCCAACACCG, AGAGGTTTGCCAACACCGTG, CCCAGGCCCTCACTCCCAGG, GCCTGGGTGAAGGAGAACCG, GTACTATGTGGGCGACACCA, TCGCTCAACCACCAGCCCCA	6	4513, 1129, 6091, 6388, 6323, 4249	1.04	890	0.916	890	0	0	3	6
PADI1	ACACGTGTGAAAGAGCCCAT, CAAGGTGAAGAGGAGCCAAG, CAGGGTCTCTGGAAGCTCCG, CTCCAATGAGAAATTCCTGG, GTTGGGCGTCATGATCCAGG, TCTGCCAGTGATGTGCCCAA	6	4250, 8358, 5934, 6749, 6274, 2417	1.04	891	0.9161	891	0	0	2	6
GLS	ACACAGGACTGAAGACAGAA, CCACGGGTGGAGTCGCGCGG, CGGCCCCAAGGACGGCCCCG, GACGCGTTTGGCAACAGCGA, GAGCACGCATCCGCAGCCCG, GCGTGAGCGCGACTCTGCGG	6	4945, 1594, 5112, 7796, 5390, 4251	1.04	892	0.9162	892	0	0	3	6
RERE	AAGGGGTGCTGAGCAAACGG, AGCATAGCATGAGGACACGG, CAGATGTCGACACTACGCAG, GCATTCATGGAGAAGGGTGA, GCCACTGCAGTTCCCCCACA, TTAAGAGTAACAAACGCCAG	6	6337, 7356, 6409, 3980, 4255, 5095	1.04	893	0.9165	893	0	0	2	6
HIST1H3A	CAGTGGACTTCTGATAACGG, CTCGCACTAAGCAAACTGCT, GCAGAGCCACGGTGCCCGGC, GGCAGCCCGCAAAAGCGCTC, TTAGTGGCCAACTGTTTGCG, TTTACGAATAAGCAGTTCAG	6	4263, 5454, 7488, 5860, 5431, 3217	1.04	894	0.9169	894	0	0	2	6
CCNT1	ACTTTCTTATCGCCAGCAGG, AGAACTTTCTTATCGCCAGC, AGAGGAAGAACAACAACAAA, CCCCATGTCCTGAAGCAGAT, GGAAGAACAACAACAAACGG, TCTGGTTGAAGCACTATGGA	6	6232, 6117, 3409, 4275, 7260, 5582	1.04	896	0.9182	895	0	0	2	6
DLX5	AGACGGATGGTGCATAGCTG, AGCTTTGCCATAGGAAGCCG, ATAGCTGCGGACGTCTGGAA, GAAAGAAGTGACCGAGCCCG, GTAGGAGAGCAGTAGCCGTG, TGACTACTACAGCCCTACGG	6	4281, 4629, 1519, 5014, 6918, 7514	1.05	897	0.9183	896	0	0	3	6
MBD4	ACGAGATTAAAAGGTGACCG, AGTCTGAGTCTGGGGGACCG, CCAAACTGAGCAGAAGCGAT, CGCTCACTAGAGGTGACGGT, TTAAAGGCTTTACGTCGTGG, TTAAGAAATGGACACCTCCT	6	4287, 6431, 5368, 6825, 4482, 2854	1.05	898	0.9188	897	0	0	3	6
ARID1B	ACTCAACATGGCCCATAACG, AGTGCATCATCCCCATCCCG, GCTCAGCACCCCGTACCCCG, GCTGATGGCATTCGTCCCAG, TACTGGGGAGAAGATCACGA, TCATCTCTCCAGCATCCCGG	6	1692, 5671, 4290, 4752, 4566, 7268	1.05	899	0.9189	898	0	0	4	6
JMJD6	GAGCAAGAAGCGCATCCGCG, GAGCTTCTCGCTGAGCCCGG, GCGAGGCCAAGCGGAGTGCG, GCTGCTGTCAAAGATGTAAA, TGAAAGACCTTACAAGCCCG, TTAATTCCCTCAGGATAACG	6	5529, 6349, 4302, 3922, 6758, 7798	1.05	900	0.9197	899	0	0	2	6
HP1BP3	AGGAGCTCAGCTGATCCACG, AGTGAGGCAGAGCAGCCAAA, CCTCACCTAACTTGTCCGCG, GCCTCACTCGAAGTAGCAGG, GCTGAGCTCCTACTATAAGT, TCGAACTGTGAATTCTACCC	6	5729, 719, 4755, 5204, 4318, 5160	1.05	901	0.9218	900	0	1	3	6
SRSF1	AACTCAACGAAGGCGAAGGG, ATCGACCTCAAGAATCGCCG, CGACCTCAAGAATCGCCGCG, CGGGTCCTCGAACTCAACGA, GTGTGATTCGTGGCCCCGCA, TCGTTGAGTTCGAGGACCCG	6	7628, 4320, 3503, 8865, 7243, 8016	1.05	902	0.9219	901	0	0	2	6
PHB	CCACAATGTCCTGCACTCCA, CTTAGCTGTTGCAGGAGGCG, GCACATTACGTGGTCGAGAA, GCCAATGGACTCAAACACTT, GTCATCTTTGACCGATTCCG, GTGATGACTGGCACATTACG	6	6392, 7856, 3707, 4327, 7647, 7204	1.06	903	0.9226	902	0	0	2	6
CTBP2	ACCTGTACCGGAGGAACACG, GAGCGTGGAGCAGATCCGCG, GCAGGTTCTAAACGAAGCCG, GTAGACCCTCTGCACGCCCA, GTGATCGTGCGGATAGGCAG, GTTTCTGTACAGGTCGCACG	6	7348, 8194, 4330, 7406, 5749, 1174	1.06	904	0.923	903	0	0	2	6
KMT2A	CCACTTCTAGGTCTCCCACG, CTAGTCCTCGAAAACCTCGT, GACATTTCAGAGTTACCAAA, GAGAGCCTGGGGTAAACCAA, GGATCATTAAGACCCCTCGG, GGTGGGCCCGGGCTTCGACG	6	4331, 3705, 4965, 7485, 7934, 6533	1.06	905	0.9231	904	0	0	3	6
TAF1L	CATCTTCATCATAATCCGAG, GCGCTGACTTCAAACGCACA, GGAAGAGTAAAGATCGGCCA, GGATCAAGTGCCAAAACAGG, GGCTGACGAAAACTTCCTGA, GGGAGGATATCAAACACAAA	6	5183, 6348, 6316, 4334, 4374, 1109	1.06	906	0.9232	905	0	0	3	6
HIST1H2BD	ACACTGAATAGCTCTCCTTG, CGGCATCTCTTCCAAGGCAA, CTAAGGCTCAGAAGAAGGAC, CTTCTTGGAGCCCTTCTTTG, GCATCTCTTCCAAGGCAATG, TCTGCTCCTGCCCCAAAGAA	6	7025, 4342, 3703, 5614, 4461, 6873	1.06	907	0.924	906	0	0	3	6
MAGOH	CCTGGAGTTTGAGTTTCGAC, CGACAGTGAAATTACCAAAG, CGTTACTACGTGGGGCACAA, GAGTTTGAGTTTCGACCGGA, TTATGTACATAAAAGCGTGA, TTTATCTGCGTTACTACGTG	6	8595, 7616, 7784, 4347, 4624, 3982	1.06	908	0.9246	907	0	0	3	6
GPS2	AACGGAGGCGAAAGGAACAG, ACTCATCTCCTCAGCATGCA, GAGCGGGAGCGCAAGCGGCA, GCTTTCCAACGCCATGGCCA, GTATGCAGCTGATGTTAGGG, TGATGGAGCGGGAGCGCAAG	6	6429, 4349, 6787, 6902, 2493, 6333	1.06	909	0.9249	908	0	0	2	6
MED10	ACTTACTCAAAAACTTCTAA, AGAAGTTCGTGGAGAACATT, GGAGAAGTTTGACCACCTAG, GGAGCACCTGGAGAAGTTCG, GGGACGGGCCGAGGCGATGG, TCTCCAGGTGCTCCTCTAGG	6	7621, 8652, 3588, 7361, 4351, 7713	1.06	910	0.925	909	0	0	2	6
SCAND1	GCCCACACAGTTACGCTCAG, GCCTTCCAGTCCCAACGCCG, GCTCCTTCCAGTTTCTCCGG, GGCGGCCACTGGGAGTCCCG, GTGCCACCGGAGAAACTGGA, GTTGGGACTGGAAGGCTCAG	6	5857, 6518, 4565, 6970, 2962, 4368	1.07	911	0.9261	910	0	0	3	6
TERF2	ATTTACACTGACAGAAGCAG, CGCTGTTTCTATCATGGCCG, GCTCAAGTTCTACTTCCACG, GGAAGAGGCAGTCAATCGCT, GGAGGAGGCGGGAGTAGCGA, TGTGCTGGAGATGATTAAAA	6	8958, 3941, 9002, 9079, 7535, 4370	1.07	912	0.9266	911	0	0	2	6
TADA3	ATGACCCTATCGACGTGCCA, CCAAGAAGCAGAAACTGGAA, GAAGGTCTGTCCCCGCTACA, GGTCTCCAGCTCCAGCTGCA, TCTAGCCCAGAACCTGTTGG, TGAAGTCGTGGAACTGCAAG	6	4778, 4375, 3090, 8278, 6246, 5979	1.07	913	0.9271	912	0	0	3	6
P3H3	ACTGGGTCAGGCAGTCTGCG, GCAGAGGGCCTATTACCAGG, GGGCCCCGAGAAGCACGGCG, GGTAGTTGTAGGGCTCCCGA, GTCAGCGTAGAGCAAGTCGG, TGTCCTGCTCTTCTACCCGG	6	1205, 5780, 6799, 6895, 7172, 4399	1.07	914	0.9281	913	0	0	2	6
MBD3L2	CCATACTCACCAGAACAGGC, CTTGGAAAAGAGGTGAACGC, GATCCCATACTCACCAGAAC	3	6806, 7097, 6009	1.04	895	0.9311	915	0	0	0	3
PHF12	ACTGGATGAGAGGAGCCACA, CCTTTCGGCGAACAGTGCAC, GCAGCAATCAGCAGCTCAAA, GGACACATCCATCTGCCCAG, GGATGAGGAACCAGTAGCAG, TGACACATCCACTCTCCAGG	6	8080, 6364, 4441, 6049, 2320, 6894	1.08	916	0.9315	916	0	0	2	6
THRAP3	ATATGGCTCATCTCAGAAGG, CCATGGGGCCAATATAACCG, GATCTTGAACGGCCTCGACG, GATTTCCGAGGTCACAACAG, GGTAATTCTGCCAATTTGAG, TTACGCCCACGGAAATAATA	6	6961, 6283, 5396, 4454, 4369, 4503	1.09	917	0.9322	917	0	0	3	6
L3MBTL3	ATACCAACTCGAAAGCCCGA, CCTGGAAGAGGAGAAAGCGG, GATTCGGCTGTACTAAAGCA, GTAGCAACACAGATGAATGA, TACCAACTCGAAAGCCCGAT, TCTGAAAGCTGACACCAAGG	6	7553, 8389, 4467, 6286, 5416, 3462	1.09	918	0.9333	918	0	0	2	6
SND1	ATAGAAAACAAGACTCCCCA, CTTTGCATCAGGTTGTGTGG, GCAGAATCACTGGTTGCAGA, GTAGTAATCTGGGAGGAGCA, TCAGGAGGAGGCCCACCACG, TCTCATGCCTTCTCTCCGGG	6	1970, 5414, 5153, 5639, 4474, 7927	1.09	919	0.9339	919	0	0	2	6
UBAP2L	CTGAGCTGCCAACTGAGCCA, GAGATGGTCGGGAAGAAGAA, GATCACCTCTGCCTCGGCCA, GATGTCGGTGAAGCTAAAGG, GCAATAGCAGCGGCAATACG, TCTGGAAGAGGAACAGAAAG	6	6266, 7624, 4033, 7880, 5419, 4485	1.09	920	0.9349	920	0	0	2	6
ZMYND11	ATATAAAGACACATGTCATG, ATATCACAGTCAACATTCAT, GTGAGCAAGCTGACATTGCG, TCACAGCTAAGCTCAGCTGA, TCTCTTTAGGGTGCATACCG, TTTAACAAAAAGACGACAGG	6	4499, 1487, 4596, 4685, 8799, 4912	1.1	921	0.9358	921	0	0	5	6
ARID3A	ACAGCTCTACGAACTCGACG, CCTCCTCCTCATCCTCCCCG, GGAGGAGGAGGAGGATTACG, TCACAGCTCTACGAACTCGA, TCTTGTTGATGACCTCCACG, TTCAGCTTCATGCAGAAGCG	6	4694, 7415, 7916, 3615, 4506, 5493	1.1	922	0.9364	922	0	0	3	6
SETMAR	GGACCACTCTGTTTCTGCAG, GGCCAGGAAAACTTGCCGGT, GTGCGGCCAGGAAAACTTGC, TCACAGACAAACCTTCCTTT, TGACCACTGCAGAAACAGAG, TTAAACTCCGCCATCCCACA	6	5133, 4876, 4808, 3574, 4614, 4514	1.1	924	0.9371	924	0	0	5	6
ZBTB32	AGGCCTGAAGAAACATCAGG, CGTGGTTGAGGGAAAATCCA, GCAGGTGTCAGCCAGCAGCT, GTGATACTCTGATCACCGTA, TCTCTCTCAGGATTCCTTGA, TGGTTGAGGGAAAATCCAGG	6	4651, 6338, 5086, 4519, 7461, 4024	1.1	925	0.9371	925	0	0	3	6
CENPU	ACAGAGGGCTGGGCACTAAG, AGAGCGGCACCATGGCCCCG, ATAGCTGTGCTATGTAAAGG, CGGCCGCCGCCGCCCCCGCG, GGAAAGTCGAACACGTCAAT, TGAAAGTTCTGAAGACGCTG	6	8257, 4523, 8547, 7296, 7555, 1913	1.1	926	0.9377	926	0	0	2	6
RAD18	AGGCCACCGAGACTCGGCCA, CCAGACAGTCTTTAAAGCAG, GATCGCTCCAGATCCCTCAG, GGAATGTTAACCCCGCAAAC, TTACAGTTATGTGAACACTG, TTACCAGTTCATCTAATATG	6	1131, 4719, 4524, 4528, 6444, 6939	1.1	927	0.9377	927	0	0	4	6
PAPOLA	GTACGCAGTCAGTCTCCTTG, TACGCAGTCAGTCTCCTTGG, TATAGTCCAGTTACAACACA, TCCTCTTCAAAAACCCCAAA, TCTGTAATTGAAAATGTTGG, TTCCTCTTCAAAAACCCCAA	6	7360, 4815, 6326, 4546, 5901, 2640	1.11	929	0.9395	929	0	0	3	6
MBD3	AGCACCTTCGACTTCCGCAC, GAGCACCTTCGACTTCCGCA, GGGCAAGCCCGACCTGAACA, TCATCAGCATCTTGCCCGTG, TGAGGAGCTGGTCAAGACCA, TTCTGGGAGAAGAAGCTGAG	6	6130, 2284, 7271, 4555, 8567, 8248	1.11	930	0.9404	930	0	0	2	6
TCEAL4	AGTGAGGGAGAGGCAAAAGA, CAGAGAGTGAAGGAGAGCCA, GAGGGAAAACCAGAGATAGA, GAGGGAAAGACAGAAAACAA, GAGGGAGGATCAGAGAGAGA, GGAGAGTCAGAGATGGAGGG	6	3076, 5344, 6093, 4562, 8634, 5690	1.11	931	0.9414	931	0	0	2	6
HMGA1	AAGGACGGCACTGAGAAGCG, CCAACACCTAAGAGACCTCG, CTTCCCTTTGGTCGGCCCCG, CTTGGCCTCCAAGCAGGAAA, GCCTCCAAGCAGGAAAAGGA, TTAGGTGTTGGCACTTCGCT	6	7096, 6878, 4576, 2570, 8364, 7785	1.12	932	0.9423	932	0	0	2	6
UBE2E1	ACTCACCTGCAATTAGGTGG, CAGAATTCAGAAGGAGCTGG, CCAGGATCCGTGTATGAGGG, GCAACTCACCTGCAATTAGG, GGGAAGTTAGAGGACGCCCG, GGGCGTCCTCTAACTTCCCG	6	4579, 6911, 3769, 5777, 8047, 6720	1.12	933	0.9425	933	0	0	2	6
SLC22A12	ACCCCTCCTGGACAACAGCA, ACCTGCCCAGGCCACCCACG, CTTGCTTTCAGCCATGCGGG, GAGCATGAGAGTCACACACG, GCAGCGGTGGCTGGGCACGG, GTACTCACCTGTCTGAGGCA	6	3268, 6102, 6053, 4581, 8676, 4893	1.12	934	0.9427	934	0	0	3	6
KAT7	ACAGACCTATGGGAACACAC, AGGAACACAGACAGACCTAT, CATATCCTGAAGAATATGCA, CTGCAAGGCCAAATCACAGA, GCTTCGATATAAGGAAAAAG, GGGTGACTCGAGCAGATCGT	6	6741, 5944, 6463, 1967, 4595, 6199	1.12	935	0.9443	935	0	0	2	6
EP400	ATCAGTTCAAAGCTGCCGAG, CCTTGAAGTGGGTCACCAAG, GCTGAAGCCATCCTGCCGAA, GGTGTCCTCTCGAAGCCCAG, GTAACACACAGACCTCTGCA, TGTCTAAGAAAAAGATACCG	6	7290, 4504, 7150, 8387, 8900, 4602	1.12	936	0.945	936	0	0	2	6
SRSF3	ACATAAACCTTACAGTCCAA, GATGCAGTCCGAGAGCTAGA, GCAACAAGACGGAATTGGAA, GCAACCCACACACTTCGGAG, GTAAGAGTGGAACTGTCGAA, TGGAAACAATGGCAACAAGA	6	7099, 3519, 7325, 8946, 4608, 8069	1.12	938	0.9458	937	0	0	2	6
GTF3C2	ACCCCCATGCCTAAGAAACG, CCACAGTCATGTTCCCCACG, GGATGTGTCCTTCTTCACGG, GGTAGGTAATGACATCTCTA, GGTGCTGATGGATACCTGCG, TGGGGAACGACCCCGCCGAA	6	7888, 3921, 9009, 6141, 4607, 7820	1.12	937	0.9458	938	0	0	2	6
KANSL2	ACTCCTGCCCCTCCAGACGA, ATACTTACATAATCGCAAAG, CATATGCTAAGACAGAGCTG, CATTTGAGCATGAAGTGCCA, TCTGTGCTGAACATGTCCGT, TGAGTGAATGCACAAGACAG	6	4401, 6417, 8249, 4611, 7824, 8766	1.13	939	0.9461	939	0	0	2	6
HMGXB3	ATACACTCTCCCCAACCTGG, CCTGTGGTAACTTCCTAGGA, CTGCTCCTAAAAAACCTACA, GCCTTACCTTCACCTCACCA, GTGTAGACATAGCTACAAGA, TCTGATCCACAGCTACCAAG	6	6105, 3398, 5617, 7540, 7481, 4613	1.13	940	0.9463	940	0	0	2	6
SIRT5	AGTTGAGAAACTTCCCCGGT, CCATTCTTCCAGGTGTGAAG, GGGTGATGACCACGACTCGC, TCCCAGTTGAGAAACTTCCC, TCTCACACTCGGCTATGGCG, TCTCACCATGGATCTCCAGA	6	5130, 4616, 4339, 5249, 8921, 5836	1.13	941	0.9464	941	0	0	2	6
CSTF3	CCCAGAGAAGGTGAAGAAAG, CTCCTTCCTCACCTGCTCCG, CTGGGACATACTCAGCTGCC, GCTGAGGCCATGTCAGGAGA, TAATCAGCTGAGGCCATGTC, TGGGACATACTCAGCTGCCT	6	5629, 8519, 5679, 4621, 8596, 3050	1.13	942	0.9467	942	0	0	2	6
MAPK3	AGTAGGTCTGATGTTCGAAG, CCACGTGCGCAAGACTCGCG, CCGACCCCCTCGGTTCTACG, GCAGTTGCAGTACATCGGCG, GGAGCCCCGTAGAACCGAGG, GGGAGCCCCGTAGAACCGAG	6	3910, 5222, 4632, 7353, 6974, 4712	1.13	943	0.9478	943	0	0	3	6
IGBP1	AATGATCTAGACGCTTGCTG, AGGACGAGTTACAGCTGCCG, CTTGAAACGCTGGCACCAAA, GTCCAGGAGAAGGTGTTCAA, TGGACTATCCGGGAACCGGC, TTTCGGCAGCCTTCTCAAGG	6	7973, 7562, 804, 8201, 4643, 7930	1.13	944	0.9491	944	0	1	2	6
NOC2L	ATGGGGACAGAGTCCCCAGA, CCATCTCTCAACCATGGCGA, CGAGTTCTACAAGTTCCTGC, CGGAGTCCGGATAAGCCGGG, GGAGACACGGGAAGCACGCG, TGTTCCTGTGACCGTCGCCA	6	4360, 7955, 7944, 7083, 7550, 4649	1.14	945	0.9495	945	0	0	2	6
GMEB1	AAGAGAGCATGGAAGAGGCA, AGCTGGGTCGGAGAACAACA, CGATACACAAAATTGAAGAA, GGGTGTAAAGAAAGACTCAG, TCTCTTCCAGTCCTTCAGAG, TGTGGTGCAGACACCCACTT	6	6455, 6398, 4671, 7651, 8523, 4647	1.14	947	0.9508	946	0	0	2	6
KDM4B	ATCAAAGTCCTGGTGCCGCG, ATGTCATCATACGTCTGCCG, CTTTGTCTCCCCGATCTACG, GCCGTAGTCAATCCACCGCA, TCACCAGGTACTGTACCCCG, TCTCGCTGTTGGCCAGGCGG	6	1992, 5832, 4670, 5808, 6583, 7697	1.14	946	0.9508	947	0	0	2	6
HMGN1	AGCCCAAGAGGAGATCGGCG, AGTGGAAGCGAAGCCGAAAA, CCGCCGCCACGATGCCCAAG, CGAAGGCGCCGCCAAGGAAG, TTCCTTGGCGGCGCCTTCGG, TTTCTTTCTCCAAGCCCAAG	6	7563, 4707, 4672, 5393, 6374, 568	1.14	948	0.9509	948	0	1	3	6
DEPDC1	CAGATAATACCCAGTGAGGG, GACAGACCTATGGAGAGTCA, GAGCTGTCTTACCAGCTTGG, TATCTCGTAGAACTCCTAAA, TGGCAGATAATACCCAGTGA, TTTCACAGCAGGAGAAGCAG	6	6244, 4675, 7828, 4543, 6202, 5668	1.14	950	0.951	949	0	0	2	6
SMARCE1	AGCAAATGCCCAGCACACCA, CAGCCTGCTGAAGATCCAGA, GCAGGCTGAATGCTCATGTA, GTGGTTTCTCTGGAAACGGG, TATGTAAGCAAGGTACGCGG, TTATGTAAGCAAGGTACGCG	6	4674, 5778, 8528, 8972, 8935, 4181	1.14	949	0.951	950	0	0	2	6
TAF7	ACAATTGAGTTACATCCTGA, ATAGAGATCACCATCAACTG, ATATGCCTCTACTGTGAGAA, GCAACTGGCTCCTCCACAGG, TGATCTCTATCCTCCTGTGG, TTAGAGGCAGAGTAATTCCG	6	2130, 6434, 5466, 5599, 4677, 8416	1.14	951	0.9511	951	0	0	2	6
CHAF1A	AGACATTCCTTGCAAAACAG, AGGAGCTTAAGGAAAAGGAG, GAAGGATGAGAAGGAGAAGG, GGAGGCCAAGAAGAAGAAGG, TCTTCCACCAGCTCGCCCGA, TTAGACCGAAACTTGTCAAC	6	4689, 8752, 8951, 7905, 1545, 5753	1.14	952	0.9521	952	0	0	2	6
HIST1H1B	AGTCTCAGAGCTGATCACCA, AGTTGCCTTCTTCTTAGCCG, CTTTAAACTCAACAAGAAGG, GCAGTTTCTTGCCACCATGT, GGCCGCTAAGGCCTTCTTAA, TCTTGAGGCCCAGCTTAATG	6	890, 4696, 5124, 4775, 5145, 5743	1.15	953	0.9524	953	0	1	3	6
INTS12	CACAATACCACACCAGGCGA, CCGAGATTGTCATAAACCCC, GCAGGGGCTGGTTTCTGCGG, GCTTCCTTGTCTGTCACCTG, GGGGTTTATGACAATCTCGG, TTGCCATTATTATTACCAGA	6	8405, 8058, 4047, 6257, 8189, 4708	1.15	954	0.9529	954	0	0	2	6
TAF1D	CAGCCAACAGGAAGACCACG, CTTCCCCGTGGTCTTCCTGT, CTTCCTTCTGGTCTTCCCCG, GTATCCCTTACTCACCTAAA, TATCCCTTACTCACCTAAAG, TCTCCCCTTTAGGTGAGTAA	6	2324, 4736, 5152, 7117, 6527, 8594	1.16	955	0.9548	955	0	0	2	6
POLR3E	ATAAGGCTGACGCCAAGCAC, CCTGCATTACTATGGCCTGA, GATTGCGCTGAACGTGGACG, GCTGTGCCCCGGCTCAAGCG, GTACTTGGCCAAGAGTCTGG, TCTCCACCCCGCTTGAGCCG	6	1097, 7037, 4737, 8253, 8697, 8997	1.16	956	0.9549	956	0	0	2	6
MSL2	ACTGCCAATAGCAATGCTGA, AGAAACTGTTTCAAATACAG, ATTGAAAGCCCATTATAAGT, CCACCAGTCCTGCACTTCAT, GCCTGTGGAACATAAGTCAG, GCTACTGTGTCACAAACGGG	6	5460, 4774, 6063, 3482, 6387, 7094	1.17	960	0.9567	959	0	0	2	6
SNRPE	AATTCCACCATGGCGTACCG, ACCATGGCGTACCGTGGCCA, ACCCTGGCCACGGTACGCCA, AGAGATCGCGGATTCAGGTG, CCAGGGTCAGAAAGTGCAGA, GCACTTTCTGACCCTGGCCA	6	7742, 8341, 8950, 4086, 4769, 5877	1.16	959	0.9567	960	0	0	2	6
MED27	AAATGTCAGTGTGAACCTGG, ACTGCCTGAAGGATGGGATG, CTGTGGCGGCGGCAACATGG, CTTCCAGGACAACTTACATT, GCTGCGCTCCAGCGTGAGCA, TGTTCCGCATCCCATCCTTC	6	7849, 6714, 4782, 5977, 6477, 3413	1.17	961	0.9571	961	0	0	2	6
NANOG	ACACTCTTCTCTGCAGAAGT, AGATCCATGGAGGAAGGAAG, ATTGAGTACACACAGCTGGG, CCTGAACCTCAGCTACAAAC, GATTCTTCCACCAGTCCCAA, TCTTCAGGCCCACAAATCAC	6	6256, 7067, 5636, 4144, 6730, 4789	1.17	962	0.9576	962	0	0	2	6
MEAF6	ATATTATTCGTGGCTGGGAT, CATGGCGATGCACAACAAGG, CGCAGATCCCGGACACCCGG, GCAGATCCCGGACACCCGGC, GGAAGTTTAAGGAAGCTGAG, TACAGCTGCTGAGGTAACCG	6	1543, 7987, 8556, 7185, 5008, 4799	1.17	963	0.9582	963	0	0	2	6
GATAD1	AGACCACGTCGTCCTCCATG, CTGCGCTCCCTTCTTCCACA, GAGCCGGCCACCATGCCGCT, GGCCAGTGCAATGATGGCAG, GTTTGTGTAACAGAGTAAGC, TGTGGAAGAAGGGAGCGCAG	6	7232, 5292, 5822, 4820, 6910, 1279	1.18	964	0.9595	964	0	0	2	6
BRPF1	AATGAGCGTCGGAAGACAGA, AGTACGACTCCTTCTCCAGT, GCACAATCCACAGCACGAGA, GCCACCATACGAGTGCCCGG, GTACATCGAGAAGTCTGCAG, GTGACTGTGAGACCTCTGAG	6	7960, 6500, 6978, 6561, 4821, 3124	1.18	965	0.9596	965	0	0	2	6
GMEB2	ACACATTTACCTTCTGGCGG, CATGGAGACAGAAAATGCAG, CCAGGTGCACAAATTCCTTT, CCTCGTACCTCCAATGGCCG, GCAGAGCCAACCTCATCTGG, GGAGGAGGCTGTGAAGGCCG	6	7065, 4830, 2918, 4884, 7163, 7791	1.18	966	0.9601	966	0	0	3	6
KLF7	AAGCTTTCCTCAATGCACGG, AAGGTCTCTGAGATCCTCCG, AGACCCCCTGCTGCTCCCCG, ATTGGAACGCTACCTACAGA, CACAGATGGCCGCTTCCACG, GAAGCTTTCCTCAATGCACG	6	2743, 7570, 6540, 6848, 7482, 4831	1.18	967	0.9601	967	0	0	2	6
CSTF2	AGACAGCACTTAGTGCCATG, AGAGAGACAGGAAAGCCAAA, ATAAGGTGACTCAATGACAG, GCGCCCATTCAGGTTCCGCA, GTAGAGAACGATCCACCGCT, TTTGACTGTGAGAGACCCAG	6	6621, 4833, 7069, 5728, 6214, 4036	1.18	968	0.9602	968	0	0	2	6
NPM3	AAAACTGTCCATAGTGACCG, GAGTCAGGAGAGCCGAACGC, GCACGTGCTGGCACTAACCA, GGAGAGCCGAACGCGGGCCG, TCCCAGCTCTGCCTCACCGA, TTCCCAGCTCTGCCTCACCG	6	4862, 3264, 5085, 7850, 5090, 6451	1.19	970	0.9617	970	0	0	2	6
METTL13	AACCTACCTGGAACTGTGCG, ACATAAATATATCAAGCCCA, AGGAATGTAATGCCACCCGA, ATTACAGTGGCCCTTCACCG, GAGAAGTTCTTCCAGCAGCG, GCTGCAGTCTTGGTGCTGAA	6	7534, 6195, 7619, 7457, 1958, 4869	1.19	971	0.9621	971	0	0	2	6
SETD2	CCAATCTCTCATCTTCCCAA, CGGAGCTGATACTTACTCAG, GCAATACCTGAACTCCCAAT, GCTGTGGTAGTAGCCAGCAG, GTAGATCAGAAAGAGAGCGA, TCTGGGTCACCCAAATTCAG	6	7512, 8162, 6547, 4870, 7437, 3663	1.19	972	0.9622	972	0	0	2	6
ARID2	CCATTCTTCTCCAAATACAG, GCAAAAGTAGAAAAGAGCAT, GCAGTCTCCATTACACACAG, GCTCCTTCCCACCCACCGCA, TTAATGCCCAGCTTTCGAGG, TTTACTACTTGCTAATGCCG	6	5649, 6306, 4300, 4872, 6449, 5499	1.19	973	0.9625	973	0	0	2	6
TERT	CCAAGAAGTTCATCTCCCTG, CCAAGCAGCTCCAGAAACAG, CGTGGGCCGCCAGCACCACG, GAGCTTGGCATGCTTCCCCA, GCTGCGCAGCCACTACCGCG, GTGACACCACACAGAAACCA	6	7861, 4874, 4201, 8525, 8345, 6546	1.19	974	0.9626	974	0	0	2	6
SAP30	ACGCCTGACGAGATGAGCCG, CGGGAGCTCGGAGACATGAA, GCAACTGTGCTGCCTGCGGG, GCAGGCAGCACAGTTGCCCG, TGACGAGATGAGCCGCGGCG, TGGTGAGCGGTGCGGCCGGG	6	5298, 616, 4885, 7289, 7997, 5845	1.19	976	0.9628	975	0	1	2	6
MYOD1	AGAGCACTCGCACTTCCCCG, CGTCGAGCAATCCAAACCAG, GCACTCGCACTTCCCCGCGG, GCTCCGCGACGTAGACCTGA, GGGCCGGGTGCACCGCCGCG, GTAGACCTGACGGCCCCCGA	6	1151, 6713, 6922, 5565, 4879, 5823	1.19	975	0.9628	976	0	0	2	6
DAXX	AGCGGCTCATCAACAAGCCA, CAAGGACCCGTGGTTCCCGG, GATGTTGCAGAACTCCGCCG, GCTCACATAGTCGCCCAAAG, GGAATGGGACCACCTCAGGG, TCTCAGTCTCCAAGGACCCG	6	2271, 4896, 7775, 7207, 7026, 8307	1.2	977	0.9634	977	0	0	2	6
SRSF5	AGTGGCTGTCGGGTATTCAT, CATCGGGAGACTAAATCCAG, GAGGTCTGCGACTACTAAAA, GATTCTTCAAGGGATATGGA, GCAGACCTCGAAATGATAGA, TTAGGAATTTGAGGATCCAA	6	7218, 5572, 2613, 5386, 4898, 7694	1.2	978	0.9636	978	0	0	2	6
UXT	GACGCCCCCTAAGCGGCGGG, GCGCAGCACTTTCTCCCCCG, GCTCATATACCTTGTCTCGA, TCATCAGTGACGTGCTGCAG, TCATGGCGACGCCCCCTAAG, TGGCGACGCCCCCTAAGCGG	6	8880, 3852, 6862, 6781, 7145, 4902	1.2	979	0.9639	979	0	0	2	6
REST	AGAGAAGCAGGCAAAAGCCA, ATATGCGTACTCATTCAGGT, GGTCGGTGAAGAAAGACAGA, GTAAAACTAAGAAAAGCAAA, TGGCATGGCTTACAGCGAAA, TTTGCCAGCATAATAAGCTG	6	5265, 6929, 7528, 686, 4914, 7106	1.2	980	0.9648	980	0	1	2	6
BRD9	GAAGAAGCGGAAGCGAGAGA, GCTGCATGTTTGAGCCTGAA, GCTTTCAGAAAAGATCCCCA, GGAAAAGCAAAAAATCCATG, TTCATGGTGCCAAAATCCAT, TTTACCTCTGAAGCTGGCGG	6	1008, 4918, 6136, 5748, 6553, 7571	1.2	981	0.9649	981	0	0	2	6
ING1	AGCAACCACGACCACGACGA, CCAACAGCAAGCGCTCACGG, GCAGGAGCTGGGCGACACAG, GCGCCTCGAACAGCTCCACG, GCGGCAGGTGGACAGCCACG, GGACAGGCCCAAAGGCGAGG	6	3153, 7441, 6297, 5387, 4930, 7009	1.2	982	0.9657	982	0	0	2	6
BANF1	CCAAAAGCACCGAGACTTCG, CTTCGTGGCAGAGCCCATGG, GACTTCGTGGCAGAGCCCAT, GCTGGGATTGGTGAAGTCCT, GGACTTCACCAATCCCAGCC, GGCAAGAAGCTGGAGGAAAG	6	4931, 8589, 7505, 7475, 1256, 8847	1.2	983	0.9658	983	0	0	2	6
CREG1	AGCGGGCTCAGGTAGAAATA, AGGCCTCGTCCCAGTCCCCG, GCAGTGCGCGCGCGGACCCG, GCCATGGCCGGGCTATCCCG, GCCGCCGCTACCACCCCGCG, GCTACCACCCCGCGAGGACG	6	6997, 5854, 6174, 4118, 5019, 4932	1.2	984	0.9659	984	0	0	2	6
ARID3C	AGAAGATGAGGAGAAGCGGG, GCGTAGAGTGAAGGCGGCCG, GCTTCGCCATGATGGGCACG, GGAGAAGCGGGAGGAAGCCG, TCGTGGGGATGGAGTCCAGG, TTTAGCTTCATGCAAAAGAG	6	4955, 6550, 5230, 5435, 2021, 5399	1.21	985	0.9668	985	0	0	2	6
MED4	AAATAATTAAGTATGCACAT, AACAGCTGTTTACCAAGCGA, ATACTTAATTATTTCTTCAG, GAGTTGTTAATTCACCGAGA, GCAGCTACAAAAACAGCTAA, GTTGTTAATTCACCGAGATG	6	7326, 4958, 5850, 6332, 4787, 7214	1.21	988	0.9669	986	0	0	2	6
PHIP	AGGAAGTTACTCCCATCTGA, ATATGGCTACTCGTCCAGCA, GGTAGCTTGGAGTCGAAGGG, TACCCGATCGCAGCTCCGAG, TATGGGCAACAGATGATGGG, TCTGGTAGCTTGGAGTCGAA	6	7936, 6576, 5259, 4956, 7080, 1122	1.21	986	0.9669	987	0	0	2	6
MEMO1	ATACAGCTAAAGCCATGGAA, CACCAAGATGTCCAACCGAG, GGAAAGTGCACATCGAGAGA, TCAATACGAAGGTCATACAG, TCTAGCTGTGCATTCAGCTG, TGGCTTCTCGGCAGACCACT	6	6496, 4964, 7935, 6903, 6964, 587	1.21	989	0.9671	988	0	1	2	6
VPS72	AGGGGACCAGTCAGACACAG, CCCAGAAAGCCGGTTCCCAG, CGGAGATGATGAGTATCAAG, CTTCGGGTACAGGAGAGGCA, GCCTTCTGAGAGCTACCAGC, TCTGCTTCTCCATCACTGGA	6	7304, 7532, 8956, 4591, 6584, 4969	1.21	990	0.9674	989	0	0	2	6
PADI3	GCACAGGTCTTCCACATCTG, GGGAGCGTGCAGACACCAGG, GGTGAGGTAGAGCACCGCAT, GTGCTGGGCGTCATGATCCA, TCTGCTGGACGACTCCAACG, TTACCCATAAATGTCCACGA	6	5210, 4976, 5628, 3716, 6212, 5287	1.21	991	0.9677	990	0	0	2	6
KAT2A	CTCAGCTTCAGTCAGTGCAG, GCGCTGCCTGCCTTACCCAA, GCTGCTGGAAAAGTTCCGAG, GCTGGAGGAGGAGATCTATG, GGGAGGCTATCACAGCTCTG, TTCTCAAGCTTCTTGGCGCG	6	1699, 6585, 6021, 8503, 4982, 7870	1.22	992	0.9677	991	0	0	2	6
ANP32B	CATGAAGAGGAGGATCCACC, CCTGGACCTCTTTAACTGTG, GGAGCTGAGGAACCGGACCC, GTCTCTGCTTACAGCTGCCG, TCAAATGATGGAAAAATTGA, TCCGGTTCCTCAGCTCCAGG	6	774, 6074, 5373, 4988, 6047, 6123	1.22	993	0.9682	992	0	1	2	6
E4F1	CCTCCCGGCGCCCTTCAGCG, CTTCAGTGTGAGCAAGGACG, GCTTGCACTCGTGGTCCTTG, GGACGTGGTTGTCAGCAAAG, GTGCCACAAGACCTTCAAGA, GTTCACCAGTAGCTTCACCT	6	8050, 4594, 8802, 4989, 8801, 7127	1.22	994	0.9683	993	0	0	2	6
PAF1	AGGCCCCCACCAGCTCCAAG, CCATCCAGACCCAGGCCCAG, CTTGACCTCAGGCTTCTCAT, GGAAGAAATATACAAAGACA, TGATGAACTTGGGGTCGAAG, TGTGAAGCAGCAGTTTACCG	6	5782, 7256, 2993, 4991, 8252, 7611	1.22	995	0.9684	994	0	0	2	6
GTF2H1	AAGCAATTCTTTCTGCCATG, ACAGGGATCGGCTGAATACA, ACTGGAAGAGAAGAACAGGT, AGCTGCTGCCCAAATTCAAG, GAGTCAAGTGATCAGTGCTG, TCAGCTGGTCCTACATGCAG	6	522, 6867, 8671, 5586, 5012, 7889	1.22	996	0.9704	995	0	1	1	6
USP17L2	ACACGGGCCTCAGATGAGAG, ATTGCGGTCTTTGTCTCCAG, CAAAAGTGTCTGAAATCCCG, GTACAGAGCATGCAGCACTT, TATGCAAGCTCACATCACAT, TTGCGGTCTTTGTCTCCAGA	6	7284, 7467, 5025, 7151, 4953, 7744	1.23	997	0.9708	996	0	0	1	6
HIST2H2BE	ACCAAAGCCCAGAAGAAAGA, AGATGGAGTAGCTCTCTTTG, TCCGCTCCGGCCCCTAAAAA, TGAACCGGCAAAATCCGCTC, TTTCTTCTGGGCTTTGGTGA	5	7809, 7565, 5752, 4242, 6654	1.21	987	0.9711	997	0	0	1	5
SRSF9	GCGAGATCGAGCTCAAGAAC, GGCCCATTCCTCCCACCACG, GGCTGGGCGGACGAGCGCGG, GGGGTCCTCGAAGCGCACGA, TCCTTCTCGCGCACGTCGGT, TCGAAGCGCACGAAGGCGAA	6	7066, 5032, 7369, 7242, 5591, 3639	1.23	998	0.9711	998	0	0	1	6
MXI1	AGCATTCAAAGCCCCCACGG, GCAAACCAAGTGTTGTGTGC, GCAACACCAGCACTGCCAAC, GCCCGGCTCAACCTCCGTGG, GTTCCCAGCTTGCTACCTGT, TTAAAAGTTCTGATTCCACT	6	5033, 6456, 6959, 5047, 5455, 1331	1.23	999	0.9711	999	0	0	1	6
ARID3B	ACTCTGGCTAAGGGACCTAA, CCAATCTACTTCCAGCACCA, GATGATGCAGATGGAGGCCG, GCTGTGGCGGAAAGGAGAGT, GGTGGCTGAGAAAGAAACCC, TCAGAGCCTGAGGAAGAGGA	6	5042, 1376, 6995, 7259, 5114, 7253	1.23	1000	0.9713	1000	0	0	1	6
YBX2	ACTAATGTAACTGGGCCTGG, GCAGGGGAGCCGCAGAAAGG, GGAGCCGCAGAAAGGCGGCG, GGGGGCTACAGCGGTCCCCG, TCGCGGGCACCGTCGCCGCG, TGAATCGGCGGGACTTACGT	6	6430, 6164, 5054, 530, 6006, 5141	1.23	1001	0.9717	1001	0	1	1	6
EHMT1	AGAGTGCTGGTAGTCCTCAA, CGCCGACGTCAAGGTCCACA, GCACACTCAGGACAGCGCAA, GCAGGAGTCCGTGGACACCG, GCTCACCTCGGCATCGGCGG, GCTGTCCTCTGTGGGGAACG	6	8712, 6221, 6538, 2246, 5058, 7407	1.23	1002	0.972	1002	0	0	1	6
RAI1	AACTTGGAGAAGCTGTCGAG, ATTCTGGACCCGCTGCCCCG, CAGCTTCTCCAAGTTCGTGG, GCTGTCCGCTGAGCTGGCAG, GTACTGCTCTGGGGTCCGGA, GTACTTGTCGGCGGCCACCG	6	6407, 6734, 5798, 5997, 2691, 5063	1.24	1004	0.972	1003	0	0	1	6
MAPK14	AAAGAACCTACAGAGAACTG, CTTATCTACCAAATTCTCCG, GCTGAACAAGACAATCTGGG, TACCAGAACCTGTCTCCAGT, TTATCTGTACCTTTAGACCT, TTCAGCTGACATAATTCACA	6	5326, 4927, 6792, 7684, 6372, 5059	1.24	1003	0.972	1004	0	0	1	6
CBX4	CCTTGCAAGATATAACACGT, CCTTGCGCCCACTTGTCGGG, GATCGTGATGAGCAAATACA, GTATTCACCTGCACCACTAG, GTTCCCTCCCACCCAGGGAA, TGGAGAGCATCGAGAAGAAG	6	6800, 6953, 5069, 5959, 2879, 7477	1.24	1005	0.9729	1005	0	0	1	6
MIS18A	ACTTCTGCAACAGCTGGTGG, CAGCTCAGCGAGTCGCCCAG, GAGCTGGGTGGCCAGCCAGG, GAGTCTCTTGCCCAACAGCG, GCAGCTGGAGGAGGAGGCGG, GTCGGTGGCCGACATGGAGA	6	5071, 8868, 9077, 4306, 9053, 8630	1.24	1006	0.9731	1006	0	0	1	6
MIER2	ATTTCAGACCGGGAGAGTGA, GCCCTCACTTACTTTGTCCA, GCCGGGCCTCAGCTCCCAGA, GCTTGCGCTCTATGGCTACG, GGAGGAGTTCCTGTACAGGG, TCTGTGACAGGATCTCTGCG	6	5445, 2169, 6238, 5498, 6627, 5073	1.24	1007	0.9732	1007	0	0	1	6
HIST1H1E	AGTAATGAGCTCGGACACCG, CTTCTCCACGTCATAGCCAG, GCCGCCTCCAAGGAGCGCAG, GGAGTCTTCTCGGCAGGGGC, GTAATGAGCTCGGACACCGG, TCACGGGAGTCTTCTCGGCA	6	7031, 5120, 6887, 4768, 8285, 5537	1.25	1009	0.9749	1009	0	0	1	6
GLMP	AGTAGAGTCCAAAGGAGCAG, ATATGAAGCAGGTTCTGCAG, CCTCACCCTGGTAAAAACAA, CTGAATTGCGGCCGTATGCG, GCTGGGGGAGAAGACCCGCC, GTAGAGTCCAAAGGAGCAGG	6	7034, 5280, 6416, 3576, 5807, 5125	1.25	1010	0.975	1010	0	0	1	6
MED25	ACAGCAGGCAACAAGTATGG, CCACTGTGTTGAACACCACG, GAGCCAGGTGACAAACTCAT, GCTGAGAGAGTGGCACCTGA, GGAGGCTGCCAAGAACCAGA, TGAGAGCTGCAGCCTCATCG	6	6017, 6403, 5138, 6222, 4222, 5197	1.25	1011	0.9756	1011	0	0	1	6
PRDM7	AGAACAGAGTAAACACCAGA, CCTAGGTGTCCATTCTTCAT, GAGCCCTGAAAGGTCCCAAG, TAGTCTAGAGTGCTGTCCAG, TCTCCAACCTAGAACTCAGG, TGGCCCAATTCTCAGCCCCG	6	6634, 6494, 8112, 7008, 5171, 1142	1.26	1012	0.9766	1012	0	0	1	6
POLE3	ACTTTGCAATGAAAGGAAAG, GATCACCAGGATCATCAAGG, GCACGAAGACGCTGGCGGCG, GGACGGTGTCAACATCTCCA, GTACAGCACGAAGACGCTGG, GTCTCCTCGCAGCTCCCGGA	6	4559, 7783, 7582, 8141, 5188, 7792	1.27	1013	0.977	1013	0	0	1	6
PBRM1	AATAAAAGAGCAGTACAAGG, ATCTCAAGACCATTGCCCAG, CCAGCTGCACGCTATGAAGA, GGAGTTGTCGGAATAACCAA, TCAGAAATATGGCACTGAGG, TCAGGCAACTCAGATCTAGA	6	5754, 4854, 5855, 5330, 5190, 6579	1.27	1014	0.9773	1014	0	0	1	6
RUVBL2	AGATTGATCGACCAGCAACA, CCTGGAGATGAGCAAGACCG, GATCACCATCGACAAGGCGA, GCTCAATCCTTGTTACATCA, GGGAAGGGAAGATTGCCGGT, TGATCGACCAGCAACAGGGA	6	5198, 8714, 7542, 6804, 9073, 4466	1.27	1016	0.9774	1015	0	0	1	6
BAHD1	CTACCTGTACTGTGGCCAAG, GCAGATGGAAGACAGCAACA, GCTGGGTCTCCATCTCGGCG, GTGAGGCCCGAACTCAGCAT, GTTGCTGTCTTCCATCTGCA, TCAGCCTCATCTGCACTCCG	6	7343, 5191, 5567, 3786, 6710, 5946	1.27	1015	0.9774	1016	0	0	1	6
RYBP	ACCAGCTGAGAATTGATCCG, CCACCCACCCACCCTTTCCG, CGAAACCTGCCGCAGACGAA, GAGACAGCAAAACACAGACG, GGATAGCCTCGCACACCAGG, GGATTCCTGCGAAATTACGA	6	7251, 2315, 6543, 5879, 5205, 7020	1.27	1017	0.9775	1017	0	0	1	6
ERCC1	ATATTCGGCGTAGGTCTGAG, ATTACGTCGCCAAATTCCCA, ATTTGTGATACCCCTCGACG, CCTTGTCCTACCACTCCAGG, CTTGTCCTACCACTCCAGGA, TCTCCCTCCTCACCTGCCGA	6	8295, 8711, 4258, 6230, 5208, 9047	1.27	1018	0.9776	1018	0	0	1	6
BRD7	AACTGATGAGACAATTGCAG, ACAAACACAAGGACAGAAAG, AGCTGGTCCTCAAAGTAGGA, AGGCAAGTCTAATCTCACAG, GGAGCAATAAAATCAGTCAC, TTTCTGCCTCATTCTCCACC	6	5336, 3809, 7564, 6011, 5219, 5802	1.27	1020	0.978	1020	0	0	1	6
AKIRIN2	CGCAGCGGAGAAGGAGGCGG, GAAGGAGGCGGCGGTGGCCG, GAGATACTTCTGCGGCGAGG, GCCATTGTCGGCGCCCACCT, GCCGCAGAAGTATCTCCGAA, TCGGAGATACTTCTGCGGCG	6	7219, 5234, 5789, 6625, 6096, 2038	1.28	1022	0.9785	1021	0	0	1	6
GTF2A1	ACAGGAGCTTGTACTCCACC, ATACCACAAATGCAGCCTGG, GAACAGGAGTCACACCTGCA, GAGCTTGCTGATGATGGTGA, GCATATGAATGCATCAAACA, GCTACCTTAGCACTCCCTGC	6	5226, 6452, 6315, 1596, 6151, 5620	1.28	1021	0.9785	1022	0	0	1	6
MED12	CTGGTCGTAAAGAACCCCAA, CTTGCACTCTCATCTCCCGA, GCTCCTGGAGAAGAGACAGG, GTAGCTGCCCACCAGATCCG, TCAAAGGGAGAGGGAGGCCG, TCCAACCTGCCCATGCCAGA	6	7604, 8274, 8209, 5243, 3978, 7053	1.28	1023	0.9786	1023	0	0	1	6
PRDM15	AGTGATGGCGAACACCCCCT, AGTGGCAGAGATCATTACCG, CCATCACTCAGCTCGTCAAG, CGTCTGATCTCCAAGTTGGG, GCTGCTTTAGGCTCTCTTTG, GCTGGGCTCCGACTCCACGG	6	7085, 6442, 5570, 7162, 5248, 3299	1.28	1024	0.9788	1024	0	0	1	6
MDC1	GGAGAGGAAGAATTAACCAA, GTATCCTTCCCAGATCATGG, GTGTCACTGTCCTCTCCAGG, TCAGACGGTGACTCACCCCA, TCATCACTGTCCCCAAAAGG, TTAGATTTCCCACTACACCT	6	4156, 5255, 8192, 8421, 5812, 8404	1.28	1025	0.9792	1025	0	0	1	6
PFDN5	AGAAATGCTCAAGAACCAGC, CTTCTCAGATGTATGTCCCT, GGCGCAGTCTATTAACATCA, GTAGACAGCTGAGGATGCCA, TCTGATCTTGTAGACAGCTG, TTCTTGAGCATTTCTAGCTG	6	7023, 7018, 2058, 5258, 8018, 8095	1.28	1026	0.9793	1026	0	0	1	6
U2AF2	AGTACCTCAGTGATGCCAAA, CGGACTTCGACGAGTTCGAG, GCGTCGTCGCCTGTCCCGGG, GGGTAGTCTCGTCCACTGAG, GTGATGTGCTCAAAGCCTGG, TCTGGCTGTGACCCCAACGC	6	4297, 5385, 5260, 8748, 8933, 8743	1.28	1027	0.9795	1027	0	0	1	6
POLR3C	CCCAGGGTCTGAATTCTCAG, CTTTGTACAACGCTGCCCTT, GTATGAAGCCCAGTGCAGCC, TCTCAGTGGTAGGTACCGAA, TTATACAGATGGCAAGACCA, TTGGTAGTATAGATGTACCG	6	5506, 4343, 8067, 8855, 5266, 8076	1.29	1028	0.9798	1028	0	0	1	6
MED11	CACCGCTTCAGTGCAACACG, CCAAGGAAAAAACTAACGAG, CGAACCTGCATTCTGAAGGA, CTAACGAGCGGCTCCTAGAC, GATAATGGCTACCTACAGCC, GCTCCTAGACCGGCAGGCGG	6	7203, 8526, 5602, 5928, 5274, 4077	1.29	1029	0.9799	1029	0	0	1	6
SUPT20H	ACTAGCTTTGGATCGTGCAG, AGGAGATCAACCAAAATAGG, ATAGAAGGATCAAGACAGAG, CTGATGCTCAGGGGAAAAAA, GGATATTCTCTGATGCTCAG, TTAGTGGTCAATCTATACCC	6	2929, 8046, 8710, 5284, 8340, 7830	1.29	1031	0.9802	1030	0	0	1	6
POLR2B	AATAGCCACCAGGATCCAAA, CTAAATAAGAATGCAAGCAG, GAGTAGACGCAAAAGTCAGG, GGATGATGATGAAATCACCC, GTTTGGCAATATGTACGACG, TGCTTCTTGCCACAAATCCG	6	5283, 8326, 8074, 3696, 5880, 7965	1.29	1030	0.9802	1031	0	0	1	6
YAP1	ACATCGATCAGACAACAACA, ATGAACCTTTACCAAAACGA, ATTATAGGTCCTCTTCCTGA, CCTTGGGTCTAGCCAAGAGG, GAACAAGCCATGACTCAGGA, GATGAACCTTTACCAAAACG	6	7149, 5803, 5290, 6239, 5103, 7637	1.29	1032	0.9805	1032	0	0	0	6
PRKAA1	AGAAGCAGAAACACGACGGG, CAGATTGTATGCAGGCCCAG, GCAGGTGGATCCCATGAAGA, GCCGAGAAGCAGAAACACGA, TGAGGTTCTGAATTTCTCTG, TTATATCTGTAAGAATGGAA	6	7272, 7732, 5518, 5501, 1512, 5318	1.3	1033	0.9818	1033	0	0	1	6
BDP1	AATGACCCCATATTTGAGCG, AGAGTCTCTGACCTTATCAA, ATAAGGCCTGAGCTAAAGGA, ATTAAATTCACAGAACCACG, GGACTCTGCTTCCAAGCCCG, TGCCTCCGCCATGTTCCGCA	6	7181, 5331, 7750, 7951, 1765, 7933	1.3	1035	0.9819	1034	0	0	1	6
POLR2C	ACAATGTCATCACTAATGAG, ACGCCAACCAGCCTACCGTG, AGTGAGCTCCGTGATCCGCA, CCTCATCTCCAACAGCCCCC, GCACTGACCGGAATGACCCG, GGTGGCCAATTCGATTCGGA	6	3198, 8017, 7952, 5327, 7509, 8388	1.3	1034	0.9819	1035	0	0	1	6
HIRA	GATGCTGTTAAAGAATGCCG, GCCCAGATCATCGAACGGGA, TATGTCTCCAGTCCTCCAGG, TCACCCAGACAGAAAGCGAG, TGATGACAGGGACTTCTCCA, TTAGGGGTACTGGAGTCCAG	6	5341, 8441, 8351, 8414, 6766, 4832	1.3	1036	0.9823	1036	0	0	1	6
UBTF	CCAGAAAAAGAAAGATTACG, GCATGTCTTCCTGGGACCAA, GCTTCCGGAGAAGAAGAAGG, GGACTTCCAGAGAGAGAAAC, GGAGCTGCTCCGTTTCCTCG, TGGCATTCTGGATTAGGTCG	6	8749, 8281, 7171, 5342, 3306, 5897	1.3	1037	0.9824	1037	0	0	1	6
ZNF335	ACACAGACGATGAATCAGGG, ATACCTGAGAACGGCTGCCG, CCAGCTGAGGATGAGCCCCG, GCTCACACCAGCTTCCACAG, GGAGGTCTGAGATCTCCAGG, GGTGGAGAGCAGCAGCGACG	6	6650, 1666, 8013, 7063, 5347, 7451	1.31	1038	0.9826	1038	0	0	1	6
CTDP1	AGAGGCCCCGGAGGACTGCG, GCAGGCGCTCCTGAGCCCCA, GCTGGAGTGGAGGGTGGCGG, GGCCTTTCATGACAACCGGG, GGGGCTGCGTGCGCCCCGCG, TTTCACTTCCAGCTGGGCCG	6	5573, 4662, 9011, 8588, 5350, 5740	1.31	1039	0.9828	1039	0	0	1	6
MED26	ACAGATCCGGAACATGGTGG, CAGAGCTTGTATGCACCCAA, CATTCTCGTCACGCTCCAGG, CCTCGCCCAGGCAATGACAG, GACGAGAATGACAAGCACAG, GGGCGCACACAACTGCCGGC	6	5366, 7215, 8072, 8686, 2531, 7855	1.31	1041	0.9834	1040	0	0	1	6
SALL1	CCAGGAAGCGAGGTGCGGCG, CCTCATACCCTTCATCAAGA, CTCCCATGTCAGCAACCCAG, GGAACAGGTTCTCCACCAAG, GTGTTGCCAGAACTGCTCTG, TAGCGTCCTGAGCTCCCCAG	6	7515, 4995, 7054, 7650, 6530, 5381	1.31	1042	0.9842	1042	0	0	1	6
NACA	AACCTACCTGTCTCAGCCTG, GAGTGAAAAGAAGGCACGGA, GGCAACCACACAACAAGCCC, GTCGGAGTGAAAAGAAGGCA, TCCCTTCCTTCAGAAATGCC, TGAAGAACAGGATTCCACCC	6	8395, 3558, 8096, 6921, 5392, 5496	1.32	1043	0.9847	1043	0	0	1	6
MED14	AGACACTCTGAATTACCACA, CTAACTCTGCTACCCAAGTG, GCAGCAGCAATGCCATTGCA, GCAGCTGGAGAACCACCAGC, GGTGCAGCAGAAATTCAATG, TCAGTTATACCCTTACAGGG	6	7201, 6637, 3321, 5401, 8609, 5887	1.32	1044	0.9848	1044	0	0	1	6
TP53BP1	ATACTCACATGAGAAAACTG, CCAAGTTAGAAGAATCCACA, GCTGGAGAAGAACGAGGAGA, GGAAAGACTGTCCTGAACAA, GGGAGATGATACAGACACCA, TGACTGAAACTCAGTCCCAA	6	6645, 5422, 7064, 6414, 7248, 2544	1.32	1045	0.9855	1045	0	0	1	6
YEATS4	AAGATGGGCACACTCATCAG, AATTTGGGCCTGACTCCGGC, ACTGACCTTTACTCTCCCGC, GCAACATTACCGTAAACTAT, GTTTCAGTAATTTCATATGG, TGTGAAACCATATAGAAATG	6	6156, 8555, 4386, 5429, 8582, 8232	1.33	1046	0.9856	1046	0	0	1	6
CDK7	ATCTCTGGCCTTGTAAACGG, CATAGATCAGAAGCTAAAGA, CTTAATGGCGACAATTTGGT, GCCTCACCTGTCCCTCCCCA, TCAACATTGGATCCTACATA, TGAGAAGCTGGACTTCCTTG	6	8244, 3048, 5471, 9031, 7688, 9005	1.34	1047	0.9868	1047	0	0	1	6
DNMT1	ACGTAAAGAAGAATTATCCG, CCTGTTCTCTTTCAAGACCA, GATTTCTGATGAAAAAGACG, GCAGGTGGAGAGTTATGACG, GGAGAGTTATGACGAGGCCG, GTAGAGTTACATCCAGAGAA	6	7881, 7283, 3763, 7024, 5475, 8780	1.34	1048	0.9869	1048	0	0	1	6
DDB1	CGACATGTCGTACAACTACG, CTACCAACCTGCGATCACCA, GAGTCAATCACCTATCACAA, GATTGTGTGCCACAATCGAG, GCATCATTGACCCTGAGTGC, GGTCACGCAGCCGTTCACGG	6	8251, 7759, 7895, 2827, 5481, 8369	1.34	1049	0.9871	1049	0	0	1	6
NELFE	AGAAGAGGCAGAGGGCCCAG, AGCGTTCTCGAACCCTTGAG, AGTCATCCAGACGTCCCCAG, GATACCCCCCGGACTGAGCG, GCAGATATGCTCCTCTGGAA, TCTTCCTCGCTCAGTCCGGG	6	7396, 6307, 7490, 7672, 2867, 5486	1.34	1050	0.9872	1050	0	0	1	6
FAM175A	AGATCATGACGTTTAGAGAG, CCTTATATAAACCTCAAAAA, CGCTTTCCAGCACCTCAACA, GCCGAGCAGTACAAACACAC, GGAGGGGGAGAGTACGTCGG, TGATCTGATCTGAATGACGA	6	7212, 3368, 6864, 5492, 7731, 6194	1.34	1052	0.9872	1051	0	0	1	6
TBP	ACGTCCCAGCAGGCAACACA, AGAACTCTCCGAAGCTGGCG, CTGGGACGTTGACTGCTGAA, GCAGCAGCAGCAACAGGCAG, GCATCATTGGACTAAAGATA, TCAGCAGTCAACGTCCCAGC	6	5487, 5638, 8191, 8496, 2758, 5865	1.34	1051	0.9872	1052	0	0	1	6
EHMT2	AGAGCACCATCAGGGCCACA, CTGCGGCTACTTCTGCACGG, GATGAATCTGAGAATCTTGA, GCAGCGCCCCCATCTCAGCG, GCTGCACTCACCTCTCTCGG, TCAAGAGGTGACCATCCCCC	6	8160, 8756, 4905, 5502, 7043, 6380	1.34	1053	0.9873	1053	0	0	1	6
PSMC3IP	AAGATCAAAGAGAAGATGTA, AGTCCTAGATGGCAAAATCG, GCAGAGCTGCCGCTACATGG, GCTCTGCACCTTAGCAGTGA, GCTGACCTTCAAGTCCTAGA, TCCTACCAGCCTCCATGTAG	6	6940, 5513, 7846, 7923, 2053, 8407	1.35	1054	0.9875	1054	0	0	1	6
CENPK	ATGTCGAAAGGGAACAACGG, CATAACATTAGGAAAAGAAG, CTGCCATTGACTGAGTTCAG, GCATATATCAATGAATCAGG, GCTGAGACAAGATCTTGAAA, TCCATGTCGAAAGGGAACAA	6	9013, 2917, 8159, 5515, 7061, 9049	1.35	1055	0.9877	1055	0	0	1	6
PQBP1	AGAGGAAGAGATCATTGCCG, CCCACATGACCCCAACTCCG, CCTTGTTCTACCAGAACCAG, CGATGATCCTGTGGACTACG, CTTGGCCGATTTGGTAACCA, GGATGCCTCTCTTGGCCAAG	6	6270, 6320, 5739, 3420, 5966, 5523	1.35	1057	0.9878	1056	0	0	1	6
PRDM10	GATCTTTCAACAAATCAAGG, GCACCCGATCCCCAACCGGC, GCTCCGAGCTTATAAATCGG, GGGTCTGCAGAGTTGCCAAA, TCTCTTGTCCCCAGAACAAG, TTTCGCTGGTGATTTCCAGG	6	5522, 8581, 8774, 7121, 8913, 5404	1.35	1056	0.9878	1057	0	0	0	6
ZEB1	CACAAGCGAGAGGATCATGG, CACTCACCGTTATTGCGCCG, GAGCACTTAAGAATTCACAG, GCAGAAAGCAGGCGAACCCG, GCTTCACCCATACAACAAGG, TCAGAATGTACTTAAAGTGG	6	7095, 5538, 7424, 5774, 5403, 5940	1.35	1058	0.9883	1058	0	0	0	6
POT1	ACACCCCTGAATCAACTTAA, ATGGAGGTACCAGTTACGGT, CCCCTGAATCAACTTAAGGG, GAGATCTTGCCACATGAACA, GATAACATCTGAATGCTGAT, TTAGAGTTTCATCTTCATGG	6	5547, 8467, 8270, 7872, 3160, 8590	1.35	1059	0.9884	1059	0	0	1	6
CABIN1	ATACCAGCAGGACAGTTCCG, ATAGCTGTCAAATTCAGGAA, GCAGATGTCATAGTTCTCCA, GCAGCAGCTCCAAAACCCAG, GCCCATTCCTTTCTTCACGT, GTGGAGAAACAGCAAAGCGG	6	6876, 2004, 6465, 5559, 6291, 7421	1.36	1060	0.9886	1060	0	0	1	6
WAC	ACTGTGGAACAGGAGAAACA, AGAATTATTAAGCTGCAGCG, AGATAGGGATTACAGAAGAG, ATACTCACAGAGTTAGAGAG, TTTCAGCTGTCACGACCGGA, TTTGGGTCCTGAAGTAAGGG	6	7711, 4444, 5974, 8631, 5562, 6764	1.36	1061	0.9888	1061	0	0	1	6
CDK8	AAGTGAAGCTGAGCAGCGAG, AGTGACTTCACCATTCCCCG, CAGCAATTCACCTTACCCAG, GAGGACCTGTTTGAATACGA, GAGGGCTGCAAAGTTGGCCG, GTCACGTCTACAAAGCCAAG	6	5563, 6798, 6810, 8224, 8554, 2323	1.36	1062	0.9889	1062	0	0	1	6
MED16	CCAGCACTTGATCTGCCCGT, CCGTCGCTCACGCTGTTCGG, GATCCCCTCAGAGCACCACG, GCTCCACCGTACCGAGGCCA, GGATCGAGTGCAGGTCCCAG, TCTCCCAGCTATTAGCCAGG	6	7459, 7168, 5566, 6905, 4764, 7526	1.36	1063	0.989	1063	0	0	1	6
SNAPC4	GCCTCCCTCAGCCCTCCCAA, GCTGAACATGGTCTACCAGG, GGAAGCTTCCACCACAGCCG, GGAGTGGCAGAAGATTGCAG, TCAAGCTGTTGCCAAATACG, TTACATTTCAGCTTGAAAAA	6	7226, 8492, 580, 9064, 7844, 5568	1.36	1064	0.989	1064	0	1	1	6
SNW1	ATATGTACCTCTAATAACCG, ATTAATAAGAAAATTCCCCG, CATGCATTCTCCTAGCCGAA, GGATTAATAAGAAAATTCCC, TCAACTCTGGAGCTAAACAG, TTCCAGTTAGAAATACAAGG	6	5580, 5884, 7610, 8184, 8579, 3235	1.36	1065	0.9892	1065	0	0	1	6
UIMC1	ACATATCAGTCAGGGAAACG, CAGAGGTCGAGATCTGGTAG, CCAGTTCTGTCAGTGTGAAG, GTACCTCCATCACTGTTTAA, TAGGGAGGTGAACAGCCAGG, TTTGCAACAGGAACCAAAGG	6	5905, 8091, 6279, 2536, 7949, 5581	1.36	1066	0.9892	1066	0	0	1	6
LEO1	AAGGTCATAGATCGGATGGA, ACCCTTATAGAATCTGCAAG, GATTGCATCTGATTCAGAAG, GCGAAGCTGAGCGTAAAGGT, TCAGATGTAGATCAGCACAG, TGAAGACGAAGGTCATAGAT	6	7068, 5598, 1643, 8206, 7591, 6605	1.37	1068	0.9896	1067	0	0	1	6
DDX1	AAGTATCCTGTCATGACCAA, GCTCTTTCCAAGGCACCGGA, GCTGAACTGAAATTTAACTT, TCATGACCAAGGGTTATGCA, TGAAACTCTGAAAGACCAAC, TGTTGCTCTTTCCAAGGCAC	6	7315, 7576, 4698, 8657, 5596, 7003	1.37	1067	0.9896	1068	0	0	1	6
CCNE1	ACTGACCTCAGTACAGGCAG, CATCATGCCGAGGGAGCGCA, CTGGATGGTGCAATAATCCG, GACACCATGAAGGAGGACGG, GGAGCAGCCCCATCATGCCG, TTGTAGCTGGGCAAATAGAG	6	5615, 5557, 7062, 8033, 7366, 6671	1.37	1070	0.9898	1069	0	0	0	6
POLE4	CGTTGGGGCCTGGGGCTGCG, CTGTCCCGCTAGCGTCACGT, GCAGGTCCCTCCTCCTCTCG, GCTCAAGGCCGGGATGGCGG, GGGACCTGCTGGGGAGGCAG, GTCGGGATCTGCCTTCACCA	6	6204, 5606, 5231, 7675, 8125, 7705	1.37	1069	0.9898	1070	0	0	0	6
TAF6	ACCACCTTCATGGACTCCGA, CTACTACAAGGAGATCACCG, GACAACTCGTGGATGCTCCG, GAGATAAAGGTACTGAACCG, GCAGCATCTGATACAGTCCA, TTACTTCTATGAGGAGAAGG	6	4522, 8903, 8910, 8843, 8494, 5621	1.37	1071	0.9899	1071	0	0	1	6
ING3	AATGCGCGAGATGGACCTGC, CTTCACGGAAATGCGCGAGA, GCAGCTTCCTATGGATCTGC, GTCTTCTAGGTACAACATCG, TCTCGCGCATTTCCGTGAAG, TTATTATGTCATAGATGCAA	6	7435, 7956, 5631, 6213, 8777, 1182	1.37	1072	0.9902	1072	0	0	1	6
CENPH	ACGAGCCCGCGGACTCCGGA, ACTCTTAGAATATAAATCAA, CGAGCCCGCGGACTCCGGAG, GCAAGACGCCGACGAGCCCG, GCAGGTCGCCGGCGCCCAGG, GCCTTCCCCTCCGGAGTCCG	6	7657, 7169, 8132, 7238, 5632, 1383	1.38	1073	0.9903	1073	0	0	1	6
CDC73	ACAACTATCTTACAAAGCAC, ACATAACTGCCCTTAAACAG, ACCCAGAGAGTACTACACAT, CTTCTTTGTGACCCTCCAAA, GCTGCACGTCGGACATAAAC, TTCTACTTACAGCTGCACGT	6	7173, 5539, 8565, 5633, 8176, 6803	1.38	1074	0.9903	1074	0	0	0	6
CDC40	ACTCGGACAGTGAGAGCAGT, CAAGTGCATGAGGGAGTCGG, CGATTTAGTCAAGTGCATGA, GGAAGAAGAGAAACCTGGGG, TGAACCCGAACCATAGGAAG, TGTGTGGTCTGGACACACAA	6	7544, 6677, 7456, 717, 5641, 6262	1.38	1076	0.9904	1075	0	1	1	6
TPR	CTTTGCTTCTGAGTCATCAG, GATGGAACTTGAAGAAGCAA, GCGGCATGAGAAATTTAAGG, TGGCTCTTGGAAGAGAAAAA, TTAGTATCGAGAAAAACGCT, TTGTACACCTTCCTTCACAG	6	8672, 7103, 4282, 7510, 8207, 5637	1.38	1075	0.9904	1076	0	0	1	6
CDK2	AAGCAGAGAGATCTCTCGGA, ACCTCTCCAAGTGAGACTGA, AGAAGCATTACCTTGATGAG, AGGCCACTCACGTGTCCAGG, CTTCATGGAGAACTTCCAAA, GGCGCTTAAGAAAATCCGCC	6	8911, 2770, 5651, 7190, 7073, 7493	1.38	1077	0.9906	1077	0	0	1	6
SRSF11	ATAGTCGTACCATATGCAGA, CGAACTGCGCCTCTTCCCGC, GAGCAGATGCGGACTCTCTT, GCAAGGGCAGGATCAAGAGT, GTTGGCACCAGCTAATGCAG, TGGACGATACTCACTCCGGC	6	7373, 8119, 8427, 8820, 2331, 5654	1.38	1078	0.9907	1078	0	0	1	6
SIRT6	ACACCACCTTTGAGAGCGCG, CAGACGCGCTCACCTCCGGG, GATGTCGGTGAATTACGCGG, GCCACCTTCAGGGGTCCCCA, TCCATGGTCCAGACTCCGTG, TGTCGGTGAATTACGCGGCG	6	5657, 7414, 2746, 7782, 6140, 6992	1.38	1079	0.9908	1079	0	0	1	6
GTF3C5	CCTCCACCTTCCGGTCCACG, GAGAGTCTGCACTAACCCCG, GCAGGCTGCTGGTACTGAAG, GCATCAGGAAGAGAACGAGG, GCTCCCGCCTCAGCTCCACG, TCTACGCAGACCCCACCAAG	6	3513, 5662, 8289, 8378, 6521, 8488	1.38	1080	0.9908	1080	0	0	1	6
KANSL3	GATGCTTTGCAGACGCTGAA, GCAGACTCAAGGTCTCCACA, GGAGTCTTCATATCCAAGAG, GGGCCATCCACAGTAAGCAG, TGAAAGCTGGAAGAGCAGCG, TGCTCTTTGTCACTCCCCGG	6	5669, 7811, 3795, 7954, 8670, 6486	1.38	1081	0.9909	1081	0	0	1	6
MED18	ACAGGCATCATGGTGACTGG, AGTTTCGCACCAGGGCATGG, ATGATGGAGTACCTGTTGCA, GTCCACGCAGTTTCGCACCA, GTCGGGCCCTGAGAACAAAT, TGTCACACAAACCACGAAGG	6	5693, 8101, 7166, 7567, 5142, 8603	1.39	1082	0.9915	1082	0	0	0	6
DMAP1	ATGCTGGGCACGAACGACGG, CAAAACGCAGGTCAAAGCGG, CTACCCAGTGACACTGGCCA, CTAGAACTCGGGGGTCCAGA, CTGACTTTCAAGAGGCCCGA, CTTCTTGCTGATGGTCCCAG	6	8822, 7769, 7727, 5699, 8337, 4880	1.39	1083	0.9916	1083	0	0	1	6
CASP8AP2	AGACATAGCCAGTTTAACAG, GCAGTGACTGAACCCAGGAT, GGTCTCACTGGACTATTCAG, GTAGAGTGTCAGCTGATGTG, TACCATCTAGAAGAGAGAAG, TCTCATTATCAGGTTGGCGA	6	6927, 2502, 5705, 7337, 6473, 8344	1.39	1084	0.9917	1084	0	0	1	6
PRMT2	AGTACGACCCCGAGGACACG, CGTGGATGAGTACGACCCCG, GCAGAATAAAGAATCCCTGA, GGTCTGCCAACATCTCCAAG, GTACATTCCGGCAAACCATG, TGGCAGGATGAAGAGTACTT	6	7652, 5511, 7436, 7871, 5741, 7417	1.4	1085	0.992	1085	0	0	0	6
MED23	ATTGGAGCAGCCTTATTCCA, CCAACTGGTCCTCCAGCACA, CTAAGGAAGCGTGTAAACTG, GAACTGTCAGTGAATCCAGG, GTTTCTACCAGAGCTCCCAT, TCTTTATGACTGCTTAGCAA	6	5756, 7051, 6514, 8298, 6612, 4684	1.41	1086	0.9924	1086	0	0	1	6
MED24	CATCCAGCTGATCCTCCGGG, GACCACTCTAAGTCACCGGA, GCACGGCAGCCTCTGCAGAG, GGGCTCATTGAGTCTCCCGA, TAGCTGTCACGGCAAAGCAG, TCTTCATGTTGATTGCCCAT	6	8537, 7867, 8280, 2604, 6273, 5759	1.41	1087	0.9924	1087	0	0	1	6
YEATS2	CTTCTCCGAGAGAATGGCGA, GCTCCCATAAAACAGAACAG, GTATATACCTCCGGATAAGA, GTGCTTACCTAACTTCCACA, TTAAGGACAGCCAGAACAAG, TTATCATGGACAAGCAGCCG	6	7021, 6852, 5453, 6706, 8011, 5799	1.42	1088	0.9934	1088	0	0	0	6
PDS5B	ACAATTTAGAAACTACAGAA, CAAATTTCACACATTCCAGG, GATATTTCCTTGACCCCAGG, GCAAGCATATGATTTGGCAA, TATCCATGTACCAATCCGCC, TTTCATGAAGAAATTCACAC	6	5830, 6485, 4464, 6639, 7724, 6190	1.42	1090	0.9935	1089	0	0	1	6
BUB1	ACATACCTCGGACCTTTCCT, CATGAATTCAAGCCACAGAG, GAGCCCAGAAATACAATCAA, GCCAAAGGAGGAACAACAGG, GCCAGTGCTGTCCTTCAGAG, GGTGGTGGAGACATCCCATG	6	6763, 7642, 7425, 5814, 7444, 5695	1.42	1089	0.9935	1090	0	0	0	6
PLK1	CGTTGTCCTCGAAAAAGCCG, GCCCCAGCACATCAACCCCG, GCTGCTCAAGCCGCACCAGA, GGCCGACCCTGGGAAAGCCG, GTTGGAGCTCTGCCGCCGGA, TTGCCAGTCCAAAATCCCCT	6	6859, 8286, 5831, 7135, 8698, 3470	1.42	1091	0.9936	1091	0	0	1	6
MCRS1	ACTTGGTCCCCTTTGGGCAG, CTACCTGGCCCGTACCGCGA, CTGCTTCATGAGCTGCCAGT, GAGCAAGGCCCTGTTTAGCA, GCTGCTGAGCAAAGTGGGAT, GGATGGCTGCAATAGCCTCT	6	7680, 6821, 5945, 5835, 672, 7297	1.42	1092	0.9937	1092	0	1	1	6
SRRM1	CTTTCTCTCTCTCCTGACAG, GCAGCAGAGAAAAAAGGGAG, GCCCCCCTCGGAAAACTCGT, GGAGGAGGCATTCTTCTTGG, TCAGTTCTAGGAAAGCAGAA, TTAGTACCTTCACTTCCAGC	6	5252, 5847, 6335, 7726, 7189, 6103	1.43	1093	0.9938	1094	0	0	0	6
DLST	AGGTTACCCTAACAGCAGGA, CTACCAGGTTTGCCAGAAGG, GACAGATTCTGCAAACGCTG, GAGTGGGTATGGGTGCTGCA, GCAGGGGTCTCCTTATGCCA, TGAACGCCCGAGACACACAG	6	6692, 5763, 5853, 6592, 7262, 6124	1.43	1095	0.9939	1095	0	0	0	6
LDB1	AAGATGCTGCGGAAGTAGCG, ACATGATGCGGATAAAGACG, CCTGGCTCCAGGTATGTAGG, GCAGAAAGTGATGGTCAACA, GGAGTGTGACAATCTCTGGT, GTGTCCCTCGACTGTGACCA	6	5057, 7833, 7255, 5862, 8214, 6686	1.43	1096	0.9941	1096	0	0	0	6
CDK12	ACGAACGTCGTGGATCAGAT, CTCGAGGTATGAGATCGTGA, GCTCCCAGACTGGAATTAAG, GCTTGTGCTTCGATACCAAG, GTAGGAGTCATAATTGCTCG, TGGCCATAAGAAGCTCCCGA	6	2607, 8093, 5889, 8484, 7662, 7492	1.44	1098	0.9943	1097	0	0	1	6
PAGR1	AGACACTGCGGCCAGTACGG, ATAGAGCCGCTGGATTTCGG, CTTGCAGCTCCAGAGTACCG, GCTCTTCTCCCCCAGCGCTG, TAGAGCCGCTGGATTTCGGA, TGCCTCGGCCGGTAAGGCCG	6	3568, 7980, 8213, 6591, 8043, 5890	1.44	1099	0.9943	1098	0	0	1	6
CPSF2	AATGTCCTGGAAACACTTCG, ACTTTCCGACAGCATACGGG, AGGCCTGCTTAGCATTTCCA, AGTTGACTTCAACCACAAGA, CCAGCTGGTCATATGATAGG, TGGATATTATTGATTCCCTG	6	8987, 8448, 1437, 7922, 8161, 5882	1.44	1097	0.9943	1099	0	0	1	6
SMARCD1	GAAACGGCTAGATATCCAAG, GACCTGCTGGATCTGCTGAG, GCTGCTGCCTTGGGCCCGGG, GGGAGCTTCGGGTAGAAGGA, GGGTTCCCCCCATAGCCAGG, GGTCCCATGGAAGGTCCCTG	6	5893, 7966, 1061, 6938, 6855, 7270	1.44	1100	0.9944	1100	0	0	1	6
SNRPB	ATGAGGTGCATCCTGCAGGA, CATTTCTCCTTGCAGACGGT, CCATTTCTCCTTGCAGACGG, CTCGCAGCAGCACCAGACCG, GGTGCATCCTGCAGGACGGC, TGAACTCATCACAGTCACAG	6	8790, 8984, 4946, 8472, 5908, 8290	1.44	1102	0.9945	1101	0	0	1	6
GTF2E1	ATGCTGCTGGAACTTCAGTG, CATATCCTCCTCTTTCACAC, CTGTATGGCAAAAAGTACAG, GCTCAATGCCATAAAATCCC, GTTGGTCGAATCTCTCTCAT, TTAGCCAAGTATGTGATCCG	6	5768, 6166, 8409, 7032, 5907, 8724	1.44	1101	0.9945	1102	0	0	0	6
CHD4	AGAAGAAGAGCAAATCCAAG, CCACTTCCAGAGATCCCCAA, GCTATGGGATAAAACCCGAG, GGAGAAGGAAGGCATCCAGT, TCTTGGCATCAGGTACACGA, TGATGTTCCGAAACTATCAG	6	1575, 8174, 8751, 5910, 7851, 8825	1.44	1103	0.9946	1103	0	0	1	6
IKBKAP	AATGGTGAATGACAGACCGG, CCTGACAGAGAACATGCAGC, GATGCAATCAAACTGCCTGA, GTTCGGAGAGAGAAGCACTG, TCTCTCTCCGAACTGAACAG, TGTGGTCTATGGTCATCCCA	6	2466, 8560, 7842, 8684, 8852, 5924	1.45	1104	0.9947	1104	0	0	1	6
HIST1H2BN	ACAAAGGCCCAGAAGAAGGA, ACACGGAGTAGCTCTCCTTG, CTTCTTGGAGCCTTTCTTCG, GCCTTCTTGGAGCCTTTCTT, GGTATCTCGTCCAAGGCCAT, TGGACGAGATACCGGTGTCG	6	5170, 8994, 6548, 5926, 8641, 7153	1.45	1105	0.9947	1105	0	0	0	6
DYNLL1	AAAGGCCGTGATCAAAAATG, AGAGATGCAACAGGACTCGG, CATTGCGGCTCATATCAAGA, GATCAAAAATGCGGACATGT, GGAGAAATACAACATAGAGA, GGTAACCATGTGCGACCGAA	6	7464, 7503, 1572, 6318, 6209, 5943	1.45	1106	0.995	1106	0	0	1	6
PARP1	CCATGATTGAGAAACTCGGG, CGATGCCTATTACTGCACTG, GCAGAAAGTCAAGAAGACAG, GCATTCCTCGCAGGGAAGGA, GCGCTCTCCAAAAAAAGCAA, GTTCACAGCAGCAGGAGCCG	6	5950, 7041, 7924, 7588, 6636, 5026	1.45	1107	0.9951	1107	0	0	0	6
TAF13	ACAGTGCGATGTATGATGTA, AGATGAGGAAGAAGACCCCA, ATATCCACTGACTCAGTATA, GAAAATGAAGAAATTGGAGG, GAATCCTTATACTGAGTCAG, GGAGGTGCAGAAGGTGGACA	6	6544, 7991, 5102, 5960, 6001, 5988	1.46	1108	0.9952	1108	0	0	0	6
SLBP	ACCTGGCGTCACCGTCGCAG, GCCGAGGAGGCAGAGCACCG, GCCGCCCGCGAAGCCCGCCG, GCGCCGAGCGCAGACCCGAG, TCATCTGTCTCAAAGTCAGC, TCCCAGGCTCCATCGCGCGG	6	5961, 7344, 6668, 6312, 7022, 2483	1.46	1109	0.9953	1109	0	0	1	6
SRCAP	AGACTCGGATTGCTGAGCTG, GATAGCGCCAGTTCTTGCGA, GCAGTGGGCCTCCTACTCCA, GCTGAAAGTCTCCAGCCCAA, GGTGGAGTACTTGCTTGCCA, GGTGGTGGTGAACAACCCAC	6	8886, 8692, 5965, 5603, 8318, 7409	1.46	1110	0.9954	1110	0	0	0	6
SMC2	ACAGCTTTAGAATTAGTGGC, CCTGCATGATGAGAAAGTGA, GATTCAAGTCCTATGCTCAG, GTAAAAAGCTACTAGAAAGG, TCATGAACCTCAAATCCTAA, TTATCCTTCAGAAAATAAAG	6	6891, 7208, 8887, 7748, 959, 5968	1.46	1112	0.9955	1111	0	1	1	6
DDX17	ATCGGGGCTACAAAGCCGGT, CCAACTCCAATTCAGTGCCA, GCGTAGCCAAACCTGCCCAC, GCGTTTGCGTAAAAAAAAGT, GGATTACCAAATTTCTTCGG, TGGAACATCCGGAAGTAGCA	6	6595, 6760, 5982, 4189, 6979, 8700	1.46	1114	0.9955	1112	0	0	1	6
PHF23	CCATCCCCAGGAGTTGGCCG, CCTTTCAGCCACCAGAGAAA, TGAGTCTCTGGCTTAAGGGT, TTACATTCCCCCTAGCAAAG, TTCAGCCACCAGAGAAACGG, TTTCGGTCCTTCTTTCGAGG	6	4997, 5969, 7645, 8210, 8129, 6472	1.46	1113	0.9955	1113	0	0	1	6
GTF2B	ATATGAACAGAAGAGCCTGA, CCACTAAAATCGCATCTGGA, GCAATTCTAAGTACCAGAAT, GGCGGGACATACTAACCGGC, TTAGTGGAGGACTACAGAGC, TTATTGATGTGGGATCTGAA	6	7380, 7074, 4382, 8102, 8167, 5967	1.46	1111	0.9955	1114	0	0	1	6
SUPT6H	ACAAATTTCTTGGTGACTCG, ATACAATGATGAAGGCGAGG, CAGAGGAGAAAGCAATGCCG, CGAGACAGAGCAGTTTCCCG, CTACCGACCAGATCAGCAGG, GCTGTGATTACCTAGACCGA	6	7199, 6588, 8770, 8332, 1322, 6002	1.47	1115	0.9959	1115	0	0	1	6
CENPW	ACTCGCTTTAGAAAGCCACG, AGACTCGCTTTAGAAAGCCA, ATAAAGCGGAAGGCTCCCCG, CCCAGAGGAAGCAGATAAAG, GAGGAAGCAGATAAAGCGGA, TGTCGACCATAGTCTCCCAG	6	8861, 8849, 8934, 6280, 6004, 3101	1.47	1116	0.996	1116	0	0	1	6
LSM10	AGCCTGATCATCCTACTGCA, CAGCTGGTGTGGAAGAATGG, CCTGGCCAAAGTCACCTACA, GGGCCACGCTCTCATCCCGC, TGCTTTCATGAACATCCGCC, TGTAGGTGACTTTGGCCAGG	6	8592, 3230, 6061, 7702, 6774, 8166	1.48	1126	0.9961	1117	0	0	1	6
PIAS1	AGTTAAAGAGAAGTTGACTG, ATAATCTTACCTAGACTGGT, GCCAGCCTTTAGCAAATGCA, GGAGTAATGGCGATGATGCA, TAGGTCCCAGAAGAGAAACA, TTAAGGAACTCTATAGGCGG	6	5747, 6483, 6522, 6026, 6479, 7342	1.47	1119	0.9961	1118	0	0	0	6
ACTR8	AGGCTTTGTCTGGCATACGG, ATAATGACCCAGGCTGAGAA, CCCGAAGACACAAACAACAA, GAGAACGGAAAGGAGAAGGG, GAGAAGGAGAAGGAGCAGCG, GGTCAGTTAAATATTCACCC	6	8691, 6041, 4223, 8021, 8402, 8022	1.47	1124	0.9961	1119	0	0	1	6
CXXC1	CCGACAGTACCACTCCCGGA, CTATCGGCACAAGAAGTCAC, GATCACTGAGAAGATGGCCA, GTACAAGTACTTCCCTTCCT, GTATCAGGACTTCTGTGCAG, TCTTCTGTGTCGCTCATCCA	6	8815, 7902, 8277, 6040, 8010, 5490	1.47	1123	0.9961	1120	0	0	0	6
CD3EAP	CTCTCTGTAGCTTCAATGGG, GCGCCTCCAAGGAGAAACGA, GGCACCCTAAGGATCCTTGA, GGGACCCTCAAGGATCCTTA, TCAGCAGCTGAAAGAACCAG, TCTGGCTCCCAGATCGTCAA	6	8922, 8879, 7958, 7496, 1982, 6035	1.47	1121	0.9961	1121	0	0	1	6
MED7	ATATATTGCATTGGAGGTGG, CGATGCCCTGACTTTCCAAA, GGAAGTGCACTCACTTGCTG, GGATGATAAGATCATCACAT, TGCCCTGACTTTCCAAAGGG, TGGAAAGTCAGGGCATCGAA	6	6958, 6095, 6565, 8081, 6023, 5480	1.47	1118	0.9961	1122	0	0	0	6
H3F3A	ACTGCCCGCAAATCGACCGG, AGAGGGCGCACTCTTGCGAG, AGAGTGCGCCCTCTACTGGA, AGTCTGCTTTGTACGAGCCA, CAGACTGCCCGCAAATCGAC, CGACCGGTGGTAAAGCACCC	6	8846, 6013, 8600, 7164, 5424, 8853	1.47	1117	0.9961	1123	0	0	0	6
BRD1	GAGGCCTCTGAATATTTACG, GCAGCAGTCTCTGATCGACG, GCCGACCTCTGGGATCCACA, GGTGGAGTATGACATGGACG, GTAGCATGTCAGTTTCCACC, GTTCATCGAGAAGTCGGCCG	6	6789, 5472, 7186, 6287, 6034, 6646	1.47	1120	0.9961	1124	0	0	0	6
POLR2I	AAGCGAATACCCACGAAGCC, GAACCGCATTCTGCTCTACG, GAACTGTGATTACCAGCAGG, GCCCGGCTCGTAAGTCCCGT, GGTTCTCCTTGTCTTCCTTG, TCACCGCGTAGAGCAGAATG	6	1069, 7865, 8306, 6056, 8373, 8746	1.48	1125	0.9961	1125	0	0	1	6
ZNF281	ATGGAACCCACCTTTCCCCA, CATCAAACAGGAGAAACCCG, CCTCGCAGAGGACCTCCTGG, CCTCTGCGAGGGGAAGGCCG, TGCTGAGTAATACGTCACGG, TTGAACATAACCATACCCTG	6	6072, 6926, 7274, 8105, 1928, 7587	1.48	1127	0.9962	1126	0	0	1	6
HNRNPC	ACTACAGCCCGAGCAATAGG, ACTTGGACTATGACTTTCAA, AGGTGTGAAACGATCTGCAG, CTTGGACTATGACTTTCAAC, GATACACGCTGACGTTTCGA, TGTTAATGAGAGAAATGCCC	6	7522, 6126, 6083, 7654, 6043, 6566	1.49	1129	0.9963	1127	0	0	0	6
PCGF1	ATTGTTTGCTGCCTATGCGC, CGGGAATTCTACCAGTCCCG, GAGGGTGTATCTTCAGGAGG, GCTCCAGTCAGTGTACAAGA, GGTGGCATCCACGAAGTAGC, TCCAGTTTGAGGTTGAGCAG	6	7882, 3259, 6078, 7799, 8778, 8229	1.48	1128	0.9963	1128	0	0	1	6
CCNH	AGTGCCTTCTCCTGTCCAAG, CAAATTCAGATGCAAAGCCG, GCACTGGACCTTCTCCAGCG, GGAAAACCTCACCTTCCCGT, GTCCAAGAGGACTCTCCCGG, TTTGCATCTGAATTTGCGGT	6	5820, 7648, 8185, 6098, 8703, 7443	1.49	1130	0.9964	1129	0	0	0	6
WDR92	ATAAATGCCATAGATGGCAT, GATCATCGCCCATATCCAGA, GATGATCTGAGGCTTCTCGA, GCTGTACGAGATCCAGCACG, GGAGCACCTGAAATTGTGAC, GGTGGACTAGGAATTGGAGA	6	6132, 8245, 8543, 8867, 7518, 5898	1.5	1134	0.9964	1130	0	0	0	6
ELL	ACGACTCCTACCAGAAGGCG, AGAACGTCCGCGCCTCTGCG, ATCGGCCGCGACAACCCCCA, CCGATTTCAAGGAAGCCAAG, GGTAGGGCCGTAGTGCCAGG, GTAGCTCTCGAAGGCCCTCA	6	7390, 6108, 4999, 6790, 7691, 6924	1.49	1132	0.9964	1131	0	0	1	6
TBL1XR1	AATAAAGCTGTTGTGTTGCG, ATGCTAGGAGATCACTAACA, GACATTGTATACGAGAAGGA, GATGATAGAAATCAATGCAG, GCAAGATGTTCCAAGCAACA, TTAGTGATCTCCTAGCATCA	6	8319, 6499, 5804, 7220, 6101, 7722	1.49	1131	0.9964	1132	0	0	0	6
KDM5A	ATCTACTCTGAAGATCCCTG, ATGCGGCCGATAAAGCTGAG, CCACTACCTGATGTGCCCAA, TATCACTCTGGATTTAACCA, TCTCTGGTATGAAAGTGCCG, TGGAGATGTGAGTAGAAACA	6	7561, 1648, 6121, 7331, 7579, 6396	1.49	1133	0.9964	1133	0	0	1	6
POLR3D	ACAGAGACCGACAACGAGAG, CCTTCCCTCCATCCGTTCCA, GAGACTGGATCACTTCTGGA, GAGTGTCGTTCCTCAGGCCG, GTACCTTCTTGACTCCCCCG, TCACCCCAAATATCATCAGT	6	6148, 7743, 7502, 4558, 8171, 8152	1.5	1135	0.9965	1134	0	0	1	6
GTF3C1	CATCACTCCACCCCAACCAA, GATGCCATCTTGAATGACAG, GCACCCTGCCAGCAACACCG, GCTTCCACCATTGTACAGCG, GGGGATGTAGCGCATCCACG, TCTTCAGGTGGACAACCTGG	6	5929, 6182, 6931, 8848, 8048, 7152	1.51	1139	0.9967	1135	0	0	0	6
TAF5	AAGTACATGTGCACAAACAG, ACGGCAGAGCAAACTCCGCG, CTGCCGTAGGAACTGCAGCA, GCACGGCCAGTAGAGTCTGT, GTTGGGACAACTCTGCCCGA, TCTATCTGTTGCTTACTACG	6	7862, 6930, 6179, 7893, 8813, 2175	1.51	1138	0.9967	1136	0	0	1	6
MED9	AGCGGCTTGGTGTCAGGCAG, AGTTCTCTTCCTCCCTCGCG, GGTGGCAGCCGGGCGACAGG, GTTCTCTTCCTCCCTCGCGC, TACATCCTCCGCCTGTCGCC, TCAGTCACCTGCCCGCGCGA	6	2283, 6731, 7603, 8481, 6187, 8240	1.51	1140	0.9967	1137	0	0	1	6
TADA2B	CTGCGTGTACTGCCTGGCCG, GACAGGTGTGGTCTGTCACG, GCTGGTAGCCGTGGTAGCGG, GGGCGGCTGGACCAGTCGCG, TCAGCCACAGAGATGTCCAG, TGCTTCCCGGACTCCCCAAG	6	4191, 6322, 6176, 6776, 7442, 8006	1.51	1137	0.9967	1138	0	0	1	6
POLR2J	AGAACGACTCGAAGGCTGGA, GAACGACTCGAAGGCTGGAG, GAAGAGCAAGAACGACTCGA, GAGTCGTTCTTGCTCTTCGA, TCCTTGTTAATGGTGATCCT, TGTGTGGTCTTCTTTGTTGA	6	6680, 6167, 8990, 8530, 8073, 4104	1.51	1136	0.9967	1139	0	0	1	6
TONSL	ACATTCCCTGCGCAACCACA, ATTGTGGATGAGGAGCTGGA, CCTGAAGTAATCGTTGCACA, CTATGACCACTGCCAGTCGA, TAGCTGCTCACAGATGACCA, TCTCCAGGTCCAGGTCCCTG	6	7719, 8143, 6192, 8636, 9066, 1247	1.51	1141	0.9969	1140	0	0	1	6
PLRG1	AAGTGAATACCGACATCCTG, CCCACCGTGGAAACTCTACA, CTACAATGCCAAAACCCCAG, CTTCAACGACCTGAACACAA, GAAGGGTCCTCAGAATGCAA, GGGCATATTAGTACTGTGCG	6	6791, 6218, 8157, 6971, 4211, 8833	1.52	1142	0.9971	1141	0	0	1	6
CENPA	CCGCCGACTGTGTTGATGGG, CCGCCGGAGCCGAAAGCCCG, CCTCCCATCAACACAGTCGG, CTTCCTCCCATCAACACAGT, GCCGAAAGCCCGAGGCCCCG, GCTCGGGCTGCGCCTCCTCG	6	8702, 8640, 7802, 5801, 8231, 6224	1.52	1143	0.9972	1142	0	0	0	6
HMCES	AGAAAGTCTGGGACAACTGG, CAGCGTCTTCCCTTTCCCAG, GATGTCAGGGAACAAACCAG, GCAGCGGCTCCCGGAGTGGA, GCAGTCGAGACAGAAGCACT, TAGCAGATGGATTCTATGAG	6	3592, 6498, 6225, 7170, 8225, 8196	1.52	1144	0.9972	1143	0	0	1	6
MED22	CAGGGCTCTCTGCTGGGCCA, CGAGATCATCAAGACCGCCA, CTGGCCACTCACGATGTTGG, GATCATCAAGACCGCCAAGG, TGATGGCCACAGGTCCGAGC, TGCTGCAGTCCTACAACAAG	6	8015, 966, 8837, 6237, 6934, 6353	1.52	1147	0.9975	1144	0	1	1	6
ZNF217	AAGAACTGCTGGTTCACAGA, AGCTCGGAATGGAACAACAG, GAGCTTGGAGAAACAAATAA, GCGCAGACAGACTCTCCACA, GGTCCACAAGAAGGACCGGA, TAGTCCAGCAACGATCAACG	6	7812, 6115, 6234, 8124, 7221, 7123	1.52	1146	0.9975	1145	0	0	0	6
SMARCA4	ACCCCCATCCAGAAGCCGCG, CCTTTCATCTGGTTGTAGCG, CTAGGTATGAAGTAGCTCCG, GCATGCTCAGAGCCACCCAG, GCTCCTGCAGGATCTCCACA, GGATCTTCCCACTCTCCACG	6	4681, 6231, 7813, 7874, 8704, 7383	1.52	1145	0.9975	1146	0	0	1	6
WBSCR22	AATCTCACCCAATATCCAGC, GCTGTGGACCGAGAGATAGA, GGCGTGAGAATGGCGTCCCG, GTTTCTGCCTTACCAGCTCA, TTAGCATTTCTGCTGTGCAG, TTTATGACGAGACAGAAGCC	6	2649, 6428, 8758, 6242, 8587, 8153	1.52	1148	0.9975	1147	0	0	1	6
SMARCA5	AATCTTCAGTCAAATGACAA, AGTGTGTTTAACATACACGA, GCAGCCTCGATCGCCAGCGG, GGGCCTCAGCAAAATGCAAA, TCAGTTGTCAGAAATAGTGA, TTGTTCTTAGATGTAAAATG	6	6432, 8677, 6243, 840, 7399, 7585	1.52	1149	0.9976	1148	0	1	1	6
PIF1	CCTCTTCACGCGTTTCGCCG, CTGATGGTGACGAAGTCGCG, GAAACGCGTGAAGAGGCGCG, GCGCCAGGCCCTGCGCACCG, GCGCGCAGAGGAAAGCAGCG, TCAGCTCCTCCACAGCCACG	6	574, 6611, 6249, 7641, 7606, 6418	1.53	1151	0.9977	1149	0	1	1	6
ACTR6	CTGGGGCTCTCAGTGCACAT, GGAGCTTACAACGCCAAAAT, GGATGTAAAAGAGTCCAGAA, GGATGTTCAGAGACAAGTTT, TGAGATGACGACCTTAGTGC, TTAGGGCTACTTGGTGAATT	6	6258, 7332, 8382, 7751, 8355, 3407	1.53	1152	0.9977	1150	0	0	1	6
CCAR1	ACAACACGTCGAACTCTCCG, GATTCGCTACCATCGCCCTG, GCAGGAGGAGTCTTCAGTAA, GCAGTCTTAATCAACACAGA, GCTGAAATGGTCTTGACAAA, GTAAACTGAGTAGCCCATGG	6	8320, 8719, 5954, 8535, 6247, 8417	1.53	1150	0.9977	1151	0	0	0	6
SMC3	ACAAAAGCAGAAATAACACG, GACAAGAGCAGATTAAGCAG, GGATGCAAGAGATAAAATGG, GTCATCTTCGTCCAGAACAG, GTGAAAGAGAAAGAAGAACG, GTTTACATCAAAAGAAGAAA	6	6264, 9017, 8996, 7524, 5503, 6915	1.53	1153	0.9978	1152	0	0	0	6
RNF40	AATGGGCTCGATAAGAGTCG, CCGATGCCATGAGAGCCAGG, GCTCCAGGATAAAGTGACAT, GCTGACAGAGTTCCTCCACC, GGACTCCTCTCCCAGAGCCG, TGTCAGCGAGTGTACAGCCG	6	5246, 8841, 7454, 7114, 6268, 7693	1.53	1154	0.9979	1153	0	0	0	6
CSNK2B	CACAGAAGAATTCATTGCCA, CGCTACATCCTTACCAACCG, CGTGAAGATGAGCAGCTCAG, CTAGAGCTTGTCGATAGTGA, TCACCATCTGGGCGATGCCA, TCCTGGTTCTGTGGGCTCCG	6	6303, 8276, 8945, 1100, 8282, 6984	1.54	1158	0.998	1154	0	0	1	6
RBM8A	CTTTGTAACTGGAGTCCATG, GAAAAAGCGAAGAAACGGAA, GCCATGGATGAGGATGGGGA, GGACGTGCTAGATCTTCACG, GTATGTCCCTTATAGAAGAG, TGGGGGCGAAGATTTCGCCA	6	5214, 8241, 7367, 8452, 6292, 8505	1.54	1157	0.998	1155	0	0	0	6
CHD8	CTCAAGCCAAGAATGCCCAA, GATGAGACACTTCTTCCATG, GCAAGATTCGAGAATTTAAA, GCCCTATGAGGATAGCACAT, GCTTACCACAAAGAACTGCA, TCTGGTGCCTCCAAAACAAA	6	7974, 8538, 2141, 8796, 8716, 6284	1.53	1156	0.998	1156	0	0	1	6
DIDO1	AGCAGTTCCTGACCATTGCG, CCAGCCTCACAACAACAGGT, CCTGCGGAAGAAGCGCCGGG, GAGGCCAGTGACACTGTGGA, GGAGCCCGAGAACGATCAGG, GGGCTCACCAGAATCCTCCA	6	2932, 7998, 8406, 8346, 6951, 6282	1.53	1155	0.998	1157	0	0	1	6
ACTB	ACACTGTGCCCATCTACGAG, GATAGCAACGTACATGGCTG, GCCGCGCTCGTCGTCGACAA, GCCGTTGTCGACGACGAGCG, GGAGTCCATCACGATGCCAG, GGATTCCTATGTGGGCGACG	6	6355, 6443, 4915, 6385, 8871, 7363	1.55	1161	0.9983	1159	0	0	1	6
MBTD1	ATAAACTACTTACTTCTAGG, GATTCTTTCGGGATGTTTGA, GCAATCCAGAAGACTTTGGT, GGTTCTGATATCCATCCAGT, TTACTCGTCAAACTCCAAGA, TTACTTCTAGGAGGAACAAG	6	6896, 7101, 8146, 8092, 5374, 6327	1.54	1159	0.9983	1160	0	0	0	6
TCEB1	AAAGCCATGTTGAGTGGCCC, ACGATAAAAGCCATGTTGAG, AGAGAACATGCATTAACATC, GTCAAATTGATATCATCTGA, TGATATCAATTTGACATACA, TGCTGAGAACGAAACCAATG	6	6378, 8279, 7573, 8088, 8068, 3245	1.56	1165	0.9983	1161	0	0	1	6
MORF4L1	ACAGCACCTGGAAATGGAGA, GCACCTGGAAATGGAGATGG, TCAGCCTCCTCGGAAGAAAA, TCCCAGTCATCAACAAGCCA, TTCCTGAAGAGCTAAAACCG, TTTCTTCCGAGGAGGCTGAG	6	6369, 8787, 6723, 8301, 8140, 4416	1.55	1162	0.9983	1162	0	0	1	6
BAG6	ATTGGTAGAAGACGGAGCCA, GCACCTCGACATACTCCGCA, GCATCCCATCTGAAAAACAA, GCTCAAGGCTACTGGCTCCG, GCTGGTTGTGCGCAGCACGA, TTACCCTTTCCCCAGAGTGA	6	6329, 5516, 7338, 7460, 7298, 6574	1.55	1160	0.9983	1163	0	0	0	6
NFYC	AGAAATCCGGAATTTAACAG, AGTCCAGTACTATTTCACGC, ATCATCGCACAGCCTCAGCA, CGGATTTCTTCCATGACCCG, GCTCGGCAGGAGTTACAGAC, TCTTCTTAATACGAGCCAGT	6	6901, 6376, 6400, 1787, 7119, 7267	1.56	1164	0.9983	1164	0	0	1	6
TAF10	GCTGCCCTCCAGCACCGCCG, GCTGGCCTTGTTCTCCGCGG, GGAGAACAAGGCCAGCCCCG, GGAGGGGGCCATATCTAACG, GGGGCTGGCCTTGTTCTCCG, GGTGCTGGAGGGCAGCGCGG	6	7701, 6824, 8456, 6383, 1751, 8463	1.56	1166	0.9984	1165	0	0	1	6
GTF2H2C	AACAGAGTATTTGAGCACCA, ATAGATGCGCCACCTTTATG, CATCTACTACCACATAAAGG, GTTGTTGGAATACTTTGTAG, TTCCAAGTCGAACTTGTCCA	5	7004, 8271, 8419, 6778, 8559	1.47	1122	0.9985	1166	0	0	0	5
WDR77	AACGGCAGTTGGAGGCTGCG, CTGCTCCGCCGGAGTCCAAA, GCAGAAGCCTTCGTTGGGGG, GGGGTCCTTAAAAAGCCAGA, GTGGTACTGAGTTCATACCG, TCTGGCACACAAGCTGTCAG	6	9035, 6458, 5715, 8885, 8897, 9082	1.58	1168	0.9987	1167	0	0	0	6
SENP3	AGATGAAAGAGACTATACAA, CAGCTTACTCAAGTCCCAGG, CCTCCACCTGACTTGAGTCG, CTTTCATGTACTCTGCCCAA, GATTGTCCCCCAAAACCGTT, GCACCTAGCAGACCCAGCCG	6	6433, 7235, 7523, 6743, 4728, 8145	1.57	1167	0.9987	1168	0	0	1	6
POLR1C	CAAACTCCCCCAGAACCACG, CCATGTGTACTACATCCACA, CCCCACTTACCTTCTCGAAG, GGAGGAAATGCGGAGCCGCG, GGTTCACGTACAGTTCGTTG, GTCCCTCTAGAATTTCCGTG	6	8134, 6467, 4758, 8889, 8482, 8433	1.58	1169	0.9988	1169	0	0	1	6
UPF1	ACTGTAATACCAGCAAGAAG, ACTTCCACACAAAATCCACC, GCAGGGCCAGAAAAGACACC, GGTGACTCACAACTTCCAGG, GTAGATGTAGCCAGACACCG, TGTGAGGGCAAAATGCAAAG	6	6881, 6523, 6703, 6154, 8123, 8084	1.59	1172	0.999	1170	0	0	0	6
UBE2I	AAGCCCTCCTTACAAATGGG, CTCCTGGGCGAGTCTGCTGA, GCGCCATTCCAGGAAAGAAA, GTCCCAACAAAAAATCCCGA, TTAAACAAGCCTCCTTCCCA, TTATTTCCCCACAGACTCCG	6	8262, 4984, 6516, 7658, 8446, 7755	1.59	1171	0.999	1171	0	0	1	6
PHF8	GAGTACATGGTACCAGACAG, GCTCATTAAAGATCTGGCCA, GGAGCTCTCTGACGAACGTA, GGCTTAGTGAAAAAACGCCG, GGGCCGAGCGAAGATGGCCT, TGCTCCTTACTTCCACCAGG	6	8440, 7906, 6832, 2209, 6534, 7725	1.6	1173	0.999	1172	0	0	1	6
BCOR	AGTTAGCAGCGAGTTCCCCG, CTCGGAAAACCGATTCCGGA, GAATCCCTTGAACCACAACG, GGGCTCAGAGAAAGGTCGGG, GGTAGGTCACAAACTCTGGA, GTGCAGACTGGAGAATACAG	6	8239, 6513, 3644, 8019, 6699, 8881	1.59	1170	0.999	1173	0	0	1	6
MSL3	ACTCTCTGTGGACTGTGGCG, AGTTCTGAAGAAGCAGCTGG, ATTGTTACTACATTAACAGG, CATCTTCCCTAGGAGCCAGG, CTTTGATTACACTCTCCCGT, GCTGCTTCTTCAGAACTTCA	6	6542, 8216, 7803, 7341, 8412, 1748	1.6	1174	0.9991	1174	0	0	1	6
H2AFB1	ACTCAACGCCCAGCATGCCG, ATAACCGCAGCGAGGTAGAC, CTGAAAACGAAAGCTCCGCT, CTGCTCTCGCACCGTCCGAG, GGCGCCGGTCTACCTCGCTG, GGTACTCAATAACCGCAGCG	6	7950, 7790, 6545, 5405, 7766, 6594	1.6	1175	0.9991	1175	0	0	0	6
EZH2	AGAAAAGCAGAAAGATCTGG, AGAAGGGACCAGTTTGTTGG, CAACACCCAACACTTATAAG, CTGCTGCTCTCACCGCTGAG, TTATCAGAAGGAAATTTCCG, TTATGATGGGAAAGTACACG	6	6564, 6507, 8217, 6681, 7739, 8909	1.6	1177	0.9992	1176	0	0	0	6
MED20	GCAAGGGCCATTCTCAAAGA, GGACTGTGAGACTTACCATA, GTGCTTATGGTGAAGCTCAA, TCACTGACCTTGGCTGCCAA, TGGTGTCAGCAATAAGGCAA, TTTCCGGGTAAGGAGCTCTA	6	542, 6845, 8009, 6552, 8453, 7261	1.6	1176	0.9992	1177	0	1	1	6
PPP4R2	ACTTCAGCTCCTGAGCCAAG, ATAGTCGCTGAATAGTAAAA, CAGCCCCCATGACAACAAAT, GGAACAGACAAATTTCTCAG, GGACGTCGAGAGGCTCCAGG, GTTCCTGTATAGTTTCTCCT	6	6724, 7839, 6375, 8914, 8891, 7428	1.64	1194	0.9993	1178	0	0	0	6
NCAPH	CCTGATGTCTCCATCCCCAA, GCCCACATCGACATGGTCCG, TCAATGTCTCCGAAGCAGAT, TGATGAGTGCAGCACAGCAG, TGATGTCCAGACTCTCTCCA, TGTAAACTGGAACCCGGCCA	6	7236, 8475, 6604, 5307, 7091, 8808	1.61	1183	0.9993	1179	0	0	0	6
WAPAL	ATAAGAGGAACACTTAACCT, GCCTGAATCAGGCAAAGAAA, GGATACTATGGAACGCAGCA, TCAGAAATATCTCCAATCAA, TCATCACTATCAAATCCAAA, TTACAAACTGACAAGCAAGA	6	8193, 7378, 8391, 6663, 3586, 7160	1.63	1187	0.9993	1180	0	0	1	6
U2AF1	CGTACACGTTCCCCACCAGG, GGAGAAGTATGGGGAAGTAG, GTTTCGCCGTGAGGAAGATG, TCACGGGTGACAGCTCGGCG, TCGGCTGTCCATTAAACCAA, TGATTGACTTGAATAACCGT	6	8564, 6719, 6614, 8649, 8784, 8139	1.64	1193	0.9993	1181	0	0	0	6
NAA50	AGGTGCAGTATGCTGTAGGG, CCTATTCCTAGCCTTCGGTA, CTACAATGACAAGTTCTACA, GTTCTACAAGGATGTGCTGG, GTTGGCGAGCTAGCAAAACT, TGTAGGTGCAGTATGCTGTA	6	6980, 8805, 8154, 6404, 6586, 8669	1.61	1179	0.9993	1182	0	0	0	6
ACD	ACTACAGGACGCCGAGGCCG, AGAATCAGCTCCCGAATCCA, GCAGCCGGCCCTCTGTCCCG, GCTTCTGGATGAAATGCGGG, TCAGGTACTACAGGACGCCG, TCCTCTTCCGAGGAAAGGCG	6	3262, 8305, 8918, 7391, 8376, 6599	1.61	1181	0.9993	1183	0	0	1	6
TADA2A	AGCAGGGTAGATGCAAACAG, AGTGAGTTACCTGCAAGCAG, CGGCAAGGTGGCTTATCAGA, GCAGGGTAGATGCAAACAGA, GCTGAACCTGAAACAAGCAG, TCTGATAAGCCACCTTGCCG	6	6602, 8489, 7810, 7946, 3845, 8480	1.61	1182	0.9993	1184	0	0	1	6
TADA1	ACTGGGCTAACCTAAAGCTG, CTATCATTCTCCCTTCAAGC, CTGTTTCACGTTGTCCCCCA, GCAAAACCTGGAAAACCCAA, GGCCAAGAAGAACTTAAGCG, TAGTGACTGCTTATGAGCAT	6	8394, 2829, 8179, 6697, 8674, 8527	1.64	1190	0.9993	1185	0	0	1	6
POLR1A	AGCACCTTCATTCTTCCACA, CCAAGAACAGAAGTTGCCAG, CCAAGAACATGCCCTGGCGG, GCTCATAAATATAATCCCAG, GGACAGCCTGGGGAACCCAT, GTAAGAGGTGAATCACGGCC	6	8220, 6062, 6707, 8532, 6673, 6882	1.63	1189	0.9993	1186	0	0	0	6
RBBP4	AGTGGCTTCCAGATGTAACC, GCATTCATCGACTTGTCCTG, GCTGGGCCACTCCAGAGCAT, GGCCCAGCCTAACTGCCCAG, GGTTACATCTGGAAGCCACT, TGTCCTGGGGACACACACAT	6	8561, 6610, 7632, 7962, 7670, 6600	1.61	1184	0.9993	1187	0	0	0	6
POLR2D	CGGCGGGTGGCAGCGATCCG, GCAGCAGAATGAGAGTGCAG, GCGCGGCGCGGCGATGGCGG, TCACAGCTCATCTTTCCTAA, TCCTCTACGTCGCCAGCCCG, TTTAGGAAAGATGAGCTGTG	6	8283, 6587, 8947, 4541, 7627, 6879	1.61	1180	0.9993	1188	0	0	1	6
RNF20	GCACAATCACTATCAATGCT, GCTGAACTCTTTCCTCGCAC, GCTTGAGGAGAACAAAGAGT, TAGCTACCTGACTCCAGTAT, TGAAGATTCAGGGACCACAG, TTCTGGTTCAGGCACAACAA	6	8363, 8566, 6968, 8238, 3057, 6649	1.62	1186	0.9993	1189	0	0	1	6
POLR3A	AAGCAAATCTTGTAACCCCG, ACATACCCCCATCAGAACAA, ACCAACTCAACAGCTAACCG, CGTGTGAGAATCAAATCAGA, GCATGGACAAAGGAACCCTA, TCGAGCACCCCATATAGCAA	6	6775, 7329, 8118, 6702, 6960, 3802	1.64	1191	0.9993	1190	0	0	1	6
POLR3F	ACTAGTATATCAAATCATAG, ACTTGGTCTGTGATTCCATG, CTTGGTCTGTGATTCCATGA, TCACCTTCACCTCCGCCATG, TCATATAGAAGCCCAGCAGC, TCGACCGGATCCGCGTCAGG	6	7601, 6892, 7404, 7633, 6666, 4064	1.63	1188	0.9993	1191	0	0	1	6
KAT8	CCATACTTACAGTTAACCGG, GAAGAGCTACCGCTTCCACT, GCTGTTTCCCATAGTCTTCG, GGAATTCTATGTACACTACG, GTCTCGAGTGAACGACCAGG, TCTCGAGTGAACGACCAGGA	6	9046, 4639, 6944, 6647, 7263, 8937	1.62	1185	0.9993	1192	0	0	1	6
CSTF1	AAAGAGTTCGAATCACTGGG, ACCAATTGCATACTGAACTG, ATACTGTTGCCCCTGGCACA, CTATAGGTAGCTACACGGCA, GATCCTGGCTTCTGGTTCAA, TCAGCTTGTAGAGCTGCTGG	6	689, 6575, 7529, 7486, 7911, 8449	1.61	1178	0.9993	1193	0	1	1	6
ALYREF	CCCTGCTGTAGGGCGCCGGT, CCTGGGAGCCGGCCCGGCCG, CGGCCTGCGCCCCACCGCCG, GCCGCCTCGATTCACTCGCG, GCCGCGCGAGTGAATCGAGG, GCCTCGATTCACTCGCGCGG	6	7258, 4676, 8521, 6728, 8656, 7763	1.64	1195	0.9993	1195	0	0	1	6
INCENP	AGCCAATGCCATGGTAGCCG, GATGCTGACTAAGAAGCCCG, GCGTGGAGAAGTTATCCGGC, GCTACACCCCAGGACCCCAA, GTGGCTTGAGGAAATCCAAG, TCACCTGGTGAACATGCGCT	6	7314, 6793, 975, 7747, 8968, 8717	1.66	1205	0.9994	1196	0	1	1	6
DLD	GAGAAAAATGAAACACTTGG, GCAGTAAAAGCTTTAACAGG, GGTGGAACATGCTTGAATGT, GTTATAGGTTCTGGTCCTGG, TGATCTGCGTAAGTTCTCAG, TGTGTACTGCTCCTTGGCCA	6	6572, 7211, 8036, 8485, 7040, 6863	1.68	1216	0.9994	1197	0	0	0	6
FTO	ATAGAATTCATCATCTTTGG, GAGGAAGGTCTCACAAGCAG, GCATCATGATGAAAATCTGG, GTCTAATATAAAACACACCG, TATGTCTGCAGATTTCCCCA, TTAGACCCTTTCACTGGCCA	6	7136, 8354, 7681, 8613, 6750, 3297	1.65	1199	0.9994	1198	0	0	1	6
SMYD5	ATAAGCTTCAGGAGGCATGG, GCCTCCTGAAGCTTATTGAG, GCTTATTGAGAGGATGCAAG, TCTCTAGTGCCCTAAGGCAG, TGATGCTTGCAGTCTCAGGT, TGTACTGCAGTGCAGAATGT	6	6656, 7093, 6888, 8266, 6853, 7449	1.67	1215	0.9994	1199	0	0	0	6
MNAT1	ACTCAGAAAGAGCAACTTCA, GCAACCCTGATCGTCCATGG, GGTGTAAGACCACCAAATAT, GTAGATTTACTGTTTGTGAG, TATTTGGTGGTCTTACACCG, TGGACGATCAGGGTTGCCCT	6	6802, 8860, 876, 6839, 8732, 8572	1.66	1206	0.9994	1200	0	1	1	6
TOP1	CCAGTATTTCAAAGCCCAGA, GCTATCCTGAAGGCATCAAG, GGGCACACTCACCATTCAAT, TCAGCATGCCCATCTTGGGG, TGTCTTCCAGAAAATCAAAG, TTATGGATAACCACAAAGAG	6	6748, 8907, 3698, 8857, 8202, 8964	1.65	1198	0.9994	1201	0	0	1	6
BRE	AGGATTTGAAGGATTCCAGG, GACCACGCTAGATATGAAAG, GGACCACGCTAGATATGAAA, GTACTCACCTGCAAAGCTGA, TCTCCAAAGATAAAATCGGG, TTACCTTGAGAAGGTATGTG	6	7696, 7664, 6808, 3561, 9008, 7027	1.66	1207	0.9994	1202	0	0	1	6
EPC2	AAGCCGCTGCCTATCTACCG, GAAAACGTAAAAACTGCAGG, GAGAAAACGTAAAAACTGCA, GATCAGGCATGTCCTTGCCG, GTAAACTCTCCTTCCGAGCG, TCCTCCTTCTCCATCCCGGT	6	8292, 6768, 4809, 7237, 8045, 7885	1.65	1203	0.9994	1203	0	0	1	6
PAXIP1	AGCCTCACACATAATCTCAG, CAGGGAGGTCAAGTATTACG, GATTGTTCCAGAGCCAAAGG, GCAAAACGCAGGCTGCCTCA, TCCTGAGGAGATGTTCAGGG, TCTCAAGGCTGGAAAAGCGA	6	8545, 8755, 6816, 3577, 8548, 8992	1.66	1208	0.9994	1204	0	0	1	6
BRCA1	AATCACCCCTCAAGGAACCA, GAACTCTGAGGACAAAGCAG, GCAATAAGTTGCCTTATTAA, GTAAGAATGATATAACCAAA, TCAGAGTTCTCACAGTTCCA, TCTTGTGCTGACTTACCAGA	6	7754, 8056, 4015, 8273, 6871, 7903	1.68	1217	0.9994	1205	0	0	1	6
MNT	AATATGAGCATGAAATGGAG, CCCACCCCCACCCTTGCCCG, CGTCCAATCTGAGCGTGCTG, GAGGGGAGTTGGTCACCACA, GATAGGGATGACAGTCAGTG, GCTATGGTCAGGACAGGCGT	6	7904, 6272, 8516, 8163, 8106, 6822	1.67	1209	0.9994	1206	0	0	0	6
PSIP1	ACTTACTCGAGCTGGCCAAT, AGATGAAAGGTTATCCCCAT, CTACTCCAAAAGCTGCCAGA, TAGGTAGACGAAGTTCCTGA, TGAAGAAAAAGCCAGCAATG, TGAGTTCCAAAAAAGAAAAT	6	7800, 8469, 7333, 6745, 7852, 2043	1.65	1197	0.9994	1207	0	0	1	6
CSRP2BP	CAAATTCCTGAGCACCTGAA, CCTGTAAAATTCATAAGCCG, GCACCTGAACGGAAGTACAT, GCGATGGAGTCATAGACCCA, GCTAGGTGTGGCAGAATGAG, GCTCCTGTCAAGAAAGCCAG	6	7269, 7704, 6838, 7706, 2104, 7225	1.67	1213	0.9994	1208	0	0	1	6
SUPT16H	ACAAAATTACCAAAAACCTA, AGAGACTGTACAGCAATTGG, AGCTCTTCATGAACTCTCCA, CCACCACTCTGAATGATAGG, GAGACTGTACAGCAATTGGC, GTATAACGCTGTCATGGACG	6	4391, 7979, 6753, 8459, 8761, 7240	1.65	1200	0.9994	1209	0	0	1	6
TFDP1	GACCAAGGTGAGGAGTCGGA, GACCACTTCCTACAACGAAG, GCCGGTCTAATTGAAGCCAA, GGCAGCGTCAAACACCCTGG, GTGTGGGCTTCCTACCACCA, TGGAGGGGTGAACGGCCACG	6	7787, 7546, 8368, 7310, 6767, 6696	1.65	1202	0.9994	1210	0	0	0	6
POLR2A	AGGAGTTCTCCACAAAGCCA, AGTTGGAGCGGGAATTTGAG, ATACCAATGAGAGGGCCCTG, CATGTCTACGACCTTTGCAA, GTACAATGCAGACTTTGACG, TTCGGTGTGGAACAACCTGA	6	6831, 8563, 7940, 8164, 7254, 1998	1.67	1212	0.9994	1211	0	0	1	6
PRMT5	ATACAGCTTTATCCGCCGGT, ATGAACTCCCTCTTGAAACG, CTAGTCATCCCGGAGAAGCA, CTTCCATCCGCGTTTCAAGA, GGAGAAAAACCCAAATGCCG, GGTTGCTACTCACGTCACCA	6	6823, 9026, 1652, 8864, 8975, 8520	1.67	1210	0.9994	1212	0	0	1	6
PRPF31	GATGACGCGGTATTCAGGCG, GCTCTTAGCTGATCTCGAAG, GGACTCACCCATGATCTTGG, GGATGCCAACAACCTGACCG, TCACCGCCTCCACCACCCAG, TGCACTGGATTACATCCGCA	6	6840, 7797, 5937, 8205, 8552, 7993	1.67	1214	0.9994	1213	0	0	0	6
KDM2A	ACACTATGAAACCAGCTCCA, CGATTGTGTCAGGAGCCAGA, GAAAAGGAGAACAATCCCAG, GGAAACTTCACCAAGAGCCT, TCATAGCTCTCCTCACCTGG, TCTGTCTTCCTATAGATGGA	6	8343, 8836, 6744, 3989, 8924, 8309	1.65	1196	0.9994	1214	0	0	1	6
CDYL	ATTGTGGTCAGGAAGCAGGA, CTGCGGTCCTGCTCTTAACG, GCAGGGTCAGGAGGACACAG, GGGCCCAATAAAGCTCCGAC, GTGGCAGCGGAAAAGCCGGT, TATTGGGCCCCGGTGCCGAG	6	6987, 5661, 8762, 6759, 7716, 7618	1.65	1201	0.9994	1215	0	0	0	6
COQ3	GACTCTACAGATTAAACCAG, GCACACACACTCACCCGCCG, TACTGTACAGTCTCGCCCAA, TCACCCGCCGAGGAAATTAA, TCATTCCATGAATGACCTGA, TTAAGAGTGCTGGGGCCTGG	6	8888, 6827, 6865, 6290, 8966, 8667	1.67	1211	0.9994	1216	0	0	0	6
HIST1H2BJ	AAGCAGGTCCACCCTGACAC, ACTAAGGCGCAGAAGAAAGA, AGATGGAATAGCTCTCCTTG, CATGGCCTTGGACGAAATGC, GAAAAAGGGCTCCAAGAAGG, TCTGCTCCCGCCCCGAAAAA	6	8904, 6777, 8473, 8597, 8754, 5700	1.65	1204	0.9994	1217	0	0	0	6
CHD7	AGACGCGAGTCCGTTCCCAG, GCACGTAGCACAGATGACCG, GCATAAATGTGGTTTCTGAA, GCTGTGCTACAGTCTATGAG, GGAGAGGCATAAGTTCCCTG, GTAGGATTCCCATCAAACAG	6	8895, 7738, 7395, 7816, 6464, 6893	1.68	1218	0.9995	1218	0	0	0	6
AURKB	ATTCTAGAGTATGCCCCCCG, CCAAACTTGCCTTTGCCCAG, CCCTTGCGCCAGTTACCTGT, GCTCCTTGTAGAGCTCCCCG, TCTAGAGTATGCCCCCCGCG, TTGCCCCTCCCAGATCATGG	6	7285, 8426, 5980, 8773, 6897, 7430	1.68	1219	0.9995	1219	0	0	0	6
CDK9	AGTTCCCCATTACAGCCTTG, CACGCTGTCTGAGATCAAGA, CGAGTCGTACTGCTTTGCCA, CTACATCCACAGAAACAAGG, GATGGAAAACGAGAAGGAGG, GGTATATACTACCCTTGCAG	6	8075, 7077, 8821, 6899, 8313, 6111	1.68	1220	0.9995	1220	0	0	0	6
CDCA8	AGACCAACTCCTTACGGAGG, CCAAGACCAACTCCTTACGG, GCAGGATCTCGATGTTGTAG, GTCGAAGTCTTTCAGAAAGG, TCTACAACATCGAGATCCTG, TGGCCAAGACCAACTCCTTA	6	4704, 7897, 8768, 8961, 8542, 6947	1.7	1222	0.9996	1221	0	0	1	6
ASH2L	GCAGTGCTGTGTCTACTAGT, GGAAGCAGCGGAAAAGGACG, GGAATTGCAGCAGGAAGCAG, TCTTACTTGCTTGCTTCCGG, TGACAACCAGACAGAGACCT, TGTTAAACGGGTGTTCCAAT	6	3812, 6945, 6933, 8679, 7265, 7183	1.69	1221	0.9996	1222	0	0	1	6
DNAJC2	GCTGCTTCTGCCAAGCGCCG, GCTGGTGAACCAATAAAAGA, GCTTCAAACCATCTTCCCAC, GGAATTCCTTTCAAACACTG, GGATAAGAAAGAGTTATCCG, TAAAACATCACCCAGACAAA	6	5899, 7463, 8699, 6954, 7793, 7322	1.7	1223	0.9996	1223	0	0	0	6
WDHD1	AAGAAGCAGGGCACTAGTAG, AATCTGTGAGTGAGATGCAA, GATAATTTCATCTCTCAGGT, GCTCTAGCAGTTGAACTCCA, GCTTCAATATCCTCATTCTG, GTTCAAGGTATCTAGCAGAG	6	6973, 7676, 8705, 8461, 6314, 8336	1.7	1227	0.9997	1224	0	0	0	6
MLLT10	AGTATGAAGGAGATGATTGG, CGAGGTCTCCCATAGTATGA, CGTCCTCCAGTGACACGGGC, GCCCGTCGCAATAAACCAGC, GCCCGTGTCACTGGAGGACG, TGCCCGTCGCAATAAACCAG	6	7487, 7175, 6336, 7381, 6963, 7622	1.7	1224	0.9997	1225	0	0	0	6
CTCF	ACACTTGAATGGCTTCTCGT, GCACAAGCGCACCCACACCG, GCAGGCGTAAGGCTTCTCCC, GCTATGACTGTGTCACAGTG, GTGTGATTACGCTTGTAGAC, GTTTGTGCAGTTATGCCAGC	6	8004, 7932, 8540, 9070, 6983, 5612	1.7	1228	0.9997	1226	0	0	0	6
MED17	AGATTCTGCGACATGGACAG, AGTGCGGATCAGCATCGAAT, CACTGAGTCCCAAGGCCAAA, CAGCGGATAGACTTCAGCCA, CTAGGAATTTGGACATCAAG, TGAAGAGGTTAACTGTGCCG	6	6993, 8242, 3688, 8720, 7615, 7900	1.71	1229	0.9997	1227	0	0	1	6
ZNRD1	CGAGGTCCATGACAGACATG, GGGGAAGGTTGTGAAGACTT, GTATCCTGAGCCCCGGGCAG, TACTTGCTCCAGCTTTCAGT, TTGCCTGTGCAGACTTTGAG, TTTCTGTTCAGATTGCGGCT	6	5589, 6972, 7703, 8661, 8381, 7107	1.7	1226	0.9997	1228	0	0	0	6
POLR2G	AAGTTGGGGCCGAAGTAGCG, GAAGCAGAAGCTCTTCACCG, GGTGTGATCCAGCCAGGCCG, TCACCGTGTTGAGCAAGTTG, TGTGCAGGTCCCCTCCACCT, TTTCCGGCCATTTAAAGGGG	6	8675, 7838, 6967, 8380, 7765, 1303	1.7	1225	0.9997	1229	0	0	1	6
CDC5L	AATTGCACGTCAAACTGCCG, AGAAGTATCATAAAAACCAA, AGTTGATGCCAACTCAGTGG, GGATGAAATTCTGAAAGCAG, GGGCGTATGGAGGAATACCG, TCCAATCATTGGAAGAACAG	6	4430, 8882, 7013, 7695, 8877, 8838	1.71	1230	0.9998	1230	0	0	1	6
ZNF593	ATGAGATTCACCGCGAGCTG, CTCACGCGCAGGCCAGACAG, GCCGGGCTAGAGAGTGCGCT, GGCAGATGAAGGCGAAGCGG, GTTCGACCCCGACCTGCCAG, TTCGACCCCGACCTGCCAGG	6	7056, 5384, 7015, 7079, 7841, 7228	1.71	1231	0.9999	1231	0	0	0	6
CSNK2A1	ATCTTCTGTCCCCAGAACCT, CAGCTACGACTAATAGACTG, CTAGTTGGTGAGGATAGCCA, GATCATAATTGTCATGTCCA, GATTGATCATGAGCACAGAA, TGAGGATAGCCAAGGTTCTG	6	8156, 8869, 8012, 5891, 7088, 8925	1.73	1235	1	1232	0	0	0	6
NELFA	CCAGCGTCTTCAGCCCCACA, CGGCGACCATGAGCACCCAG, GCAGTTGAAGCGGAGCGCCG, GCTCCGCTTCAACTGCTGGG, GGTGTCTTCATAAGATGCCG, TAACTGAAAATGCTTCACCG	6	7868, 9038, 8178, 7336, 5109, 7735	1.79	1257	1	1233	0	0	0	6
APEX1	AGAGGCCAAGAAGAGTAAGA, AGTGTGGCAGGTTTGCCACT, CCAAGAGCAGATCTTGAGTG, GATCAGAAAACCTCACCCAG, GTAACGGGAATGCCGAAGCG, TCGGACAAGGAAGGGTACAG	6	7105, 6031, 7656, 7165, 8023, 8082	1.73	1236	1	1234	0	0	0	6
CENPN	ACACTGTTACCTCACACAGA, CTGTTGCTGAGTTCATCAAG, CTTACAAATGATGTCTAACA, GCACTTGATCCATCTGTGTG, TCATCAGCACCAGAAAGTTT, TGAACTGACAACAATCCTGA	6	8098, 7700, 8296, 7972, 3928, 7264	1.77	1249	1	1235	0	0	1	6
YY1	CGACACCCTCTACATCGCCA, CGAGGTGGAGACCATCCCGG, GAAGAGTTACCTCAGCGGCG, GCACCAGGATCACCTCCTGG, GGAGGAGGACGACGACGACG, GTCGGGTCGTCGGTGACCAG	6	7301, 7837, 7319, 7600, 8304, 4136	1.78	1254	1	1236	0	0	1	6
RUVBL1	AGTACCTTGCCAGTTCCAGG, ATAGGACTCAAAACAGCCAA, CCAGCCCCAGCCCTTTCACG, GCTGATGGAGAACTTCCGCA, GTATGTCCCCTTGCCAAAAG, TGTGAGACAGAGAATCCCAT	6	8617, 8255, 7273, 9039, 6248, 7829	1.78	1251	1	1237	0	0	0	6
FBXO11	AGAGCCTTCCATAAAAACGA, ATATCTTCTCCACAGCACCT, ATATTCCTCCAGTCTGCCCA, GTTCGATGTGAAATTCACCA, TTACTGTAATCTCTAAGCAG, TTTCACATCGAACCACTGTA	6	7227, 7740, 7853, 7469, 4923, 7625	1.76	1246	1	1238	0	0	1	6
GTF3C6	ACAGCTGTCCACTTGCAGAA, GGACAGCTGTGTCTTTGCTG, GGACGGAGAAGACGAGGAAG, GTCTTTGCTGGGGAGTATGA, TCCAGAGGACGGAGAAGACG, TGTAGGGCATTGACACTGAG	6	3384, 8819, 8272, 8311, 7130, 8403	1.74	1239	1	1239	0	0	1	6
SMARCB1	AACTACCTCCGTATGTTCCG, CAGAATCTCTTCCACTTCCG, GAGAACCTCGGAACATACGG, GTTCTACATGATCGGCTCCG, TGAGAACGCATCTCAGCCCG, TGTGACCCTGTTAAAAGCCT	6	6632, 7230, 8750, 9072, 8483, 8028	1.77	1247	1	1240	0	0	0	6
CCNC	ACATGTTGCTTCCCCTTGCA, ATAAGGAAATTCCTTTGGAA, CTGTTCTAATTACCATGCAA, GATGCCAAAAACACACATGT, GCTCCAGTATGTGCAGGACA, TGTTCTAATTACCATGCAAG	6	7389, 6517, 7161, 8541, 7327, 7968	1.75	1242	1	1241	0	0	0	6
SUV39H1	ACACACTTGAGATTCTGCCG, CTACAGTGATGCGTCCCAGA, GCTTGGGTCCAGGTGCCGGG, GGTTCCTCTTAGAGATACCG, GTACTCATTGATGTACACGA, TTAGCCGTGGGGAAAGATGG	6	6603, 7210, 8291, 7807, 7355, 7677	1.76	1244	1	1242	0	0	0	6
MIS18BP1	ACAGGAGTAAGTGTGCCTGA, ACAGTAATGTAATTATAGAG, ATAGTGAGAGGACAACAGAA, ATGATTCTAGAGGAACTCCT, GACTTCATATAACAATACCT, TCAAAGGAGAAATCTACCCA	6	8781, 7468, 8061, 4310, 7217, 7607	1.76	1245	1	1243	0	0	1	6
DDX5	ATCTACGGTGGTGCTCCTAA, GATTTGGAGGAAGTAGGGCA, GGAAACATACAGAAGAAGCA, TATTCGAGTGACCGAGACCG, TCCCTGAGCTTGAATAGCAG, TTTGGTGCACCTCGATTTGG	6	8339, 7196, 7412, 8498, 7458, 7033	1.76	1243	1	1244	0	0	0	6
ECD	ACATTGAGAGAATAATCACT, CTGTGAATAGGCGCATCAGA, GAGTGGTGAGGCAGTCACAA, GCACACTGCTTCCTTCCAGC, GGATAATACACAATTCCCCA, TCAATCTTAAATATAAACCT	6	7057, 7179, 6688, 7928, 8506, 8219	1.72	1233	1	1245	0	0	0	6
EED	ACTGAACTCCAAACAATGGT, GATCCAGCTACAGCCAGCAG, GCACCTGGAAGGAAAAGTTG, GCAGGCATGTCTGTTCCCGC, GCTCATTGATAGCATTTCCA, TTAAACTGAACTCCAAACAA	6	8806, 5915, 8551, 7527, 7293, 9048	1.78	1253	1	1246	0	0	0	6
DDX54	CCACGGGCTGCTTACCCACG, CGGCGAGTTTGAGATCCAGG, CTTCGTGGCCACAAACACCA, GAATTATTGCCACGCCCGGA, GATCATCGCCCGCCTCCCCG, GCAGACCCTGAAGTTCACTA	6	7899, 531, 7876, 8136, 7948, 7291	1.78	1252	1	1247	0	1	1	6
RNF8	GATTCTGCTTCAAAACACAG, GGTCAGCCAGTGAAATCACA, GGTTTCGAGAAATCATCAGG, GTCAGCCAGTGAAATCACAG, TGAGCCAAGTAAGACCACAG, TTAGGATCCAAATTGTCAGA	6	9062, 7159, 9052, 8352, 8254, 4058	1.75	1241	1	1248	0	0	1	6
SMC4	ATATGAGTTATCATAAGCCG, CATTGATGAAAAATACGACG, GCCTTAAACAGGAAACACAA, TGACGGCGCCAGCAGCGACG, TGAGCCGCCGTCCGGCCGCA, TTAATTTCTGTAGTTAAACA	6	7875, 7352, 8327, 8297, 8607, 2768	1.79	1259	1	1251	0	0	1	6
MED8	GAGGAGCGAGAATCAGAGAG, GATGGTCAGGGACTACCTCA, GCTTGGTTCTCAGATGGTCA, GGTCAGGCTTGGTTCTCAGA, TACAGCGGCAGACTGAAGGA, TCTGGAGAAAATCAGCAAAG	6	6294, 7134, 8399, 7371, 8558, 7109	1.74	1238	1	1252	0	0	0	6
RAD21	ACATACTCTAAGTCAGGCAG, GAGTAGTTCGAATCTATCAC, GGTTAGCTTCTTATCCCAAT, GTGTAATTTAGAGAGCAGCG, TCATCCATATCGTCATGTGC, TCTGTTCAGACTCTAATAGG	6	7495, 8599, 7362, 8769, 6539, 7370	1.8	1260	1	1253	0	0	0	6
RNMT	ACACTGTTTGACAGAAACAT, AGAAGGACACAGCTCAACAG, CTGTCAAACAGTGTCAGCAG, GTCCCAGAGGAAAAAGATTG, GTTTGAAGATGATCTTGTAA, TGATCCTGAAATTGTCCCAG	6	7857, 7318, 8812, 7617, 2990, 7577	1.79	1255	1	1254	0	0	1	6
ELP3	ATGTGGCTAGAGACACCAAC, CCCGGTCCCACGAATCACCA, CCTGCCACCATCTTACCTGT, GCCCATCGGGACGAAAAGCA, GGTGTCTTGTCTGTAGGAAA, TACTTCCAACAATATTTACG	6	7847, 8878, 7108, 8967, 8325, 6836	1.74	1237	1	1255	0	0	0	6
GTF2H4	AAAGTACCAGAGCTGAGCCG, AAGCCAGCGGAAGTAATGCA, ACAATCGGTCCAATACCCCA, AGACAGCCAGACATGTGGCA, CCTCTTTCTCCCTAGAGCCG, CTCCCTTGACAAGTACGCCG	6	7801, 8333, 8008, 8931, 7320, 7167	1.79	1256	1	1256	0	0	0	6
PHF5A	ATCTTTCATCTTGCAGCCAT, ATTCTCTTCCTTACAGGTGA, CATATGCGCACCAGAGTGCA, CTATGTGCGTCCCTGCACTC, GTAACTATGGATCTTACCAG, TGTAACTATGGATCTTACCA	6	6341, 8529, 8111, 7372, 8434, 8578	1.8	1261	1	1257	0	0	0	6
IPO9	ACAAGTGGTAAAAATCTCCA, CAAAGTCCTGATCTTTCCCG, GAACTGACTGTAGATCCCCA, GATGTATAAGATCTTCACCA, GCCAGTCTGGACTTACCTGA, TCACAGGTGGAAGATCCATG	6	5391, 7729, 7132, 8180, 8629, 7530	1.74	1240	1	1258	0	0	0	6
HDAC8	AGCGACTGCCCACTGTCCGC, CCCTGGCCAAGATCCCCAAA, CCGTTTGGGGATCTTGGCCA, CCTGGCCAAGATCCCCAAAC, GGAGGAGCCGGAGGAACCGG, TCGGGACTATAGATATAAAC	6	4612, 8342, 7257, 8234, 7313, 7723	1.77	1248	1	1259	0	0	1	6
CDAN1	AATGCACGAGGAGTAAACAA, GCGCGCGATCCACCGCACGA, GTTCCTGTTGAACTTCCTGA, TCACTCACCAGCAATGCACG, TCTGCCCTAGGATAACGCTG, TTCAGCTCCTCACTGCCCGG	6	8824, 8840, 9001, 7377, 3133, 7410	1.8	1262	1	1260	0	0	1	6
PMF1	ACCCGGCACTACCATTTCGA, AGTAGCGCCAATCTAGGCAG, CTCGAAATGGTAGTGCCGGG, GCGTCCACTTTACCTGCCGG, GCTGCGTCCACTTTACCTGC, TCTTCGGAATCTGTGCCACC	6	8621, 7266, 7470, 8367, 8635, 2132	1.77	1250	1	1261	0	0	1	6
ARID1A	ATGTTGTTGGTGGAAGACGG, GCCCTCGCTTTCCTGCCCGG, GCTGGAGGCATAAACCCCAT, GGGCTACCAGGGCTACCCCG, GTGTGTATCTGTCCTCCGGA, TCCTGCAGCTCCTTTCCCAG	6	8851, 8779, 8413, 7339, 8044, 6936	1.79	1258	1	1262	0	0	0	6
LSM11	ACTCCATCGCTGTATCCGTG, AGCGATGGAGTTCACCCAGA, CCCCTGCTTCAACAACGTGG, GTTCACATCCGCACTTTCAA, TCAGAGCTGACATCCAGCCG, TCTCTTGTTTCAGTGCACGA	6	8420, 8680, 8927, 7594, 8665, 8982	2.06	1338	1	1263	0	0	0	6
SF1	CCTGTTATCGTCTTCCCGAA, CTTGTTCTCGAGTAAGTCCA, GAGCCCATCTACAATAGCGA, GCAAAAAGCTGGAAGAGGAG, GCTATTGTAGATGGGCTCAG, TGTTCTCGAGTAAGTCCAGG	6	6998, 8468, 7983, 8803, 8681, 8060	1.95	1304	1	1264	0	0	0	6
NCAPG	CAAGGATGATGAATGCCCAG, GCTGAGCCGCACCTACCGCA, GGCCGGGAGCGCTTACCGTG, GTTGTTAATGAAGAACACAG, TGTCGATTAAGGAGGCCTTT, TTAACACCAACAGTAACAAT	6	8356, 8228, 9080, 8884, 8429, 7673	2.01	1325	1	1265	0	0	0	6
TDP2	CTAGGTCTTGGGCTCAGAGA, CTTGCTGAGTATCTTCAGAT, GCGAGCCTGAGGTGAAAAAG, GCTCAGAGATGGTTTCAGGT, TCTGTCAGAGAGGGCTCGAG, TCTGTGTGTGGAGTTTGCCT	6	8104, 8135, 1598, 7815, 8830, 7386	1.8	1263	1	1266	0	0	1	6
NCAPG2	AGTGCATTCCAAAGTGCGGG, CGACAATTCGGAGAAAGTGA, CTACCTGCCACCCATCCACT, TGGCAGGTAGTGGAAGCCCA, TGTGTTGTTAGAAAGCCCAG, TTTAGAAGATCCTTACCCGA	6	8685, 9014, 6100, 7873, 8715, 8471	1.92	1298	1	1267	0	0	0	6
KDM8	CTGCTCCCTGAAATGCTGGA, GCCCATGTCACAGACCCGCA, GCCCTCGTAGAAGAGCTCAG, GCTCTTCTACGAGGGCAGGA, TCACATCTGGAATCAAACCA, TCCTCTCCACTTTCTCCCCG	6	6969, 8741, 8733, 9075, 7884, 7912	1.92	1300	1	1268	0	0	0	6
NELFB	GCAGCTCATCGAATACCGAC, GCGGTTCGTGGACAGCAAGA, GCTGTATCGAGCCTGCGCCG, GGAGACCCTGACCAACTGCA, GTGCAGGTCCAAGAAGGGGA, TGGACCTGCACGGGACGCCG	6	8800, 8165, 8175, 8817, 9085, 9074	2	1322	1	1269	0	0	0	6
NELFCD	ACAGGTACGTGTGCTCCCCG, AGATGATTGCACATACCACG, ATAAAAAAGGTCCCGCCACG, CCTAGCTTATTTCTGACGCA, GCAGAAGATGGTGTGCCACG, TCGCATTTACCAACAGCAGG	6	8981, 9007, 8854, 8464, 8585, 3159	2.07	1340	1	1270	0	0	1	6
NCAPD2	CAGCTTCTACAGCTTCCCCA, CTTCTCCCGGAAGATTACAG, GCTTTGACTGGGAAGAAGAG, GGAATCTCCTCCTCTCCCTG, GGAGTTGTTGAAAAGTGGAG, GGCTCCTTAGACCAGATGAG	6	7592, 8807, 8642, 8329, 8804, 8038	1.96	1312	1	1271	0	0	0	6
NCAPD3	CATCAACTGTAGAAACCAGG, CTAAGATCCAGCGGACACCA, GCTTCCGGACAGACACTGCA, TAGCAAAAAGTAAAGCCCAG, TCTGTAATAGAGAGTCACCC, TTAATGTTAGAAGTTGGTGA	6	7990, 9027, 8816, 8941, 8052, 5826	1.95	1305	1	1272	0	0	0	6
CENPP	AGATGCCGTGTACCTCTCGG, ATCCCCATGGAGCAGGAGGA, GATGCCGTGTACCTCTCGGA, GCTGGCGCTGCGGATCCCCA, GGATACAAATAGATGAAGAT, GGGCCCCTCCGAGAGGTACA	6	8260, 4941, 8811, 9033, 8798, 8772	2.02	1328	1	1273	0	0	1	6
SRSF2	CCACTCAGAGCTATGAGCTA, CGCTACACCAAGGAGTCCCG, CTTGTCGTGAAAGCGAACGA, GCACCTCGCCCGACACGCTG, GGACTCACACCACAGCCGCC, TCATACCCTCCACATCGGGA	6	8227, 7931, 9018, 8785, 7970, 8569	1.95	1303	1	1274	0	0	0	6
SRSF6	AGGCGTCCTATGTAGACGCG, CCTTCATGTGATAAAGGTGG, CGTGCTTTGGACAAACTGGA, GGCCCGCGTCGCGATCGCGA, GTGATCGTAGAGCACGCCCG, TGAGGTCTACTTCGAGGAGG	6	8721, 8034, 8514, 7638, 8348, 6858	1.86	1288	1	1275	0	0	0	6
SRSF7	AGGATCTTCGAATTCCACAA, CTATCAAAACGTGATCTCCG, GATGCAGAAGATGCAGTACG, GATGCAGTACGAGGACTGGA, GTGAGGGTTGAACTATCGAC, TCATCATGTCGCGTTACGGG	6	8324, 8077, 8938, 8682, 8557, 2985	1.97	1316	1	1276	0	0	1	6
KMT2D	CTATGCAACCCAAGGAACCA, GCCCACCTAGGAGAACCTGG, GCTCTACCTGAGATGCCCGA, GCTTCAGCAGACAGAGGCCG, TGACACCATGCAGAATACCG, TGTGTTGGAGAAGAGAACCA	6	8763, 7537, 6038, 8127, 7772, 8693	1.84	1274	1	1277	0	0	0	6
PELP1	ACAGCAGCATCTCCACCCCA, CATCAAGGAGGAGACTCACA, GCAGGCAGTAGAGTTCACGG, GCAGGTCCAAGGCCTCAAGG, TGAGAGAACCACAAGCCCGA, TGAGGACCTGGGGAAGCAGG	6	8120, 7307, 8859, 9037, 8546, 9045	1.98	1317	1	1278	0	0	0	6
MSL1	AAGAAACCCCAGAAAAGCCC, CCACTCCGCCCACATGAGAA, CCTATTAAAGAGGAACCCTG, GGATTGAACGTATGGAAAGG, GGGGTGTCCACTGAAGACCG, GTTTCAGATAAGGAACCACA	6	8065, 8100, 8365, 8479, 8024, 4846	1.96	1308	1	1279	0	0	1	6
UHRF1	CCATACCCTCTTCGACTACG, CGTGGTCCAGATGAACTCCA, CTACAACCCCGACAACCCCA, GATCCAGGAGCTGTTCCACG, GCTGAGAGAGAGCAAGAAGA, TCTGCAGGCCTGGCTCCACG	6	7752, 8683, 8957, 8706, 8042, 8926	1.96	1313	1	1280	0	0	0	6
UBE2L3	AAACATCGACGAAAAGGGGC, ACCCAAACATCGACGAAAAG, AGGCTCCCTTATCATATGGA, CAGCACCAAATCCAAGATGG, GACAACCCTCCATATGATAA, TGATCTTCGGTGGTTTGAAT	6	7478, 8491, 8936, 8268, 7408, 6466	1.81	1265	1	1281	0	0	0	6
RCC1	CAGCTGTCAGCATCACCAAG, CTTGCAGCTCCACTTTCCCA, GGAAGGGACACATCAGTGGA, TGTGATGGAGAGGAAGAAGC, TTACCCGGAAGGAGCCCCAG, TTGGTGCTGACACTAGGCCA	6	7401, 8470, 7926, 7556, 8915, 6580	1.81	1264	1	1282	0	0	0	6
ATXN7L3	AGAAGTGCCTGGGAATGGGT, CATCGCTCAGGAGATATACG, CCTGGATAACAGCAAACTAG, GCAGCCGAATCGCCAACCGC, TCTCCAGATGGGGAGCAAAG, TGGATCTTCGAGGGGAATTG	6	8350, 8650, 8517, 7957, 9054, 5720	1.94	1302	1	1283	0	0	0	6
SMARCC1	CACCAATTCCAGAAAAACCA, GCTCTTCCTGAGTTCTTCAA, GTGATTCTGTTGGTGTCGGA, GTTGGTGACATGCTTCCCAA, TATTCTTCCTCACAAGACGA, TTAAAATGAGGAGTAGGAGG	6	7917, 7432, 7939, 8908, 8020, 7630	1.86	1285	1	1284	0	0	0	6
NSMCE2	ACTGGTTTCATCTCCTTCAG, AGTGAGTAGTGAATATAGTA, ATATAGTATGGACAAGGCAA, GCAACTAAACCATTATGTAA, GGTACTAATTTCAAGATGCC, TTGAATTTGCTACATTGGAT	6	7471, 8148, 9042, 8400, 5239, 8423	1.82	1270	1	1285	0	0	0	6
SUPT4H1	AGACGGTGCCGAAGGACCTG, ATAGACCAGTTTGAATATGA, GACCAGCGAACACAGCAAAC, GATGCATATCTACAAATGAA, GCACTAGCTCTTCCTTTGAT, TGAAGCGGCTTACCCATCAA	6	7730, 8049, 7919, 8645, 991, 8435	1.89	1295	1	1286	0	1	1	6
NDUFAF5	ACCTCTGGTGTCTCTCCCCG, ACCTGGGTATGTCATATACA, ATCCCGGTCGAAAATATTCA, ATTTGACTACCTGAAGGAGG, GCACCGATAAACACTCCATC, TTGGGCGGCGAGGGTCCCAG	6	7663, 8709, 3538, 8829, 8237, 8109	1.87	1290	1	1287	0	0	1	6
BRCA2	AGCACAGTAGAACTAAGGGT, GATACAGTATTAATTGACTG, GCAGGTTCAGAATTATAGGG, TCTGGCCAGTTTATGAAGGA, TGTGTCTCCATATAAAACCA, TTTACAGGAGATTGGTACAG	6	8737, 7501, 8303, 7891, 8066, 8383	1.93	1301	1	1288	0	0	0	6
CCDC101	ACATCCAGAAGACCCATGAG, AGTCTCTGTTGGAAGAGAGG, CCAGGCTTCCCGATCCACAG, GAAAGCTCTGGACAAGATCG, GCGGGAATCGGCAGACACGA, TCTTGTCCAGAGCTTTCCGA	6	8390, 8474, 8760, 8428, 7767, 9003	2.05	1337	1	1289	0	0	0	6
PCNA	ACTAAGGGCCGAAGATAACG, ACTCAAGGACCTCATCAACG, CTTTGGTGCAGCTCACCCTG, GTCGAAGCCCTCAGACCGCA, TCCAAAATACTAAAATGCGC, TGGCCAGGTTGCGGTCGCAG	6	8107, 8499, 8917, 8360, 1474, 8002	1.95	1306	1	1290	0	0	1	6
TCEB2	AGCGGCCTCCTGACGAGCAG, CTTCAGTTCGAACACCGTGC, CTTGGATGATGGCAAGACAC, CTTGGCGTCCGTGAAGATGG, GGACGCCAAGGAGTCCAGCA, TACAGCCGCTGCTCGTCAGG	6	8361, 8701, 7568, 8866, 9024, 8959	2.04	1336	1	1291	0	0	0	6
NPM1	ATGTCCATCGAATCTTCCAT, GAAAATGTCTGTACAGCCAA, GCACCAGTTATCTTTAAGAA, GCAGAGGCAATGAATTACGA, GTACCGTTCTTAAAGATAAC, TGTTATTTCAAAGCCCCCAA	6	6201, 7593, 8534, 8633, 8370, 8513	1.85	1281	1	1292	0	0	0	6
HNRNPA2B1	ACTCTCCCATCAATTGAATG, AGGCAGTCTGGAAAGAAAAG, CCATTGAGATAATTACTGAT, CCTGCAAGCAAAAGATCAAG, GGCAGCATCAACCTCAGCCA, TTAGGAATCTGGAAAACCAG	6	7941, 8230, 7717, 8831, 7589, 8493	1.88	1293	1	1293	0	0	0	6
TTF2	ACTACACCAGAAGCAGGCAT, ATAAGCAAGCCCCAGAAAGG, GCTGGTGTGGAAGTATTCCA, GCTTCTGGTGTAGTAGCAAA, GTTGTGGCAGAAGATCCCGC, TCTTCTCAGGAGAAATCAAG	6	8536, 7574, 8759, 7921, 8892, 3294	1.85	1277	1	1294	0	0	1	6
PSMD14	AAAGCCAACAACCAAAGCCA, AGCCTTGTCGGAGAGAGCTG, ATATGTTGAAGCAGACAGGA, CTTCCATTGGAACTCCAGCA, GTACTCACTGTTCCTGACTG, TCCCTGGCACTGTTAAAAGT	6	8930, 3476, 7718, 7943, 7913, 7907	1.88	1294	1	1295	0	0	1	6
PDS5A	AGGGTAAGCGATCTTCCCGT, GAAGATCGCTTACCCTCCGG, GATCACCGACAAGATCACCA, GCGTTTGATCATCTCGTCCG, GGAAGATCGCTTACCCTCCG, GTGGCGTCGTGAGTGCCGAC	6	8128, 8876, 8422, 9029, 8969, 7520	1.98	1318	1	1296	0	0	0	6
TAF5L	AAACAGTCCGAAGAGCACAG, ACAAAGAGAGGATAGAGGAG, CATTCTGCAGAAACATTCCA, GCAGAAACATTCCATGGAAG, GCGTACCGAGCAGATTCAGA, TGTCCTGCTACCTCAAACGC	6	8570, 8708, 7636, 8809, 3290, 8321	1.86	1287	1	1297	0	0	1	6
UBE2N	CCATTGGGTATTCTTCTGGA, CCTCAAAGGGGGAATCCTGA, CCTTCCAGAAGAATACCCAA, GGTTACCTTGATGATCCTGC, GTTACCTTGATGATCCTGCG, TGGTTCTGCCAGCAAACGCT	6	8906, 7778, 8730, 8726, 8932, 8893	2.13	1351	1	1298	0	0	0	6
RBM14	ATATTCGTGGGCAACGTCGA, CAGCTCATGACCGTGCCGTA, CCTCTTTGCGCCCTACGGCA, CGTGCCGTAGGGCGCAAAGA, GCAGCCCTCTTTGCGCCCTA, GTTCTCGCGCATGTGCACGA	6	8713, 8735, 9015, 8622, 8690, 8792	2.12	1350	1	1299	0	0	0	6
NCBP1	AGTCTTCCTTTCCTTCCAGT, CGGCACAGCGACGAGAACGA, CTTGAACTACCACATAGTTG, TACAACTCCTTTCCAACCCA, TCCAGGGTCCTGTCATGCCA, TTCAGTGTACCCAATGCCAA	6	7462, 8371, 8977, 8103, 5956, 7586	1.82	1269	1	1300	0	0	0	6
NCBP2	ACGCCATGCGGTACATAAAT, CAGATGCGGAAAACGCCATG, CGTCCCATTTATGTACCGCA, CTTCTCTGCACTATGTCGGG, GCTGCGCAGCGACTCCTACG, GTACTGGCTCAGCTCCACGT	6	2194, 8952, 8064, 8393, 9061, 8974	1.97	1315	1	1301	0	0	1	6
SFPQ	AAAGGCGGCAAAATGCCTGG, AGTCACCTCGGCCCCTCCCG, GATCGGTTCCGGAGTCGTGG, GGAAGTCGTGGAGGCCGCCG, GGCTTGGAAGAGTCCTGCGG, TCTACCTGCTGATATCACGG	6	8259, 7665, 8458, 7559, 8398, 8197	1.87	1291	1	1302	0	0	0	6
PABPN1	ACTGGTCGAGGGTGACCCGG, AGTCTGAGCGGCGATGGCGG, GACTGGTCGAGGGTGACCCG, GCAGCAGCGGGGGCTGCGGG, GGGAGCCCCCGGCAGCCAAG, GTAGTCCCCTGCGCCCCCCG	6	8963, 8850, 8188, 9071, 7877, 7612	1.92	1299	1	1303	0	0	0	6
TAF1C	ACAGGCAGACGGCTCCCGAG, AGAGGAGTCCCGGAACACGA, CCAGTTCTCTCTCTACCTAG, CCATGGTTCCACTTCAGCAT, GCTCCAGCAGAGGAAATGCA, TGGAGCCTAAGATCCAGTGG	6	8883, 8451, 8663, 8740, 9083, 9086	2.11	1349	1	1304	0	0	0	6
ERCC4	ACAAGACTCGATTATTCTGT, GCAGCTGGAGAAAGTGGTAG, TCTGGAATCTCTGAGAGCAA, TGTCGCTCGTACTCCAGCAG, TTTCATTTGTTACACGGCGA, TTTCGCCAGAAAAACAAACG	6	8235, 8940, 8591, 8322, 5766, 8432	2.01	1326	1	1305	0	0	0	6
ERCC2	AACTTCTATGAGAAGCAGGA, ACGTCCTTCCCAAAGCGCAG, ACTGTCTTCCCGGTGCCTGA, GATCCTGCATGCCAATGTGG, GCTTTGGGAAGGACGTCGAT, GTACTGCGCCCGCACATAGG	6	6916, 8039, 7667, 8844, 7423, 8497	1.81	1268	1	1306	0	0	0	6
TAF8	ATAACTATCATCTGGCCCGG, CATCTCTGTCAGCGTTTCCA, GAGTGCCGAGAAAGCATCCG, GCTCCTTGCTGACAGAGGCA, GGAACTCAGGAAAATGGCTG, TGTGAGCTCCTTGCTGACAG	6	8501, 8782, 8668, 8200, 8533, 9059	2.08	1342	1	1307	0	0	0	6
RAN	AGTCAAATGACGTTTCACGA, ATGAACCTCAACACCCAAGG, CTAGTGTTCCACACCAACAG, CTGTTGGTGTGGAACACTAG, GCCGGCCAGGAGAAATTCGG, TCTGTTGGTGTGGAACACTA	6	7698, 9022, 8942, 8890, 8005, 8366	1.95	1307	1	1308	0	0	0	6
TRRAP	AATCGTAGCAAACAGAGCAG, CAGCATTCCATCATTCCGAG, CCTCTACGACCACATCCAGC, GCAATGGTGTTCATGATCAA, GCATAAGGTGTTCTACACAG, GTTCTTGGCGAAGAGCTGGA	6	8810, 8062, 6601, 8315, 7848, 8353	1.92	1297	1	1309	0	0	0	6
ENO1	AGGTCCTACCTTGCTAACCA, AGTCGGTGCAGCAAACTTCA, ATACCAGTTGAAGCACCACT, ATCATTGTCCCGGAGCTCTA, GAAAGATGCCACCAATGTGG, GCGAGAGTCAAAGATCTCCC	6	8644, 8487, 8658, 7758, 8973, 8757	2.07	1341	1	1310	0	0	0	6
MYC	CTATGACCTCGACTACGACT, CTTCGGGGAGACAACGACGG, GCTCGGTCACCATCTCCAGC, GGTAGGGGAAGACCACCGAG, GGTGTGACCGCAACGTAGGA, GTATTTCTACTGCGACGAGG	6	8985, 8775, 8874, 9019, 9051, 9043	2.17	1352	1	1311	0	0	0	6
HCFC1	CCATCCCACCAAACACCAGG, GATGAGCTCCTTGATGGCCA, GCTCCTTGATGGCCACGGCG, GCTTTACCTGGAGTTCGTAG, GGACATTCCCATCACTTACG, TGAGTCTCTTCCACTCCCAC	6	7558, 8418, 8460, 8445, 8035, 8839	1.96	1311	1	1312	0	0	0	6
WDR82	CGCGGAACACCTTAGCGACG, CGTGCTCTATGACTGCCAGG, GCTGTCGGTCAGCTTCATGG, GTACAGTAAGAAATATGGTG, TAGGGCCTCATGCATCTGCA, TTTCAGCCCCAACGGCGAGA	6	6112, 8783, 9023, 8347, 8168, 8894	1.99	1320	1	1313	0	0	0	6
MCMBP	AATCCCTGCACGATTCCCAG, CATCGGATCCAGCAGTGCAG, CTAGGAGTGTAGGATGTTGA, GCTGTGTCTGTGCACTCCAT, TTACCTTCACAAGGCATGCA, TTAGGTTTCAAATAATGAAG	6	9055, 7623, 5242, 8083, 8637, 7887	1.86	1284	1	1314	0	0	0	6
HNRNPK	CAGACAGCAGTGGCCCCGAG, GCATTCCTGGAAAAGCTTGA, GTATCTTCTCCAGAATGCTG, GTTTCAGTCCCAGACAGCAG, TCCACAGCATCAGATTCGAG, TTATTGGAGGAAAACCCGAT	6	8183, 8169, 8872, 7937, 7634, 6794	1.86	1286	1	1315	0	0	0	6
MMS19	AAGGCCACCAGAAGATTACG, CACAGGGTAGAGAGCAGCCA, GCTGCAGCTTCAAGAAACCC, GTACAGACTGAGCTTCCTGA, TCCCTGACAGGTGTTCCAGA, TCTTCTCTCTGGATACCATG	6	8870, 8626, 8776, 8158, 8444, 8573	2.06	1339	1	1316	0	0	0	6
CDK13	ACACTTCTACACCTACCAAG, CCTCCTCCTCCGGCACCCAG, CGGACAAGTTTACAAAGCCA, CTGCCCCCTGAGCTACCAGG, GCAGCAGCCCCTATTCTCGG, GCCCCCCTCTGGAGGTCAAG	6	8316, 8284, 8031, 8212, 7707, 8246	1.96	1310	1	1317	0	0	0	6
AIFM1	ACCATGGAAAAAGTCAGACG, AGCACGCTCTAACATCTGGG, ATATAAAGTTGGGAAGGAGG, GGTAGAAACTGACCACATAG, TTACTTATCAAGCTGAAAGA, TTATCAAGCTGAAAGACGGC	6	8182, 8335, 7281, 8729, 8863, 8442	2	1323	1	1318	0	0	0	6
TERF1	AGAAACAGAGAGAAACGACG, CGAGCCATTTAACATGGCGG, CTACCATCCGCACAGCCCCG, GAGGAAATCGAGCATCCAGC, GGAAAGCTCGGCAAAGAGAG, TCAGCGGCCCCGAGCCCGCG	6	7578, 8447, 3758, 8905, 8988, 7788	1.85	1278	1	1319	0	0	1	6
RNF168	AAGAAATTCTCTCGTCAACG, ACTGGCACTCGGACAGCGAG, ATATGAAGAGGAAATAAGCA, GAGTCCACGACGATACCCGG, GATCTGCATGGAAATCCTCG, GGAGGGTGACGGGCTCCACG	6	7538, 8593, 8745, 9032, 8646, 8999	2.1	1344	1	1320	0	0	0	6
MTF2	AGTGCTGCAAATGTAAGCAG, GCAGTAACACTGCTGGACAT, TCAAACGTCTACCATTACAG, TCAGACCACCTACCTCTCCA, TCTTCTTATGAATAACACTT, TTCCCTCTAATGTAGAGGGG	6	8696, 7541, 8896, 8902, 8425, 3804	1.84	1275	1	1321	0	0	1	6
BRF1	ACTCCTTCCCCAGATTCACG, ATGACGGGCCGCGTGTGCCG, GCTCTCCACGAACTGCACCT, GTGCAGTTCGTGGAGAGCAG, GTGGGAAATACCATTCTGCA, TGTCCGTGCCGCCGCAACCG	6	7416, 8620, 7764, 506, 8655, 9076	1.81	1266	1	1322	0	1	1	6
ELP2	AATTTCATGCCAAGTCACCT, CAGGGGGTCATAGAGCACCA, CTGTATGCAATTGACTCGGG, GACCTAGTCTGGGATCCAGA, GTTCGACTCTGGTCTAAAAA, TGAGGATTGGATTAGAGGAG	6	7989, 9057, 8502, 7521, 4661, 7683	1.84	1272	1	1323	0	0	1	6
HJURP	CGTGGCCATTTGCACCACCG, GCATGCGCCTCTGGAAGCGG, GCTTCCAGAGGCGCATGCAG, GGTGAGGCCAGTGAAGGCAG, TCAGGATTGAGAATTTGGGG, TGCAAAACTGGAACTCCAGG	6	9044, 8765, 9087, 7580, 8828, 3332	1.85	1279	1	1324	0	0	1	6
MEN1	AAGTAGGTGAGGCCGCCAGG, ACGTCGTCGATGGAGCGCAG, CATGATCCTCAGACAGGGCG, CGGCCTCACCTACTTTCCCG, GCTGCGCTCCATCGACGACG, GGTGAAGCGGGCATAGAGGG	6	8328, 8401, 8037, 8619, 8462, 8791	2.03	1334	1	1325	0	0	0	6
USP7	ACCATACCCAAATTATTCCG, GAGTGATGGACACAACACCG, GATTTCGCACAAAACACGGA, GGTCTGTCTGGATAAAAGCG, GTACAGGCGGATGCTCCCCA, TTTAGACGAATCATCCCCCT	6	8912, 8495, 8392, 8531, 8055, 5068	1.97	1314	1	1326	0	0	0	6
VRK1	ACCCGTAAGCTGAAGTACCT, CCCAATACTTAGGAACACCC, GTAGGATTACCCATTGGCCA, TATATGAAGCAAATGCCAAA, TGGAAAGTAGGATTACCCAT, TGGGTGTTCCTAAGTATTGG	6	8627, 8666, 8357, 2002, 8788, 8293	2.02	1331	1	1327	0	0	1	6
SNRPG	AATGGTGGCAGACATGTCCA, CATGTCCAAGGAATATTGCG, GACATGTCCAAGGAATATTG, GGGAGGGTGAGCTTTGCTCA, TCTATCACAAGGTTCATAAA, TTAATAGTGAAATTAAATGG	6	7777, 7533, 7122, 7679, 8186, 7920	1.84	1273	1	1328	0	0	0	6
SNRPF	AAGTGGGGAATGGAGTACAA, AGATGGCTACATGAACATGC, AGGAAAGGTTTGGGATTGAG, CCTGTTAGTCCATTGAGGAA, GCTTTCCTGTTAGTCCATTG, GTGATGGTGAAACTTAAGTG	6	7929, 8294, 8923, 8203, 8117, 8027	1.96	1309	1	1329	0	0	0	6
UBR5	CTGGAGCTCGAGATTCCCGC, GATGCTGGAATAACTGGCTG, GCAGCGGGTGAACCACGAAA, GTAAACCTGATAATAATGAT, GTGATGAACGACGAAAAGAA, GTTCCAATACATTCAAAGGG	6	8312, 7661, 8263, 8115, 6955, 8300	1.87	1289	1	1330	0	0	0	6
COPS5	AAAGCCAGCAGCCATAGCCA, ACAGCAGCAAGAAATCCTGG, CCTCCTCACTCCTTAGTCCA, GATGGGTCTGATGCTAGGAA, GCCTTGAAAATGCAATCGGG, GGAACTGGCCAACAACATGC	6	7124, 7583, 8397, 7866, 8738, 7969	1.85	1280	1	1331	0	0	0	6
WDR5	AATTCAGCCCGAATGGAGAG, ATATCTGGTCACAAGCTGGT, ATTCGGGCTGAATTTCACGG, GAGACAATAAGGTTGGACTG, GCTCACGTCCCATATCTTCA, GGATCCTGAGACAATAAGGT	6	8330, 8384, 8875, 8258, 5379, 8954	2.02	1327	1	1332	0	0	0	6
ESPL1	ACTCTACTGGACTCACCAGA, AGCCTTGGAGGACTTCTGGA, CTTGGTGCAGTGCTCTCGCG, GGAAGGAGCTGCTTACAAAG, GTCTCCTCTCAGCATCAGAT, TGTAAGCAGCTCCTTCCACA	6	7125, 9006, 8734, 9078, 8576, 9021	2.09	1343	1	1333	0	0	0	6
GTF2A2	AACTTGAAGGGCAAGTTGGG, AGAACTTGAAGGGCAAGTTG, CCACCTGTATGAGCTCATCT, CTAGATGAGCTCATACAGGT, GAGCCTAGATGAGCTCATAC, TCTGTATAACTGATATGCCA	6	7992, 9000, 7753, 8236, 7771, 8723	1.9	1296	1	1334	0	0	0	6
HDAC3	AGTGGAAGTTGCCCACGTCG, CATGTGCCGCTTCCACTCCG, CTATTCCCATACCTGTGCCA, CTATTTCTACGACCCCGACG, GGGGTCGTAGAAATAGGCCA, TGTCAATGTAGAGCACCCGA	6	8349, 8920, 8610, 7001, 9034, 8998	2.04	1335	1	1335	0	0	0	6
POLR2L	CTGCAGGCCGAGTACACCGA, GCAAGATCGTCGGCAACAAG, GCGTACAGGGATGATCATGG, GCTGCAGGCCGAGTACACCG, TGCAGGCCGAGTACACCGAG, TTCACTTGTGGCAAGATCGT	6	4713, 7699, 9068, 8744, 8211, 8929	1.88	1292	1	1336	0	0	1	6
POLR3B	ATACTCTGCCCCTATTACAG, CGTGGAGGCTGATAGAAAAG, GCAATGCCTTACCTATCGGC, GCACTTGGGTTACACCCTGG, GTGGATATTGAATATACCCG, TGACAAGCGAGACAGCACTT	6	7156, 7614, 7768, 7626, 8431, 8647	1.86	1283	1	1337	0	0	0	6
POLR3H	CTTCCTCTCAAACTGCCAAG, GCTCAACGACTCCATTGCCG, GCTGCTGCAGTGACTCTGGG, GCTTCCTCTCAAACTGCCAA, GGATGCCTATGTATTCCCTG, TGTGTGATGCGCCATCCCCA	6	7440, 9060, 9030, 8195, 8615, 8149	1.99	1319	1	1338	0	0	0	6
POLR3K	ACGTGTTGCAGGAGAAGCGG, GCCGGGGCAGAACAGCAGCA, GGCACGTGTTGCAGGAGAAG, GGGTGATGTTGTGCACGTAG, GTACCCAAAACTGAAAGAAG, TCAGCCCGTTCCCGCAGCCG	6	7500, 9020, 4175, 9025, 7863, 9065	1.83	1271	1	1339	0	0	1	6
TINF2	CACAACCTGCCAGCTAGCCG, GCCGGTAGCGAACCAAGCCA, GCTAGCTGGCAGGTTGTGCG, GGTTGTGCGCGGACGCTGCG, GTATCCTCAACAGACAAAGC, TGGCCTTTAGGCCCATACAA	6	8916, 8742, 8986, 9084, 7597, 8606	2.1	1345	1	1340	0	0	0	6
KTI12	CCTGGGCGCAGAGGACCCAG, CGTCCACCACGTACACCGCG, GCAGTAGACCAGGCAGAGCG, GCGTGCTGAAGAGTTGCGCG, GCTGGCTGCCGAGGGCCGCG, GTCTACTGCGTACGGCCCGG	6	6687, 8976, 9040, 8767, 8624, 8689	2.11	1348	1	1341	0	0	0	6
BAP1	ACCCCACTCCCATTGTCCAG, GAGCCTCTAGTACTGTCTGA, GCTATGTGCCTATCACAGGC, GTATCGGCCTCGCCACTGCA, GTTTGCTTCCAGCACCAGCG, TCAAATGGATCGAAGAGCGC	6	7599, 7959, 7728, 8396, 6411, 8437	1.86	1282	1	1342	0	0	0	6
C1QBP	ACCTCCAGACATCTTAGGGA, ATTAGTGCGGAAAGTTGCCG, CCACAGGCGCAGGGTCCGCG, CCTGAGTGATGAAATTAAGG, GCGTGCGCGCAGGTTCCGAG, GGACAGAAGCGAAATTAGTG	6	8374, 8971, 7311, 8651, 8269, 8939	2.02	1329	1	1343	0	0	0	6
PRMT1	CAGTGGTGACCATCATCAAG, CATGTTTGCTGCCAAGGCCG, CCTTGGCAGCAAACATGCAG, CGCACACTTTGGCATCCACG, GCAGTGGTGACCATCATCAA, GTAGGTGCGGGTGAAGATGG	6	8842, 8687, 8172, 8288, 8522, 8041	2	1321	1	1344	0	0	0	6
RAD54L	ACAGCTTGAACACCAGCCGG, CTAGGGAGTGAAATTCCTGT, GATGAAATAGACCAAAAGCT, GGAGGACTCCAACATGAAGG, GGGAGGCTCATACAGAACCA, TGTGGGAGTGTGTCACCAGT	6	8113, 8308, 8608, 7346, 8476, 7419	1.81	1267	1	1345	0	0	0	6
ALG13	AATGAGGTCGTCAAAGCTGG, AGTGCGTGTTTGTTACCGTA, CTTATCCTGCAAATTGGTAG, GCAAATTGGTAGAGGAACGG, GCGCCGACACACACGCAATG, GTAAACGACTCAGTACTGAA	6	8898, 9069, 8612, 8983, 9081, 8575	2.1	1346	1	1346	0	0	0	6
RPRD1B	CAAGAACGAAGTGTGTATGG, CATCCACCACCGCAAGCACG, CATGAGAAAAAGCATCCACA, CGACTCAGAGAAGGAGGACA, GCGGAGCTCGCGGTGCCACA, GCGGTGGTGGATGAGCCAAA	6	5936, 8948, 7666, 7545, 9041, 8331	1.84	1276	1	1347	0	0	0	6
CPSF1	GCCAGGCTCTCCCTGCGGAA, GGAGCACGTGTCCTGCCGCA, GGTGGTCCTGCCCTTCCGCA, GTACATGGAGAACTCCAGAC, TACCTCCTCCTTACGCACCG, TGACAGGAGGACAATCCCAA	6	8310, 8632, 8979, 9050, 8571, 6857	2.03	1333	1	1348	0	0	0	6
MRGBP	ACACCACTGTCTCCTCCGCC, AGTTCAGCCAGAACATCGGG, ATGCTGGGCCACAAGCCCGT, GACAGTGGTGTGGAGCCCCG, GCTTGTGGCCCAGCATGGCG, GGAGGCGGCCACCAGCCCGG	6	5874, 8299, 8377, 8727, 8771, 8943	2.03	1332	1	1349	0	0	0	6
H2AFZ	ACAACTACTGACCTGCAAGC, CCTGGAGTACCTCACCGCAG, CGGAAAGGCCAAGACAAAGG, GATGGCTGCGCTGTACACAG, GTTTCCCGCTCGCAGAGAGC, TTAAAATTTAAGTTCCCAGT	6	8338, 8873, 8218, 8580, 8818, 6875	2.01	1324	1	1350	0	0	0	6
H2AFX	CCTTGCCGCCAGTCTTGCCG, CGGCGCGCCAGTGTACCTGG, GCCGGCCTCCAGTTCCCAGT, GCTCCAGGATCTCAGCGGTG, GGTACTCCAGCACTGCCGCC, GTACACCGGCTGCTGCGGAA	6	8664, 8415, 9058, 9088, 8616, 9067	2.1	1347	1	1351	0	0	0	6
FAM60A	AAGATGTACCGAAGTATAGA, ACTGTCAGTGAATCGAGAAC, AGATGGAAGAAGTTGCCAGC, CTTCCAGGTGGTAGATGCAA, GATCTTACCCAAAACAGCTC, TACAGCAGCCCTCTATACTT	6	8584, 8287, 8789, 8688, 8223, 8334	2.02	1330	1	1352	0	0	0	6

## Sheet: EV+ Enrichment D30 vs. D13
Gene	sgRNAs	# sgRNAs	sgRNA ranks	NES	Gene rank	p-value	p-value rank	# sgRNAs 500	# sgRNAs 1000	# sgRNAs 5000	# sgRNAs 10000
E2F7	ACACAGTTCAGGCTTCTGAG, ACAGCCTGCCAAAAACCCTG, GCTCCTCTCCTAGTCTCTGG, GTGCATGTAACAGAAGAGCG, GTTTGTTGACAGACAGCAAG, TAGTCTCTGGAGGTTCCTCA	6	215, 438, 1644, 320, 730, 102	0.05249	1	0.0099	1	4	5	6	6
MED1	ACACAACTCACCACACACCA, CCAACCAACACCTTTCCGGG, GCACTGCTATTTCCTCAACA, GGATAAGAGGAACTCGGCCA, GGGTTGTGATGAGTTCTGGA, TGAGTGATCAGTTCATACAG	6	250, 4207, 1474, 74, 257, 534	0.06104	3	0.0125	3	3	4	6	6
CCAR2	ATACAATTCCTCCAACCCCG, CTTGGCTTCTTAGCACCCCA, GCACGGACAGAAAATCTGAG, GGAGGAGTGAGCAAACCAGG, TACTGCTGCTCTCTTCCCCG, TTACCTTCGAACTATAAGCG	6	2696, 226, 14, 5708, 1357, 1318	0.05518	2	0.0108	2	2	2	5	6
KMT2B	CGATTCGTAGATCTTCAGGT, GCAGATGGAGGAGGTGGCCG, GCCATACCTTAAAATCCACA, GGAGATTCATCGGAATCCCA, TCTGCGCTCCGATCCCAGCG, TCTTCATCCATAAATCGCCG	6	265, 6144, 5223, 4648, 111, 673	0.0647	4	0.014	4	2	3	4	6
KLF1	AGAGGACGATGAGAGGGGCG, GAAGTCTGAGGACCAGCCCG, GCGGTCAGTGTGCTGATGGA, GCTGGTCCTCAGACTTCACG, TATGCGCCCAGAGTCTCGGG, TCAGACTTCACGTGGAGGGG	6	3755, 295, 1991, 2825, 6308, 144	0.07202	5	0.0177	5	2	2	5	6
TET2	AAGTAAATGGAGACACCAAG, GGAATGACATACAGACTGCA, GGTTCTGTCTGGCAAATGGG, TGAGGCCTTTCAGAAAGCAT, TTAAGGGAAGTGAAAATAGA, TTAGTCTGTTGCCCTCAACA	6	1506, 309, 2697, 3199, 2089, 297	0.07544	6	0.019	6	2	2	6	6
SUFU	ACAGGAACAGATGGACCTAG, AGGAAGGTAACTACCCCAAA, GCTCGGGGATGTTAGCAGAA, GCTGGTCAGGGTAAAGGCGG, GTAGATGGCGTGCAGTCCCG, TGGCCCGCAGAGTTAATGCA	6	1149, 4533, 5305, 187, 317, 3227	0.07739	7	0.0198	7	2	2	5	6
GLS	ACACAGGACTGAAGACAGAA, CCACGGGTGGAGTCGCGCGG, CGGCCCCAAGGACGGCCCCG, GACGCGTTTGGCAACAGCGA, GAGCACGCATCCGCAGCCCG, GCGTGAGCGCGACTCTGCGG	6	340, 3654, 5364, 72, 4446, 4867	0.08301	8	0.0232	8	2	2	5	6
NCOA1	ACCTCCTGAAGAGTTAGCAG, AGAGATACTAGGATTGACCG, GAGATACTAGGATTGACCGA, GCCACCATCCAACAGCAACA, GTATTGCACGGCGATTACCT, TTCACCCTCCAGATGAGCCA	6	368, 185, 4380, 3457, 1141, 2003	0.08984	9	0.0271	9	2	2	6	6
VEGFA	AGATGTACTCGATCTCATCA, CCATCCAATCGAGACCCTGG, CTCCTGGAAGATGTCCACCA, GCTCTACCTCCACCATGCCA, GCTGCACCCATGGCAGAAGG, GGAGGGCAGAATCATCACGA	6	404, 3180, 1640, 2425, 2358, 235	0.09863	10	0.0331	10	2	2	6	6
MAML3	AGATAACCATTTCCAGGCCG, ATGCAAGTAGGGTCATCGAG, CTTAATGGAGACCAGCAGAA, GTGGTTCCTCTGCTCCGCCG, TCTTTGCCCTTGCAGAACAG, TTTCTTGGCCCTCTGCTCCA	6	400, 406, 1718, 2926, 1988, 1642	0.09912	11	0.0333	11	2	2	6	6
SUPT7L	AACTCAGCTGGCACTCCTGT, CAATCCTGAGAAGGCCACAG, GAGCAGGTATTCCATGAAGT, GCAGCTCCTCTACCAGGCAG, GTGCTGCCAGAACTTCTGGA, TAGCACAGTCAAAGCCCGCG	6	3408, 3602, 417, 4133, 76, 3402	0.1018	12	0.0353	12	2	2	6	6
PRDM9	CCTCTTACCTTGCTGCCTAG, GAGCCCTGAAAAGTCCCAAG, GCAAATTTACTGAATGCAAG, GGAACAGCGTAAACACCAGA, GTATGGGGATGAATACGGCC, TAGTCTTGAGTGCTGTCCAG	6	6319, 8557, 484, 5787, 103, 6160	0.1182	13	0.0461	13	2	2	2	6
JADE2	ACCCACCTCAGGAATCCATA, GCTCCCAGCCTGATTGGCCA, GCTGGGCATCGAGTACGACG, GGACTCATACCAGCTCAGCC, GTGCCACCAGAATATGGCCA, TCATCACTACCCACCTCGGA	6	2001, 377, 485, 2144, 1061, 3045	0.1184	14	0.0461	14	2	2	6	6
GOT1	AATGTCTTTAAAACCAGCAG, ACAGGCGTGGAGGACAACAA, ACCTCCGTCAGTCTTTGCCG, CCATTCTCCAGCATATCGCA, GCTCACTGCCGACTTCAGGG, TTCACTACTGGCAAAACCCA	6	5107, 487, 4080, 2175, 370, 2830	0.1189	15	0.0467	15	2	2	5	6
RAP2C	AGAGATCTCTACATCAAAAA, AGTGACAAACTGCACAGTAA, CATGAGGGAATACAAGGTAG, CTACCGCAAAGAGATCGAAG, GGTGAAGGTGAGACTCATGA, TTTGCGGTAGAAATCTTCAA	6	1696, 488, 1220, 472, 2331, 2914	0.1191	16	0.0468	16	2	2	6	6
CIITA	AGCCAAGTACCCCCTCCCAG, ATAGGACCAGATGAAGTGAT, GCCGGTCTGGAGATGTTGGG, GGAAGGTGATGAAGAGACCA, GGTCCATCTGGTCATAGAAG, TTTCTCTGCAGCCTTCCCAG	6	5461, 195, 3122, 1899, 497, 1207	0.1213	17	0.0483	17	2	2	5	6
EYA1	AGTAATTCCATGACTCCCAA, CCACAGCCAGGACAGCCGTA, CCATATGAGGAAATGCCGTA, GCAGGCATCAAGACTGAAGG, GCTTGGCTGGTGATGCCAGA, GGTAGTAGTGAATCCCCCAG	6	2244, 1369, 3182, 511, 453, 2863	0.1248	18	0.0509	18	1	2	6	6
LZTS1	AAGGTCAGCCAGAAAGCCCG, AGCTCAACCGGTATTCCGAC, GATTACACGGCACTGTCCAG, GCTGCGCTGCAGCTTCTGGA, GCTGGACATGGAGTTCCGGC, TTACACGGCACTGTCCAGCG	6	1571, 2582, 2805, 961, 128, 513	0.1252	19	0.0512	19	1	3	6	6
PARP14	AGTTCTTCCAGGATAAAGCA, GACCAGATAGTGAAGAGAGA, GCACAATCAGCACAACGCCA, GGAGCGGATATGAGGCCCCG, GTTGTGCTGATTGTGCAGCA, TGTCTAATCCACCATCAAGA	6	2774, 3589, 6102, 200, 518, 3862	0.1265	20	0.0525	20	1	2	5	6
MECOM	ACTATGGCGCCGGATATCCA, AGCCGGAAGGAAACAGACCA, GATGATGTCAGTACACCAAG, GCAGTCTGCTCCTCTAAAGA, GCTGAGTGAGGAGTACTGCA, GCTTATTGTCCCCTACAGAT	6	3352, 532, 2526, 2763, 83, 4692	0.1299	21	0.0547	21	1	2	6	6
AGXT	AGTTCCCCGAAGCCATCAAG, CTCGCATCATGGCAGCCGGG, GCTGCTGTTCTTAACCCACG, GTGCTGCTGTTCTTAACCCA, TATGCGCTCCCCGATGTCCA, TTGCCGGTCCATGTAAAGGG	6	1931, 3789, 303, 5834, 563, 5613	0.1375	22	0.0598	22	1	2	4	6
INSM1	CGCCGCTCTACAGTCCCACG, CGCTTCACCAGGAAGCCGCG, CGTGGGACTGTAGAGCGGCG, GCTGCTCTCGCCCAGCTGCG, GCTGGCGCCGAGGCGGCCCG, GGCCGCGCCAACATGCCCCG	6	207, 5250, 1139, 1627, 2037, 579	0.1414	23	0.063	23	1	2	5	6
DNMT3A	AGGATGTGACACTCACCGGG, CATGCCCTCCAGCGGCCCCG, GGGACTTGGAGATCACCGCA, TGACACGCCAAAGGACCCTG, TGGCGCTCCTCCTTGCCACG, TTACATTTGCAGGTGGAAAG	6	620, 1470, 3063, 2149, 2931, 380	0.1514	24	0.0712	24	1	2	6	6
CITED2	ATGGGCGAGCACATACACTA, CGAGCACATACACTACGGCG, GCTTCCCCGACGGCACCAAT, GGAAATGGCAGACCATATGA, GGAGTTGTTAAACCTGGCCG, GGCAACATGAATGCCACGAG	6	6544, 5142, 3616, 3192, 623, 339	0.1521	25	0.0721	25	1	2	4	6
SP140L	ACTTTCTCAGGGAGAAAGAG, AGAAAGTGATCGAAAAGAAA, CTACTTTGGGAAAACCCAAG, GCTGGTCTCGAGTGAAAAGA, GGTTTGAAGGAAAAAAGAAG, TTTGGAAGCACTGTTCAGCG	6	8792, 2366, 2249, 4851, 109, 632	0.1543	26	0.0749	26	1	2	5	6
HMGN5	AGCCAAAGAGAAGATCTGCC, AGGAGAAAAGAAAGAAGCAG, CTGCAGGTCAAGGTGATATG, GAAGATGCCACAGAAAAGGG, GCTTGTGCCAGTTACACCAG, TGGAGAAGCCAAAATTACAG	6	6686, 637, 3590, 5171, 489, 7332	0.1555	27	0.0757	27	1	2	3	6
DNMT3B	ACTGTCTGCCTCCACCTGCG, CCAGCCACCTCTGATCTCCG, GATCGAGTCTTCCCTCCCGC, GGGGATGAAGATCAGAGCCG, GGTCCTCCAATGAGTCTCCA, TATAACAACGGCAAAGACCG	6	1602, 3160, 5267, 361, 3029, 647	0.158	28	0.0779	29	1	2	5	6
MED13	ATTGGTTTAGAAGGAACCAA, CCTTGGAGTTGGAAACCGAG, CTTCATCAACCACATCACAA, GCAGGTCCACCAGCTCCACG, GCTATTAGACTGTTGAGCAA, GCTGCAGTAGAAGTTCTTGT	6	6062, 6570, 674, 2385, 894, 71	0.1646	31	0.0825	31	1	3	4	6
CBX5	ACATGGGAAAGAAAACCAAG, AGAAGTCAGAAAGTAACAAG, GAAGGTGCTAGACAGGCGCG, GGGTGAAAATAATAAACCCA, GTTACTTTCTGACTTCTCCC, TTACTTTCTGACTTCTCCCT	6	684, 1944, 159, 5983, 2111, 3784	0.167	32	0.0854	32	1	2	5	6
JMY	CATAACCTGCCACAACCGGA, GCAGCCTTCTGGGGGACCCG, GCCCAGGCCGAGCTCCGCCG, GCTGCGTCCGACGGGAGCCG, GGAAATGGTGAAGGAGGACG, GGTCTCGGTGAAGAGCACCT	6	1833, 8249, 696, 5558, 5631, 223	0.1699	33	0.088	33	1	2	3	6
MT3	AGGTGGCTCCTGCACCTGCG, CGCGGACTCCTGCAAGTGCG, GCACTTGCAGGAGTCCGCGC, GCAGGAGTCCGCGCAGGTGC, GCGGACTCCTGCAAGTGCGA, GGGGCTCACCAGAAGGGCAG	6	2706, 699, 7434, 974, 455, 6598	0.1707	34	0.0889	34	1	3	4	6
UBE2E1	ACTCACCTGCAATTAGGTGG, CAGAATTCAGAAGGAGCTGG, CCAGGATCCGTGTATGAGGG, GCAACTCACCTGCAATTAGG, GGGAAGTTAGAGGACGCCCG, GGGCGTCCTCTAACTTCCCG	6	4918, 6724, 500, 4942, 5321, 708	0.1729	35	0.0904	35	1	2	4	6
PCGF5	ACTTACGTTCTCGTAGTCCA, AGCCACGAATGGCTACCCAA, GATCAAGCCAACAACAGTGA, TCACCTTCTTCATCTACTTT, TTACCTGCTATATCTGTAAA, TTTCACCAAGTGTTTCCTTT	6	985, 1956, 478, 2614, 715, 1549	0.1746	36	0.092	36	1	3	6	6
PSMD9	CGATGTCCGACGAGGAAGCG, GACGAGGAAGCGAGGCAGAG, GAGGAAGCGAGGCAGAGCGG, GCTCTGCCTCGCTTCCTCGT, GGAGCTGATGCGGCGCAAGG, GGGGTTCACGATGTCCGACG	6	66, 738, 8876, 4958, 1656, 5325	0.1802	37	0.097	37	1	2	4	6
DAPK3	CGACATCTTCGAGAACAAGA, GCGGGAGGTGAACATCCTGC, GCTCCTCCCCCATCTCATAA, GGAGCTCTTTGACTTCCTGG, GGCCTCACCCACAAACTCCG, GTTCTCGAAGATGTCGTGCA	6	5803, 5341, 2477, 422, 2845, 741	0.1809	38	0.0978	38	1	2	4	6
NCR1	AGATCCAGCCACGTACAGCG, ATGTTCTTACTGCTCAAGGA, GAACTCACCGACGCAGAGCA, GCTCCTATAACAACCATGCC, GCTGTGGTCACAGGGCCCAG, TCCCGTATCCGCGCTGTACG	6	328, 5473, 749, 966, 6117, 1848	0.1829	39	0.1006	39	1	3	4	6
HPD	AGATGGTGTCCGCCTCCGAA, CATCTTCTCTGCAGAAAGCA, GCCAAGGTCTCACCATTCGG, GGCGATCACCTGGTGAAACA, GTAGTTCATCTTCTCCACCA, TCAGCCATGTAATCAAACAA	6	482, 1895, 7004, 6729, 3250, 799	0.1951	42	0.1138	42	1	2	4	6
PPP1R13L	ATCGAGCTGGAGCTGTACCG, CAAAGTGCCCGACGGCCCCG, GCACTCTCTGATCGTCCGAA, GGAGAGACCTTGTAATTGCG, GGGGACCCTCGGCTGCCGAA, TCGGCCGTGCGCCCTCCCCG	6	4926, 205, 801, 5856, 7026, 7691	0.1956	43	0.1141	43	1	2	3	6
RBL2	AGCAGCGAGGAAGGAAACAG, ATAAATGGAAAATTCCCAGG, CCACCCCTCAGATCCAGCAG, GAGCAACCTCGTCAGCAGCG, GTACGTTCTCTGAAATGTGG, TAGAAACTGGAGTCACACAA	6	842, 2414, 269, 903, 4541, 1594	0.2056	46	0.1241	46	1	3	6	6
ASPH	CATGCATGCAGCCAAAGCAA, CGTAAGAATGCCAAGAGCAG, CTTCCGTTATAACTTATCAG, GCACCTCTGATAAGTTATAA, GCTCTTGGCATTCTTACGCT, TCTGACCTCTCCGGGCCCCG	6	2626, 4816, 867, 1887, 3151, 462	0.2117	48	0.1306	48	1	2	6	6
RNF169	CGGCAAAGCGAGTGGCCGCA, GAGTACTCGGGCCTCTTCCG, GATGACACAGACACATCGCT, GCAGCCGCTCTGAGTCGGCG, GCAGGGCCGCTGCTTCTCCG, GGAGCCCCCCGGAGAAGCAG	6	312, 8616, 3637, 1386, 873, 8103	0.2131	50	0.1317	50	1	2	4	6
THRB	AAGTGCCCAGACCTTCCAAA, ACAGCGGTAGTGATACCCGG, ATAGGAAGAGCCATTCAGAG, GAACCGGGAGAAAAGACGGC, TCATATTTACAGGAATAGGA, TGTGTGGTGACAAAGCCACC	6	880, 5455, 5404, 5924, 180, 2817	0.2148	51	0.1335	51	1	2	3	6
ATXN7	AGGTTGGCTTTGGTATTGAG, CAGCAAAGTAGAGTTCCCCA, CGAGCACAAAAACAAAACCA, GCCTCAGAAAACTTACCCAG, TCACCTGGACAGATTCTGAA, TCTCTGTCCAAAAGCAAAGG	6	3313, 883, 4699, 4684, 2597, 45	0.2156	52	0.1346	52	1	2	6	6
CENPQ	AAGCACACTAACCTAAAACA, ACTCTTTGACAGAGGTTGCC, ATTCCATCATAGTTTGCAAA, CAGCCAGCAAGAGAAAAACC, GAAAGTCCCTCCCAAAAAGA, TCTCTGGTACTCTTTGACAG	6	888, 1034, 2436, 5707, 2490, 57	0.2168	53	0.1359	53	1	2	5	6
RBL1	ATACGTTCACGAAATTCTTG, CCGCAAAAGCATTATTCCCA, GATGGCAGTAAAGTCGTCCA, GCACCTTCTACCCCACTGAC, GTACTGTGTGAACTGCATGA, TCAGCAGTATGAAAATCAGA	6	4169, 2061, 486, 3040, 898, 5462	0.2192	54	0.1386	54	1	2	5	6
SLC22A7	ACCATCATCGTGATGCCACT, CCTCCAGCCACACATCCTGA, CTGATGGCTGAAGTTGGCAG, GATGATGGTAAAACCAGCCA, GGATGTGGAGCACCGCACCG, GTTCATCCTCCAGCTCCCCA	6	929, 3452, 3470, 4567, 270, 3583	0.2268	57	0.1471	57	1	2	6	6
NKX2-2	AATGACAAGGAGACCCCGGG, ACTTGGAGCTTGAGTCCTGA, AGGTCCGGAGGAAGAGAACG, CGCTGACCAACACAAAGACG, GCGCTGGCTGGCCAGCACCG, GGTCCGGAGGAAGAGAACGA	6	935, 1892, 2000, 175, 3131, 983	0.2283	59	0.1487	59	1	3	6	6
HDAC11	ACAGCATGCTGGTGGAGGCG, ACAGGAGGAACCATAATGGT, GCGAGGCTGGGCCATCAACG, GCGTGTGGAGGGCATCTCCA, TCCTCCTGTCTGGGTCCGAA, TTTCTGTTTGAGCGTGTGGA	6	5730, 5879, 4507, 153, 5119, 940	0.2295	60	0.1504	60	1	2	3	6
MAGED1	CCAGGTATCTCTGAACCTGA, GCTGACATAGAGACCGACCC, GCTTATGCAGACCTTGATGG, GGTGGAGTCTGCCATCCAGG, GGTGGGGTCTGCCATCCAGG, GTTAGCAGCTAACTCACCAG	6	253, 6196, 948, 4267, 6327, 5445	0.2314	62	0.1524	62	1	2	3	6
CBFA2T2	CACCTTCTCCCCAATCTCAG, CTCCCACCAATAAATCCTGG, GTAATGCTGAAGAGGTGGAG, GTACATACTCTCTTGGCAGG, GTGAGAGCAGGACTGTGCCG, GTGCCCCTCATGAATCCCGG	6	5833, 5416, 1051, 243, 1629, 1670	0.2566	72	0.1798	72	1	1	4	6
H1F0	ACTGGCGCGAGGAGCCAGCG, CTTCTGAATGGACTGGCGCG, GGCTAGCCGGAAGGACCCCG, GGTCTGCTTGAGGACACCGG, GGTGTCCTCAAGCAGACCAA, GTGTCCTCAAGCAGACCAAA	6	260, 6217, 1095, 2595, 3868, 2787	0.2673	76	0.1906	76	1	1	5	6
TCEAL5	AAGAAAAGCCGGACATGGAG, AGAAAGTGAGGGAAAGCCAG, AGAATGCGAGGGAAAGCGAG, GAAAGAAACCTAGAAAGTGA, GAGGACAAGCCACAAAGTGA, GAGGGAAACCAGGAAAAGCA	6	3711, 2544, 5469, 1118, 296, 7890	0.2729	79	0.1975	79	1	1	4	6
CENPM	CAAGTGCATGGGCCGAGTGT, CACCAGGCAAGTCCCACACT, CTGCTCTCCCCGCAGGTGGA, GCAAGTGCATGGGCCGAGTG, GGCCGAGTGTGGGACTTGCC, TGCCAGACCTTGAGCACACC	6	62, 2909, 7900, 1877, 1158, 1409	0.2827	87	0.2085	88	1	1	5	6
ALKBH6	ACAACCTGCTCCACTCTGAA, CTCCACTCTGAACGGTTCCA, CTTCATCTCCAAAGAAGAGG, GGGAGAAAGTTACAGAACTG, GGTGGGCTTCCTCATCCCCG, GTGGGCTTCCTCATCCCCGA	6	2624, 1179, 70, 2177, 2370, 3382	0.2878	91	0.2149	92	1	1	6	6
SP140	ACTTACTTCATACATCTGCT, CAGCAATCTCAACTTCAGGT, GCAGAGATCCAGAACGTAGA, GCCAAGCTCATGGCCCAGCA, GTTCTTCAGAGAAAACAAGG, TGGCCCAGCAGGGCCAGCAG	6	4425, 2328, 1205, 2094, 2208, 65	0.2942	94	0.2221	95	1	1	6	6
SAP30L	CAACGCCTCCTTCAGCAAGA, CCAGAGCTGCTGCCTCATCG, GCAGCTCTGGCCGTAGCCCG, GCCCGGGGCGGGGAGATGAA, GCTGAAGGAGGCGTTGCCCG, GGAGATGAACGGCTTCAGCA	6	4222, 2858, 229, 6177, 3061, 1215	0.2966	97	0.226	98	1	1	5	6
INO80C	CTTCCACTCCCGGAATAGTC, GGTCCTGTGCTAAACTCAGA, GTGCCCTCTGAGTTTAGCAC, TACCTGCGCAAAGCTGGAAG, TAGTCCGGAACAGCAAGAAG, TGCCAGCTACTGCGCCACCG	6	3094, 221, 6176, 6379, 1221, 2870	0.2981	99	0.2274	100	1	1	4	6
SRY	ACAGCTTTCAGTGCAAAGGA, AGTTACAGCTTTCAGTGCAA, GAAACGGGAGAAAACAGTAA, GCAAGCAGCTGGGATACCAG, TCAGAGATCAGCAAGCAGCT, TCGTGTGGTCTCGCGATCAG	6	1372, 1228, 283, 1894, 1225, 2158	0.2991	100	0.2289	101	1	1	6	6
CSNK2A2	AACTGGTTCGAAAACTTGGT, ACCATTTGGCACCTACCACG, CCGCGAGTACTGGGACTACG, GCTCCTCAGACTGTTCACCT, GTTCACCTCGGCGTAGACCC, TGACACTGTAAAGGACCCCG	6	3297, 4497, 1226, 4296, 7352, 24	0.2993	101	0.229	102	1	1	5	6
HEYL	AAGCGACCCAAGGAGCCGAG, AGAGAAGGCGAATCCGGACG, AGCCAGGAAGAAACACAGAG, CCAAGCGTCGCAATTCAGAA, GGGTCCGTCGGACTCCCCGT, TTCCAAGCTGGAGAAAGCCG	6	2634, 1348, 1270, 467, 1514, 2215	0.3101	112	0.2413	113	1	1	6	6
UTY	AATTCTTGCAGCAAGCGTAG, ACTCTGGTCAGAGCACCATG, CCTTGGCTCGACAAAAGCTG, GTATCTCCAAAAGTCTTTGG, GTCTCTAATCGACAACCACA, TGATGAGGCAAAGAAAATGG	6	240, 2851, 1279, 2081, 3471, 6323	0.3123	113	0.2434	114	1	1	5	6
PWWP2B	CCAGGACCATCAAGCGCACG, GCCATGGCTGTCGTTGACAG, GCGGCGAGCGGAGCTTCGCG, GGACCATCAAGCGCACGCGG, GTCCGGGGCTGGCCTCCGGG, TCGAAGTAGGGAGGGTACGG	6	3419, 4203, 147, 4288, 3373, 1305	0.3186	119	0.2515	119	1	1	6	6
ABAT	CTGTTGGATGAGTTTCAGCA, GTGAATGGCTTTAGAGTGCG, TGATGAAGACGGAAGTCCCA, TGATGGGCCTCTGATGAAGA, TGCAATTACGAAGAGAGCCG, TTCTTTCTCCAAGAATGCAG	6	5603, 7298, 1903, 3133, 1310, 395	0.3198	121	0.253	121	1	1	4	6
IDH3G	CATTGTCCGGGAGAACACAG, CCAGGTTCTAGGCGCCCACG, CGTCCGCTAAGTATGGCGGG, GCTCACCCTTCAGGGCCACG, GGCCATCCGCCGGAACCGCG, TTGTTTCGAGATTTGTGCGA	6	1323, 6171, 319, 6020, 2497, 3411	0.323	126	0.2571	126	1	1	4	6
EGLN3	ACAGGGCACGATGTACTCCA, CAAGCAGCTGCACTGCACCG, GCAAATACTACGTCAAGGAG, GCCTGTCGATGAGGGACAGG, GGACCTGGAGAAAATTGCCC, TCTGCGGGCGAGATGCCCCT	6	4526, 1857, 2659, 2033, 1328, 367	0.3242	127	0.2585	127	1	1	6	6
PLD6	AAGAACAGCGCCTCGCGCCG, ACGCTGGTGCAGCAACTGCA, GAGCTGGCCGAGCTCCCCGA, GGAGCTGGCCGAGCTCCCCG, GGTGCAGCAACTGCACGGCG, GTCTCAGGTGACCTGTACCG	6	2250, 2227, 2002, 1362, 352, 2792	0.3325	133	0.2683	133	1	1	6	6
HDAC6	AGCGGGCTGCCACAGCCACG, CTATTGCATGTTCAACCACG, GCTAGATTGGGGATAGAGCG, GCTGCTTCCCAGGTTCTGAA, GTAGATTGGGATGTGCACCA, TGAACTGTGTTCCTTGACCG	6	5736, 378, 1394, 3438, 6024, 3445	0.3403	140	0.2792	141	1	1	4	6
OGFOD3	CACCGATGTCGTCATCACCA, CAGCCTCTGCACCTCCCGCG, CCTGCAGCGTAGCTGAAAAG, CCTGCTCTGGAGCAGCTTGG, GCCGCAACCAAGGCGCCCGA, TCCCTGCCACGACCTCGCCA	6	1395, 5170, 91, 7022, 1786, 4845	0.3406	141	0.2795	142	1	1	4	6
ASH1L	AGCACTGTAGAGGTTTCAGG, GCATGCATATAGGAAGGAGG, GCCACCACTTTAGTCCACCG, GGAGAAGTGCAATATACAGG, GTACTACAAGAAGCCTTAAG, TAGTTGGCAGAAGATCTCGG	6	3717, 3325, 449, 4142, 1477, 7354	0.3606	160	0.3052	161	1	1	5	6
CPSF7	GAGCAAATGGCCAGTCCAAA, GCAATTCTGTATACCTACAG, GCTTCATAGGAATACCTCCA, GGAGAAGCTGCCCACATAAA, GTAGGTATACAGAATTGCAG, TTATCCACACGAGCAGATGA	6	1481, 1867, 1626, 2361, 217, 2280	0.3616	161	0.3065	162	1	1	6	6
HMGB2	AAGGAGACCCCAACAAGCCG, AGAGCACAAGAAGAAACACC, GGAATTCTCCAAGAAGTGTT, GGACTCTTCCGTCAATTTCG, GGAGAATTCCGCGAAATTGA, GGAGACCCCAACAAGCCGCG	6	5811, 6301, 2354, 473, 1489, 1624	0.3635	162	0.3092	163	1	1	4	6
ADO	CGATGTTCAAGTCCTCGGCG, CGGCGCTTCCGATCGCGACG, CGTCGCGATCGGAAGCGCCG, CTACATGCACATCTACGAGA, GGAAGGTGAGGCAAGCCTGG, GGCGTGTTCCTGCTCAAGAG	6	3680, 354, 1507, 5238, 2690, 2117	0.3679	169	0.314	170	1	1	5	6
PCGF3	AGCGGAAATGAGAAAGCAGA, CACTCACCCGATGTACTGCA, CAGCGGAAATGAGAAAGCAG, CTGCCTGGTGAAGTACCTGG, GTACCTCATCGACGCCACCA, GTGCAGACACTCGGTCACCG	6	2045, 492, 1526, 7182, 3974, 4628	0.3726	175	0.3185	176	1	1	5	6
HTATIP2	AAGTCACGCTCATTGGCCGG, GAGGAAGCTCACCTTCGACG, GCTGGCGCCCAAAATAAAGA, GGAAGCTTATAAAAATGTGG, GTCTTCCCGAAGCTTCGACA, TTAAAGGAAATCCTGGAGCA	6	1541, 3782, 5453, 444, 2121, 4059	0.3762	180	0.3229	181	1	1	5	6
CD3D	ACATGGGTAGAGGGAACGGT, AGCCTTACCTTGCGAGAGAA, ATTGCAATACCAGCATCACA, GACATTACAAGACTGGACCT, TCCTCTATAGGTATCTTGAA, TTGCAATACCAGCATCACAT	6	3682, 435, 2601, 2630, 1561, 1815	0.3811	187	0.3289	188	1	1	6	6
BABAM1	CCAAAGCTGGAGTCGTTCAA, CCTCACCCTCACCCTCGCTG, GCACTCGCTCCAATCCTGAA, GGTCCAAATTCGGACACCAA, GGTGGTGGTGAACGATGACA, TCAGGATTGGAGCGAGTGCG	6	2894, 4889, 136, 4083, 1570, 2704	0.3833	188	0.3314	189	1	1	6	6
HCFC2	ACCATCACAGACAAATCCAT, CGCCCGGCACGGACACCGAG, GAGAAGCTATGTCCAAGCCG, GCTCCCGGATGGCCACCGCT, GGACAAGGAGGTAAACCAGA, TATGAGTTGGAGCTACAGCA	6	1575, 3142, 3973, 2417, 3894, 101	0.3845	189	0.3331	190	1	1	6	6
HIST1H2BH	CGGCATCTCCTCCAAAGCCA, CTACTCCGTATACGTTTACA, GAAGCGTAAACGCAGCCGCA, GCATCTCCTCCAAAGCCATG, GGCATCTCCTCCAAAGCCAT	5	2416, 405, 4655, 1904, 8155	0.4006	208	0.3378	195	1	1	4	5
MCEE	CAGCCCTTGGATCAAGTGAC, CTACATGGTTGAGTCGACCC, GAACCTGTCACTTGATCCAA, GGTTGCTTTCCAAAATGGCG, GTATTCACCTACGGCATTCG, GTTGCTTTCCAAAATGGCGC	6	259, 4477, 4518, 1603, 5506, 5970	0.3914	196	0.3412	198	1	1	4	6
TDRD5	CATCGGCGAGTACCTTACCG, GCGAGTACCTTACCGAGGAA, GGTTGTATCTAAGTTCCCAG, GTAACAGAGGAAAAGCCGAG, GTAGACAATGAATTTCTAGG, TTACAGTACCACCTGCACCG	6	4703, 2734, 1620, 458, 6610, 5589	0.3955	203	0.3468	205	1	1	4	6
NAA60	AATCCGCTCCACTTACTCGA, ACAGGTGTGAATGACAGAGG, CCCACAGGTGTGAATGACAG, CTTTAAACTTTCAAGTAAGA, GCCATCCAGCGCGCTCAGCG, TCCCTTGCTGCAACCTACAG	6	1630, 7157, 4345, 5867, 56, 1634	0.3979	206	0.3497	208	1	1	4	6
LIMD1	CGAGTTTGAGGAAACTCGCA, GCAGGAGGAGACTCTGCCCA, GGTCCACTGCCTCCTCCCAG, GTAGAGGCCCTGTCAATGGA, GTGGGTGGCCTAGCTCCCCG, TTTAGGGGATGGTCCCCGCA	6	3929, 7977, 5579, 1692, 331, 3877	0.4131	222	0.3689	223	1	1	4	6
SMC1B	ACATTTGCAAGGATTATCCG, ACGTCAGCAAAAGAGAGCAG, GATGCAGGTGAACCTCCGGA, GCTCAGTTACCAGAGCCGTT, GCTGATTTCCTCAAAAAACT, GGAAGGGGCCAATGACCTGG	6	4688, 1695, 6843, 236, 2407, 1766	0.4138	224	0.3702	225	1	1	5	6
PRDM8	AGACTTCCACAACCTGGCCA, AGGAAAGAGGAAATTCCCGG, AGTCCCCAAGACGAACAAGG, CCAGCCCAGAGCCTCAGCAG, CCCCAAGACGAACAAGGCGG, GTAGACACCTCAGCAGCAAA	6	1697, 2606, 4402, 446, 3846, 3713	0.4143	225	0.371	226	1	1	6	6
KDM1A	AATAATACTCATCTTCTGAG, CGAGTTGCCACATTTCGCAA, GATGTTATCTGGGAAGAAGG, GCTGGGCCCGACAGGCCCGC, GGAATAGCAGAGACTCCGGA, GGGCCTGTCGGGCCCAGCCG	6	8586, 1707, 5049, 2829, 6146, 249	0.4167	229	0.374	230	1	1	3	6
PKN1	GCTGAAGGTGAAGCAGGGGG, GCTGCGAGAAGAGCTCGCTG, GCTGCGGCACCACTTCCGAG, GCTGCGGCGGGAAATCCGCA, GCTTAAGCTGGATAACACAG, GCTTCTCCAGGCCCGCCACG	6	2741, 4108, 2017, 48, 1721, 2809	0.4202	232	0.3788	233	1	1	6	6
PRKCB	AATGTGCCTGTGCCACCAGA, CATCCAGGCCCACATCGACA, CTGAAGTTCAGAAATCCCAA, GGGCTGCTTGAAGAAGCGGG, GTGAGGCCAATGAAGAACTG, TTAAACTTGTGTTTGCTGCG	6	4071, 1763, 2864, 6443, 4306, 447	0.4304	242	0.391	243	1	1	5	6
PBXIP1	AGACCTGCAGGAGACCACCG, AGTGGGGGTAGAGGCCCACA, CAGACCCTCCATGTCCACGT, GCAGGTCCTCCCAGACCCCG, GGAGAATGCCCAGCTCCGGG, TTAGAATGCTGCCAGACTGA	6	7925, 431, 1782, 3359, 2781, 3255	0.4351	246	0.3968	247	1	1	5	6
SUV39H2	AAAGCTCTACAAGATGGCGG, AATCGATTGGAATCACCAAA, AGTGAAGAAGCTGAAAGACG, ATGAAAGCTCTACAAGATGG, GCCAGATTCTACAAATACTT, GTATCAAGTGAAACTAGGCA	6	414, 4869, 2598, 1790, 2897, 5693	0.437	248	0.399	249	1	1	5	6
TET1	ACAAAGTTCATGCAACACGG, AGTGCTTTACTCCCAAAGCA, CCTGATATAGAGACTCTAAT, GGAAAACAAGAGGCCCCAGA, GGTCCTAGCAAATCAGACAG, TCATGTTGTCAACACCACAG	6	3246, 3567, 1791, 3230, 396, 3893	0.4373	249	0.3993	250	1	1	6	6
PRDM6	CAGCAACTCTTCCCTCACGG, CCTGGCCTACGGCATCTGCG, CGCAGGTTGCGACATGTGCG, CGGCGCGCTCAGGAGACCCG, CTGAAGCCCGGAGACCCCGG, GCGCTTCCGCTGCAGCGCAG	6	3233, 1820, 148, 5383, 4988, 4242	0.4443	258	0.4089	259	1	1	5	6
HEY2	AGTGCCTAACAGAAGTTGCG, CATGGACGAGACCATCGACG, GGAGCGAGAACAATTACTCG, GGGGAGCGAGAACAATTACT, TCAGCACTTGCGCCACCCAG, TGCGCGGTACCTGAGCTCCG	6	2258, 2459, 5779, 494, 1834, 3799	0.4478	261	0.4135	262	1	1	5	6
TNP1	AAGAGCCGATCTCCTCACAA, CACAAGGGAGTCAAGAGAGG, CCTCACAAGGGAGTCAAGAG, TAAAGAGTCATGGCATGAGG, TGACTCCCTTGTGAGGAGAT, TGCCATGACTCTTTAATTTG	6	4323, 1836, 470, 5499, 1965, 2403	0.4482	262	0.4144	263	1	1	5	6
ARL2BP	AAATTCTGCATCAGAGGCGG, ACTGCGATGGACGCCTTAGA, ATCAAATTCTGCATCAGAGG, CTTACGTATTCATTAAAAAT, TATTTAGAGGACATTATCAT, TGCTGTGGTTGGATATTTAG	6	5661, 5968, 4174, 374, 3016, 1864	0.4551	270	0.4224	271	1	1	4	6
EZH1	AACAGCATCACTAATCAGAA, CACTAATCAGAACGGATCCA, CCAATGCCAAGTCTGTGCAG, CCAGTAAGTGATACATTTGG, GCGTTTATATACATTAGGGG, TGCGACTTCGACAACTTAAA	6	1879, 3531, 6878, 5054, 2958, 469	0.4587	274	0.4262	275	1	1	4	6
ASPHD2	CGTGTGGTACTGTTATCACG, GCCCTCCATCCAGAAGCCCG, GGTGGTGTCGCAGTCCCGCA, GTACTGTTATCACGTGGGCA, GTCCCGGGAGAAATAGGGCG, TCAGTCCTCGGGGGTCCCAA	6	5063, 4802, 4970, 2077, 410, 1898	0.4634	279	0.4318	280	1	1	5	6
DLX5	AGACGGATGGTGCATAGCTG, AGCTTTGCCATAGGAAGCCG, ATAGCTGCGGACGTCTGGAA, GAAAGAAGTGACCGAGCCCG, GTAGGAGAGCAGTAGCCGTG, TGACTACTACAGCCCTACGG	6	4715, 7515, 4514, 1941, 306, 4411	0.4739	290	0.4442	291	1	1	5	6
SNCA	GCAGCAGGAAAGACAAAAGA, GCTGCTGAGAAAACCAAACA, GGACTTTCAAAGGCCAAGGA, GTAGGCTCCAAAACCAAGGA, TCTTTGGTCTTCTCAGCCAC, TGTAGGCTCCAAAACCAAGG	6	5713, 4857, 6671, 79, 1954, 5240	0.4771	294	0.447	295	1	1	3	6
PRMT7	AGTACCTTGCAATCTCCTGG, ATAAACTTAGGAAAATTGTG, CAGCCACTCCACAGACCCCG, GTCGGGCCAATCCGACCACG, TATCAACAAGCATTCCACCG, TGAACACTATGATTACCACC	6	1966, 4054, 3559, 161, 2423, 5928	0.48	298	0.4501	299	1	1	5	6
ANKRD1	AGAAACGTAGGCACATCCAC, AGAGCAGCCTTCAGAAACGT, GAAAAGCGAGAAACAACGAG, GACTCCTTCAGCCAACATGA, GTTGCTCCCCCAGGGTCACA, TTTCCACTGTTGCTCCCCCA	6	1971, 2337, 94, 2241, 2326, 2562	0.4812	301	0.4514	302	1	1	6	6
STK3	AGTACTCCATAACAATCCAG, ATTCGTTACCTCTTAGGCGC, CGTTACCTCTTAGGCGCCGG, GGATGTATATCAGCATAAGG, TATTAGAGAAGCTTGGAGAA, TTTAATTGCGACAACTTGAC	6	3538, 4102, 316, 2203, 1983, 2503	0.4841	307	0.4546	308	1	1	6	6
SRSF9	GCGAGATCGAGCTCAAGAAC, GGCCCATTCCTCCCACCACG, GGCTGGGCGGACGAGCGCGG, GGGGTCCTCGAAGCGCACGA, TCCTTCTCGCGCACGTCGGT, TCGAAGCGCACGAAGGCGAA	6	450, 4515, 6720, 1986, 4885, 4983	0.4849	308	0.4556	309	1	1	5	6
JARID2	ACTGGAAGAGGCACACCAGG, CGAACTTCTCCACCTGAGCG, GCAAGCTCAACGATGAGATG, GCTGGGGCCCCAACGTGCAG, TAGCTGAAGCCTGCTCCCGG, TGAGATTGTGTGGTTGACAG	6	366, 5644, 5280, 2797, 7483, 1992	0.4863	309	0.4568	310	1	1	3	6
MEIS1	CTTTAAAGCGTCATTGACAG, GACGATCTACCCCATTACGG, GTGCTAAGAGAGGGAAGAGG, TCAAACAGCTAATATACCGG, TCGTCTATCACCAAATCGAT, TCTGGATTAGAAGAAAATAG	6	85, 4276, 7249, 5061, 3490, 2008	0.4902	315	0.4623	316	1	1	4	6
TNKS2	ATGTCCATGCTAAAGATAAA, CCAACCATCCGAAATACAGA, CCTTCCATCTGTATTTCGGA, GTACAGCTGTTACTGCAACA, GTTCGAGGCGTGCCGCAACG, TGAGGCAGCTTCTAAGAACA	6	2120, 3022, 2012, 125, 3792, 5536	0.4912	317	0.4636	318	1	1	5	6
EID1	ACTGCTCTCTTCATACAGCT, ATGGATGTGATGCCTGGCGA, CCGCAGATGGAGGTAGGCAG, GATGGATGTGATGCCTGGCG, GCTCGAGGAGGAAGGCCCAA, TGTTGGGCCCCGCTGCGGGA	6	2019, 2773, 3997, 4295, 4300, 495	0.4929	321	0.4656	322	1	1	6	6
P4HA2	ACCCAGGCACAATTTCCAGA, ACTGGAAGACAGCATAGCTG, CCAGTTTGTAGGCATTCACA, CTATCTCGTCCTCATCAGTG, GTACTTTGAGCAGTTATTGG, TCGCCAACCTCTCTGTGCAG	6	3323, 415, 3011, 4119, 2140, 3342	0.5225	361	0.4996	362	1	1	6	6
MTDH	ACAACCGCATCATTTCCTGT, CCACCAGGATCACCCAGCCG, GCGGGCGCCGGCGCAAGCCG, GCTCGGTGCGCAGAAAGCCT, GCTGGGCTACGGCTGGGCCG, TTATTCTTCTTGGAACCAAC	6	4198, 3496, 224, 6063, 5507, 2256	0.5508	396	0.5351	397	1	1	4	6
HMGB4	AGAGGAAGAAACGGAGAAAG, AGAGTTCTCTAGAAAGTGTT, ATGTTGGCAAGAGGAAGAAA, CTAGAAAGTGTTCGGAAAAA, GAACTCTTTAAAGCCAACAT, GGCTTTGTCGAGTTTGGCCA	6	2264, 2408, 4814, 451, 3178, 3031	0.5527	399	0.5382	400	1	1	6	6
CHD8	CTCAAGCCAAGAATGCCCAA, GATGAGACACTTCTTCCATG, GCAAGATTCGAGAATTTAAA, GCCCTATGAGGATAGCACAT, GCTTACCACAAAGAACTGCA, TCTGGTGCCTCCAAAACAAA	6	7411, 7701, 2320, 7797, 8688, 313	0.5664	419	0.5544	420	1	1	2	6
TSHZ3	CCCTCCTCGGAGAAGAACAA, CTATGGCTCCATCTTCACGG, GCTCCTTGCTGGAAATGGAA, GCTCTGCCGGTACAGCTGCA, GTGCACCGTCAACTCCACCA, TTCATGGCAGGAAAACTCGG	6	2334, 3587, 2723, 211, 3864, 3085	0.5698	421	0.5581	422	1	1	6	6
PHF20	AAGCATCCACCTAACAGACG, AATCTCTTGTAATTCCACAA, AGAACCACTCATCATAACGA, AGGGAACCCAAAAGAAAACG, GGAAAAGTCAAAAAACTACT, TTATGATGAGTGGTTCTGCT	6	3663, 4257, 2514, 2379, 326, 4536	0.5808	436	0.5711	436	1	1	6	6
KDM4D	AGATAATTCCACCCAAAGAA, CATCAACTACCTGCACCTTG, CCACATGCCAAAGTACAAGT, CCTGCTGGAAAAGGAATGTG, GATTTCACTGATATTATCAT, GCAGGTCCTGAATTGTTCCC	6	466, 2401, 4499, 6463, 3933, 3901	0.5862	442	0.5761	442	1	1	5	6
SMYD5	ATAAGCTTCAGGAGGCATGG, GCCTCCTGAAGCTTATTGAG, GCTTATTGAGAGGATGCAAG, TCTCTAGTGCCCTAAGGCAG, TGATGCTTGCAGTCTCAGGT, TGTACTGCAGTGCAGAATGT	6	2410, 4977, 5210, 1, 3281, 3986	0.5884	445	0.5779	445	1	1	5	6
NACC2	GCAGCTCGTGGTCATGTACA, GCCCCGTGTCTCCTACTACG, GCCGGCGTCCTCGATCACAG, GCTCACCTTGAACATGAGGT, TACTTCCGCGACCTGTTCAG, TGTTGCCGCTGAACAGGTCG	6	2893, 4173, 2973, 2415, 2783, 491	0.5896	447	0.579	447	1	1	6	6
ANP32E	ATAATTGCCTGTGTGTCAAT, GAGTCATCTCACCTCCTCCG, GATGAAGAAGAAGATTAACC, GGAGTTAAGGAACAGATCCC, GTTAAGGAACAGATCCCCGG, TTTCGAAGTTTATTTAAGCT	6	3913, 2441, 7840, 4117, 2953, 143	0.5959	453	0.5845	453	1	1	5	6
SETD6	AGAACATCGGGTGCTCCAAG, CGATGGACTGGTACTCGCTG, GGAACCACTGGAGGAAGAAG, GGTGTGCTGCGACAGGAGCG, GTTGGCCAAATCCTTCTCCA, TGACCTATAGGCCATCACAA	6	3116, 4111, 4231, 142, 2455, 5746	0.5994	458	0.5879	458	1	1	5	6
ALDH7A1	GAAAGAGCTGGGGCTCCGCG, GCCAATAGCAAGAGTCCGAC, GGGCTCCGCGAGGAAAACGA, TCAATCAGCCCCAGTATGCG, TCCAACCATACACTGCCACA, TCTTTCAGCCACGCATACTG	6	2462, 5783, 4830, 4418, 3977, 329	0.6011	460	0.5899	460	1	1	5	6
CDKN2A	ACGAAAACCCTCACTCGCGG, CCTCAGTAGCATCAGCACGA, CTACCTGGTCTTCTAGGAAG, GCACGCGCGCCGAATCCGGA, GCCCACTCCCCCGTGAGCCG, TCACATCCCGCGGCTCACGG	6	5622, 4151, 2463, 2594, 334, 4287	0.6013	461	0.5905	461	1	1	5	6
NOC2L	ATGGGGACAGAGTCCCCAGA, CCATCTCTCAACCATGGCGA, CGAGTTCTACAAGTTCCTGC, CGGAGTCCGGATAAGCCGGG, GGAGACACGGGAAGCACGCG, TGTTCCTGTGACCGTCGCCA	6	67, 7747, 7631, 6163, 2466, 8165	0.6021	462	0.5911	462	1	1	2	6
PCGF1	ATTGTTTGCTGCCTATGCGC, CGGGAATTCTACCAGTCCCG, GAGGGTGTATCTTCAGGAGG, GCTCCAGTCAGTGTACAAGA, GGTGGCATCCACGAAGTAGC, TCCAGTTTGAGGTTGAGCAG	6	6364, 241, 2516, 6670, 8740, 8130	0.6143	473	0.6036	474	1	1	2	6
DTX3L	AGAAAAATGGAAGGTCACGA, CCTGTTCTCCAAAGAGCAGA, GTACACCCGCACGAGGAGCG, TCACAAGCAGAAACACCGTC, TGTGGATTCCTGTCTCCAAA, TGTTGATGCATATCACCAGA	6	286, 2617, 6164, 2572, 4523, 2772	0.6279	488	0.6195	489	1	1	5	6
HIST3H2A	AGTCAAGTACTCGAGCACCG, AGTCGCGCTCGTCGCGCGCG, CACCGCGGCCAGATAGACCG, CGCCCCGGTCTATCTGGCCG, GCGGGGCTGCAGTTCCCCGT, GGGCAACTATTCGGAGCGCG	6	6477, 3824, 2574, 5758, 2997, 246	0.6284	489	0.62	490	1	1	4	6
PHF2	AGTGACGTCGAGAACTACGT, ATACAGGGAGATGTTGGCCG, CGACAGTATTCACTTCCGGT, CTTACAGGTGGACTTCCCAT, GCTCACGCTGGGCTACATGG, GGTGTCAGAGAACTCGAGGT	6	364, 5648, 3377, 6424, 2646, 7867	0.646	505	0.6405	507	1	1	3	6
SMYD2	ACGTGCTCACGGTCAACGAG, AGAAGCGCTCCAGGCCGCCG, CCTGTGCAAAGAGTACTACG, GTTAGTCTTACAGTCTCCGA, TGGTGAAGCAGTACTCGCAG, TGTTAGTCTTACAGTCTCCG	6	7314, 212, 3742, 7021, 4616, 2732	0.667	529	0.6649	532	1	1	4	6
PRKD2	AATCGGTGCGACACACGACG, ATACGATGAGGCAGAAGAGG, ATTGCACCACCCTCATTAGG, CACAAGGCTGAAGTTCTGGG, GCTGTCAGAAATCCTCACGG, GGAGGCCACCGATTTCAGCG	6	131, 2769, 6643, 3788, 5326, 6499	0.676	539	0.6748	542	1	1	3	6
CCND1	ACATTTGAAGTAGGACACCG, AGGAGGTCCTGCCGTCCATG, CCGCACCTCCAGCATCCAGG, CGTGCCTCCGTAGGTCTGCG, GGTCTCCTCCGCCTTCAGCA, GGTGGCGACGATCTTCCGCA	6	3300, 4667, 4033, 41, 2793, 4103	0.6819	544	0.6802	547	1	1	6	6
SIRT5	AGTTGAGAAACTTCCCCGGT, CCATTCTTCCAGGTGTGAAG, GGGTGATGACCACGACTCGC, TCCCAGTTGAGAAACTTCCC, TCTCACACTCGGCTATGGCG, TCTCACCATGGATCTCCAGA	6	2796, 3649, 7120, 6821, 9077, 190	0.6826	545	0.6806	548	1	1	3	6
SMC4	ATATGAGTTATCATAAGCCG, CATTGATGAAAAATACGACG, GCCTTAAACAGGAAACACAA, TGACGGCGCCAGCAGCGACG, TGAGCCGCCGTCCGGCCGCA, TTAATTTCTGTAGTTAAACA	6	5161, 6608, 8692, 2878, 8619, 477	0.7026	572	0.7001	575	1	1	2	6
SALL1	CCAGGAAGCGAGGTGCGGCG, CCTCATACCCTTCATCAAGA, CTCCCATGTCAGCAACCCAG, GGAACAGGTTCTCCACCAAG, GTGTTGCCAGAACTGCTCTG, TAGCGTCCTGAGCTCCCCAG	6	436, 2982, 4373, 4921, 3003, 6441	0.728	600	0.7207	602	1	1	5	6
CTSL	ACTGCACAATCAGGAATACA, AGATGTTCCGGAAAACTGGG, CTGGGGGCCTCATAAAACAG, GCTTTCAAAACCGTAAGCCC, GTTGTGCATCGCCTTCCACT, TCTCCAATCCACAGATCTGG	6	4656, 2988, 3629, 3904, 3164, 4	0.7295	603	0.7216	605	1	1	6	6
H3F3B	AAAAGCGCTCCCTCTACCGG, AAAGCGCTCCCTCTACCGGC, AAGCGCTCCCTCTACCGGCG, AGCTGGCCACGAAAGCCGCC, CTGCTCGTAAGTCCACCGGT, GAAGCCTCATCGCTACAGGT	6	5489, 4035, 7509, 218, 3132, 5456	0.7646	640	0.7545	641	1	1	3	6
HDGF	AGTTTGGCAAGCCCAACAAG, CCAGAGCCCGAAGCTGCAGA, CCGCGGAGCGCTCACCACCG, CTTCCCTTACGAGGAATCCA, GCAAGCCCAACAAGAGGAAA, GTGGATTGAGATGGAGCAGA	6	8911, 5666, 3148, 73, 4511, 3524	0.7686	647	0.7584	648	1	1	4	6
HMGB3	ACATAAGAAGAAAAACCCAG, AGGATCCTAATGCTCCCAAA, CTGCACAAAGAAGGCATAAG, GATTATGGACCAGCTAAGGG, GGTGACCCCAAGAAACCAAA, TTTCCAAGAAGTGCTCTGAG	6	8362, 3243, 95, 8461, 7282, 7159	0.7917	674	0.7779	675	1	1	2	6
SCAND1	GCCCACACAGTTACGCTCAG, GCCTTCCAGTCCCAACGCCG, GCTCCTTCCAGTTTCTCCGG, GGCGGCCACTGGGAGTCCCG, GTGCCACCGGAGAAACTGGA, GTTGGGACTGGAAGGCTCAG	6	3339, 233, 4909, 6340, 3801, 7435	0.8152	696	0.7946	697	1	1	4	6
EPC1	GACCGCCTAGAAAAAGGCAG, GCAGGTGTATGGCGAGAAGA, GGTCGGGCAGATCCTCACAG, GTAAAACAAGAGAAGCGAGA, GTAAACTGTCGTTTCGGGCG, TCTTCCTTCTCCATTCCGGT	6	3443, 5135, 3797, 6673, 84, 3379	0.825	706	0.8016	706	1	1	4	6
SUPT3H	CAAGTAGTGGAAGGAGTACA, CTTCATGAAGACAAATTGAG, GATGAGGATGATCTTCTCGA, GCTGAAGTTTCTCAGCTGCG, TCTACTGCAACTTCAAGTAG, TTCTCAGCTGCGGGGAGCAA	6	4626, 5137, 3442, 430, 5837, 6243	0.8403	717	0.8125	717	1	1	3	6
RCOR2	AGTGATGGAGAAGCCGAGCG, CCTGGTAATTGGTTCCAACG, CTCGGAGGATGACAGCAGCG, GCTTGGCATCTGACACACAG, GGGCGACGCCGGGTTCGCAA, TGATGGACAGACAGGCCCGG	6	6, 6782, 6248, 3487, 5560, 5260	0.8513	726	0.8212	726	1	1	2	6
H3F3C	AAGCACCCCCTCTACCTGCG, ACTGCTCGTAAATCCACCGG, CAGACTGCTCGTAAATCCAC, CTGCTCGTAAATCCACCGGT, CTTCACCCCGCAGGTAGAGG, GCTTCACCCCGCAGGTAGAG	6	3493, 3647, 6580, 5369, 158, 4394	0.8528	728	0.8217	728	1	1	4	6
YAF2	AGTGCATGATGTGCGATGTG, ATGATGTGCGATGTGCGGAA, CACCTTCCGGAACAGCGCCG, CATCATGCACTTGAAGGCCT, GCAGGGACAGCAAGGAAGGG, GTCCCAGTAACCCTCATCCG	6	373, 5387, 5262, 3570, 7100, 4584	0.8716	738	0.8333	738	1	1	3	6
BRE	AGGATTTGAAGGATTCCAGG, GACCACGCTAGATATGAAAG, GGACCACGCTAGATATGAAA, GTACTCACCTGCAAAGCTGA, TCTCCAAAGATAAAATCGGG, TTACCTTGAGAAGGTATGTG	6	6707, 6040, 7744, 5026, 471, 3695	0.9021	765	0.8528	765	1	1	2	6
MED10	ACTTACTCAAAAACTTCTAA, AGAAGTTCGTGGAGAACATT, GGAGAAGTTTGACCACCTAG, GGAGCACCTGGAGAAGTTCG, GGGACGGGCCGAGGCGATGG, TCTCCAGGTGCTCCTCTAGG	6	5630, 8019, 3699, 300, 4474, 8836	0.9031	767	0.8534	767	1	1	3	6
CENPV	AGAGCTCCTCGATCGCCGCA, AGCCGCCGTCGGAGAAGCCG, GCGCGGGCAGAAGCGGTCCG, GCGGCGATCGAGGAGCTCTG, GGCCGGGAGCAAGAGCCAGG, GGCGACGAGCGCCTCAGCCG	6	4784, 5068, 40, 6120, 3731, 6977	0.9109	775	0.8568	775	1	1	3	6
SIK1	ACCTGAGTGAGAACGAGGCG, CTTCCCCTCAAAGACTTCCG, GCATCGAGTCACCAAAACGC, GGTCCACCACCAGCATGCGG, GTTCTCACTCAGGTGCCCGT, TATCATGTCGGAGTTCAGCG	6	4838, 4065, 3740, 5191, 5511, 145	0.9131	778	0.8579	778	1	1	4	6
PCGF2	CCGACCCCGGAATCATGCAT, CCTGCTCCAAGACCTCGCCG, CTATGCAGCGTACCCCCTGA, GCAGCGTACCCCCTGACGGA, GCCGCTGCTGAGCATCAGGT, TTTCCTTCTGCAGTCCCCAA	6	3923, 6594, 4152, 6075, 390, 6229	0.9578	805	0.8809	805	1	1	3	6
WHSC1L1	ACTATCTTCTGTTCCAACAA, ATGAAAGCAGAAAAGAAAAG, CACTGTATCAGAAAAACCAA, TCACCTAGAGACCAAATGAG, TCTCTTTCTCTTTCATGCAA, TTAGTATGAACCTCAAGCTG	6	4144, 7068, 3968, 4176, 173, 4741	0.9688	814	0.887	814	1	1	5	6
CHD7	AGACGCGAGTCCGTTCCCAG, GCACGTAGCACAGATGACCG, GCATAAATGTGGTTTCTGAA, GCTGTGCTACAGTCTATGAG, GGAGAGGCATAAGTTCCCTG, GTAGGATTCCCATCAAACAG	6	17, 6233, 5148, 4645, 7448, 6661	1.13	918	0.9491	918	1	1	2	6
H1FX	CCATTCTGCTGGTCGAACCA, CCGAGGCCAAGAAGGTTCCG, CCTGCCAGTGACGACCGCCG, CGTAGGCTGGGCGAGCGCAA, CGTTGTCCCCATCTAAGAAG, GCTGGCCAAGATCTACACCG	6	4700, 5020, 5434, 282, 6760, 6042	1.15	926	0.9527	926	1	1	2	6
CTDP1	AGAGGCCCCGGAGGACTGCG, GCAGGCGCTCCTGAGCCCCA, GCTGGAGTGGAGGGTGGCGG, GGCCTTTCATGACAACCGGG, GGGGCTGCGTGCGCCCCGCG, TTTCACTTCCAGCTGGGCCG	6	78, 4719, 8299, 8305, 8802, 6406	1.15	928	0.9538	928	1	1	2	6
GPS2	AACGGAGGCGAAAGGAACAG, ACTCATCTCCTCAGCATGCA, GAGCGGGAGCGCAAGCGGCA, GCTTTCCAACGCCATGGCCA, GTATGCAGCTGATGTTAGGG, TGATGGAGCGGGAGCGCAAG	6	6382, 6491, 7343, 4777, 264, 6100	1.17	933	0.9569	933	1	1	2	6
PER2	AGACGTGCCCTCCTACACCG, CCAACGAAAACTGCTCCACG, CCACTGCACATGCTCCACAA, CCTGGGGGTCAGCTTCCCCG, GCCCAGCATGAATGGATACG, GTACTTGGAGAGCTGCAATG	6	9, 6149, 5263, 7409, 5990, 5016	1.22	964	0.9706	964	1	1	1	6
MED30	CAGGAGCTGGAAGATCTCCA, CCAGCTCCTGAGGAACATGC, CGCCGTGTTGACTTCCCGGG, GGACATCGTGTACCGCACCA, GGCCGCCCGGGAAGTCAACA, TCCCCGACGCGGCCAACGGA	6	9031, 357, 5465, 8805, 6099, 7764	1.33	1020	0.9868	1020	1	1	1	6
CIR1	AGGGCCATCGATGCACCCCT, ATAGCGGAGATGAGAAACAG, CATCTCCGCTATTAGCTCCG, GCACCCCTCGGAGCTAATAG, TCACTTGCCTGAATACCAAA, TCTCCGCTATTAGCTCCGAG	6	7265, 7453, 6967, 5546, 6948, 285	1.35	1035	0.9884	1033	1	1	1	6
TLK2	AGCTGCTCTGTGTCAAGCCG, CAGTGATGCTAGCAAAACCT, CTGCCATCTAAACCATAGAG, GGAAAGGATAAATTCACAGA, GGGAAGAGATAGAAAGACAA, TCTGACTTAGAGAAGAAGGA	6	413, 6534, 8271, 8533, 6038, 5977	1.46	1087	0.9955	1086	1	1	1	6
KDM5A	ATCTACTCTGAAGATCCCTG, ATGCGGCCGATAAAGCTGAG, CCACTACCTGATGTGCCCAA, TATCACTCTGGATTTAACCA, TCTCTGGTATGAAAGTGCCG, TGGAGATGTGAGTAGAAACA	6	7073, 7324, 6025, 8624, 371, 6622	1.47	1089	0.9961	1093	1	1	1	6
TOP1	CCAGTATTTCAAAGCCCAGA, GCTATCCTGAAGGCATCAAG, GGGCACACTCACCATTCAAT, TCAGCATGCCCATCTTGGGG, TGTCTTCCAGAAAATCAAAG, TTATGGATAACCACAAAGAG	6	7206, 8457, 439, 8150, 6576, 9046	1.61	1157	0.9993	1163	1	1	1	6
JMJD7-PLA2G4B	ACATCCAGCACGAAGCTCAG, AGAGCGTTGCGGATAATGCA, GAGCCACTCACCCCTTGCAG, GGGGAGGGACCACTTCTGGA, TCTGCACATAGAGGACTCCA	5	758, 550, 6225, 3726, 2656	0.1595	29	0.0779	28	0	2	4	5
CPA4	CCAGGCCACTGCAATCTGGA, CCTGCATTCAGCCAAACGGC, CCTTCAGTACATACATCGGC, GATGCCTGCATTCAGCCAAA, GATTGTATCTGATTACCAGA, GCACTGGGAAAGGCGTGAGG	6	1090, 6504, 2159, 661, 6683, 586	0.1614	30	0.08	30	0	2	4	6
PPARGC1A	AGTCCTTCCTCCATGCCTGA, ATATCTTCCAGTGACCCCAA, GCAATAACTCCACCAAGAAA, GCAATCCGTCTTCATCCACA, GCTGAGTTGTGCATACAACT, TTTGTACCTTAACAATTGCA	6	2468, 3944, 2460, 3588, 502, 771	0.1882	40	0.1067	40	0	2	6	6
GLUD1	ACAGCAACAGCGCTTCGCCC, ACCATGGAGCTAGCAAAAAA, CCGGGCCCAGCCCAGCAACG, CCTGCTCCAGACATGAGCAC, CGAGGCGGTGGCCGACCGCG, GCGCCACTACAGCGAGGCGG	6	5894, 1573, 779, 641, 2905, 6916	0.1902	41	0.1087	41	0	2	4	6
RCOR3	ACACAGATAAAGACAATGGA, AGAAAGGGCCCGAGTTACTG, AGCAGCGACGACGAGCACGG, GCAATTGCAAAGGAAAAGCA, GCAGATGTTGGGATGAGAGT, GTTACTGGGGAAGAACCGAT	6	603, 3528, 829, 2532, 3938, 3535	0.2024	44	0.1211	44	0	2	6	6
LOXL2	CCAGAACCTGAATATCCAGG, GACGGCCAAGAATTCCCGCG, GATCTGTGACAAGCACTGGA, GCAGAATGTTTGCCTCACGG, GTAGCGCTGCTTCCTCCGTG, TATTGTATGTCCTCTCCCCA	6	3396, 5875, 1972, 3783, 564, 833	0.2034	45	0.1217	45	0	2	5	6
TDG	AAAAGCTTGAGCTTGCTGAA, GGGAATGGAAGCGGAGAACG, GTAGAGTGTGATCATCCATA, GTTTATGTCAGGGCTCAGTG, TGGATGATCACACTCTACCA, TGTATTTCAGAGGCTCCAAA	6	839, 4313, 3759, 6049, 4722, 851	0.2078	47	0.1266	47	0	2	5	6
EYA2	ACTGGCTCTGGGGGAAGCCG, CCATACACCTACCAGATGCA, GCCAGACGCAGTACAGTGCG, GTACAGTGCGGGGATCCAGC, TCCTTCCCACAGGCACAACA, TGAGGAATCCACTCTGGCCA	6	2753, 870, 5855, 520, 3127, 1089	0.2124	49	0.1311	49	0	2	5	6
ELP4	CCAGCCCTAGACCAGCTCTT, GCAACGTCACCAGTTTCCAG, GCCAGCGTGACCAACGACAG, GTAGTGTTGCCGCGAGTACT, TGGCAGAAGGAATTGTCAAT, TTACATTTATCATCAAGTAA	6	8176, 7692, 901, 6147, 7345, 569	0.22	55	0.1398	55	0	2	2	6
TAF9	AATTGTGGTCACATATCGGA, AGGTAAAAGACTGATCAGCG, CTAGAATTGTGGTCACATAT, GATGATGGCACAAATCCTGA, GCATCTTTCGGCATGCTCTT, TATCATGGAGTCTGGCAAGA	6	5193, 590, 2350, 3956, 1280, 926	0.2261	56	0.1467	56	0	2	5	6
E2F8	AAGGCTCTCAGGGAGAGCCG, CGCAACAGAGATCAGAAAAG, CTTGGCACCTTGAAGAGCAT, GATGCTCTTCAAGGTGCCAA, GCTGTGGTGGATTCTTTCAG, TTAAAGGGCCAAAGTCAGGC	6	1346, 600, 6148, 5114, 930, 1109	0.2271	58	0.1474	58	0	2	4	6
CENPB	ACTGCCCTCCGAGGGCACCG, CCAAGGACTGGGCAGCCAAG, GAAGTCACGGATCATCCAGG, GAGAATCCGGACCTGCGCAA, GAGTTGGCGGTGTAGTCGCA, TCTCCCTACGACAAGCTCGA	6	942, 2179, 777, 1858, 3365, 8571	0.23	61	0.1508	61	0	2	5	6
AASS	GGAGACTCTGAGCATCTTGG, GTTCACATCCTCCCTCCGGA, TATTGATTATGAGAAAATGG, TCTGCATCATACATGCAAAA, TGATACAGCCTTCGAATCGG, TGTGGTGAAGACCCTTGGAG	6	2163, 3971, 4334, 951, 3718, 679	0.2322	63	0.1534	63	0	2	6	6
TBPL1	ACATCACTGTCTGCATCCAT, CATCACTGTCTGCATCCATT, CTAGAATTACAGCTACAATT, GCCCGTAGTCTGCAGAAACT, TTAAGGAAGATTGCTTTGGA, TTATTTGCACTGGAGCAACA	6	789, 2935, 4383, 1717, 963, 1705	0.2351	64	0.1569	64	0	2	6	6
GRIP1	AGGTAGTTAGGGCAACCCCA, AGTAGAGTACGAGCTTCCAC, CTACTGTACTTACAGACCGG, GCTTCGATATAGGAAATCAG, GTCGCCTCAGAATTTGACAA, TGTTCACACAGAAACCACAG	6	1294, 6264, 1000, 4010, 2135, 631	0.2441	65	0.1659	65	0	2	5	6
ETHE1	AGCCTGTAATGTGGTCCGCG, AGTGAATACCCACTGCCACG, CTGTACTGAGGGTCGCCCGG, GCTGACTTACACATTGAGGA, GGGTGACAGAGAGTCCCGGG, TTGATCAGCTGGGCATCCCG	6	552, 1005, 2040, 5792, 3586, 3716	0.2454	66	0.1674	66	0	1	5	6
SLC22A11	AAGCTCTTGGAGCAAGCCGG, CCAACATTCGTCATCTACTG, GAGAGTCCTCCAGTCCCGCA, GATGAAGGTGAGCACCTGCA, GGGAAGGTATCATGAGGCAG, TCTCCTGTGACAGGTTTGGG	6	4852, 2605, 4434, 5853, 1012, 978	0.2471	67	0.1691	67	0	1	5	6
MXD4	ACAACGAGCTAGAAAAGCAC, ACTCACCTTGATGTGCACCT, CGCCAGGGAGAAAACAAAGG, CTTCGACGGCGACTTCGCCA, CTTTCAGACGAGCCAAACTC, GGCCGAGCACGGCTACGCCT	6	1905, 1028, 4031, 5368, 5074, 548	0.251	68	0.1735	68	0	1	4	6
ING4	AAGTTTCTCTGTAATTCAAA, GACCTAGACCAAAGAACAGA, GGAAGCCTATGGCAAGTGCA, GGACCTAGACCAAAGAACAG, TACCATCTCATAGGTCTGCA, TTTGCTTCGAGATGGCTGCG	6	3577, 1039, 2391, 6381, 744, 1868	0.2537	69	0.176	69	0	1	5	6
PARP9	CTATCCGGGTTAGTTTGCAA, GCATGGATGATCTGTTTGCA, GTGGCCCTGGACAATCTGGA, TGGATGGAATGGGATAAACA, TTATCCCATTCCATCCACCG, TTCCTGAACTGGAGAGACCA	6	3374, 5094, 639, 6582, 1046, 2747	0.2554	70	0.1782	70	0	1	4	6
RAG2	AAATCCACCAGGAAAACACA, AATTGCACAGTCTTGCCAGG, ATAAGGGTTGATCTTCCCCT, ATTAATGTGGTGTACAGCCG, GGTTATGCTTTACATCCAGA, TTCACAGCTGGGCTACCCAG	6	1048, 544, 3833, 1771, 1862, 5703	0.2559	71	0.1787	71	0	1	5	6
TDRD7	ACAAAATCCAAAAGGATGCA, ACACTGGCCTCATATTTGCA, ACTGTTGGACACCCTTTCAA, GCCCACTGACAAAATCCAAA, GTACAAAGTGAAATTCCCTG, GTTGCTGGCCGTAAATGCCG	6	1814, 706, 2756, 1900, 4132, 1063	0.2595	73	0.1819	73	0	1	6	6
ATF7IP2	ACACCACTCAATACACTGGG, ACTTGCTTCCGGCAACTTAG, AGCCCCCTCATGCTCAAAAA, ATTGGGAGTAATGTTCCAAG, CTGAAACTCTGATTACCGCT, GTCTACAGTAACCAGTACCG	6	1872, 2332, 1069, 3795, 2469, 608	0.261	74	0.1836	74	0	1	6	6
MYOD1	AGAGCACTCGCACTTCCCCG, CGTCGAGCAATCCAAACCAG, GCACTCGCACTTCCCCGCGG, GCTCCGCGACGTAGACCTGA, GGGCCGGGTGCACCGCCGCG, GTAGACCTGACGGCCCCCGA	6	5569, 2989, 1084, 850, 4012, 1593	0.2646	75	0.1867	75	0	1	5	6
RRP8	CCTCAGAGTCACTTATACAT, CTCAGGCTCTTCGAACATGA, GCTTGCGGCTTAATGTATGA, GTAGGTCCCAAAGCCTGGAA, TCTTCCTCAGAGTCACTGCA, TTTCTTCCCTACTTCAGCAG	6	622, 1098, 1876, 3195, 3304, 1335	0.2681	77	0.1917	77	0	1	6	6
TAF9B	AATCACAGAGTATGAACCAA, AGTTTGCTCACATCTCTTGG, CTGTGATTCCCATATCCTTC, GCACAGATCCTGAAGGATAT, GCATCTCTCGGAGCGTTCTT, GGTGATGGCACAGATCCTGA	6	4367, 5767, 1102, 5275, 2307, 943	0.269	78	0.1926	78	0	1	4	6
UTF1	CCAGCCCCGACCCCGAGCCG, CCTTAAAGACAAGTTTCGCG, GCCCACCTACCGCCGCGTGT, GGGCCAGCGCGGCCGACACG, GTAGCGGCGGCGGCACTGCG, TTCCGGATCTGCTCGTCGAA	6	3983, 3124, 1123, 5125, 6077, 540	0.2742	80	0.1986	80	0	1	4	6
ZNF473	CCCACACTCCTGACACTCAG, GCACTGGATCACTCATACTA, GCAGGATTCTGTTCAGGAAG, GCTAAGTCTAAGGAATATAG, GGTCTGATATTGCCACCAAC, GTGTATCCGAAAACTCACAC	6	922, 2974, 5050, 5069, 1126, 1230	0.2749	81	0.1996	81	0	1	4	6
P4HA1	ACAGCGACAAAAGATCCAGA, AGCTATGCGGTATATCAGCA, AGGAAAGTACTGTCTCTGAA, GCCTTCATCCAGTTGCCTTA, GTTCCATCCACAGTTCCGTA, TGAAACGTCTGAATACTGAG	6	4057, 3860, 1128, 4823, 671, 5315	0.2754	82	0.2003	82	0	1	5	6
HIST1H2BI	GCATCTCGTCCAAGGCTATG, GGTGACCAAGGCACAGAAGA, GTTCATAATCCCCATAGCCT, TCAGCTCCCGCCCCGAAGAA	4	1741, 7951, 882, 5868	0.3151	117	0.2003	83	0	1	2	4
MAP3K10	AGTGGGGCACGACCCCCGCG, CATACTCCATCACTAGGCAG, CGCCTCGTAGTCGAACACCG, CTAGTGATGGAGTATGCCCG, CTGCAGCTAGAGGAGATCAT, GGTGCTTTCCCAAGACTGTG	6	3866, 1559, 531, 4819, 1137, 1504	0.2776	83	0.2022	84	0	1	6	6
ARHGAP35	ACGCCAACATTTCAGCCCCA, AGTGTGACGAAGGTGTTGAG, CTGAGGTCTCCACAACCTGG, GAGCAGAAACAAATGCCAGA, TCAGCACCAGTGACTTTGGA, TCTGGGACCGAGAAGGAAAA	6	2419, 1138, 2232, 3773, 4898, 672	0.2778	84	0.2023	85	0	1	6	6
GTF2A1L	CATGGCCTGCCTCAACCCGG, CTGAGGTCTTCCTTACCACC, CTTGGAAGAGTTCTACCAGC, GCATCATTAGTTATTCCTGC, TCTTCCTTACCACCGGGTTG, TGTCATGGCCTGCCTCAACC	6	6486, 1140, 701, 6271, 5165, 3460	0.2783	85	0.2027	86	0	1	3	6
RB1	AGAGCAGGACAGCGGCCCGG, ATATGGTTCTTTGAGCAACA, CTGCTCGCTCACCTGACGAG, GCTCTGGGTCCTCCTCAGGA, GGTTCTTTGAGCAACATGGG, GTTCGAGGTGAACCATTAAT	6	7347, 2313, 1142, 1382, 3264, 559	0.2788	86	0.2036	87	0	1	5	6
CRTC1	AATGGAAGAGACCACATCAG, ATCTTCTCGCTGAATTTCCG, GCACAATCAGAAGCAGGCGG, GCTGCACAATCAGAAGCAGG, GGGCAGCCCCCTTACCCGCG, TGGCGACTTCGAACAATCCG	6	4270, 1866, 876, 3185, 4166, 1161	0.2834	88	0.2091	89	0	1	6	6
KAT6A	ACAGCTCAAGAAAAGCCCTG, AGTTCAACAAGAAAACCAAA, ATTGGTGGCGAGCTTGACCG, TCACCCTCACTGTAGCGACG, TTATATGTAGACAATCAGGA, TTTGGCATACGGGTGAGTGG	6	1563, 1166, 6603, 718, 3910, 1366	0.2847	89	0.2108	90	0	1	5	6
PRDM4	CCTCGATCCCCAATACCCAT, CTGTCTTTAATGCTACCAAT, GACAGTCCGAGGGATAGGCG, GATAGGGATCTAGTGCTGAA, GGTCTGTCTCCATGACCACA, TGTCTCCTCCATCACCCAGG	6	1172, 3634, 4765, 908, 6230, 7214	0.2861	90	0.2125	91	0	1	4	6
PARP15	AATAACATCTACCTGTTCAG, ACAGCATATGAAATGAAAAT, ATAATAATTCATGTTCCTGG, CCTTGGGTATCTCCTGCCAT, GTAATTATAAAATCTCTGTG, TGAACAGAGGAAGTACACAT	6	726, 1180, 5272, 4635, 3618, 3176	0.2881	92	0.2151	93	0	1	5	6
FHL2	ACCCGCAAGATGGAGTACAA, ATGAAACTCTTGGTTCCAAT, CCTGTTCGCCAACACCTGCG, GAGGAGTGTGGGAAGCCCAT, GCACTTGGATGAGTACTCGT, GGAGGAGAGCCCCTACTGCG	6	2218, 3251, 1127, 3787, 5058, 1182	0.2886	93	0.2163	94	0	0	5	6
H1FOO	GCACCATGCGTAGCACCGGG, GCTTACTTTGAAGCTGCCAG, GCTTCAGCAGGTACTTGAAG, GGTGGCGGCGTCCCACCGGG, GGTGGGACGCCGCCACCCCC, GTACCTGCTGAAGCAGGCGC	6	7017, 729, 2447, 1208, 3544, 7152	0.2949	95	0.2233	96	0	1	4	6
ING2	ACGTTCCTCTGCATGTCGTG, GCAGCAGCAACTGTACTCGT, GCAGGACTACCTTGAGTGCG, GCTGCTCACCTGCTACGTGC, GGAAAATCGGGCAAGACAAA, GTCGGCCGCGCTCCTGACCG	6	3734, 838, 2681, 4786, 3646, 1210	0.2954	96	0.2242	97	0	1	6	6
PIWIL2	AAGCATTTCCCGTTTCAGAG, ACCTTCAGCACACCGTCCCG, GATGCGTCTTTATTACCACT, GCATCCGAAGGACAGATGGA, GGTTTGGTCTCCATGTTCCG, GTTCCACAGTCAGGACCAGA	6	3703, 1987, 2142, 1011, 1216, 2791	0.2969	98	0.2263	99	0	0	6	6
MIER1	ACATTACCTGGTAATTTGAC, ATCAGATGTTTATGTTTAAT, ATTGGTTTACAGACTGTCTG, CAGCTGATGGATCAAATTCA, GGACTTGAAGATTCAACAGA, TCTGTTGAATCTTCAAGTCC	6	4038, 918, 3014, 1227, 5151, 3774	0.2996	102	0.2291	103	0	1	5	6
TCEAL2	AAGGAGAAGGAAAGTCAGAG, CAGGGAGGATCAAAGACAGA, GAAGAACAGCCACCGCACGA, GAGGGAAAGCCAGAGAGAGG, GGAAAGTCAGAGATGCAGGG, TCTGGCTTTCCCTCGTGCGG	6	1234, 2152, 6473, 8085, 5233, 1083	0.3013	103	0.2308	104	0	0	3	6
TDRD12	ACATAATCTGGCTTCCACCT, CCACAAGGAAACATTCTGCC, CTATTTAGCAACTACCCAGG, GCACTGGCTTACCTTTCAGA, GCTGTTGTAGAAGTCATTCA, TGTCCTTCTTCCAATGTTAA	6	1498, 1236, 753, 3056, 1897, 3140	0.3018	104	0.2315	105	0	1	6	6
XIAP	ATGACAACTAAAGCACCGCA, CCAAATTGCAGATTTATCAA, CTGGTGAAGGAGATACCGTG, GCTGAAACAGGACTACCACT, TATCAGACACCATATACCCG, TCTTCCTTATTGATGTCTGC	6	1231, 4298, 3757, 5997, 1331, 1237	0.302	105	0.2318	106	0	0	5	6
PHF14	ACACAAAATCCAGAAGTGGT, ATAGTAGCCCTGCCAGTGAA, CAGTGGATCGCAGCTCCAAG, GCTGACTTGTTCCTCTGTAG, TCAAGGAGACAGATGCTGGA, TTACAGGCATCACAAAACCA	6	6046, 1781, 1224, 1371, 2674, 1239	0.3025	106	0.2325	107	0	0	5	6
KDM4A	ATATTTCTTCAGCATTAACG, CATCAGCTCACCTTGTCAAA, GCCGTACTCAATCCACCGAC, GCTATGGGTGGGCCTCACAG, GGACATGGTGAAGATCTCCA, GTATGTTGTACTGAGTAAAG	6	3317, 2181, 7460, 902, 4068, 1242	0.3032	107	0.2328	108	0	1	5	6
ZBTB32	AGGCCTGAAGAAACATCAGG, CGTGGTTGAGGGAAAATCCA, GCAGGTGTCAGCCAGCAGCT, GTGATACTCTGATCACCGTA, TCTCTCTCAGGATTCCTTGA, TGGTTGAGGGAAAATCCAGG	6	1245, 2920, 3963, 1917, 6605, 1199	0.304	108	0.2337	109	0	0	5	6
GMNC	CTTATTTCTGTAGAGCTGAG, GAAAGAGACCCAAGTCTCCG, TCAGCTCTACAGAAATAAGC, TCTGGCCTCCTACAAAGTAC, TCTTCCGGACTTGTGCTCAT, TTCTTCTTCCTTCTGCACCA	6	1198, 1250, 2344, 4476, 4834, 2428	0.3052	109	0.2351	110	0	0	6	6
PAPOLB	ATAGAAACCCTCAGGCCCTT, GAAGACCCCGAAGGGCCTGA, GCGCCGCCGCCGAATCGCTA, GGAGGAAGTGAAAGATTTAA, TCCTCTTCGAAGACCCCGAA, TGCTAAACTGAAACTACAGG	6	1418, 1257, 4881, 2629, 662, 2517	0.3069	110	0.2378	111	0	1	6	6
MBD4	ACGAGATTAAAAGGTGACCG, AGTCTGAGTCTGGGGGACCG, CCAAACTGAGCAGAAGCGAT, CGCTCACTAGAGGTGACGGT, TTAAAGGCTTTACGTCGTGG, TTAAGAAATGGACACCTCCT	6	3859, 1269, 5132, 3511, 1756, 591	0.3098	111	0.2409	112	0	1	5	6
VGLL1	ACTGCCATCCGGCTGCCCAA, ATAGCATGTCTCCAAATCAG, ATAGGCTTCTGTTTGCCTTT, CTACGCTGCTGATGTCCCCT, GAAGGTGTGATGCTGAAAAA, TTTGCCTTTGGGCAGCCGGA	6	1316, 1281, 1734, 1566, 881, 2050	0.3127	114	0.2437	115	0	1	6	6
MED13L	ACACTCAGCCCTCAGCCACG, ATACACCAGGACAGAAACTA, ATATGATGATGATTTCCCTG, GCAGGTTAGCTTGCAGACAG, GCTCTTCCATCCTTCCCAAG, GTAATACATCATGAACTGCA	6	1351, 1543, 3936, 764, 3691, 1282	0.313	115	0.2438	116	0	1	6	6
TYW5	ATTACCTAAGCCAAGTTGGA, CCTCCAGCCGGGGTACCGGG, CGAGAAACGCCCTCCAGCCG, GTTTCCAGAATTCTTCAAAG, TCTTCCCTCCAACTTGGCTT, TTAGAATTCTTACCTTTCTA	6	3741, 1288, 4505, 594, 3506, 3851	0.3145	116	0.2455	117	0	1	6	6
RBPMS	AAAAGCAGATAGAGCTCCCG, ACCGGGAAGATGAACAACGG, GCGGAATTTCAGGATCGAAG, TCAAAACTGACAAAACCTAC, TCCCGAGGTTTGATATCCAG, TGACAGTCGCTCAGAAGCAG	6	1298, 787, 1794, 4447, 2338, 3079	0.3169	118	0.2498	118	0	1	6	6
SMARCAD1	ATGCTTACTGGAAATGGAGG, CTGGCATACCTCTATCAGGA, GAGGTATGCCAGAAATGCAA, GTGTGCCTGTGAGCAGCAAA, TCAGCCGTCGAAACAGACTA, TCTGGCATACCTCTATCAGG	6	4985, 6705, 3479, 1307, 826, 6247	0.3191	120	0.2521	120	0	1	4	6
TFEC	ACTCACGGATCATTAGACTT, AGACACTTCAAAGTTAAAAC, AGGAATTTCACCAATTAACA, CATTCTACAGTGATATGCGC, CTTGTAAGCCCCATGTTAAT, GGAATTTCACCAATTAACAT	6	827, 3966, 1312, 7301, 1564, 3802	0.3203	122	0.2538	122	0	1	5	6
CDY2B	AATATTACTGATGACAGCAG, CAAACTCCTGGGAAGCCATG, CCTGCTGATCTGCTGCAATA, GATGTGACAAAGGGTCCCGG, GCATCTTCTTGATAAAAGGC, TCAGTTCCAAGAGTGAAAGG	6	4145, 4842, 3208, 1315, 1959, 807	0.321	123	0.2549	123	0	1	6	6
NCOA2	AGTCAGATGTATCCTCTACA, GCAGACTGCATGACAGCAAA, GCAGTCCTGCTTGATTTGCG, GCTGTCCTGGATTCATGCCA, GCTTCACCAGACCTAAAAAT, TTACCTGATTCAGAAGAGGA	6	3592, 1272, 2321, 2559, 1319, 6653	0.322	124	0.2559	124	0	0	5	6
USP16	GATGCAAGAGACCAAAAAGG, GCTAAAGTAAGAGGGCCTGG, GGAGCTGCTTCGCTACTTAT, GTATTGTAGTTCAAACCAGT, GTGCCAACATGGGAAAGAAA, TGGCAAGGAGAATTCATGGG	6	3204, 6155, 1093, 1322, 6524, 1955	0.3228	125	0.257	125	0	0	4	6
CECR2	AGACATCGTCTGCATCCAGC, GCAGCTCCACACAGCCCCCG, GCAGGGGATGAGAAAAACCT, GCTGCTGCACAGGCTCCCCG, GGTGTCCCACCACAATGCAG, GTAGAGCTGCCGTTCTCGAA	6	2096, 5978, 793, 6032, 6312, 1339	0.3269	128	0.2619	128	0	1	3	6
ARRB1	ACTCACCCACAGGGTCCACG, AGAAGCCTCTCTGGATAAGG, GAGTATCTCAAAGAGCGGAG, TGAAGTCAAAGCCTTCTGCG, TGGAGGAGAAGATCCACAAG, TGTGCGTCTGGTCATCCGGA	6	1343, 8254, 1147, 6513, 6365, 7217	0.3279	129	0.2631	129	0	0	2	6
TDRD6	AGAGTCCATACAAAGCACAA, AGGTATACCGGGGTTCCACG, GCTGACACCAGAAATAGCCA, GCTGGAGCGCTATCTCACAG, GCTGGCAATAAAATGTCCAA, TCGCTTAGCCAAACAAGCAA	6	4069, 1353, 737, 2685, 4371, 4341	0.3303	130	0.2659	130	0	1	6	6
TFPT	AGGTGCAGAGGATAACTCGG, ATGTGGCCACCAAATAGGGG, GAAGAGGAAGAGGCAGCCCG, GGAGCGAGATGAAGAGGAAG, GGAGGCTGCAGCAGGAACGG, TGAGAACTCCTCAAAGCCCA	6	7848, 2427, 6798, 1292, 8843, 1355	0.3308	131	0.2666	131	0	0	3	6
ZBTB16	AGAACCCTAGCCACCCCACG, GCAGAACCCTAGCCACCCCA, GGAGTTCCACGCCCACCGGA, TCTTCACCTCAGCCACCCCA, TCTTGAGGTACCGAGCCTTG, TGCTGGACTCGGCTGCCCCA	6	3842, 4037, 3177, 1358, 3186, 964	0.3315	132	0.2674	132	0	1	6	6
PRDM13	CTTCCTGCACCACGAACACG, GCTATTGCAGACTTACCCGG, GTACCTTTCTCGTCGTGAGT, TCACGGCGACCCCTACCGGG, TGAAAGCTGAGCGCACGCCG, TTAACCCTATCCACTCCAGA	6	1146, 2262, 3351, 4671, 6575, 1363	0.3328	134	0.2685	134	0	0	5	6
NFATC3	ACTAAGAGAAGACTCCCGGT, ACTGAAATGGAAAAACTGCA, TATGAAACTGAAGGTAGCCG, TCACCTGGTCACTCCCCCAG, TCTCCTGGTGGCTCTCCAGG, TGAAACTGAAGGTAGCCGAG	6	4739, 1958, 1364, 5183, 953, 4613	0.333	135	0.2687	135	0	1	5	6
TBX18	AGTGGCGCAGACCTGGAGCG, CCACAGTTCGAAATGGATGG, CCAGCAATATTACATTGCCA, GCTCCCTGCAGATCCACCCG, GGGATGGCCGAGAAGCGAAG, TCTCATCCAAGTCTCCCCCG	6	1178, 1373, 5258, 5498, 3397, 7863	0.3352	136	0.2723	136	0	0	3	6
HIST1H2BK	CGGCATCTCCTCTAAGGCCA, CTTCTTCTGCGCCTTAGTCA	2	4248, 3613	0.5539	401	0.2723	137	0	0	2	2
CTNNB1	AAGGTTATGCAAGGTCCCAG, CATGGAACCAGACAGAAAAG, CCACTCATACAGGACTTGGG, GCATGTTTCAGCATCTGTGA, GCCAAACGCTGGACATTAGT, TGTCTGCTCTAGTAATAAGC	6	1384, 4799, 3447, 3019, 598, 5677	0.3379	137	0.2761	138	0	1	5	6
ZMIZ2	GAGTGGACAGACTTACCAGA, GCAAGGCGTGTACAGCCGCG, GCTGAAGGCGGCGCCAACAA, GCTTGCGTGAAGTCAGTGGA, GGCATCATGGAGCTGCCAGA, TTACATGTCACCAAACCAAG	6	7227, 1803, 6669, 7084, 1390, 820	0.3394	138	0.2783	139	0	1	3	6
GLOD5	AGGCTGCCAGTCAAGATGTG, CTACGGATAAGACATGGGGG, GATCTTGGAATAAAACATGG, GGAGGGCAGATGGCGCAGCA, TCAAGTCTACGGATAAGACA, TCACGATGTGGTCAAGTCTA	6	868, 1466, 3780, 1391, 1817, 2662	0.3396	139	0.2785	140	0	1	6	6
NPM2	CAAAGAGGAGATGCATCGCG, CAGTAGCGCCAGTAGCACGG, CCAGGCCTCAGTCCTCCCCA, CCTGCCCCCAGCAAACCAGG, CTTGGGGGAGAAAGCCAAAG, GGAGGACAAGAAGATGCAGC	6	759, 2335, 4410, 1397, 7658, 2127	0.3411	142	0.2804	143	0	1	5	6
IL31RA	ACCAAACGTACAACCTCACG, CCAGTCCTAGAGAAAACACT, GAGATGTTATAGCACCAGAA, GGACAGTCAACAGTACCAGC, TACTGGAGATTAGAGAACAT, TGTCATAGCTCTGCGATGTG	6	5433, 2915, 1135, 1403, 2051, 4693	0.3425	143	0.2824	144	0	0	5	6
MBIP	ACTTCAGTCTCCGATTAAAG, ATGCAGGCTGGAATGCCGAG, CTTTCGCTCCCTACACACCC, GAGCTTAATCGCCCGAGCAG, GATTTCGTAGAGCACCTCTC, GCTCGGGCGATTAAGCTCCG	6	4551, 1413, 1349, 5698, 3688, 1577	0.345	144	0.2853	145	0	0	5	6
ALDH9A1	AGGCGTCCGCCGGCTCCACG, GCCCCGCCGCGGTAATTGAG, GCTCCACGCGGGCCCCGCCG, GCTTTACCCAAAGGAACGGG, GGAGGCTGCCAGGATAATAA, TCGCAGCCGCTCAATTACCG	6	2109, 1105, 3621, 1416, 7114, 6478	0.3457	145	0.2869	146	0	0	4	6
TDRD3	CCAAAAGGCACAAAAGGCGG, GCTTCAGTAAGGAAGCATCG, GTTATGGGTCCTCCTCTGAG, TGAATTTGAAAAGCAAAGGA, TGCCTGGTATCATTTCGAGG, TGTCCAAAAGGCACAAAAGG	6	5774, 2295, 4441, 1419, 2528, 1374	0.3464	146	0.2879	147	0	0	5	6
MED15	AGGAGGCATGCCAATTCCAG, GCTGTGAGGGGCCATCCCCG, GGAATTGGCATGCCTCCTCG, GGTTGGTTCTGAGCAACTGG, GTACTCACAAATTTCAGTGG, GTTTCAGCGAGGATGCCATG	6	2458, 1597, 2216, 906, 1424, 6006	0.3477	147	0.2897	148	0	1	5	6
WDR61	AGAGAGCTGGATGCAGCAAT, ATTCTCTTCAAACAAGAGCA, CCATTTGGTCAGTTGCTTGG, CCTGTTGAAGGCGTGATGAG, GACCTACAGTGGAGTCTGGA, GCTGGATGCAGCAATGGGCA	6	8965, 8490, 1431, 7653, 770, 8370	0.3494	148	0.2915	149	0	1	2	6
SP110	ATTTACAGAAGCTTCAAACG, GATCTCATCGCTTTGCTGGG, GTGCAGGGAGAGGCAGGACA, GTTAACATCCAAAATGAATG, GTTCACCATGACAAGAGCCA, TTACCTGGCATAGAGCCCAA	6	2806, 1303, 7571, 4640, 1434, 4949	0.3501	149	0.2926	150	0	0	5	6
GLO1	CCTCAGTTGCTGCTCCGACG, CGACGCGGACCCCAGTACCA, CTTGGTACTGGGGTCCGCGT, GCAGAACCGCAGCCCCCGTC, GTCGGAGCAGCAACTGAGGG, TCGTCCGTGAGGCCGCCGGA	6	2259, 1440, 4368, 2689, 5801, 618	0.3516	150	0.2944	151	0	1	5	6
PHF7	AGACTAGGAGGGTAACCCAG, CTGCCTTGTGGCCAAGAAAG, GCTATGCCTTCGAGAACCTG, TCTAGTAAGCTGCCTCAGAG, TCTGCCTTGTGGCCAAGAAA, TGGGGATCCCGAAAAATTAG	6	1748, 530, 2808, 4130, 4519, 1450	0.354	151	0.2966	152	0	1	6	6
JMJD1C	AATCCTACAGAAAATCCTAA, ACAGAGTAATGCCCTTGCAG, AGATGAAGAGAAGATGAAGG, CCTGCCTTCTCATTATTATG, TGGCATGTGGAGAAAAGCAG, TGGTGTGGACCACTAGTCAG	6	1104, 7236, 6718, 1455, 1890, 5018	0.3552	152	0.298	153	0	0	3	6
DNAJC1	AGGATGATGAACGAAGGCAG, ATTTGCTTCCATGCAAACTG, CAACTTCTACCAGTTCCTCG, GATTGCTGATGAAACCACAG, GGAGTTGTTTGACTTAGTGG, TGCTTACCTGCTGCACCCCG	6	3836, 5769, 835, 2545, 3055, 1461	0.3567	153	0.2996	154	0	1	5	6
SLC22A8	AGGCCCTGAAGATACTCCGG, CATTGAAGACAGCCACCCGC, CTGCAGCTCACTCAAGATGA, TGCCAAAGCCACACAGGAAG, TGGCAGGTATACTGATTGGA, TTTGGCCAGTTCATTCTGCC	6	4713, 4875, 1463, 725, 4127, 2146	0.3572	154	0.3002	155	0	1	6	6
KAT2B	ACCTGTGTGGTTTCGTACCG, CCCTTGAGCAGCCAAACGCA, GCAGGCGCCCGAGCCCCCGG, GCGAGCGCGTACCTTGCAGG, GCTCCTGCCCCGCAGCCGCC, TCAGTCTAACAGAATCCTGT	6	2534, 1465, 6299, 1080, 2009, 1802	0.3577	155	0.3009	156	0	0	5	6
PYGO1	CGATTAAAACCCATGCCCAG, CTCCAAAGCCAGGATAACCA, GAGCATACTCAGACAATGGA, GGAGCTGGAGAGTTCTCGGC, TATGGATTTGACGAAGGTAG, TATGGGGAAGACATTCTTGG	6	3760, 1467, 4617, 7526, 4522, 717	0.3582	156	0.3016	157	0	1	5	6
FLT1	CTAAGTAATTTGACTGGGCG, GGTCAGCTACTGGGACACCG, GGTGTCCCAGTAGCTGACCA, TCAGGGATCAAAGTGTCAAG, TGGTGAGTAAGGAAAGCGAA, TTAGGTGACGTAACCCGGCA	6	2110, 1468, 2242, 514, 5033, 3962	0.3584	157	0.3021	158	0	1	5	6
SIRT7	CACAGGCGCGGGAATCAGCA, GACCTGGTAACGGAGCTGCA, GAGCCGCTCCGAGCGCAAAG, GCAGGTGTGCGACGACCCGG, GCGCATCCTGAGGAAGGCGG, GCGTCTATCCCAGACTACCG	6	2004, 2105, 845, 4927, 4366, 1471	0.3591	158	0.3031	159	0	1	6	6
PARP3	AGAGAAGCGCATAATCCGCG, GAGGGCCCTGAGAAGAAGAA, GGAGGCCCTGAAAGGCCCCA, GTGGACATGTTGGATCCACG, GTTAGTGATGAGCTTCTGCG, TGCTTGCTCAGCTTTCCCAG	6	3338, 3166, 1148, 4430, 1475, 5199	0.3601	159	0.3043	160	0	0	5	6
PRKD1	AGATCCAGACCCAGACCACG, CCACATCAGACTCTGCCCCA, CTGAAAGTCTTCAAAGGTGG, GATGGTGCTGACCCCAGTGA, GCACAGTCATGAAAGAAGGA, GCTGCTGCAGGACTCGTCCG	6	1961, 2890, 1324, 6128, 3315, 1490	0.3638	163	0.3093	164	0	0	5	6
TBL1X	AAATCCATCGAAGAACAGAG, ACCCTGACATCCTTACCCGG, CAGGATGGCACAGTGTTCGA, GGCCGAGATCAGTATCAACG, GTTCTCTTCCCCATTCACCG, TCAGCAGCAAGCCAGTGCGG	6	1037, 5458, 4016, 1497, 3394, 2952	0.3655	164	0.3115	165	0	0	5	6
SIRT1	ATAGCCTTGTCAGATAAGGA, ATGAATTTGTGACAGAGAGA, GCTGGGCACCTAGGACATCG, GGGAAGACCCAATAACAATG, GTTGACTGTGAAGCTGTACG, TCTGGTTTCATGATAGCAAG	6	3237, 1499, 5657, 2794, 4924, 1365	0.366	165	0.3117	166	0	0	5	6
ZHX1	ATTGCATTCGACACAAACAT, TCTACAGGTGTAAGCACAGG, TCTTGCCTCCTCTACTTCCT, TGCTCAAGCAAAATATACAG, TGGTGTTAGTTGGACTCCCG, TTCCTACACACATTTCCACA	6	1500, 2317, 1691, 973, 4312, 3822	0.3662	166	0.3121	167	0	1	6	6
AFF4	ATTGTGATAAGACAATGCCG, CGGAATCAGGAAATTCAGCA, GCACTTCTCAGTCTCAGAAA, GCAGCTGCTGAAGAGCCTCG, TCTATCTTCAGGCCTCCACG, TGAAGGAGCAGATAACTCCA	6	1501, 4015, 1750, 8813, 536, 3319	0.3665	167	0.3123	168	0	1	5	6
SLC22A6	GCTTCTGTGCCATTGAGAAA, GGCAGCAGTGAAGTTCTGCA, GGCTGCCCCTGCCTGTCCCG, GTTCTTGCTGAGGTTGGCAT, GTTGTCATAGATCCAGCCAT, TCAAGATGAGTACCTTCCGG	6	4611, 1505, 3150, 648, 3430, 3870	0.3674	168	0.3135	169	0	1	6	6
MXD1	ACAGAGATGCCTTAAAACGG, CCCCCGGTGCAGAATGGCGG, CGACTTGATTCGGGTCCAAG, CTCCCGCCGCTCCAGATAGT, GTTATTGTATGGTAACATGG, TTGTGCCTGGAGAAGTTGAA	6	1510, 991, 6600, 2957, 1873, 2632	0.3687	170	0.3149	171	0	1	5	6
TCEAL4	AGTGAGGGAGAGGCAAAAGA, CAGAGAGTGAAGGAGAGCCA, GAGGGAAAACCAGAGATAGA, GAGGGAAAGACAGAAAACAA, GAGGGAGGATCAGAGAGAGA, GGAGAGTCAGAGATGGAGGG	6	2682, 5159, 1444, 1515, 9066, 7795	0.3699	171	0.3161	172	0	0	3	6
MAPK8	AGAATCAGACTCATGCCAAG, ATTCTGCTGGAATTATTCAT, CAGCATCTGATAGAGAAGGT, CCTTGAGCTCCTGAGCCTAT, GCATGAGTCTGATTCTGAAA, TATCAGAATTTAAAACCTAT	6	3835, 811, 3980, 3905, 3226, 1519	0.3708	172	0.3169	173	0	1	6	6
MINA	CATAGTATGTGGCCAGTGCA, CCTGGCACGAGAGTACAGCG, GTGGAGGCCGAGGAAAGGAT, TCATCTCTCTGAATGAGAAG, TCGACATCATCATAATGGGG, TCTTCCTTCCCACTCCCTGT	6	1521, 1188, 6964, 3072, 6023, 6392	0.3713	173	0.3176	174	0	0	3	6
HMGN4	AGCCACAGAGGAGATCAGCT, AGGTGAAGGATGAGCCACAG, AGGTGATAAAGCAAAGGTGA, ATGCCCAAGAGAAAGGCAAA, TGCTAAAGGTGATAAAGCAA, TGCTACCATGCCCAAGAGAA	6	986, 5379, 5046, 2826, 3367, 1523	0.3718	174	0.3178	175	0	1	4	6
SRA1	CCACTTCCGCTTGGCCAGCG, CCGCCATCTCCACTTCCGCT, GCGCTCGCTGCTTACCAAGA, GGAGCCTTACTTGAAGGAGG, GGCGCTCGCTGCTTACCAAG, TCCGCAGGCAACAAGGAACG	6	3007, 1909, 2742, 4853, 1530, 740	0.3735	176	0.3196	177	0	1	6	6
RING1	ACTGCATTGTCACAGCCCTA, CAGAGATTGCTGTTTCCCCT, CCAGAATGCCAGCAAAACGT, CTCCTATTACCCGCTCCGTA, GAGAATGCCTGTCACCTGCG, TAAGATCTATCCTAGCCGGG	6	1456, 2840, 6119, 2084, 1532, 2092	0.374	177	0.3201	178	0	0	5	6
HMGXB4	AGAGCTTTCTGAAAACAGCC, ATAGCTGTATCAGTAGACTG, ATTCTGTCACCAAAGGAGAA, CAAGCCCTCCAAAAAGACTG, CACGGAGTCATCATAAGCCA, TAAACCATCAGGCTCCCGAA	6	1535, 2967, 1666, 1912, 2493, 624	0.3748	178	0.3212	179	0	1	6	6
MBD2	AGGCCGCTGCCGCCACTCGG, CCTGCGCACGCCGCTCACCG, CTTTCCCGTCGGGGAGCGCG, GCGACTCCGCCATAGAGCAG, GCTTCCACCGCCCCCGGCCA, GGAGCCGGTCCCTTTCCCGT	6	541, 1537, 1847, 5327, 4002, 6479	0.3752	179	0.3219	180	0	1	4	6
YBX2	ACTAATGTAACTGGGCCTGG, GCAGGGGAGCCGCAGAAAGG, GGAGCCGCAGAAAGGCGGCG, GGGGGCTACAGCGGTCCCCG, TCGCGGGCACCGTCGCCGCG, TGAATCGGCGGGACTTACGT	6	2480, 8397, 1544, 1252, 2044, 4590	0.377	181	0.3238	182	0	0	5	6
EYA4	ACTCAGTCCCCATTACAGAG, CCAGCCATCAAGACAGAGAG, GCTGCCTCAGTTACAGCCCA, GCTGGTGTAGAAAGAATGTG, GTTACTACAAATGGGACAGG, TGATAAGTAGAGGTTGAAGA	6	2255, 1546, 4864, 5294, 3653, 1392	0.3774	182	0.3248	183	0	0	5	6
KDM5D	CCCCTTCCTGAAATCCCCAG, CTATTGTGTCTTCTCCCACG, GCTGAATTCCAAGACCCGCT, GCTTATCATCTTCATCCCCA, GTGAAGGATGAGCAAAGTGG, TAAAGATTCCCAATGTGGAG	6	3672, 928, 4578, 1547, 1562, 2147	0.3777	183	0.3252	184	0	1	6	6
MSC	ACCCGGTCCCCGCCTCCAAG, CGTAGCTGCGCTCTACGCCG, CTCGCCCAGTGACAACTCGT, GCAGAGGAGGAGGACCCCGA, TCTGCCGACGAGTTGTCACT, TCTGGGCACAGCCGGCAGCG	6	1548, 3120, 2750, 6252, 4681, 1068	0.3779	184	0.3255	185	0	0	5	6
UBE2B	CATGAGCCTCCTCCGGGCCG, CTGAAAACAACATCATGCAG, CTGGATTTCCAGGTTACAAG, GCATGTCGACCCCGGCCCGG, GGCTCATGCGGGATTTCAAG, TTACAAGAGGACCCACCTGT	6	3736, 1749, 1752, 1120, 1554, 4284	0.3794	185	0.3274	186	0	0	6	6
MPHOSPH8	AGTGTCCTCAGCCTTTCTCG, GCAGGTTGCGGAGGGAGCAA, GGAGCCCGAGATTCACCTGG, GTATCTGCCCAAACGCCAAA, TCGCTGGAAAGGCTATACAT, TCTGAAAAAGAAAAAAGCAA	6	4390, 5919, 6808, 1099, 7647, 1558	0.3804	186	0.3286	187	0	0	3	6
RBP2	ACGTACTGCAATCTTGCGGG, AGTGGCCACCACCATGACAA, ATAGTTGCGGAATGTGCTAG, ATTCTGGTCCCTTGTCATGG, GAGAGTAATGAAAACTTTGA, TGAAATCCACATCATAGTTG	6	3848, 1336, 6156, 4191, 1579, 4825	0.3855	190	0.3346	191	0	0	5	6
PHYH	AAGTGAGAAGATGATCACGA, CAGATACTGCACTCTCCCCG, GAGCACATCAGCCGGAACAA, GTGCTCCCAGGCACACACAA, TCTCATCGTTTGCGCCTGGA, TTACAATTACCAGAATCTGG	6	3881, 1531, 2819, 3332, 1581, 4196	0.386	191	0.335	192	0	0	6	6
MYOCD	AGTCAGATGCGGGGAAGCAG, CCAGCCACCAGTCAGATGCG, GCCTGTGTCAGGCACCAAAA, GGTGAGTTTCTCCAAATCCA, GTACATTCCCCCAGACCAGA, TGAAGACCCCCAAAACTCAG	6	5098, 5831, 914, 3811, 1585, 2645	0.387	192	0.3365	193	0	1	4	6
SETMAR	GGACCACTCTGTTTCTGCAG, GGCCAGGAAAACTTGCCGGT, GTGCGGCCAGGAAAACTTGC, TCACAGACAAACCTTCCTTT, TGACCACTGCAGAAACAGAG, TTAAACTCCGCCATCCCACA	6	1588, 2879, 5200, 1233, 3183, 3381	0.3877	193	0.3377	194	0	0	5	6
SMARCC2	ATGTTGTGTATCCTGTCCCG, CCCCAACGTGAAGTACTACG, CGTGAAGTACTACGAGGCCG, GCAGTGTTCATGCCATTGAG, GCTCTCCCCGAGTTCTTCAA, TGACCCAGTTCGACAACGTG	6	3059, 1314, 1596, 2015, 4426, 6028	0.3896	194	0.3394	196	0	0	5	6
ELANE	CACAATCTCCGAGGCCAGCG, CACATTCGCCACGCAGTGCG, CCAGGACCACCCGCACCGCG, CCCCGGCAGAAACGTCCGCG, GAGCCCATAACCTCTCGCGG, TGTCGTTGAGCAAGTTTACG	6	2189, 3632, 3066, 1153, 1600, 5891	0.3906	195	0.3406	197	0	0	5	6
SLC22A13	ACATGGGCAAAAAAGTAGAA, GCTCCCATCCCTGAAGAATG, GCTGAAGCTAAGTCCAGCGA, GGAAGTTGAGAACACACAGC, GGTGCTTCCGATCACAAACC, TCACCCAAGCCACTGCACAG	6	2406, 612, 1604, 2234, 4421, 5531	0.3916	197	0.3413	199	0	1	5	6
HMGN3	ACGGTCTGCCAGATTGTCAG, ATCCAAAGTAACTAAACAGG, CTAGTCTCCAGAGAATACAG, GTAAGACTTACCTTTCTCTT, TAGTCTCCAGAGAATACAGA, TCCCTTTGTAGCCCACAAGA	6	798, 2048, 4806, 2266, 3908, 1605	0.3918	198	0.3416	200	0	1	6	6
CAMK2D	AGATCCTTATGGAAAGCCAG, CATGATAGCATATCAGAAGA, GCTTAGCCATAGAAGTTCAA, GTGTTGGTCTTCATCCCAGA, TATCTTCCCAGAGTTACTGG, TGTTGGTCTTCATCCCAGAA	6	1026, 1612, 4215, 4837, 3806, 2123	0.3936	199	0.3443	201	0	0	6	6
TWIST1	CGACAGCCTGAGCAACAGCG, CGTCCCCCGCGCTTGCCGCT, GACCGGCAGCAGCCGCCGAG, GCAAGCGCGGGGGACGCAAG, GCGCAGCAGCAGGCGCAGCG, GCTGTTGCTCAGGCTGTCGT	6	4046, 2305, 1615, 2566, 1176, 2777	0.3943	200	0.3455	202	0	0	6	6
H2AFY2	AATTGGCCGGCAATGCCGCG, GCAGGTGTCATCTTTCCAGT, GCTGGCAGTTGCCAATGACG, GGGCGCCCCTGTCTACATGG, GTTCAAGTACCGGATCAGCG, TTACCGACAGTCCAAACCAA	6	5420, 3932, 1810, 1618, 6866, 1066	0.395	201	0.3464	203	0	0	4	6
ADI1	ACGACGCCCCGGGCGACCCG, AGGAGTAGTTCCTCTCTCTT, CCAGGCCCACTGGGCGGCCG, CTAGATTAAGATGTTCTACG, GCTCGGGGTGCTCTACTGGA, GCTGCTCCAGGCCCACTGGG	6	6736, 1619, 4157, 1277, 4235, 6133	0.3953	202	0.3467	204	0	0	4	6
IDO2	ACCATCATCTCATTTCCTGG, CTGAGTGGACCAGGATAGGA, GCTGAGCTGCCAGTTCCTGA, GGAGACTTCGACAAATGGAA, TATCTTGCAGCCCAACCAGG, TTCCTGCCAGACATAACCCA	6	1622, 2494, 3951, 3067, 886, 2834	0.396	204	0.3477	206	0	1	6	6
MAZ	AACTCCTTCCCGCCACCTCA, GCAGCGTGCAAGGAAACACC, GCTCAGCCCCGACCTGCAGG, GCTGGGCCTGGACTCCCGGG, GGGAGTCCAGGCCCAGCACG, TGCTGGGCCTGGACTCCCGG	6	2201, 1540, 1623, 6516, 2587, 7634	0.3962	205	0.3479	207	0	0	4	6
UPF3B	AAGAAAAGAGAGAAGAAAGG, ATTACCTCCCACTTTGACCA, CATCAACTTTAAAAACCAAG, GAGCTTCCTGAAAAACAAGC, GCTGCCTGTGGCCCCGGCGG, GTAACCCTGTTAACCCCCGC	6	8263, 6078, 1438, 1635, 6872, 4078	0.3992	207	0.3511	209	0	0	3	6
SETDB2	AAGGAGTCTACGAAACGTGG, ATTCCGAGCCAACTGAACAT, CATTCACTAGAATCATTGCT, GATTCCTGTGACTGCTCTGA, TTAAGTACAGAAAGACTGTG, TTTCGTAGACTCCTTCCACA	6	2885, 4804, 4193, 1643, 5414, 503	0.4011	209	0.3541	210	0	1	5	6
NAP1L5	GAGGAGGTAATGGCGGAAGG, GCCTGCGGAGCCTAGCCAGG, GGCTGGTGACCCTGACAGCG, GGGTGGAGACTGTGACAGCG, TGCGGAGCCTAGCCAGGCGG, TGGCCGACTCGGAAAACCAG	6	2025, 823, 4051, 1648, 2631, 5328	0.4023	210	0.3555	211	0	1	5	6
NAP1L3	AAACCCTAAAGAAAACCCAG, ACAAGCCTCTGTATGATAGG, AGAATGTGAATGGAATTCAG, CCGCTTGTATAGAAAGAAGA, CTAAGGGAGGCATTTCACTA, TGAAACCGCCTATCATACAG	6	1663, 2937, 4177, 1655, 4048, 2729	0.406	211	0.36	212	0	0	6	6
CHD9	ACAGAAATAATCTCAACCCA, ATAGATATAGAGGCCATCAG, CATCCCCAAAACCAACCCAA, CCATCTTCCAAGAAGAGCGA, GAATTGCTATAATTACCCTG, GCAGAGTCAGAGGAAATCTT	6	3209, 1238, 3406, 5524, 5571, 1664	0.4062	212	0.3603	213	0	0	4	6
SND1	ATAGAAAACAAGACTCCCCA, CTTTGCATCAGGTTGTGTGG, GCAGAATCACTGGTTGCAGA, GTAGTAATCTGGGAGGAGCA, TCAGGAGGAGGCCCACCACG, TCTCATGCCTTCTCTCCGGG	6	984, 1672, 3130, 4599, 3213, 4581	0.4082	213	0.3629	214	0	1	6	6
HMGA2	CCCTCTCCTAAGAGACCCAG, CCTCACAATTAGGAACCAAC, GCCCCAGCGCCTCAGAAGAG, GCCCTCTCCTAAGAGACCCA, GCGCCTCAGAAGAGAGGACG, TTAGGAGAGGGCTCACCGGT	6	1676, 1651, 5201, 4189, 3106, 6386	0.4092	214	0.3647	215	0	0	4	6
PLOD3	ACACGGCCAGAAACACCCGG, GATCTTTCAGAACCTCAACG, GCTTCTGCTGGCCCGAGTGG, GGAGAAATACGCTGACCGGG, TCAGCCTCCGACCGGCCCCG, TGGCCACAGCTGAAACCGAG	6	1677, 3810, 7736, 1154, 2603, 4609	0.4094	215	0.3652	216	0	0	5	6
AIRE	AGCCATCCTGGACTTCTGGA, CCAGCAGCCCTGACTCCAAG, CGGCCACCGCGATCTCCGTG, CTTCATCTGAAGGAAAAGGA, GCACCGCACGGAGATCGCGG, GCTTCTGAGGCTGCACCGCA	6	2552, 2586, 705, 1678, 7261, 2426	0.4097	216	0.3654	217	0	1	5	6
BCAT1	AGTGCAAAGCTGATGAGCCA, CTTTGTACTCTTGAGCCCAG, GCTCAAGAGTACAAAGAGCA, GTTCACGGATCATATGCTGA, TTTCTCCCATCCAAACTCTG, TTTGTACTCTTGAGCCCAGT	6	3078, 5778, 1680, 6370, 1516, 4937	0.4102	217	0.366	218	0	0	4	6
PIAS2	AATGCAGCGCCCTCATCAGG, CCGCGGGTGGTATAAAATGG, GCGCTGCATTTATTGAAGAG, GTATAATCTCTCCTACCACC, TGAAGCAGCACAGAACCAAC, TGTAGAACCTGACTTGGCCG	6	5789, 2172, 2167, 1682, 1616, 3395	0.4106	218	0.3665	219	0	0	5	6
GPT2	ACAAGCCTGCAGGATCCGCC, AGAGCACCTTAGGATCACAG, ATGCTAAGAAACGTGCCCGG, GCAGACCTGTGGGGTTCCCA, GGCTGCCTACATCACCAGGA, GGTGAATTACTACCTGGACG	6	1608, 1684, 4601, 5662, 4810, 6237	0.4111	219	0.3672	220	0	0	4	6
RPS6KA4	CCAGCGCCAGTACTTCAAGG, CGACGATGAGAGCTGCGCCG, GCACGAGGAGAAGGTGAGCG, GCTGAGCAAGGAGTTCCTGA, GCTGCACTACGCTTTCCAGA, TCTCTTTGACCACAACAACG	6	2907, 1685, 5952, 633, 2739, 2992	0.4114	220	0.3675	221	0	1	5	6
HIPK2	AAGTGTGTCATGGTGACAAA, ACAGGTCAATGAACTCCCGC, ACTGCCACCTCCAAAAACAG, GCATTATTCTGAATCATGGG, GTTATTGCAGAATTGTTCCT, TTAGGTTGTGTGGTCCGCCG	6	2145, 7467, 2132, 4199, 1445, 1688	0.4121	221	0.3681	222	0	0	5	6
TOP2B	ATGCTGCTGACAATAAACAG, GTATTCCTGAATTTGACGAA, GTGTACACTGATATTAACAG, TGCTGCTGACAATAAACAGA, TGTAGGAATGAATTGCAGGG, TTAGTCTGAGAATCAAAAGT	6	4760, 1694, 5889, 3321, 879, 3083	0.4136	223	0.3701	224	0	1	5	6
SIRT4	ATGCTTTGCACACCAAGGCG, CGTGCTCGAAAGCCTCCATT, GAGACTCCTTGTGATGACTG, GGAGTGCCCCAATCCGCCAG, GGCTGGGGTTTGCGATCCAA, TGCTGGCACAAATAACCCAA	6	4478, 4650, 1698, 767, 2848, 5781	0.4146	226	0.3715	227	0	1	5	6
BAZ2B	CCAGTGAATTGAGATCCAAA, GAAGGTGTCGAAGATGAAGT, GACACTGTGGACAGGTTAAA, GCTAAGTGAAGCAACTCCAG, GCTGGGGGAGCAAATAGTGG, TCTTTAGTGGAACAATTCAG	6	1699, 3082, 3276, 3320, 3361, 1673	0.4148	227	0.3719	228	0	0	6	6
PARP1	CCATGATTGAGAAACTCGGG, CGATGCCTATTACTGCACTG, GCAGAAAGTCAAGAAGACAG, GCATTCCTCGCAGGGAAGGA, GCGCTCTCCAAAAAAAGCAA, GTTCACAGCAGCAGGAGCCG	6	8157, 1375, 4758, 1701, 6104, 6927	0.4153	228	0.3726	229	0	0	3	6
SKI	CCTTCACGTCGTCCAGGCAG, CGAAGCACTCGTGGTACACG, CTCGCTGCAGCAGATCAACG, GCTGTTTCCAGCCGCACCCG, GGTGCGGCTGGAAACAGCCG, TGACTTTGAGGATCTCCAGC	6	1875, 5129, 1157, 1711, 4524, 4957	0.4177	230	0.3757	231	0	0	5	6
MAP3K7	AGGGGCTTCGATCATCTCAC, GCAGCAGTATAATATGGCAA, GCTTACTGCTGGTTGCAGGG, GGGCCACCAATCTCATCAAA, GTAAACACCAACTCATTGCG, TTTGGGAAGTGATAACGCGT	6	4745, 1195, 5212, 2296, 1714, 6118	0.4185	231	0.3767	232	0	0	4	6
CRYM	CGAGGACCGCGGCATCACCT, CTCTCCTTGTAGCTACCTGG, GGTGCCGGTGACCAAGCACA, GTAGAAGGTGACCAACTTGG, GTCACCTTCTACGAGGACCG, GTGCTTGGTCACCGGCACCA	6	3417, 1209, 4796, 3497, 1724, 2230	0.4209	233	0.3792	234	0	0	6	6
PHC3	AGACCATCTACATCTCCCAC, GAGTACTTCCCCTACCCTAA, GCTTCCCCTGTTGTACACAT, GGAGACACTGTTAAAGGAGA, GGAGAGCTGATGACACAAGA, GTCTTACCTGAACAGCAGCA	6	3391, 4353, 5535, 1590, 1726, 2678	0.4214	234	0.3804	235	0	0	5	6
THUMPD2	CGCACCTCTCGCATTACGAA, CGGAGGCGCGTGGAGAGCCA, CTTACAGAAGAAATAATAAG, GCCGCCATGTCGGAGGCGCG, GCGAGGCCAACTCACCTGCG, GGAGCCGTTCGTAATGCGAG	6	1827, 5008, 3207, 5276, 988, 1736	0.4238	235	0.3831	236	0	1	4	6
MAPK11	CCTCCCGCAGTACATCCACT, GCAGAACGTACCGGGAGCTG, GCTGAAGTCCTCGATGGACG, GCTTCTGGACGTCTTCACGC, GGTGGATGATCCCGGCCGAG, TCTGCCCCGCCCCTACCAGA	6	2584, 947, 4328, 5732, 4895, 1740	0.4248	236	0.3842	237	0	1	5	6
L3MBTL4	AAAGAGCGTTTGGATCAGGA, AGAACTCTGATAGCACCCCA, ATAATTACCGTGACTCAAAG, ATATTTGGCAGAAAACCATG, CATGAACTGCACATCCCTAA, CATTGATCCCCGACATCCAT	6	3335, 1742, 4110, 2485, 1902, 849	0.4253	237	0.3846	238	0	1	6	6
KMT2A	CCACTTCTAGGTCTCCCACG, CTAGTCCTCGAAAACCTCGT, GACATTTCAGAGTTACCAAA, GAGAGCCTGGGGTAAACCAA, GGATCATTAAGACCCCTCGG, GGTGGGCCCGGGCTTCGACG	6	3327, 6242, 1738, 2884, 1743, 7516	0.4255	238	0.3847	239	0	0	4	6
NIT2	AATGTGGAGAAACTATCACC, CGCTTGTAGCTTCATCCGGG, CTATCCCTGAAGAGGATGCT, GAAGCTGGATGAGGGCCAAG, GAAGCTTTCTGAAGTAGCAA, TTTGTTCTCAGCTTTCCGCT	6	4014, 3444, 1753, 5956, 2573, 1653	0.428	239	0.3882	240	0	0	5	6
KAT6B	ACAACCCAGCCTTTCAGCAG, ATATTCCTGTGGGTAAGGCG, ATGCGGTCAGTACTTCCCAT, TCTTCATCTGAGTTGTCAAA, TGTCAACTAGAGCTAACAGT, TTTGTACTAAAGAAGAAAAG	6	2518, 1058, 1757, 2658, 4017, 2187	0.429	240	0.3893	241	0	0	6	6
TANC2	AGACCTCAGCAATCACCCAG, CCAAATTTCTCTGTGATCCG, CCTGCTACTGAATTTGGCCG, GCTGCTGCAGCATATCCCAG, GCTTGATTAGGAACATGGAG, TCTGTCTCATCCTTGTACCA	6	1758, 3671, 4644, 5037, 1309, 6175	0.4292	241	0.3896	242	0	0	4	6
POLR1D	AATAGAAGAACTGCTTAAGG, CAAAGAACTTACCAACCCAT, CTGCTTAAGGAGGCAAAACG, GCAAGAGGACACTTCATCCT, GCTGAAACAATGGGACCCAT, TGGTCTTGCTCTTTATGAGA	6	4397, 6001, 1767, 2498, 3686, 1213	0.4314	243	0.3927	244	0	0	5	6
ELL2	AGAAAGAATGACCCAGGCAG, CCAGTTCCAAGGACTCCACG, CGAGACTTACCAGAGCCACA, GATACAGTGAAATAGACAGA, GCAGCAGCACCATCTCTCAG, GCTATGGGCTGTCGTGCGGA	6	4026, 4336, 1125, 5969, 3037, 1772	0.4326	244	0.3946	245	0	0	5	6
BRD8	ATAGATTCTGCCTCCCCAGG, GCACTGGCCCCACAGAGCCA, GCTACAGATGCTGCATACCA, GTAACTTACCTGATGCAGCA, TCAAGAGCTCTGACAGCAGA, TCTAAGGGTGCAGAGCCTGG	6	2788, 6885, 7333, 2484, 1106, 1778	0.4341	245	0.3958	246	0	0	4	6
N4BP2L2	AGAAAAAGAAACGTAATGAA, ATAACATCTGGTCTATTACC, CCAGGCATCTCATCATGCAA, CTAAATGGTATAAATGACAG, GTGACCATCATTGATGTCAG, TCGTCTGCGGATACTAATGG	6	4486, 1493, 5590, 3518, 1787, 3895	0.4363	247	0.3979	248	0	0	5	6
POLR3GL	AAGAGCTACGAGGAGCCATG, CCAGTTGACCTTCAACGTGG, CTGAGGGCAAAGGTACTGGG, GCACTGAAGCAAGAGCTACG, GGGCCAGTTGACCTTCAACG, TATTCCCCTTCCTCGCCTGA	6	4938, 987, 5059, 1797, 3769, 3125	0.4387	250	0.4013	251	0	1	5	6
RYBP	ACCAGCTGAGAATTGATCCG, CCACCCACCCACCCTTTCCG, CGAAACCTGCCGCAGACGAA, GAGACAGCAAAACACAGACG, GGATAGCCTCGCACACCAGG, GGATTCCTGCGAAATTACGA	6	1798, 3302, 2928, 1569, 4458, 4686	0.439	251	0.4017	252	0	0	6	6
SLC22A25	AGACCAGTGCATCCTCCAGT, AGATGAATGAGCTTCCACTG, ATTCGCATACCAGATCCCAC, CTATCCCTGACAATGACCCT, GACCTCCTAGATCAAGTTGG, TGGGATGGAGATTCTCAGGA	6	932, 4322, 4542, 5298, 2440, 1799	0.4392	252	0.4021	253	0	1	5	6
AIP	AGTGCCGCTGGCCCTCCAGG, CCAGCCCCTCATCTTCCACA, CGTGTGATACAGGAAGGCCG, GGTCCTGCTGGTACGTGCCA, TATCATCGCAAGACTCCGGG, TCACCTTCAGCATCTCCATG	6	2154, 4893, 1768, 1801, 3058, 5615	0.4397	253	0.403	254	0	0	5	6
SFMBT2	ACAGACTTCGACCAGTTGGT, ATAGGGCCTTTCCCTCGCAG, CAATACATACACCTTCCAGG, GACGCAGGAGAGATGTAAAA, TCTGCGCTACTGCGGTTACG, TCTGTGTGCACCACCCCACG	6	2636, 5689, 4091, 1804, 853, 7175	0.4404	254	0.4042	255	0	1	4	6
MBD3L1	AGCCAGGCTTTGATTTGCAT, GGTCAGATACCATCAATGGG, GTGTAACTGGACATTCTCAA, TGATGGCCAAGAGTTCACAG, TGGTATCTGACCTCATTGCC, TGTCCAGTTACACATTCAAG	6	1809, 2995, 1304, 2744, 5798, 3062	0.4417	255	0.4056	256	0	0	5	6
MAML1	AGAACTCCGCGAATAACCAG, CGATCAACAGAATGGCTACG, CTGTTGATCGCCATTCTGAG, GCATAAGAAGACTCGCCGGG, GTGTGAATAAGAGTTCCCCT, GTTAGGCTCTCCACAAGTGA	6	6154, 2411, 2927, 695, 4992, 1818	0.4438	256	0.4085	257	0	1	5	6
TSPYL2	GCAGAGAGAGAAATGCCGAG, GCAGCGCCCGAGGCTCCAGG, GGAAAATGTCTTCATCACGT, GGGATTCTACCATCGAGTCG, GGGTTGAGTGAGACACCAGC, GGTACTGCCACTTACCTGAG	6	4039, 4890, 4912, 1325, 4019, 1819	0.4441	257	0.4088	258	0	0	6	6
ASZ1	AGGCGAGAGTAGCGAGAGCG, CCTACTTACAGGCTTTAACG, CTACTTACAGGCTTTAACGT, GCTAATGCAAGCTTTGAGAA, GTAGATTCCAACTTTCAGTA, TGGAGCAGAAGTTAATACCC	6	2390, 1446, 6510, 1840, 2237, 1830	0.4468	259	0.4125	260	0	0	5	6
CCBL1	CCCACCACCAGACTTTGCCG, GCATCTGCAGGTGTTCTCCA, GGCTCGTAGCAGTCAAAAAA, GGGTCCGTTCCCACATGCCA, TCACTGATGAAGTCTACCAG, TGTGTTTGTGTCCCTGAAGC	6	5187, 3198, 874, 6284, 1831, 4066	0.447	260	0.4128	261	0	1	4	6
NAP1L4	AGTCGTCACAGAAAAAGCAG, ATACCAGCCTCTCTTTGACA, GCAGCTTCCACGGAATCTGA, GCTGAAGAGCCAGATCCCAA, TAGAGAAGAGAATTTATCAC, TGGGGTTCCTTCAGATTCCG	6	1133, 3626, 1838, 3324, 5829, 2761	0.4487	263	0.4153	264	0	0	5	6
IDO1	AGTTCTGGGATGCATCACCA, GAGAAAATCTCCAAACCTTA, GATACTTACTCATAAGTCAG, GCTTCGAGAAAGAGTTGAGA, TCTGCATAAACCAAAATAGG, TTTGCCCCACACATATGCCA	6	1839, 2975, 2168, 3665, 1059, 3679	0.449	264	0.4155	265	0	0	6	6
ATF2	AGTTACATGTGAATTCTGCC, ATAGGCAATACAAGGACCTG, ATGACACTGTCATTACGTGC, CCAGGCGCAGTACATAGAAA, GACAGCCAAATGATCCTCGT, GTTTGATTATAGGCAATACA	6	2956, 2470, 5169, 1321, 1845, 2043	0.4504	265	0.4173	266	0	0	5	6
HMG20B	CTGCAGCCGGTGAAGAAACG, GCAGATCCGCACGCGCCACC, GCGCGGCGAGGGTCCACGCG, GGATCAGTGCACTCACGCGG, GTGACTGTCAAGCAAGAGCG, TGAAGCCTATAAGATGTGCA	6	5118, 1792, 2671, 3603, 4556, 1849	0.4514	266	0.4187	267	0	0	5	6
USP11	AGAGCTGCCCAACATCCAGA, CATGGCAAAACCACAAACGG, GAGCCCCCCAAACAGTCGCG, GCACTGGTATAAGCAGTGGG, GCGTGGACTTGAAGAGGCCG, GCGTTGGCTGTAGAAGAGAA	6	6010, 5062, 1855, 1926, 6721, 692	0.4529	267	0.4202	268	0	1	3	6
SS18L1	ACTCAGAGCGGCTCCAGCCA, ATCCTGGAGTACCAGAGCAA, CCTGGAGCCCTGACTCAGAG, CTGCAGGGCCAGATTGGCAA, GGATGCACTGGATCAGGTGG, GTACCAGAGCAAGGGCAAGA	6	6658, 4230, 4528, 1290, 3099, 1856	0.4531	268	0.4205	269	0	0	5	6
SLC22A12	ACCCCTCCTGGACAACAGCA, ACCTGCCCAGGCCACCCACG, CTTGCTTTCAGCCATGCGGG, GAGCATGAGAGTCACACACG, GCAGCGGTGGCTGGGCACGG, GTACTCACCTGTCTGAGGCA	6	1761, 2849, 1860, 3283, 8976, 2198	0.4541	269	0.4212	270	0	0	5	6
KDM5B	AACCCCATGATATTCCCCAG, AATAGAACCCGAGGAGACAA, CATTTCCCCAAAAGTACGGA, CCATTTCCCCAAAAGTACGG, CCTCTCCATGATGTTCCCAA, GCAAAGTACTGGGAGTTACA	6	4175, 1865, 3746, 6677, 3216, 1400	0.4553	271	0.4227	272	0	0	5	6
HMG20A	ATTCAGGTTAAATCACCCAG, GGAACAGTATCAGAAAACAG, GGTGCATTGCTGTCTCGAAG, GTAATGATCTGGCTACCACT, TAAAGCAGCTGCTTACCCAG, TCTTCATCTGCAAAAAGGGG	6	1345, 2668, 3738, 1870, 5686, 5166	0.4565	272	0.4238	273	0	0	4	6
TDRKH	AGAGCGGCTGACATTTGTTG, CCTGTGACAAAGAATCAGAA, GAAGACATGACAGAGCCAGG, GCAAGGAGCCAATATTAAAC, GCTGTGGTAGTGTCAAAGGA, TGCTCATTCTGCAGAAACCA	6	2364, 934, 4973, 4269, 1893, 1878	0.4585	273	0.4258	274	0	1	6	6
STK38	AGTGGAGGCAGACAGTTTGT, ATACCTTGCTGTCCAAAAGA, GAGTAACCACACAAAGGAAA, GCTTGTTCAGAAGAAAGATA, GGAACTCCATGATTAGGTAG, TGTTGAGCCTGTCATTGCCA	6	4854, 1880, 3917, 4614, 1614, 5979	0.459	275	0.4267	276	0	0	5	6
DEAF1	AGTGACAGTGGCCAACGTGG, GCACATGGACATGGGCGCCG, GCTCACTGTCGTACACAGAA, GCTCCCGGCCAAGAAAAAGG, GTACGGTGCCGGAACATCAG, TTTCTTGGCCGGGAGCCAGA	6	1885, 3162, 1079, 5925, 6949, 3709	0.4602	276	0.4279	277	0	0	4	6
BCMO1	GAGCCCCTGGAAGCACACAG, GCTCATTCTCCGGATGTATG, GGGAGTCCAGATACAACCAT, GGTTGATTATCGTAAATACG, TCTCGGTGACTCCAAAGCTG, TGATTATCGTAAATACGTGG	6	3415, 5051, 5672, 723, 7393, 1888	0.4609	277	0.4289	278	0	1	3	6
ASPHD1	GCATGTCTTGGGAGCCCAGG, GCCCAGAGTGGAATGTGGAA, GCTGTCTCTCTCTCCTTCCG, GGAAGGGAAACAGTCCAGCG, GTAGCAGTACCAGAGGAACA, TCAGCGTGGAGAGAGGACCG	6	3261, 5906, 1891, 885, 5541, 2533	0.4617	278	0.4298	279	0	1	4	6
CARM1	AAGAAGTACCTGAAGCCCAG, ACCCACCTGGAAGTACTGCA, ATCCAGTTCGCCACACCCAA, GCTGAACACAGACCGCTCCA, GGTGAAGAGTAACAACCTGA, TGGAGCACGGAAAATCTACG	6	1111, 3087, 1901, 3677, 4134, 2066	0.4641	280	0.4332	281	0	0	6	6
SETD7	ATCCACATAATACCCCTCCA, CCTCCACAGACAGATTTGAG, GACGATGACGGATTACCGCA, GTGACTGTGCAGAACCCGTG, TATGTAGACGGAGAGCTGAA, TTATGTCCACTGAAGAAGGG	6	4337, 1910, 1055, 2095, 6043, 4675	0.4663	281	0.4367	282	0	0	5	6
ALKBH3	AGCAACCAAGACTTACAGCA, ATGCCAGTCCTCTGTTTCCA, ATTCTTGCCTGGCTGAGCAA, GCCAGGATACAAACAGACCC, GCTTACCTAGATACACCTGT, TCTTTCACGTCAACAAAGCC	6	6759, 1913, 1824, 6678, 6355, 1943	0.467	282	0.4375	283	0	0	3	6
PADI2	AGAACTATCTCGTATCCGGC, GCACGTACACCGCCTCCACG, GCTCCCGTACTGCAGCCGCA, GCTGCAGTACGGGAGCCGCG, GTAGACATCGGTCCAGAGGT, TGATATTCCGGATTGCTCCG	6	1915, 3937, 1388, 4437, 5202, 4137	0.4675	283	0.4379	284	0	0	5	6
MED20	GCAAGGGCCATTCTCAAAGA, GGACTGTGAGACTTACCATA, GTGCTTATGGTGAAGCTCAA, TCACTGACCTTGGCTGCCAA, TGGTGTCAGCAATAAGGCAA, TTTCCGGGTAAGGAGCTCTA	6	814, 7778, 1923, 6682, 8291, 7520	0.4695	284	0.4398	285	0	1	2	6
AEBP2	AGGCATATGCTGACACACAG, ATACATGTAGATGGTCAGCG, GACCATCTACATGTATGGAA, GGGCCTTGATGTACACACGT, GTAGACAGCACAATTTCCAG, TAGACAGCACAATTTCCAGT	6	1925, 4278, 4516, 1241, 5598, 5031	0.47	285	0.4404	286	0	0	4	6
CHD5	CCGCTGCCCGAGATCCCAAA, CGTTCTCCCGAATCACCGAG, CTACGTGGTCACCTACACGG, CTGCTTGTCGAACTTGACCG, GCAGCTGGAGCTGTACCACA, GGAACACTCACAGTACAGCG	6	2583, 3431, 5505, 1927, 1693, 5184	0.4705	286	0.441	287	0	0	4	6
MTA3	ATTAGTGTCTTAGTACCACT, CTATCCTTCTTATTAGGTAT, GCAACCCATACCTAATAAGA, TATTAGGTATGGGTTGCTGG, TGATTCTGTCTCATTCAGAA, TTAGACTGCAAGTGGCAACG	6	4178, 1712, 5344, 5885, 1928, 6518	0.4707	287	0.4413	288	0	0	3	6
PHF21B	CCCGACCCAGGAGAACCCCG, CTTACCTTCCAAATGTTCCG, GGACACGTACCTTCCAGCAG, GTTACCACGGAACATTTGGA, TGAGATGGCTCCTCTGTGGG, TTGTCAGCACTGATGAGGAG	6	5300, 3501, 1932, 4140, 5113, 950	0.4717	288	0.4421	289	0	1	4	6
PRDM2	CTTCTGCTGTTGACAAGACC, GATGCCACTGATCCAGAGAA, GGGTCTTGTCAACAGCAGAA, GTACCCGAACATGTGCTGCG, TGTATTACCCAAATTTGGGA, TGTGCTGCGAGGACTTCCGG	6	4940, 3777, 1938, 4090, 1679, 2916	0.4731	289	0.4434	290	0	0	6	6
ADRM1	CATCCAGAAGAAAAGCCGCT, CCGCTTATCCGGAGTCACGG, GCTGGTGTACATTCAGCAGA, GCTTGAACTCACAGTCGTCA, GTACTTGGTGGAGTTTCGGG, TGACGACTGTGAGTTCAAGC	6	2686, 890, 4604, 1942, 3990, 4649	0.4741	291	0.4443	292	0	1	6	6
ADHFE1	ATATGGAGCAGCAGTTACAA, CCATAGCTACTTGCACAGGA, GATTATGTCAGTGCCCCCAT, GGGGATGCCATTCTTCACTA, GTACGCGACCCGGGCTCGGG, GTCAGTGCCCCCATTGGCAA	6	2821, 1946, 2638, 4485, 1669, 6508	0.4751	292	0.4454	293	0	0	5	6
MGMT	ACAGCTCCAGCTTCCCCAAA, GACACTCACCAAGTCGCAAA, GACCTCCGAGAACCGCAGCG, GACCTTGCTGGAAAACGGGA, GATGGTGAAGAGCCGGCACG, GTGGAAATAGGCATTCAGCC	6	2451, 1947, 1457, 7288, 4850, 4839	0.4753	293	0.4456	294	0	0	5	6
TAT	CATGCACGTCCAGAATTGAG, GCACGTCCAGAATTGAGGGG, GCAGGTTTCCAAACACAGTA, TCATGTTGTCCACAATGGCT, TGAAAGGCAGAAAGGCCAGG, TTTCAGGCTTCCTATCCAGT	6	3786, 1823, 1957, 7099, 4061, 6238	0.4778	295	0.4474	296	0	0	4	6
STAT5B	ATACAAGCTCAGCAGCTCCA, ATATATTGTACAATGAACAG, CTATGCCACACAGCTCCAGG, GCATCAGCAAGGCTTCCAGC, GTTCATTGTACAATATATGG, TGCTTGGCTTTCAATCCACT	6	5141, 5877, 5316, 1432, 1963, 2963	0.4792	296	0.4488	297	0	0	3	6
KDM4B	ATCAAAGTCCTGGTGCCGCG, ATGTCATCATACGTCTGCCG, CTTTGTCTCCCCGATCTACG, GCCGTAGTCAATCCACCGCA, TCACCAGGTACTGTACCCCG, TCTCGCTGTTGGCCAGGCGG	6	1964, 4724, 1387, 4994, 6011, 7730	0.4795	297	0.4493	298	0	0	4	6
MYSM1	AAAAAGAGCTGTTTGAACAA, AATGGTAGAGGAAAGCCATG, AGGCGGATGTGGATATCGAA, GCACGTCCCCTTAAACATGA, GGCGGATGTGGATATCGAAG, TCACTGCTAGAATTCTTCTG	6	5759, 5676, 1100, 3248, 4310, 1968	0.4805	299	0.4507	300	0	0	4	6
TCEA1	GATGGTGCAGAAGAAGAACG, GCCTTGCAGTCCACAAGAAT, GCGTATTTCAGTACTTCCAG, GCTGCAGCTCTTCGAACAGG, TACATCGCAGAACAGCCCTG, TCGCAAGCAGAGTACAGATG	6	1969, 3907, 6017, 2764, 4165, 972	0.4807	300	0.4509	301	0	1	5	6
BRPF1	AATGAGCGTCGGAAGACAGA, AGTACGACTCCTTCTCCAGT, GCACAATCCACAGCACGAGA, GCCACCATACGAGTGCCCGG, GTACATCGAGAAGTCTGCAG, GTGACTGTGAGACCTCTGAG	6	7696, 6732, 8115, 1974, 6067, 1754	0.4819	302	0.4524	303	0	0	2	6
ACTL6B	AGATGAAGTCCCCTGCCAGA, ATGCCAGCTTTGCAAACGGG, GCACCCAGTGCTCATGTCCG, GCAGCGGGCACTATGAGCGG, GCTGTAGGTGTGATCCAGGA, TTACTCATGCCATTCTTGAG	6	5377, 1975, 3005, 6334, 1347, 5319	0.4822	303	0.4525	304	0	0	3	6
GFPT2	ACATGAACTACAGAGTCCCC, AGAAGCAAAGAAGAATTCCA, CAGCGCTCAGACAAAGGCAA, GGTGGCTGTTGACAGCACTG, TCACAGGTGTGGCGATCGAT, TGAAGAATATCTGTAAGACA	6	1978, 5252, 4868, 6162, 1675, 2438	0.4829	304	0.4531	305	0	0	4	6
TRIM16	ACAGCGACTCTGCAGAGCAG, CCACGTCCTCTTCTTCCACT, CTCCCTGCCAAGCTTCTCCG, GCACCCAGTTAGACTTGGAG, GTCGGTGTCAGAGGTCAAAG, TTCTGGGTCAGCCAGCCCAG	6	5513, 2810, 2882, 7155, 1284, 1979	0.4832	305	0.4536	306	0	0	4	6
TFCP2L1	GCACACAACACATATTGCAG, GCTTCTGCATTCATTCAGGT, GGCGGTCATGGAAGACCACA, GGTTCCTCCTGCTTGAAGAT, GTACTCTGCTCGCAGCCGAA, GTCAGTCTTCTGTTTCCGAT	6	1981, 4003, 4197, 5876, 5395, 615	0.4836	306	0.4543	307	0	1	4	6
HILS1	AAGACACTTCACCTACCCCA, AGTCCAAGCTCAAGGTCAAG, GCCTCGCATTCTTTCCCACG, GCCTGCCTCATTAATTGCAG, GCTTATCAAGGGGGTTCGAA, GGAGGCCTGCTTCTTGCCCA	6	3982, 4953, 1993, 769, 2861, 5281	0.4866	310	0.457	311	0	1	5	6
PAWR	CGTGACGAGGAGGAGCCGGA, GCAAGGGGCAGATCGAGAAG, GCTGCTGGTCCGGTAGCCAC, GGGGGCTCTGGGCACCCCGG, GGGTGCCCAGAGCCCCCGCG, GGTGGCTACCGGACCAGCAG	6	3123, 2969, 2902, 1980, 4991, 1995	0.4871	311	0.4573	312	0	0	6	6
MAML2	AGAGTGTTAGTCTTTCGCAG, ATGTCTGCTGACCAAAAGAA, CCTTCTGTCTTTCAGCTCCA, GATCCATCAGTTGTTCTCCA, GGTGGCCTCCAAATAAACAA, TGTGAAGGACGATATGAACG	6	1948, 2036, 5220, 4920, 4382, 1996	0.4873	312	0.458	313	0	0	5	6
DYRK1B	ACCAGGCCCAGATTGAGCTG, ACTATGCGAAGAAGAAGCGG, CCAGGATTCGAGCAACAAGA, GCTCAAATACCAGGCACAGG, GGTTGCATCCCGGAAGGCCA, GGTTGTCGTCATCATAACCA	6	4450, 1997, 4407, 3961, 1582, 5510	0.4875	313	0.4587	314	0	0	5	6
SIRT2	ACTCCTGCGCTGCTACACGC, AGGATAGAGTTCCTTGGCGA, GCGAAAGTCGGGGATGCCTG, GCGCATGAAGTAGTGACAGA, GGACGAGCTGACCTTGGAAG, GTACCATCTTCCCTACCCAG	6	5340, 4305, 1999, 607, 4227, 2872	0.488	314	0.4594	315	0	1	5	6
POLR3G	ATACTTACAGGAAATAGTGG, ATATACTTACAGGAAATAGT, ATATATGCTGGCTTTGAAAC, GAAACACCTGAAGAAAGACA, GAGGCTGTTGGATTTAGCAA, GTGCCACTGAAAACAGGAGA	6	5339, 1921, 2011, 2030, 5721, 2833	0.491	316	0.4634	317	0	0	4	6
DACH1	CCGAAGCGATGGGCTCCGGG, GCCACAGTCACCTCTACCGG, GGAACAAGTTCGCATCCTGA, GTACTCAACCCCGTCCCCAG, TTGAGTACACGGGTTTCCCG, TTTGCACTCATTATTCTGAG	6	6108, 2136, 1617, 4072, 4096, 2013	0.4915	318	0.4641	319	0	0	5	6
TRIM24	AAGTTTATCAAACGTGGAGG, AATCACAGCCCCAAACCCAA, AGGACAACGCAGAAGCCAAT, CCACACTGTCAGACAGAAAG, CCTCGGCTGCGGCCTCCGGG, TTATGAAAAGGACAAAACAC	6	6886, 3161, 2016, 971, 3502, 4234	0.4922	319	0.4647	320	0	1	5	6
SETBP1	CAAGGAGGCAAACTTCACAG, GCACAGCCAGGAGCAGCTGG, GCTTGGCTGAGGAGACCGGC, GGGCGAGTCAGACTTCCTGC, GGTCCTGGAGTGGAGAGCAA, TGTGGATTCCAACTCCAACG	6	2018, 3225, 1306, 4506, 2921, 2521	0.4927	320	0.4653	321	0	0	6	6
CREBBP	ATTAACTTACTGGAATTCCG, GCAGCCGTGGAAGCAGGAGG, GGTAGCCTATGCTAAGAAAG, GTACGAGTCTGCCAACAGCA, TAATTAATCAGGCTTCACAA, TGGACCTCTCCACCATCAAG	6	2151, 7131, 2020, 543, 6031, 7205	0.4932	322	0.4658	323	0	1	3	6
GPT	AGACGTTGTTGGGGTCCGCA, GATGTTGGCACGGATGACCT, GCGAAGGTGCTGACGCTGGA, GGTGGATTACTACCTGGACG, TGACGATGCCAAGAAAAGGG, TGTGAAGAAGCCTTTCACCG	6	3639, 4488, 946, 2023, 4919, 4557	0.4939	323	0.4665	324	0	1	6	6
LPIN2	ACTGTGAAGGAACTCTACAA, CCTGAGATCCAAAGAGAAAG, GCTCAGATCAGAGTCTCACA, GCTGCCGGTTTGGATTCTGA, GTGAGCTCCGATGATGACAA, TGAGCTCCGATGATGACAAG	6	6027, 2026, 2684, 3915, 1984, 6378	0.4946	324	0.4675	325	0	0	4	6
AADAT	CAGAAGACATGAATTACGCA, CATCTCTTCTCCAAATTGGA, GCTCAACAGCTGCACCCACT, GTAGCTGACATATTGAGCAG, TTAATAATGTTGCAGCCCAG, TTTCTCACTCATGGTCCGGA	6	6339, 2483, 2602, 3426, 2027, 1846	0.4949	325	0.4681	326	0	0	5	6
M1AP	AGTTCTGCAGAGCCTCACAG, ATAAACTGAACAGGGACATG, ATATACTTACCACAAAAGGG, ATGTGCACAATGAGAAGCCG, GATCACAAGGTGCTTCTCTG, TCTGACCTATACCTCCCTGG	6	1313, 6954, 5847, 5083, 3006, 2031	0.4958	326	0.4698	327	0	0	3	6
HPDL	AGCCGGGTAGGAAGGGTCCG, CCAAGGTCAGGTGGTCCACG, CGGCAGCTAGCCCTGCGCAG, GATGTGGCACAAACGAAGGG, GCTGACCACGGCGTAAGTGG, GGGTGCCGCCACTTACGCCG	6	2032, 1945, 3270, 7521, 2560, 7076	0.4961	327	0.4702	328	0	0	4	6
H2BFS	ACTAAGGCGCAGAAGAAGGA, AGGCGCAGAAGAAGGACGGC, ATACGGAGTAGCTCTCCTTG, CTTCGAGCCCTTCTTGGGCG, GCTTTCTTCGAGCCCTTCTT, GTAGTTCGCCTTCAACATGC	6	7939, 4275, 8047, 841, 2035, 4106	0.4968	328	0.4709	329	0	1	4	6
NAB2	ACAGCCGAGCAGCCGCCGGG, GATCTTCCGGAGCTTCCCAA, GCAGGGGGAGGAGTCCCTGA, GCGCTGTCCCCTCCGCCCGG, GCTTCTCTCCAAGTTCAAGG, GTACCATCTCTGGCTCCAGT	6	1808, 3450, 3658, 5349, 2039, 2277	0.4978	329	0.4719	330	0	0	5	6
P3H1	AGTCGGGGTCCAGCTCCCAC, GAGCCCCTACAACTACCTGC, GGCCGCTGCCTCCCAAGCCG, GTGTGCCGCCGACTTCCCGT, TCATTCTTAGATCAACAAGT, TCTCTTCTTCCCCAATGACG	6	2041, 5027, 1027, 5528, 4181, 4767	0.4983	330	0.4727	331	0	0	4	6
OGFOD2	CAACACCATGAACAACTACG, CATCGCGAGTTCCTACCACC, GAGCAATCGGACATGCCTAA, GCCACAGTCAGGGTACAGCA, GCGCTGTGAAAACAGGCACC, GGGTACAGCAGGGCCATCAG	6	2143, 3840, 2042, 1859, 7624, 4708	0.4985	331	0.4731	332	0	0	5	6
CHD1L	ATAAACTGCTGGCCTCTGAG, ATACTGGGAGAAACAAAAGA, CCTTGCCTGCAGCAGAAGGA, GGGAGAAAAGTAAAACCCGA, GTATATCATATCATACCTGG, TCATACCTGGAGGTCAGCAT	6	4223, 2941, 4858, 2046, 5235, 1779	0.4995	332	0.4745	333	0	0	5	6
WWC1	AGGATCCTCGAGTACAATGG, ATTAGTGATGAGTTGCCGCT, CCACCAGCTGGATCGACCCG, CTGCATCACCACCATCCACG, GGATCCCTCACGTCCAGCCG, TATGCCTCTTCCCATCCTAG	6	3423, 910, 2053, 2397, 5406, 2812	0.5012	333	0.4761	334	0	1	5	6
CHUK	AAAGCTCCAATAATCAACAG, ACGTCTGTCTGTACCAGCAT, AGGCCTTTACAACATTGGCA, CTTATTCTCAAAGAGCTCTG, GTACCAAAAACAGAGAACGA, TGATGTGCCTCTTCTAGCAA	6	2054, 805, 6453, 2206, 3564, 4098	0.5015	334	0.4767	335	0	1	5	6
MEG3	ATAGGTGCAGGGTGTCCCCG, CGTCCCTGCATTCACCCGCG, GCAGATTCAAGCTATCCCCA, GGACACCCTGAGGAGACACG, GGAGATGGAGACACCAGCAG, TGATGCGGTTCCAAAGCACA	6	3771, 6321, 1545, 2056, 5417, 3118	0.502	335	0.477	336	0	0	4	6
AS3MT	ACTGGAATAGACATGACCAA, CTACATTGAGAAGTTGGGAG, GCACAGGGCACTCTACCTTA, TCGGCAGACCTCCAGACCAA, TCGTGACGCTGAGATACAGA, TGAGATACAGAAGGACGTGC	6	4754, 2059, 1822, 4354, 3336, 2148	0.5027	336	0.4778	337	0	0	6	6
BASP1	AAGCTCAGCAAGAAGAAGAA, GAGCCCGCCGAGGCCAAGGA, GCGGAGCCCGAGAAGACGGA, GGACGCCGAGGGCAAGGCCG, GGAGAAAGACAAGAAGGCCG, GGAGGGCGAGAAGGACGCGG	6	6624, 1805, 2062, 2194, 2852, 5408	0.5034	337	0.4792	338	0	0	4	6
KDM2B	CCAGCGATACGACGAGAACG, CCTCACTCAGGAATACCAGA, CTGCCCCCACAGATGCCCCG, GTAGACTCTTTGGTGTTCGG, GTTGGCGGCCAACTTCACCG, TCTTTGGCCAAGTCACCACA	6	1297, 6315, 4559, 4954, 4088, 2069	0.5051	338	0.4812	339	0	0	5	6
ITGB3BP	AAAAGATCACTGAAGTTGGA, ATAACTTATTCTCCAACAAC, CCCGAATCTCAGAATGCCGT, CTTTGCTTTCAGTTAAACTG, TGTTAAAAGATCACTGAAGT, TTGATCCTTCAAAAATCACA	6	6812, 2070, 4530, 5343, 4670, 1553	0.5054	339	0.4814	340	0	0	4	6
TAF1A	ACCTTATTCAGGCCTATAAA, ATAATTGGTGAGTACCTCTT, ATAGATGCTGGAATTCTATG, CTACATAACTCTTCACAAAA, GCTGTGGTTGAACACATCCT, GGATCGAGATGGAGCCCAAG	6	2073, 1583, 7123, 3343, 2904, 9038	0.5061	340	0.4818	341	0	0	4	6
SATB2	AGAGCTGTGAGAATACCCCA, ATAGACATCTTGTAGCATGT, GCATCTGTCACATAACTGAG, GCTCTGGCTTAACTGCTCTG, GCTGGGGAGAAAGAAGACCA, TGTGTCGTGGAGCAGTTGGA	6	3143, 2074, 599, 3027, 8300, 2260	0.5063	341	0.4822	342	0	1	5	6
IL1B	CTACAGCAAGGGCTTCAGGC, CTACCTTCTTCAAAGATGAA, CTTCGACACATGGGATAACG, GCTGGATGCCGCCATCCAGA, TCCGACCACCACTACAGCAA, TTGTGGCCATGGACAAGCTG	6	6260, 1686, 2075, 4905, 2596, 5960	0.5066	342	0.4823	343	0	0	4	6
SIAH2	ACAGGGAAACAGGACTGCCG, GACCGGACACTCGAAGAGCG, GGCAGCAGCTCAACTTCTGG, GGCGGCGGCTGCTTGCTGCA, GGCTATGGAGAAGGTGGCCT, GGTCAGCTCGTGGTGCTGCG	6	4465, 1177, 3138, 5547, 2076, 3947	0.5068	343	0.4827	344	0	0	5	6
BAZ2A	ATAAGACCCTGGCCACACAG, ATTGAGGGAAGGGCAATCAA, GCACTCACCTGACAGTAGGA, GTAGTTCCAGAGACAGTCGT, TGTGGAATCGTTACACCAAG, TTAGTACCTGAGCCGCAACG	6	3500, 5186, 4118, 2978, 2080, 1844	0.5078	344	0.4837	345	0	0	5	6
TDRD1	ACTGCACGTAGAAGTCCCCT, AGAAGCGTAAGCCAAAACAG, ATTTCCTTAGTAACTCCAAG, CCAATGTTATCCCAGCAGAA, CCTTGTCCATAAGTAATCCA, GGATATGGCTTGAAACCCAG	6	597, 2083, 3390, 3410, 4618, 2683	0.5085	345	0.4845	346	0	1	6	6
ZNF274	AGTGACCTCGAGGCAGCAGG, AGTGAGCAGGTCCAACAGCA, GATACTCCCCGCTTACCTCA, GCACCCAGAGAACTGCCAAG, GCCTGGATCTGGGCATTCCG, GGTCCTCACACTGAACCAGG	6	2085, 2578, 5320, 7815, 993, 3523	0.509	346	0.4849	347	0	1	4	6
TDRD9	AGAAATCCTTGTGTACCAGC, GCAGTGTGACATGCATCCCA, GCTCTCTCCTCATCTCCTGG, GGCCCCATGGATAATCACCA, GTCCTACCTTTCGAACGCAG, TCAATGTCACTCAGACCAGG	6	6206, 2766, 3290, 2329, 2093, 1982	0.511	347	0.4878	348	0	0	5	6
SATB1	AACAATGTGAGTGATCCGAA, ACAGGTTTCGACCAACACAG, ATAGATCTACTGACAGGGGG, GAGTATGGATCATTTGAACG, GCATCTGTCACGTAAGACAG, GCCATGGGAGAGCTGCGCAG	6	3978, 2097, 4405, 5501, 691, 2342	0.512	348	0.4885	349	0	1	5	6
IPO4	AGAATGTGAGGACTTCAGAG, CATTGCGTACAACTTGCGAG, CCTCAAGTCCCTGATCCTGA, GCATTGCGTACAACTTGCGA, GCTCCTCGCCTACTTGAAGT, TTACTCTGTTTCTCTCTGCA	6	4629, 6400, 2098, 5179, 1785, 3465	0.5122	349	0.4886	350	0	0	4	6
CITED1	AGTTCCTCGGGATCTCCAAT, CGTGGCCTACTCCAACCTTG, GGAGATCCCGAGGAACTAGT, GGCCATTCTGCACTACCCTG, GGTGAAAGATCGCAAAGCAG, TTCCATTTGAGGCTACCCCA	6	1525, 3772, 5756, 5873, 2103, 5728	0.5134	350	0.4899	351	0	0	3	6
NAP1L2	CCCTTCTTCCCCAAGCCCAG, CGATACTGATGAGGACTCAG, CTATTATTATGATTATGCTG, GGCCGAGTCAGAGAACCGCA, GTCAGAATCCAGTCAAGAAG, TTTAGAATCCAAATTCCTGA	6	2106, 2298, 5128, 6081, 5264, 573	0.5142	351	0.4906	352	0	1	3	6
SKOR2	AGGTTGGCGTGCCCTGGCCG, CCGACACGCTGAGCCAGCCG, CGAGATCCACAACCGTCGCG, CGGCATGATCACCAAACGCG, GGAGATCCTGCGGCGTGCCG, TGATGCCCAGTGCCACGCGA	6	2107, 3821, 1518, 4282, 2509, 3657	0.5144	352	0.4909	353	0	0	6	6
ASF1B	AAGCTGATCTCGAACCGGAA, ACTCGAAGCTGATCTCGAAC, ATATCTTTGCAGACCTGGAG, CATCCCAGAGACTGATGCCG, CGAGTGCAGTGAAGCCCTGG, GGTGTCGGTGCTGAACGTGG	6	3539, 6528, 5398, 566, 5937, 2108	0.5146	353	0.4911	354	0	1	3	6
PHF20L1	CCATGCCCGAGGATGCTAAG, CTTAGTGCTGGTCTCTCAAG, GACCAGCACTAAGAAAAGAA, GCACATTAAAGCCATGCCCG, GGAGTCATCGTTATGATGAG, TCTTAGTGCTGGTCTCTCAA	6	3630, 5454, 3902, 1380, 2112, 5752	0.5156	354	0.4926	355	0	0	4	6
HINT1	AGGCCGAGCGACCTGAGCCT, CCAAAGATCGTGTCGCCACC, CTTTGGGAAGATCATCCGCA, GATGGCAGATGAGATTGCCA, GCTCAGGTCGCTCGGCCTGG, GGTATCACCAGAAAATGTGT	6	3615, 2118, 4756, 5793, 5554, 1287	0.5171	355	0.4935	356	0	0	4	6
PRDM5	AAGTCCTCCCGGGTTCAGGA, ACACAAACCTGGCATCCCCC, ATTGCACCAGAAACCCACAG, CATGCCGTCCTGAACCCGGG, GCACCAGGAGACTTGCCGGG, GGATGCCCTGAAAAGACACC	6	6522, 2124, 1759, 3453, 6645, 4050	0.5186	356	0.4952	357	0	0	4	6
IDH1	ACCCATCCACTCACAAGCCG, ATAACCTACACACCAAGTGA, ATATTTCGTATGGTGCCATT, CTATCACTCCTGATGAGAAG, GCATGACGACCTATGATGAT, TTATCTGCAAAAATATCCCC	6	4099, 1329, 2395, 2130, 2801, 5409	0.52	357	0.4967	358	0	0	5	6
PADI3	GCACAGGTCTTCCACATCTG, GGGAGCGTGCAGACACCAGG, GGTGAGGTAGAGCACCGCAT, GTGCTGGGCGTCATGATCCA, TCTGCTGGACGACTCCAACG, TTACCCATAAATGTCCACGA	6	6361, 4292, 6106, 2548, 2131, 797	0.5203	358	0.4972	359	0	1	4	6
KDM3A	AGAACATGCACCTTCCCCAT, CGAATGGTCCCGGAGAGCCA, GATACTGCTTGGCTGTACTG, GCTTGGACCCATCTACTCAG, TCTGTTGCTCCTTATCCTTG, TTTCTGAACGAATTGTACAG	6	6458, 2649, 561, 6726, 3767, 2133	0.5208	359	0.498	360	0	1	4	6
ING1	AGCAACCACGACCACGACGA, CCAACAGCAAGCGCTCACGG, GCAGGAGCTGGGCGACACAG, GCGCCTCGAACAGCTCCACG, GCGGCAGGTGGACAGCCACG, GGACAGGCCCAAAGGCGAGG	6	4391, 4247, 1411, 2139, 5503, 8023	0.5222	360	0.4994	361	0	0	4	6
MAPK3	AGTAGGTCTGATGTTCGAAG, CCACGTGCGCAAGACTCGCG, CCGACCCCCTCGGTTCTACG, GCAGTTGCAGTACATCGGCG, GGAGCCCCGTAGAACCGAGG, GGGAGCCCCGTAGAACCGAG	6	3421, 2141, 2279, 3689, 5079, 1906	0.5227	362	0.4998	363	0	0	5	6
LIN9	CAGCCTTTGAAAAAGCGGCG, CTCCGCCCCACAATGCACCG, GCGCGGCTCGTTCAAGATGG, GGCGGCTTATGGGAAAACCA, GGTCACCTAAAAGAAACCAG, GTCACCTAAAAGAAACCAGA	6	6851, 5089, 2155, 8410, 2918, 1517	0.5261	363	0.5048	364	0	0	3	6
C17orf49	ATATACCTTGCGTTTCACAG, CAGCTGAGTCACCCAAGAAA, CATGACGTCAGCGTCCACAA, GGTCGGAGAGATCTTCTCGG, GTACCCCGCAGGAGAAGAGT, TGGCCGACTCTTCTCCTGCG	6	2543, 2156, 1376, 2713, 3414, 3694	0.5264	364	0.5053	365	0	0	6	6
CBX4	CCTTGCAAGATATAACACGT, CCTTGCGCCCACTTGTCGGG, GATCGTGATGAGCAAATACA, GTATTCACCTGCACCACTAG, GTTCCCTCCCACCCAGGGAA, TGGAGAGCATCGAGAAGAAG	6	4344, 5581, 1435, 3560, 2157, 7197	0.5266	365	0.5054	366	0	0	4	6
AXIN2	ACACCAGGCGGAACGAAGAT, CTGTCTCTTCCAACACCAGG, GCCCAAGGAGATGACCCCCG, GCTTCCGTGAGGATGCCCCG, GGCGCAGACCGAGATCCAGT, TTTGCTGGACAAGCCAACCA	6	4095, 2327, 1665, 3844, 5618, 2160	0.5273	366	0.5063	367	0	0	5	6
SMAD2	AGAATGGGCAGGAAGAAAAG, AGCAGTCTCTTCACAACTGG, CTAAATGTGTTACCATACCA, GAGTGAGTATAGTCATCCAG, GTTAGGATCTCGGTGTGTCG, TCTTCACTGATATATCCAGG	6	3049, 1735, 3306, 2162, 2722, 2207	0.5278	367	0.5073	368	0	0	6	6
TET3	ACACCCCTCCAGCAACGCCC, ACATCCAGTCAGTATTCAAG, GGAATGAGAAGGCTGCGGGA, GGGGTTCCCATACTTCCGGA, TTAGCTGCCGTGAGTCCCCA, TTTCATACCATGCCGCGCGA	6	2164, 4419, 956, 5718, 5533, 2413	0.5283	368	0.508	369	0	1	4	6
DHX36	ACACAGATCCCAGTTTAAGA, ACGTTGGCCAGATTATGTAA, AGTCGGTTGCCAAGGAAACA, GGGGCAGAAGAACAAGGAAG, GGTTTGCTCCTGAGGATCAT, TGTGGTACGCGAAAAAACAG	6	2169, 8037, 6409, 6059, 1354, 8917	0.5295	369	0.5097	370	0	0	2	6
PPP1CA	CATCCCCTCCCTCACCTCCG, CATCGTAGAAACCATAGATG, CCACATAGTCCCCCAGAAAG, CTGCGACTATTTGAGTATGG, GAGAACTTCTTCCTGCTCCG, GAGCAACTACCTCTTTCTGG	6	5947, 3791, 3364, 957, 2176, 5836	0.5312	370	0.5115	371	0	1	4	6
TRIP12	AGACCCTGAAAGCAACCAGG, CCACAAGACGACTCAATAGG, GGCCTAATAACAATCCAGGG, GGTCACTGCGACGTTCACAG, TCTCCGTGACAACATCTCCA, TGTGACATCCGAGGACCAAG	6	7864, 2183, 3514, 1023, 7715, 5776	0.533	371	0.5137	372	0	0	3	6
CCBL2	CATATGCTCCTACTGTCACA, GAGCTTTCACAAGTGATGGA, GGCAAACTTACAGATCTCAG, GGCCAAGATTCACAACAGAA, TGAAATTCACAAATGCAAAA, TGTGTAGGTGTATAACAGAG	6	2186, 638, 6276, 3203, 2811, 8247	0.5337	372	0.5153	373	0	1	4	6
KLF12	AAATTCATGGGACTTGAAGG, ACAGATAACGAGTCCTCCGG, CCAGATGCAGAGGCCACAAG, CGTCAACAGTATTAACTCCA, GCACCGACTGTACCACCACG, TCATGTTCACCGCATCCCCG	6	2190, 6218, 3174, 1191, 3187, 3021	0.5347	373	0.517	374	0	0	5	6
HSBP1	ACAGCCGTCCCTTACCACCG, ACCATGTCTGACCAGATCAT, CACCGAGGTGAGGTCCTGCA, CGTCCCTTACCACCGAGGTG, CGTGCAGGACCTCACCTCGG, GACCGTGCAGGACCTCACCT	6	2868, 4324, 3753, 2199, 975, 5527	0.5369	374	0.5209	375	0	1	5	6
AES	CAGTACTACGAGATGTCCTA, CCTGCCCTACCTCTCCCAAG, GATGCAGCGTCACTATGTGA, GATGCGGTCGCAGGAGTCCG, GCAACTCAAATTCACCACCT, TGGCTCTTACCTCTTGGGAG	6	2567, 7344, 2202, 4377, 3000, 1492	0.5376	375	0.5213	376	0	0	5	6
FLCN	CAAAAAGTCGGACATGTGCG, CCGCACTCTCTTCTGCACGG, CCGTGCAGAAGAGAGTGCGG, GCGTCGAGTCCAGCAGCCCG, GCTGCCGGTCACTTGCTGCA, TTCTTCGGAGATGAGCAGCA	6	583, 5081, 8159, 3723, 2204, 5788	0.5381	376	0.5214	377	0	1	3	6
SMARCA1	CGAATCTGATAATCTCTCAG, CTTCTTCTCGCCCTTCTCCG, GAAGGGCGAGAAGAAGAAGG, GATAGTGGCGGTCGCATCCG, GTAAGGCCCACAGTTCATGC, TGTGAGGTCCAGGAATATTT	6	2205, 4961, 8122, 4299, 3113, 2188	0.5383	377	0.5215	378	0	0	5	6
ZFPM1	ACTCACGCTTGATCTGCCGG, CCACATGGAGCAAAAGGCCA, CGTGTGCCTGATCTGCCTGT, GCACTTACTGTTGATCACTG, GTGCACACGGACACGCTGAG, TCTGGCCTCCATGTCTCCGA	6	6703, 3370, 4879, 1155, 5559, 2209	0.5393	378	0.5226	379	0	0	4	6
HSPBAP1	ACACACTAGATTCTTCATAA, AGGAAAGGAGTATCTTCAGG, GACCACTCCTGTGATCGTTG, GGACTCCTATGGTTGTAACT, GGGATGAAAAGCATGAGCAC, TTACATGTAGTTTCAAACTG	6	3598, 2210, 1739, 2270, 4201, 3282	0.5396	379	0.5228	380	0	0	6	6
WNT4	CTTCGTGTACGCCATCTCTT, GCTGTGACAGGACAGTGCAT, GTACCTGGCCAAGCTGTCGT, GTCATGGACTCGGTGCGCCG, GTGTGGCCTTTGCAGTGACG, TTACAGCCAGTTGCTCGCGG	6	2212, 3884, 4610, 989, 3224, 5750	0.54	380	0.5235	381	0	1	5	6
H2AFY	ACAGCCAGCAGGATGTGCCG, GAGTTGCTAGCGAAGAAGCG, GCAGCGAGAGACAACAAGAA, GCAGGAGTCATCTTTCCCGT, GCCACCGCCATGTCGAGCCG, TGTCAGGTATTCCAGGACGG	6	6979, 2214, 5180, 4043, 4935, 1502	0.5405	381	0.5242	382	0	0	4	6
PHYHD1	ACAGACTATTTCTTGAGCAG, CTACCTTCTGGAGCTGCGAG, GAGCCCCTCGCAGCTCCAGA, GCACCAGGAATCCATCCTGT, TCACCTTCACCGCCAAAGTG, TGTTGATGGATTTCTCCGGA	6	5743, 2561, 2217, 3102, 1592, 4882	0.5413	382	0.5251	383	0	0	5	6
USP49	ATAGATGCAAACATGTAGGG, CTAAGCAGCACCACTTCTGA, GCTAAGAAGCTCCCTCCTGG, GCTGTCCTTGAGAAATGACA, GGAGGTGGCTGAGCACCTGG, GGGCGTGGTCCTCAATATAG	6	2122, 3887, 5998, 2219, 6737, 3301	0.5417	383	0.5259	384	0	0	4	6
BAZ1A	AGATGAGCAAAGAAATTCAA, GCATCACCAAAGATTTCAGG, GTAGCTTTCCACAGAGAGCA, GTAGTGGCGGAAGATCTCGT, GTCCTGCTAACAGACGAAGA, TGTGAGACAGAAGCCGCCCG	6	2220, 994, 5870, 6054, 5156, 3619	0.542	384	0.5264	385	0	1	3	6
MTRR	AGAGGACAAGAGGAGATAAG, GTAGAAACCACAACAACAAG, GTAGCAGCTCTGACTTCACA, GTGAGAGTGGGGGTACCGAA, TAGAACTTGTGGTTGAGCCG, TGAGTCCTCACTTACCCGTT	6	6015, 2223, 3635, 7685, 732, 4036	0.5427	385	0.5272	386	0	1	4	6
FAM175A	AGATCATGACGTTTAGAGAG, CCTTATATAAACCTCAAAAA, CGCTTTCCAGCACCTCAACA, GCCGAGCAGTACAAACACAC, GGAGGGGGAGAGTACGTCGG, TGATCTGATCTGAATGACGA	6	7564, 2225, 1935, 5593, 7621, 5086	0.5432	386	0.5276	387	0	0	2	6
SIRT3	CGTTGGGCTTGTAGTTTCCA, GCCGGCATCAGCACACCCAG, GTACGATCTCCCGTACCCCG, TCCTTGGCCAAAGTGAAAAA, TCTCTCCCTGCAGATCGCCG, TCTGCCAAAGACCCTTCCCA	6	4040, 5843, 2226, 848, 8988, 5372	0.5435	387	0.5278	388	0	1	3	6
TCEAL1	AGGAAAGAACTCCTCCTCCG, GAGGAGCGCCCTCCGCAGGA, GCGGAGGGCGCTCCTCCGAG, GGAGGAGGAGTTCTTTCCTG, TCCAGGAAGGACCTGTTTGA, TCCCGAAAAGCAGTCCCCCG	6	7573, 6936, 4863, 5600, 2228, 1567	0.5439	388	0.5283	389	0	0	3	6
HDAC10	ACTCCGCCAGTGACTCCAGG, AGAGTACCTTTCACTGCGCG, GCACATGCCAAGCAGAAACA, GCAGGTTGACAGTGAAGCCG, GGGCAGCTCTCACCTCACCA, GTTCTGTGTGTTCAACAACG	6	5950, 1129, 3060, 2506, 2231, 4608	0.5447	389	0.5287	390	0	0	5	6
TCEAL3	AAAGCCAGAGAGCCAGCCGC, AAGAAAAGCCAGACGTGGAG, ACTGGAAGATGAGGGAAGCC, AGAATGCGAGGGAAAGAGAG, CAAAGCCAGAGAGCCAGCCG, GAGGGAAGCCAGGAAAAGCA	6	5178, 6487, 2245, 4167, 1330, 4396	0.5481	390	0.5319	391	0	0	4	6
PRDM12	AGATGCCGAGGCCCTCGCCA, CGTGCTCCGGGGCGATCACG, CTTCATCGATGCCAGCCAGG, GATGTCGGAGGTGATAACCT, GCAGATGTCCACGTGCTCCG, GCCATCCTCATTGAACACCT	6	995, 3652, 6834, 2910, 3389, 2246	0.5483	391	0.5323	392	0	1	5	6
MBD1	AGAGGGTGAGATCACACGCA, CCACAGTTCTCACAGCACCT, CGAGGGTGTGGAGTATGCCG, CTGACTTGCGAAAGACTTCG, GCCCCCCGCCAACAGAGCCG, GCTCAGACACCTATTACCAG	6	1796, 3692, 8503, 2248, 4213, 2547	0.5488	392	0.5328	393	0	0	5	6
CCNT2	GCTCTCGTGCCGCCAGCAGG, GGGTCAGGATAACAACCTGT, GTACCCAGTTAGTAAGAGGT, GTTACTCTAGAATTATTAGA, TATCCGCCTCCACTCCGCAG, TCACATTTAGTATCCAGCAG	6	3400, 6854, 6818, 4504, 2251, 1077	0.5496	393	0.5336	394	0	0	4	6
PLOD1	GCAGGATGAAGCTCTGCCCA, GCTCCTGAAGAAGTTCCGGC, GCTGGAGACCAAGTATCCGG, GGTTCTGGAAGATACGGCAG, GTGGCCACTAAGGAGACCGA, GTTTCGAAGGTCCAGAAGCG	6	938, 6743, 7274, 5701, 7496, 2252	0.5498	394	0.5342	395	0	1	2	6
AFF3	ATTGGCCTCACATACGCGGT, CTTTCTCCAGACTAACAAGG, GCGTATGTGAGGCCAATGGA, GCTCTCTGTTGGCCGTCAGA, GTAGTGCTACAGATAGACGA, GTGCACTGCACATCATACAG	6	2968, 7172, 6912, 1937, 2254, 3455	0.5503	395	0.5347	396	0	0	4	6
MECP2	AGAAGCTTCCGGCACAGCCG, CATCATACTTCCCAGCAGAG, CTTCTGCCTCCCCCAAACAG, GATAAGAAAGAAGAGAAAGA, GCAAAGCAGAGACATCAGAA, GTTTGTCCCCACAGTCCCCA	6	4913, 2261, 2782, 4805, 3526, 1825	0.552	397	0.537	398	0	0	6	6
GLMP	AGTAGAGTCCAAAGGAGCAG, ATATGAAGCAGGTTCTGCAG, CCTCACCCTGGTAAAAACAA, CTGAATTGCGGCCGTATGCG, GCTGGGGGAGAAGACCCGCC, GTAGAGTCCAAAGGAGCAGG	6	5963, 3572, 601, 2263, 5208, 7315	0.5525	398	0.5378	399	0	1	3	6
P4HB	ATACCAGCTCGACAAAGATG, CGGCCAGGCACAGCAGAGCG, CTGAGTATGCCAAAGCCGCT, GCGGAAAAGCAACTTCGCGG, GCTGCCACCACCCTGCCTGA, TTCTGCCTTCAGCTTCCCAG	6	3698, 1159, 6845, 8127, 4058, 2267	0.5535	400	0.5391	401	0	0	4	6
AJUBA	ACATACTGACCTCAGAGGGG, ACTTGTTGCAAACAATGCAT, CAGACATACTGACCTCAGAG, CCAGACATACTGACCTCAGA, GGATGGCATCCCCTTCACAG, TGGAGAAGTCCACTGTGAAG	6	2271, 2529, 2071, 6512, 7198, 4451	0.5544	402	0.5401	402	0	0	4	6
SETD1B	ACAGATGTCCAGCAACCGCC, CATGGGCAACATTATCCACG, GGAGGACCCACACAAAGCCA, GTACATAATGATGTTCGTGG, GTGCTCGCCCGACTTCACCG, TTATGTACACAATTCTCCCG	6	4184, 3507, 2847, 2618, 2272, 1417	0.5547	403	0.5403	403	0	0	6	6
NAP1L1	CTAACCTTTCAGCCTGCCTA, GATAGAAGCCAAATTCTATG, GCCCTTCAAGAAAGACTTGA, GGTCTGGTAGAAACACCAAC, GGTGAAGAAACAAAACTCAA, TGAAGGGCTGCAAGAATCTG	6	3922, 1989, 5809, 4666, 2275, 5241	0.5554	404	0.5414	404	0	0	4	6
RIPK3	ACAGGGTCCGGGGAGCCAGG, AGTTCCTCGATGGACACCAA, GCACCACTTCTTTCAGCAGG, GCAGCTCAGCCAATGAAGGC, GGCCTGTCCACATTTCAGGG, GTTCCTCGATGGACACCAAG	6	7089, 4865, 3666, 539, 5002, 2278	0.5562	405	0.5423	405	0	1	4	6
EDF1	ACATTCTATTACCAAGAACA, ATTTGGCCTGGGCGGCCGTA, CTGCTTGGATTTGGCCTGGG, GAGCGACTGGGACACGGTGA, GCTGCGCAAGAAGGGCCCTA, GTGACGGTGCTGCGCAAGAA	6	2282, 1121, 3808, 2775, 6142, 2767	0.5571	406	0.5435	406	0	0	5	6
CHD6	AGATGGCCTCCAGAAACAAA, AGGAACTGCAAACTTCTGGA, CGATAATGAGAAAAGGGCCG, GCTAGCCACCTGCAACCCCG, TGTTTGTTACAGGTTCACCC, TTTGTAGTCAAAATTGACAG	6	2265, 4121, 7302, 2287, 4346, 4785	0.5583	407	0.5454	407	0	0	5	6
LIF	CCCCTCAGTACACAGCCCAG, CCCTCAGTACACAGCCCAGG, GCCCATAATGAAGGTCTTGG, GCCCCTCAGTACACAGCCCA, GCCCTTCCACGCCAACGGCA, GCTATGTGGCCCCAACGTGA	6	4495, 5660, 1122, 4509, 2288, 5483	0.5586	408	0.5456	408	0	0	4	6
TAF12	ACTGCAGTGGTAAAGATACC, AGAGGTTGATTAGGGCTGAG, CATGGCCAATAGTACTGCAG, GAAATTGGAGAGGTTGATTA, GCAGTTGGATGAAGATGTGG, TTATGGATGAGAAATTGGAG	6	2289, 4896, 5492, 3463, 6566, 1402	0.5588	409	0.5462	409	0	0	4	6
HIST1H2BB	ATTCATGATCCCCATGGCCT, GAAGGAATTCATGATCCCCA, GCATCTCATCCAAGGCCATG, GGGGCTGGAGCAGACTTAGA, TCTGCTCCAGCCCCTAAAAA	5	1729, 8246, 6048, 5034, 2716	0.5714	422	0.5484	410	0	0	2	5
PTGS1	ACGAGTGTAATAGCTCACGT, CATCCCGCCCCAGAGCCAGA, CCTTCAGCAGGTCACACACA, GATGGGTCCTGGCTTCACCA, GTGTTGATGCACTACCCCCG, TGGAGCGTCAGTATCAACTG	6	2297, 2759, 4606, 1529, 4933, 4620	0.5608	410	0.5488	411	0	0	6	6
RSF1	AGAGGATTCTGAGTTCACAA, CATCAAACTGACACTCACAG, CCTCATGTACTGGTACCAAT, CTAGAACATTGGCTGTAGAA, CTGAGGCTAGTTTCTCACAG, GGATGAGGAGACTAAAAAAG	6	3958, 4966, 2303, 556, 6221, 5071	0.5623	411	0.5504	412	0	1	4	6
MED29	AGGGATGCTGAAAAGCAACG, ATAGGGATGCTGAAAAGCAA, CAGTCGTAACGCACTTCCGG, CTAGACCTTGATGAAGGTTG, GTAGACTCTCCTTCAGCTGC, TGTAGACTCTCCTTCAGCTG	6	2304, 1528, 5428, 8008, 3287, 5934	0.5625	412	0.5506	413	0	0	3	6
JMJD8	AAGGTTCCCGGCGTGCAGCG, AGTTGTCCGTGAGTCCCTGC, CGTGCAGCGCGGCTGCCTGA, GCAGCGCTCCTCCTCCGCCA, GCAGGGACTCACGGACAACT, TCGGGCCGACCTCACCTACG	6	697, 4060, 5363, 6564, 2306, 4481	0.563	413	0.5513	414	0	1	4	6
PADI1	ACACGTGTGAAAGAGCCCAT, CAAGGTGAAGAGGAGCCAAG, CAGGGTCTCTGGAAGCTCCG, CTCCAATGAGAAATTCCTGG, GTTGGGCGTCATGATCCAGG, TCTGCCAGTGATGTGCCCAA	6	3201, 7485, 5494, 2309, 7061, 1586	0.5637	414	0.5518	415	0	0	3	6
MBD6	AATACAGTAGGGGGTCTGCG, ATAGTGGCTGAAGACACTGG, CTAGCAATCGAAATACAGTA, GATGGCTCCGGGAGAGAAAA, GCAGCTCCCCAGTTGTATGA, GCGGGGAGATTATTGCTCGG	6	998, 5411, 2311, 6105, 3469, 5480	0.5642	415	0.5524	416	0	1	3	6
DHX38	AGAGTCAGTGAAGAGATGGG, CTTCCTATCGGGATTCTGAG, GCAGTGGGAAGATGACCAGA, GCTCCGCTCAGAATCCCGAT, GGACTTTGAAGAGGACAACG, GGATGCCTCGATCCATCGAT	6	7626, 3628, 5075, 4417, 1687, 2314	0.5649	416	0.553	417	0	0	4	6
ZNF136	AAAGATCACTACAAACACCG, AAGATCACTACAAACACCGA, AATGAACTCAGAGAATGAAA, AGACACATCAAAGATCACAG, AGACACATCATCACACACAG, GTATATGGAGAAGTCAGCAT	6	2396, 3940, 1255, 2318, 2628, 4385	0.5659	417	0.5541	418	0	0	6	6
LEF1	GATGGAGGCCTCTACAACAA, GCAGTCAAATAAAGTGCCCG, GGTGTTCTCTGGCCTTGTCG, GTAGGGATATCAGGAGCTGG, GTGATCTGTCCAACACCACC, GTTTGGAGTTGACATCTGAT	6	2319, 760, 5726, 5794, 2476, 2389	0.5662	418	0.5542	419	0	1	4	6
COPRS	CATGGACCTTCAGGCCGCCG, CCTAATGACAGTCCTGCCCG, CTCTTTGTCAATTTAGCCCG, GCCCGCCGCTGCCTAGCGCG, GGGGGCGCCCCCCAGCCCGG, TGAAGAGGAAGGCTTTGCCA	6	7751, 4661, 5066, 2322, 686, 6943	0.5669	420	0.5546	421	0	1	3	6
RCBTB1	AATAGACGCGATCTCTTGAG, AGAGATCGCGTCTATTCGGA, GCAAAGCTGCCACTCTCACA, GCCATTGTCCAGAACAGCCA, GCTTGAAGCCAGAGTCATGG, GTACAGTGCTTCACTGGCTG	6	4554, 574, 2446, 6045, 4149, 2341	0.5715	423	0.56	423	0	1	5	6
ALDH2	ACAATGTTGACCACACCAGG, CTATGTCATCTCCTACCTGG, GCACAATGTTGACCACACCA, GGACCATGTCCAAATCCACC, GGCTGGGCTGATAAGTACCA, TCATCTGTCAGGTAGCTGAA	6	2343, 3794, 2431, 4862, 6209, 1871	0.572	424	0.5611	424	0	0	5	6
NRIP1	AATCTTGCAGCACATGACAA, AGGACTGGAATGCAGCAAAG, CATCATTGTGTACTCCCTGA, GAGTAGTCCGATTTGTACTG, GCTGAATGACTGAAGCAAAG, GGATTGAGTGAAGTTATCCA	6	6511, 2052, 5888, 5645, 4011, 2345	0.5725	425	0.5616	425	0	0	3	6
TBX20	AGGCTGGTCAGCTCACCCAG, ATTGCCGCGCTCATGTCGAG, GCCGCCGCTCGACATGAGCG, GCCGCGCTCATGTCGAGCGG, GGGTAGCCCAACTTACCCAG, GGTACCTCTTGTTGTCCACA	6	5205, 3813, 2348, 575, 4689, 6347	0.5732	426	0.5621	426	0	1	4	6
ARID3A	ACAGCTCTACGAACTCGACG, CCTCCTCCTCATCCTCCCCG, GGAGGAGGAGGAGGATTACG, TCACAGCTCTACGAACTCGA, TCTTGTTGATGACCTCCACG, TTCAGCTTCATGCAGAAGCG	6	2170, 8110, 7091, 3556, 3720, 2349	0.5735	427	0.5624	427	0	0	4	6
HR	ACGCCCTTCACTGCACCAGA, AGAAGGAAAGGGCAGTGCCA, GAGCAGTTTGAATGTCCACG, GCAGGCTCTCCCAGGCACAG, GCTGGCCCGCAGAATGCCAG, TCGACCTCAGGGCAGCCGCG	6	2351, 4443, 4283, 1843, 4404, 4250	0.574	428	0.5626	428	0	0	6	6
APPL2	AATCTCATGTGTCAGCCCAG, ACACAACTCACAGCAAAACA, AGTCGGAAAAGAGGTGGCCG, GCTGCAGTACAGAAAGCAAA, GGAGAGGTGCTGCTTCCGCC, GGCACAGTAGTACTGAAGGG	6	4986, 1565, 2663, 4820, 3812, 2352	0.5742	429	0.5627	429	0	0	6	6
ZCWPW1	CTCTGGGGAACTGATCCCCG, CTTAGATGTCCTTATCTCAG, GATCAGTTCCCCAGAGACAG, GCAAGCAGAGAAGAAAGAAA, GGAACAGGAGAAAAAAAGAA, TTAGGGGAGTTAGGGCTACA	6	2353, 4163, 2580, 8108, 6096, 1522	0.5745	430	0.5629	430	0	0	4	6
PIF1	CCTCTTCACGCGTTTCGCCG, CTGATGGTGACGAAGTCGCG, GAAACGCGTGAAGAGGCGCG, GCGCCAGGCCCTGCGCACCG, GCGCGCAGAGGAAAGCAGCG, TCAGCTCCTCCACAGCCACG	6	3541, 2347, 3093, 3307, 2367, 4309	0.5779	431	0.567	431	0	0	6	6
ID3	AAGGCGCTGAGCCCGGTGCG, ATGTCGTCCAGCAAGCTCAG, CGAGGCGGTGTGCTGCCTGT, CTCCGGGTACCAGTTCCCGC, GGTGCGCGGCTGCTACGAGG, TGGCCAGACTGCGTTCCGAC	6	2970, 2369, 1151, 7146, 6786, 2488	0.5784	432	0.5673	432	0	0	4	6
KIAA2026	AATTTCTCCAATTTAATCCG, AGAGAAACCAAGGAGTCCAG, ATAACTGTGCTGAAAAACTG, CATGTACCTCAACAAGGCGT, GCATTTCTACCTGTGGAAGG, TCTTTCTCCAGGATATCCAG	6	6029, 4164, 1788, 2371, 2373, 6009	0.5789	433	0.5679	433	0	0	4	6
PIWIL4	AATGGCAAACCCAGGCCAAA, CATTCTACACACCAATGGCG, GCAGAGCTCAGGTATCAGGT, GGTGCCATCCCGCTTCTGAA, TGTCCATGTACCAAATTGGA, TTGTCAAGTGAAACTCAAAG	6	2374, 5253, 3349, 3631, 4928, 1019	0.5796	434	0.5689	434	0	0	5	6
RBBP7	ACTGGGCCACTGAAGAGCAT, ATTACATACCTGGTTTAGCA, TCCCATTGTGACAGTGACAA, TGATGAGCAGAATCATCTGG, TTAAGAGGTCACCAGAAGGA, TTATGACCCATGCTCTTCAG	6	4289, 2381, 2866, 5612, 1869, 2377	0.5803	435	0.5705	435	0	0	5	6
SKIL	ATAAACCCTGACATTTGCCT, CATTCAATGCCCCATCCTGT, GCGAGCTCTGACTACTTAAA, GTACCTTTAAGATATGAAGC, GTTCTGTGGAGCTATCTGAA, TCAGGCTGAACATAAAACTG	6	2380, 4216, 1425, 4435, 3504, 4621	0.5811	437	0.5714	437	0	0	6	6
ZFP57	CCACAGGTGTAGCAAAAAAA, CTGTCTAGATGCCAGCCAGA, GGTAACCCAGATGGACGCGG, TCACAGAGCGTGCAACAGAA, TGTACAGAAGACGCTCCCAT, TGTGGCAGTGAATTTCACCC	6	3640, 6591, 3020, 1671, 2386, 6390	0.5825	438	0.5726	438	0	0	4	6
RAG1	CTTCCTCTTGAGTCCCCGAC, GAGCGTCTTGAATTCCCTGA, GCATTCCGAAGGGCATGCAA, GCTTACAGTTGGTCTCCACA, GGACTGTGAAAGCCATCACA, TACCTTCTCAGCATTCCGAA	6	5012, 4261, 1780, 2388, 6429, 4748	0.583	439	0.573	439	0	0	4	6
HELZ2	AGACGCAGTGAAGGAAGACG, CAGCCGAGAGAAGTAGCACG, CGGCACCCTGGGCTTCCGCG, GGTGCTGCAGAAATACCACA, TCACCATGATGTGGGCCGCG, TCTCGTCCAGAAGCTCCCGT	6	2720, 1275, 6992, 2394, 8151, 6695	0.5845	440	0.5743	440	0	0	3	6
TAF7L	CTACTGATCCTAATATAGTC, GGAAAAAAGCAGCTTTACTG, GGTCCCTGATGTCAAAGAAA, GTACATTGAATCTCCAGACG, TAGTCAGGAAAAAAGAAAGG, TTTCTGACATTCTTAAGTGG	6	4915, 7902, 2196, 6794, 2399, 3525	0.5857	441	0.5754	441	0	0	4	6
GLS2	AGGAATCCCCCATAACCCCA, CATGAGCGAGATGCACCGCG, GCACCACCTCAGTGAGGCCG, GGTTTGACTTGGCCAGCTGA, TACTGGACTCTTGGACCACG, TTTGTGGGCAAAGAGCCAAG	6	1223, 2693, 3667, 3817, 2404, 5782	0.5869	443	0.5767	443	0	0	5	6
RNF17	ACAGAATTAATTCCAATAGA, AGAGTGTTCTGGTCTCACAT, CCTGGTGCACTGGATTTCAG, TAGACAACGCTACTACCCAA, TCAGGGCTAGATCCCATCTG, TGGATTTCAGCGGCACCCCA	6	2409, 6245, 2637, 2924, 2269, 5905	0.5881	444	0.5778	444	0	0	4	6
GTF3C2	ACCCCCATGCCTAAGAAACG, CCACAGTCATGTTCCCCACG, GGATGTGTCCTTCTTCACGG, GGTAGGTAATGACATCTCTA, GGTGCTGATGGATACCTGCG, TGGGGAACGACCCCGCCGAA	6	4998, 2038, 8889, 5863, 2412, 2667	0.5889	446	0.5784	446	0	0	4	6
GTF2F1	ACAAAGTCAACTTTGCTACG, GCACTGGGTGAAGATGTAGT, GCTCACTGCCGAGGAGGCCG, GCTGCGCATCCACGACCTGG, GTTCAACCGCAAGCTTCGGG, TCAGCATCATGCAGCAGCGG	6	2422, 6448, 5153, 4987, 7442, 2333	0.5913	448	0.5805	448	0	0	3	6
SNAI2	CTGGGCGTGGAATGGAGCAG, GAAAGAGGAGAGAGGCCATT, GAGTAACTCTCATAGAGATA, GTAACTCTCATAGAGATACG, TTCCACGCCCAGCTACCCAA, TTCTTGACCAGGAAGGAGCG	6	2185, 4423, 6262, 2429, 4855, 3942	0.593	449	0.5822	449	0	0	5	6
AFF1	AATCTGTCACCGAAGCACAG, CATGGGCCGGACATAAGCCG, CTAATGTTGCCAACAGAAAG, GCTTATGTCCGGCCCATGGA, GGAAGCCCACCAAGAGAAAG, TCTGACAGCTCCTCTTTCCG	6	4687, 2430, 6472, 687, 3448, 5301	0.5933	450	0.5826	450	0	1	4	6
PHF11	CATAAAAGAGGAGCCACCGT, GTAAAGAAAGAAATCCAGAG, TCAGGAGTGAAAAGAAAAAG, TCATAAAAGAGGAGCCACCG, TGTACATGATTGCCTGAGAG, TTCCCGATCATCGCTCAAAG	6	3466, 2855, 2738, 5084, 969, 2433	0.594	451	0.583	451	0	1	5	6
KDM4E	ACAGGTCCAGAATTGTTCCC, ATAAAAAGAAGAAAGCCATG, ATATCAGCACCATAAATTGG, CATAAATTGGTGGATTACCG, CCACATGCCAAAGTACAGGT, GGTTGGGTAAAACGTCATGA	6	3549, 1633, 5261, 5476, 2434, 4718	0.5942	452	0.5832	452	0	0	4	6
UBN1	AGAGGCTCAGAAAAAAAGGG, AGCTGGTGAAGAATATCCGA, GAGCTGGTGAAGAATATCCG, TGACAACGACTTGCTCCAGG, TGATGCTTGTCTAAACTGCA, TTTGTGATCTGGTTCAAAGA	6	6402, 2448, 2899, 3436, 2178, 5680	0.5977	454	0.5857	454	0	0	4	6
SETD4	ATCAGAAGACGAAAACTCTG, CTTCCGGCTCCAAACAAACA, GGAAGTTCTGAATCAAGAGG, GGTAAGGCTTCCAAAGAGAT, TCAGCCCTCTTCCTGTACCT, TGAGAGTTGCCTGCTCACCA	6	2621, 2450, 6008, 3751, 3446, 2200	0.5981	455	0.5868	455	0	0	5	6
CENPL	ATACTCTTTGAGATTACTAT, ATTGTTGCTGAAAAGCAAAA, CATTCCTTCTGCATAAACAG, GGAAGATGTTGACCCTCAAA, TTACCTTCTCTATTCTCAGA, TTATCCTGACTCCACCTCGA	6	2452, 2383, 7814, 4479, 7266, 6837	0.5986	456	0.5873	456	0	0	3	6
ZBTB33	AACTCCTTGAATGAGCAACG, GCAACTTTGAGCCAAACACA, GCACAGGTCCAATCTAACCC, TGTGCCACTGTGTTATTACT, TTCTTGTCACCAGAATCAGG, TTTGCCGAGTAATAACACAG	6	2456, 6326, 6329, 2453, 7469, 2240	0.5989	457	0.5874	457	0	0	3	6
NIPBL	ACTGGCTGTGGAGATCTCAA, CCTGAAACCCCAAAGCAAAA, GGAGAGAGTTACAAAATCAG, TCCCCATTACTACTCTTGCG, TGTCATTCCGAAAATCAAGA, TTTGCTTTGGAGTTTCAGGG	6	7082, 4318, 7714, 2461, 630, 4788	0.6008	459	0.5898	459	0	1	4	6
TRIM33	CTATCTGTCTGCATTCTTGG, CTCCTCCTCCACCAGCACCG, GCTTGGGCTCCGCCTCACGC, GGCGGAGCCGCCTCTCACCG, GTATTGCTCCATTAGCAGCA, GTTCAAAGAGGAAAACATGG	6	2474, 3763, 8411, 5355, 1747, 7106	0.604	463	0.5935	463	0	0	3	6
CBX6	CCGAATCCATCATCAAACGG, GCCTATAACGCGGTTCCGCG, GCTGGAGTGCAGCTTGGGCG, GTACAGCACTTGGGAGCCCG, TCAACCGCAAGGTGAAGCCG, TGAAGCCGCGGGAGCCCAAG	6	3906, 1430, 6773, 4457, 2475, 2962	0.6042	464	0.5937	464	0	0	5	6
CDY1	GACGTGACAAAGGGTCCCGG, TGCTGGCAGCAAATAACTTG	2	6259, 3858	0.8161	699	0.5939	465	0	0	1	2
PHGDH	CGCAGCTGAGAAACTCCAGG, GCAAGATCTTCCGGCAGCAA, GCAGTCTGGCCAGTGTGCCG, GCCCAGGCCAAGAATTCCCA, GCGACGGCTTCGATGAAGGA, GGAAGATCTTGCAAGATGGA	6	6984, 5699, 8545, 2479, 1396, 2786	0.6052	465	0.5944	466	0	0	3	6
KIAA0101	ACTAAAGCAGACAGTGTTCC, AGAACCAAGCACCTTTCTGG, CTTCTTGTTTGAACATGGTG, GTTCCAGGCACTTACAGAAA, TGATGTCGAATTAGTGGCAG, TGTCGAATTAGTGGCAGAGG	6	2911, 2489, 5357, 1632, 5167, 3979	0.6077	466	0.5966	467	0	0	4	6
DEK	CATGTTAAAGAGCATCTGTG, GAGAAAGAACCCGAAATGCC, GAGCGAGGAGGAAGAGGACG, GGAAGAGGACGAGGACGACG, TCCCAGAGAGGAGAGCGAGG, TTGATCCTCACTTTGCCAGA	6	2496, 5637, 8278, 8755, 5871, 2072	0.6094	467	0.5985	468	0	0	2	6
MGA	CATCACCAGTAAAATCTAAA, CTATGCATCGTTACCTGCCG, GCTTCTCAGCGAAAGAGCCG, GGTCATGAAACATCAGGCAA, GGTTTGGGAGTATATGACCG, TGAGATTTAGACAAGCCTGG	6	2502, 5933, 1572, 6451, 7095, 8021	0.6108	468	0.6004	469	0	0	2	6
TRIM22	AGAGATGTCTGTGAGCACCA, AGTCAGTGATCATCTCAAGA, CATAGTTGAGAGAGTCAAAG, CCAAACATTCCGCATAAACG, GTCTCCTCCTGCCTTCCAGG, TCAGACAAGAGAGAACCGCC	6	2439, 3145, 2525, 2504, 5656, 5190	0.6113	469	0.6007	470	0	0	4	6
CBX3	AAAATGGGAAAAAAACAGAA, AAAGCTGGCAAAGAAAAAGA, ACACAGTGCTGACAATACTT, ACGTGTAGTGAATGGGAAAG, AGAGCCTGAAGAATTTGTCG, GGCCTCCAACAAAACTACAT	6	1264, 5565, 2505, 7037, 5819, 3747	0.6116	470	0.6011	471	0	0	3	6
SMAP2	ATATGAGAAGAAGAAATACA, GTCTATCTGAGGTCGCCGAA, TAGGTTCCATGCCAACTGCA, TCACAGTGCATGCAAGAGAT, TCTGGAACCGGAAGAAGAAG, TGAACCTGTTTCCGGAGCCA	6	6352, 2694, 1404, 5491, 3387, 2507	0.6121	471	0.6013	472	0	0	4	6
TGFB1I1	CCTCCATTCTCCTCTTCCAG, CCTGGGTGGGAACACCCCGG, CTACCACCTCGCACATGCCA, GAGGGGTGAGAGGCTCCGCA, GCTGGAAGAGGAGAATGGAG, TCATTTGTGGAGCTCACCAC	6	4943, 4714, 2511, 1657, 8267, 6416	0.613	472	0.6021	473	0	0	4	6
SMYD1	ACAGTCTCTGAGATGACAAT, ATACCTGTCAAAAACCACTG, CCTCCCCAAAGTGCTCCACG, GAAGGCACCGGGCTCACGGA, GGACGACTTGCAGAACCACG, TGAGCGGGCTTATTCCGCAG	6	2519, 3562, 4442, 3023, 1181, 5093	0.615	474	0.6046	475	0	0	5	6
GATAD2B	GCAAAGCGACTCAAAATGGA, GCAGTCCTGTTGTCTCCATG, GCCCAGCTACAGGGTCAGCG, GTTTCTTTAACAGGACCAGT, TGGATATGAGTGCTAGACGG, TTGTCTAGTGAGCCAGAGCG	6	3770, 2522, 5572, 1668, 4155, 3482	0.6157	475	0.6054	476	0	0	5	6
DLC1	AAAAGGCTGTCCCATCCAGT, ACTAGTAGCTGACAGCTTGC, AGAACATGTGACCCACTGGA, AGTTTCACCAGCTATTCCCC, TCTGATCCATGACAGCAGTC, TTACGATCATCAGAATTAAA	6	5072, 4844, 2487, 3206, 2523, 3081	0.616	476	0.6059	477	0	0	5	6
TDO2	CCTGAAGTCATTGAAGTCCA, CGACTATTAGAAAACAAGAT, CTTCTTCGCTGCCTTCTACG, GAACAGAATCCAACTCCCAG, GTTCGAGAGATCTTTCAGAA, GTTTCAGGATCACTGACACT	6	4586, 3163, 1164, 5591, 2524, 4660	0.6162	477	0.606	478	0	0	5	6
NCOR2	AGAAGGCTGAAGCTGCACAT, GCATCGAGAACAACCCCCGG, GCTCTGGGCTCAGTTCCGGG, GGAGGAGCAGAAGCCCCCCG, TGATACTGCCGGGTGTCGGA, TGGTGATCTCTCGGTCCACG	6	2527, 1014, 4989, 6942, 2714, 6938	0.6169	478	0.6067	479	0	0	4	6
PARP2	CAGAGTGTACAGCCAAGGTG, GATTGCCTGAACAAGCCACC, GTGAAGGCCTTGCTGTTAAA, GTTTGGATGAGATGGGGCCG, TATTAGAAGATGATGCCCAG, TCAGCGTTCGAATTCCATGG	6	5015, 2862, 763, 2530, 4356, 3235	0.6177	479	0.6077	480	0	1	5	6
NFE2	AATCTGGGTGGATTGAGCAG, AGTTGGGCATGAGTGAGTAG, ATATGTAGAGATGTACCCAG, GCTCTGCTGGGGAGGACACG, GCTGAATCTCTTGAGCTGGA, TCCCCAGCAGAGCAGGAACA	6	2535, 5385, 5163, 5650, 6413, 1951	0.6189	480	0.6098	481	0	0	2	6
MED27	AAATGTCAGTGTGAACCTGG, ACTGCCTGAAGGATGGGATG, CTGTGGCGGCGGCAACATGG, CTTCCAGGACAACTTACATT, GCTGCGCTCCAGCGTGAGCA, TGTTCCGCATCCCATCCTTC	6	2442, 5810, 3553, 3217, 2538, 5378	0.6196	481	0.6108	482	0	0	4	6
FGF2	ATTAGCGGACGCGGTGCCCG, CCCGAGCCGCTGGAGCCGCG, CGGACAGAAGAGCGGCCGAG, GCCTCCCGCCCGGCAGCGCG, GGGGACGGCGGCTCCCCGCG, GGGGCCGGCGGACAGAAGAG	6	2906, 6208, 2539, 3766, 916, 3368	0.6199	482	0.6111	483	0	1	5	6
DDX17	ATCGGGGCTACAAAGCCGGT, CCAACTCCAATTCAGTGCCA, GCGTAGCCAAACCTGCCCAC, GCGTTTGCGTAAAAAAAAGT, GGATTACCAAATTTCTTCGG, TGGAACATCCGGAAGTAGCA	6	7355, 8244, 2551, 1491, 7010, 7375	0.6228	483	0.614	484	0	0	2	6
TRERF1	GACCATCCCGTGTATCTTGA, GCAGCCTCCTTCTTATCACA, GCTGCTGTCTCAGAAGCCCA, GGAAACCATGTCCAGCTACG, GGTTGGGGCTGATAATACTG, TCGGGCAGCACCCTACCCAA	6	2553, 3285, 4326, 3832, 2229, 3329	0.6233	484	0.6143	485	0	0	6	6
CTCFL	CAGCAGAGTGACCGTACGGA, CCATGTCCGATCCCACACTG, CTGCCTGAAAACCTTCCGTA, GTGCAAGTATGCCAGTGTGG, TCCGCAGCAGAGTGACCGTA, TTGCACATGGAACATTTAAA	6	6311, 5197, 2556, 3950, 2647, 2537	0.624	485	0.6151	486	0	0	4	6
UBP1	GCACACATCACATACTGAAA, GGAAGATTCCAGCCTTCCAT, GTACCTCATGCTGTAAGCGC, TATTCCACAGAGCATCATAA, TTAAGCCTAAAGGTGCAGAC, TTTACTCCACGGAAGCACGG	6	4888, 6541, 3847, 2557, 1003, 3013	0.6243	486	0.6153	487	0	0	5	6
GFI1B	AATGGGGGTGAGTCGGACAG, CTACAAGCCTAGCTTCTCCT, CTATGGCCACAGCTACCGGC, CTTCCTGGTGAAGAGCAAGA, GGAATAGAGTGCTAAGGACA, GTAAGGGCAGGAGGCCAGAG	6	2568, 3190, 6593, 709, 4079, 8957	0.627	487	0.6184	488	0	1	4	6
HLTF	ACAGTCTGAAACTAAAGGCA, GGTTGGACTACGCTATTACA, GTTGGACTACGCTATTACAC, TCTCAAACTTCCAAATAAAA, TTAGGATTCAATTTGGAAAG, TTTCGCTGTTCCCAGAATGG	6	861, 5475, 4565, 8599, 4236, 2575	0.6287	490	0.6206	491	0	1	4	6
ARID5B	CCCTGCCTCCAATCAAACCT, GAATGACCGTACCTTGGCAA, GTACCCGCAGACATTATGAA, GTCTCATTCTGGTTTGCCAG, TTACAGTTATGGTTATTCTT, TTGCCCCTAGAGTAGAGCAG	6	2577, 2945, 1725, 3098, 3969, 6532	0.6292	491	0.6216	492	0	0	5	6
BRD3	CTACTGCGACAGCATCCTCA, CTTGGGGTCTGACAACGGCG, GATGCTATCCAAGAAGCACG, GCATCCACTGGCTTGTAGAA, TCTTGGATAGCATCTCCCTG, TTATTACCCCCTGCTCCAAA	6	5587, 1016, 2581, 3775, 4821, 2979	0.6301	492	0.6225	493	0	0	5	6
RNF2	ACAAAGAATGTCCTACCTGT, CCCTTGACTAGACTGCAGCG, TCATCACAGCCCTTAGAAGT, TCTCAGGCTGTGCAGACAAA, TTACAGGAGGCAATAACAGA, TTCAACATACCCACTTCTAA	6	2925, 2588, 3857, 6980, 6387, 1994	0.6318	493	0.6244	494	0	0	4	6
DPF1	AACGGTATAAGAACCGGCCG, CCACCGATCTTGTACTCGCA, GAAACGGTATAAGAACCGGC, GTACGTGTAAATCTGTCCCG, TGGAGGATGACATTCCCAGG, TTTCTTCCTCCAACAGCGGG	6	2589, 2301, 3778, 6111, 3051, 2619	0.6321	494	0.6249	495	0	0	5	6
BCORL1	CTGAAGTTAGTGGTAACCAG, GCAGTGCTACAGAAAAACTT, TCCCGCATCTGACAGCGCCG, TCGCATGTGTGGCATCAACG, TCTACAGCACCGCTCTACAG, TCTCTTTGTGGAAACCCACG	6	5351, 5007, 1168, 2691, 2593, 8877	0.6331	495	0.6262	496	0	0	3	6
BIRC2	ATATTCAACTTTCCCCGCCG, ATGATGCTATGTCAGAACAC, ATGCTATGTCAGAACACCGG, CAACTGCTCTAGAATTAAGA, CATGGGTAGAACATGCCAAG, CCTTTCTGAGACAGGCACCC	6	3047, 889, 4576, 2615, 3353, 7980	0.6384	496	0.6324	497	0	1	5	6
MBD3L2	CCATACTCACCAGAACAGGC, CTTGGAAAAGAGGTGAACGC, GATCCCATACTCACCAGAAC	3	4822, 4192, 8238	0.7376	613	0.6338	498	0	0	2	3
CD1D	AGTTATTTGAGGCGTTCCCA, CAGCGCTTCCCCAAGCCTGG, CCAAGGCTTCAGAGAGCGGA, CGAGATCTGGAGGCAGCGGA, GCACAGCTGGAGCAACGACT, TTATCGAAGCAGCTTCACCA	6	2623, 698, 3380, 4348, 7390, 3043	0.6404	497	0.6347	499	0	1	5	6
RPS6KA5	CTGAAGGTCCTAGGAACTGG, GCCGTCCGCGCTGGTCCCCG, TACCTTGTGGAGATGTTCGA, TCACTGTCAAGCACGAGCTG, TGCCCTCGAACATCTCCACA, TGGCACCAGATATTGTCAGA	6	3909, 5335, 2029, 2625, 3033, 3232	0.6409	498	0.635	500	0	0	5	6
PCBD1	ACAGGCTGAGCGCTGAGGAG, CACTCTTGTCATGAACCCAA, CATTCCACCCCACAGCCCTC, CCAGCTGCTGCCAAACCTGA, TCATTTCAAAGACTTCAACA, TCTAGGCTGGCAAAGCACAC	6	7331, 1300, 2743, 2633, 4946, 2627	0.6414	499	0.6359	501	0	0	5	6
ACTR5	CATGCAGAATCTCCTCCATG, CTGAGGAGAAACAAGAAAGG, GCCGCGCCTGCAGTTCCGCG, GTACCGCTGGTGCTGGACAA, TCATTTGCCGTGAATACAGT, TGAGTGCTACGGGATTCCCA	6	4752, 4241, 2639, 694, 4105, 5459	0.6443	500	0.6386	502	0	1	5	6
KMT2E	ATAGCTCTGAGATTAGGCAA, ATAGTGGTTATGAGACCAGA, ATGAGGCTCGATTCATCAGG, GGATCTGTAGTTATGCGTAG, TAAAAGAAGGAAAAAAAGCG, TGGATTTCTCAACTACCACA	6	1301, 3886, 5763, 2640, 7394, 2888	0.6445	501	0.6388	503	0	0	4	6
TANC1	ACTGGCAGAAAACAGAGGCG, CTAAGATTAGGGGTTCAGAA, GCACGCCTACGTCCAGCACA, GGATCGGCTACAGCACCGAG, GGTGCTGTAGCCGATCCACA, TGTGCTGAAGAAGAGCCGAG	6	808, 2641, 3105, 3153, 5023, 6342	0.6448	502	0.6389	504	0	1	4	6
ENY2	AACCAAAAGTTGATAGAAAC, AGAGCTAAATTAATTGAATG, CTCCAGTTTCTATCAACTTT, TAGAAACTGGAGAAAGAGAA, TAGCTCTCAGCAACTCTTTG, TGGCTGGAAGGATCAGTTGA	6	2515, 5247, 2642, 7959, 6249, 8041	0.645	503	0.6395	505	0	0	2	6
KDM3B	CTACAAGAGATATTCAGCCG, CTACAGTGTTCAAGGTCACA, GATGGAGGTGAGGCAAGCCG, GGGTGGAGCCGAAAACAAAG, GGTTCCTGTCAGATGCCAAT, GTAGAGTGGTGAGATCAAGT	6	6745, 2643, 5753, 854, 5502, 7293	0.6453	504	0.6398	506	0	1	2	6
NEUROG1	ACGACGAGCAGGAGAGGCGG, AGACTGTGCCAGACTCCAAC, CCGCATGCACAACTTGAACG, CGGAGATGCAGGTCTCAAGG, GCTGCTGGCGCAGTCGAGGT, TCTGGCACAGTCTTCCTCGT	6	3433, 5520, 1406, 2651, 6057, 5097	0.6472	506	0.6417	508	0	0	3	6
POLR2H	AATACTTACCCAAGTCTACA, CAATACTTACCCAAGTCTAC, GCTAGTACCTTGTATGAAGA, GTTGTATTCACCATCATCCA, TGGAAGGCCTATCATCAGTG, TTCAGGTGACAAGTTTCGGT	6	4520, 2465, 2660, 5299, 7016, 4159	0.6494	507	0.6445	509	0	0	4	6
APBB1	AGGAGGAGAAGCTTCCCCCA, AGGCTGGGTAGAGATGACCG, ATTACTGGCACATCCCAACA, GCCGGGCCTCCCCCTCACAG, GGACTGAAGGAACCTGAGGA, GTGCCAGTAATAGGTCCCTG	6	3815, 5495, 2284, 3995, 2666, 4696	0.6509	508	0.6462	510	0	0	5	6
PER1	CGACTGCCGCCAGAGCGCCG, CTTACGTGCGTACTTTGTGG, GATGTGCTCCAGCTCCTCCA, GCTCTCAGTGGTCTCCAGCA, GCTCTGAGCTGGCACTCAGG, TCTGCAATCAGCAGGCAGCA	6	4205, 3827, 736, 2673, 6692, 4473	0.6526	509	0.6482	511	0	1	5	6
SRSF5	AGTGGCTGTCGGGTATTCAT, CATCGGGAGACTAAATCCAG, GAGGTCTGCGACTACTAAAA, GATTCTTCAAGGGATATGGA, GCAGACCTCGAAATGATAGA, TTAGGAATTTGAGGATCCAA	6	2730, 4674, 6626, 1246, 2675, 4585	0.6531	510	0.6489	512	0	0	5	6
SPEN	CGCAAGGCATGAGTTCCAGG, GCAGATTTATGGAGCTCACA, GCAGCATCTAGAGAGAAAAG, GGGAATAGCGAAAAACCGCC, GGTACACAGGGATATCTACA, TCAGCACTAGAGAAGACCAC	6	3548, 4361, 6815, 2676, 1486, 5953	0.6533	511	0.6493	513	0	0	4	6
GLUD2	CCTGCTCCAGACATGAACAC, CGAGTTGGTGGCCGACCGCG, GCAGCGCTTTGGCCAGGTAG, GGCCAGGTAGCGGTACATCG, GGCCCAGCAACGCGGCCGAG, GGGCTCCGCGGCCAACCACT	6	5610, 3038, 2677, 1267, 3752, 4491	0.6536	512	0.6496	514	0	0	5	6
MBD5	ATACCACTAGAAGTGGCCTG, ATAGGGTCAAGAATGCCAAG, ATTTGAGGCCCCACAACCCG, CCAGCTATACAAGTTCCTGT, CTATATGTACAAGAACTGCC, TGTACAGTCATCCTGTGCAA	6	3584, 4659, 2665, 2679, 2933, 3485	0.6541	513	0.6503	515	0	0	6	6
JADE3	AGCTGAGTACCCCCACCACA, CCTTCCATGTATCAGCAAAG, GAGCAGTGAATATACTTCCG, GGTCTCCAGACAGTGAAGAA, TCTCCCACATCCCACCCAGT, TCTTACCTCTGGGATCCACA	6	5278, 2687, 3346, 3495, 2579, 7553	0.656	514	0.6532	516	0	0	4	6
ASXL1	ACAGGAGTCAGAACAAGCAG, AGAGGAGTCAGGACAACTCG, GACTCCTCTGAAGGTAAACG, GAGAGTTGATCAGGGCACGG, TACCTGATGCAGATTCCACG, TCACCACTGCCATAGAGAGG	6	4317, 5359, 2695, 2393, 4024, 6036	0.658	515	0.6558	517	0	0	4	6
TOP1MT	AATGAAGACGAGACAGCGGG, GCAGCTGGACGTGCTCCACG, GCAGGAAATGAGAAGGAGGA, GCTCCGATAACACCGTCACG, GGGCTGCTGTTCCCTCCGCG, TCATGAATACACAACAAAGG	6	2698, 5684, 5410, 4086, 1916, 5616	0.6587	516	0.6567	518	0	0	3	6
KCTD1	CTTTCCATCTCCAACAACAT, GCAGGGGATCTAGTGATCAG, GCATCTCCACTGAACAACCA, GGTTGTTCAGTGGAGATGCA, GTTGTTCAGTGGAGATGCAG, TGTGGCCGCCCACATCAATG	6	3172, 2699, 2622, 2755, 4045, 3865	0.6589	517	0.6568	519	0	0	6	6
AGXT2	AAGAGGCTCAGGAAGAAGTG, CATCTCAAGGATCCTGGGAG, GCAGTGGCACAAAAGCAGCT, GCGGAAGTGACCAGGCACAA, GTTGGCAACCTGTCCCACCA, TCAGGCATGAAGTCACATGG	6	5045, 2034, 2701, 3673, 3167, 3636	0.6594	518	0.6574	520	0	0	5	6
SAP130	AGATTCTGAAGTCAGTGCCA, AGTCCCTCCGAAAATGAAAG, CAGTTGCTACCACAGCAGGA, CCAGTGGGTATGCAGAAGGG, GGAGCTTCTCATTTACCTCG, TGGAAACCCGAAGTGACAAC	6	1647, 2702, 7373, 7757, 6900, 4395	0.6597	519	0.6577	521	0	0	3	6
HAT1	CTTTAGATGCATATTCAACA, GGTAGAATATAAGAGTGCAG, GTATACCCATCAACTCTTTG, GTATGAAGTAAGGTTCCGAA, GTGTTTGTGCAAAATCCAGG, TCAGTTCTCAGTCCAACAGG	6	2703, 2930, 1953, 3715, 5848, 4000	0.6599	520	0.6578	522	0	0	5	6
ATF3	AGAACAAGCACCTCTGCCAC, AGTGACTGATTCCAGCGCAG, CCTTTGTCAAGGAAGAGCTG, GGCAGAAGCACTCACTTCCG, GGTGTCCATCACAAAAGCCG, TTTGTGATGGACACCCCGAG	6	2705, 6377, 4582, 3265, 2478, 5941	0.6604	521	0.6581	523	0	0	4	6
NEUROG3	CCAGCCCCACTCGCACACGG, CCGTGCCCGGAGCTTCCTCG, GAGGCTGCCGAGGGGCCCCG, GCAGGTCACTTCGTCTTCCG, TGGACAGTGGGCGCACCCGA, TGTCCAAGTGACCCGTGAGA	6	5139, 2213, 8500, 2707, 5030, 5188	0.6609	522	0.6585	524	0	0	2	6
HIST1H2BF	AAAAAAGGGCTCCAAAAAGG, ACACGGAATAGCTCTCCTTG, TAGCACCTTGTACACGTACA, TCCGCTCCTGCTCCAAAAAA	4	6185, 7366, 3898, 1551	0.7055	576	0.6587	525	0	0	2	4
PRMT8	ACTCGGGACACTTTACCTCG, CATGTTCGCTGCCAAGGCAG, CCAGTCATCACCATATTTAA, CTATGAGTCCATGCTCAACA, GCACGTGTTCAAGGACAAAG, TGCCCACTTTGGGATCCACG	6	3403, 2946, 2977, 1458, 2708, 2912	0.6611	523	0.659	526	0	0	6	6
MSH6	CTTCAGAGTCTGATTCCATT, GTAAGCGGCTCCTAAAGCAA, TCAGATTCCCTGGTGCAGAA, TCTTAGCCTCAAAGAAAAAG, TTATTGGAGTCAGTGAACTG, TTTATAGCCCTTCTGCACCA	6	2709, 4330, 3623, 2268, 4807, 3670	0.6614	524	0.6591	527	0	0	6	6
ZFPM2	ACACACAGTCAGAGAAACCG, ACTGCAGTAGTACATCAAAT, AGTCGACAGCAACTTCCAGT, GCACAGGCTGGAAATCTGAT, GTCAGATGACTCTCACAGAA, TTTCCCCCAAGATATCACCA	6	2886, 1746, 2711, 3288, 3220, 5413	0.6619	525	0.6596	528	0	0	5	6
TAF11	AGCTGCAGCGGAGGAAGGCG, AGTTTCCTCTGGGATTCCAT, CGACACCGATGGAATCCCAG, GGAATCCCAGAGGAAACTGA, GGACTTGAAAGAAGCTGCAG, GTCTCTCCACCTTTGTCGGA	6	4910, 4433, 6332, 2804, 2712, 941	0.6621	526	0.6599	529	0	1	5	6
ATN1	ACTGGGCCCCAGTAGAGGGA, CTTCCTCTTCCACTTCTCAA, GCTAGCCTCTGGCTGTCGAG, GTAGGGCCTCAGAGACCCCA, TCCAAGCTATCCAGATCGGA, TGTCCTGGTCGATATCCCTA	6	2719, 2612, 8487, 6442, 7005, 4244	0.6638	527	0.6619	530	0	0	3	6
ID4	ACTGCTATAGCCGCCTGCGG, CTGTAAGGCGGCCGAGGCGG, GACGGCGCCTTGCGGCCCGA, GGCGGCAGCGCGCTGTAAGG, GGGTGGCTCCGCAGCCGCGG, TCCCCGCCGCCGCAGCCCGA	6	2727, 6650, 766, 5431, 4126, 5667	0.6658	528	0.6636	531	0	1	3	6
CBX7	AGAGAGGTCCGAAACCCAAG, CTTCTTCCGGATGCTCTCCA, GCATCCGGAAGAAGCGCGTG, TCAGGGCTCCCGCTGCCGAG, TCTCCCCAGGTACAGCACGT, TCTCCTCGTAGGCCATGACG	6	1719, 3533, 2735, 4135, 5189, 7248	0.6677	530	0.6659	533	0	0	4	6
PRKAA2	AGAAGCAGAAGCACGACGGG, CGGATCTTCTTAAATAACGT, GCTGAGAAGCAGAAGCACGA, GGATATAAAAGACACCCCCT, GTTATTTAAGAAGATCCGAG, TTGAAGAGATGGAAGCCAGG	6	5936, 5291, 1710, 2736, 4832, 6205	0.668	531	0.666	534	0	0	3	6
PQBP1	AGAGGAAGAGATCATTGCCG, CCCACATGACCCCAACTCCG, CCTTGTTCTACCAGAACCAG, CGATGATCCTGTGGACTACG, CTTGGCCGATTTGGTAACCA, GGATGCCTCTCTTGGCCAAG	6	5985, 6126, 2576, 4449, 4185, 2745	0.6702	532	0.6679	535	0	0	4	6
ZNF224	AGAACATCAGAGAATCCATA, AGGACATCAAGCATTCCACA, GATGAAGACAGCAATCCAAA, GGAAGTGGAAAGTATCCCTG, TATTCATCAGAGAGTCCACA, TCACACGTATCACATCGGAA	6	768, 3871, 2746, 3210, 3075, 4170	0.6704	533	0.6683	536	0	1	6	6
SMARCD2	CATGGGCCCCGCGGGCCCCG, GCAGCATGCCGGGTCCCGCG, GCGATAGTGCAGGAACTGCA, GCTCACCTGGTACTGCGCCG, GGCTTCCTGGGAACTCCGAG, TCACCTGGTACTGCGCCGCG	6	2749, 2768, 3897, 1262, 4880, 5182	0.6711	534	0.6696	537	0	0	5	6
PARP4	ACATCCAGAAAAAGAAAGCG, AGTTCCCAGAGGCATCCTGG, ATATCTGCAAGACATCCACT, CCTCCATGCCATCATCCAGG, GGAGGTGGTGTGATGTCCAG, GGTGTGCAAAGAACAGACGT	6	1998, 4543, 5678, 2754, 6344, 6590	0.6724	535	0.671	538	0	0	3	6
NOTCH2	AACCCTTCAGACACTCACAG, AAGTGTATCGATCACCCGAA, ACTGCCCATTGTTCACACAA, CCGACTGCAGAGATTCACCA, GCAGCGCCCACAGCAGAGCG, TTTCCGCTGTATATGCCCCG	6	5525, 2115, 5277, 5532, 2760, 7165	0.6738	536	0.6724	539	0	0	2	6
CDK19	ACGGTCACGTCTACAAGGCG, AGGATTTGTTTGAGTACGAA, CGCCTTGTAGACGTGACCGT, GAAGGGTGCAAAGTGGGACG, GTCACGTCTACAAGGCGAGG, TTTCAAGGCGAAGCTGGCGG	6	1367, 3729, 2959, 5659, 5884, 2762	0.6743	537	0.6727	540	0	0	4	6
NASP	AGAAACTGAAGGCTCAGAAG, AGCCACTGCCGCCGTCGCCG, CATCTGCAGATAAAGTGGAG, CCACAGTCCCGCTTACTTGT, GCCCAGGCACATCTTAAACT, GTCGGCAGAAACCAGCTCCG	6	5795, 4856, 3818, 6022, 2765, 1639	0.675	538	0.6741	541	0	0	4	6
HIF3A	AAGAGTACACTCACCAGCCG, GCAAGGGCCAGGCAGTAACA, GCGCACCCTCAACCTCAAGG, GGCCCCACGCACCTTCCAGG, GTGTTGCTCCGTTTGCTCCA, TCTCGCAGACCCATTCAGCG	6	3985, 3129, 3546, 4572, 2771, 1072	0.6765	540	0.6757	543	0	0	6	6
CBX1	ACAAAACAAGAAGAAAGTGG, AGAATCCCTTCCACTTTAGG, CATGAGACAGATAAATCAGA, CTTTGCCCTTTACCACTCGA, GGAGGAAGAGGAATATGTGG, TTTCAGTGAGGACAACACAT	6	4416, 6044, 8015, 2778, 7988, 2688	0.6782	541	0.6775	544	0	0	3	6
RPE65	CACTGGGTAGACATTAACAA, CCCGTACGTAAGCATCAGTG, GCAGGGATCTGGGAAAGCAC, GCTTGAATCGGTCACTGCAG, GTAAACTCACCTGCTTGCAG, TGTTAATGTCTACCCAGTGG	6	2779, 3925, 8169, 2731, 2795, 7827	0.6785	542	0.6776	545	0	0	4	6
SMAD4	AGATGGGGCTAACAGAGCTG, AGTCCTACTTCCAGTCCAGG, CAGCCTGCCAGTATACTGGG, GGATTAACACTGCAGAGTAA, GTCGATGCACGATTACTTGG, TCTGCAACAGTCCTTCACTA	6	2725, 2780, 3722, 3356, 6314, 3765	0.6787	543	0.6776	546	0	0	5	6
TAF4B	ACTTGTACTGAGGAAGGCTT, GCCCCTCCTAAAGTCAGCAG, GCCGCTGCTGACTTTAGGAG, GCCGGCCTCACCGAACCCGC, GGCCATGGTCACGGTCCCCG, TCTGCATTTCCAGAAAAGCG	6	2257, 3768, 5611, 7385, 2799, 3378	0.6833	546	0.6812	549	0	0	4	6
JAZF1	ATTGGAGAAGAAGGAGGCGG, GACAGAGTCAGCGAGAGCTT, GCAGGTATTGGAGAAGAAGG, GGTATTGGAGAAGAAGGAGG, TTAGGGACTCCTGCTCTCGG, TTATTACAGATACAGATCCA	6	8360, 7270, 7969, 9053, 1167, 2800	0.6836	547	0.6817	550	0	0	2	6
DHTKD1	AGAAAGACTGGTTTGCCAAG, ATACCAACGCCAGTTCCGCA, CCTGGAGGCCGTCAACCCCG, CGAGTAACCTTACCTCTGGA, CTGATGTTCCGTAAAATGCG, GTAGCCGTAAACGCCCCGCT	6	2398, 2803, 4840, 5120, 3354, 7117	0.6843	548	0.6821	551	0	0	4	6
RFX5	AATGGTTTAGAGAACCCAGA, CCGTGCAGAACAAAGTAGAG, GCTAAGAGCCCCAAGACTGG, GGTTTAGATGACCGTTCCCG, TGTCAGTGTGCTCTTCCAGG, TTTAGGTCAAGTCCAGGCAG	6	2807, 5115, 4412, 962, 4301, 2889	0.6853	549	0.6833	552	0	1	5	6
MIER3	CCTTATCTTGGAGAGTACGA, CGAGGAAACTCAGTCTTCTG, GAGAAGTTCATATAATGCCT, TAAAGGTACCAATATGGCGG, TCGTACTCTCCAAGATAAGG, TGATGGTGATAAGGAATCAG	6	6033, 4355, 2060, 5526, 4641, 2815	0.6873	550	0.6857	553	0	0	4	6
PHF19	AATTATCTTCGAAAGTCACG, CTACCTCGGGAAGATCAAGA, CTTGATGTCCAAACTGACGG, GTTGTTCTTGACCTTCGCCA, TTACCCTCTTGATCTTCCCG, TTGATGTCCAAACTGACGGA	6	6496, 2820, 5930, 4041, 2813, 6495	0.6885	551	0.687	554	0	0	3	6
UBE2V1	CAAAGCAAACTGAGTGATGA, CCTAGAAAATTTCACTGCAA, GTAACAAAAATTAATATGAA, GTTACAAATCTTACAAAGGG, TGTTACAAATCTTACAAAGG, TTTGTTACAAATCTTACAAA	6	2184, 2824, 4792, 8036, 7637, 4214	0.6895	552	0.6879	555	0	0	4	6
PHF1	ATTCCAGGTGGACAGTGCTA, CAGAGCGACAGACACAACAG, CTCTCATTACTCACTCCCCA, GAGGAGTTCCTCTCCAGGGA, TCTTGACCCTCCCAAAGCCG, TGTGCCCTCTCCCTCTCCAG	6	4730, 4570, 2827, 1412, 6687, 8044	0.6902	553	0.6891	556	0	0	4	6
ANP32B	CATGAAGAGGAGGATCCACC, CCTGGACCTCTTTAACTGTG, GGAGCTGAGGAACCGGACCC, GTCTCTGCTTACAGCTGCCG, TCAAATGATGGAAAAATTGA, TCCGGTTCCTCAGCTCCAGG	6	4243, 3478, 2828, 5500, 533, 4959	0.6904	554	0.6896	557	0	1	5	6
SPIN1	CAGCCTACGATGTTCCGCCG, GCAGCCTACGATGTTCCGCC, GGAATGGCCCTGTTACCCAG, GTAGGCTGCAGGATTCAGCA, TGGCCAGGTGTCTTTCCGAA, TGTGTGAATACAGAAAACAT	6	5044, 5655, 1460, 2836, 3521, 3253	0.6924	555	0.6913	558	0	0	4	6
WWTR1	ATCCGAAGCCTAGCTCGTGG, CAGCCAGTCGAGGCCCCGGG, CCTTAAAGAAAGACTCCGGC, GCAGAAGATGAATCCGGCCT, GGCTCCTTAAAGAAAGACTC, TCCAGCACCGACTCGTCGGG	6	5422, 5993, 7588, 2563, 7431, 2837	0.6926	556	0.6914	559	0	0	2	6
JAK2	ATAATCATACCTGAGCAAAG, ATCTGCCTCAGATTTCCCAA, CTGCCACTGCAATACCAACG, CTTACGATGACAGAAATGGA, GAGGTGCTACTTCTTTACAG, GCTTATGGATAGTTACAACT	6	3793, 4076, 2838, 2495, 3386, 3358	0.6929	557	0.6916	560	0	0	6	6
SCAI	CACAATATGGACAGAAGCAG, GCGATTCGATGTGATAACAA, GCTGAAGATGATATCCCACA, GGAAGTTCCAGCAGCAGCAT, GGAGCCCCATTGCTGGAACA, TTATTCTCAAGTCAATAAAG	6	3957, 6418, 2839, 4672, 5967, 955	0.6931	558	0.6918	561	0	1	4	6
CENPI	ACATGGACAAAACAATCCAG, AGTCACATACCTCTAAGCAA, CAAGTGTTCTGGTAGCACCA, GCATGTTCATAATCTCCCAC, GCCGTGAAGCAAAGAAACCG, TTATTCTGTGAAGCTTTAAT	6	7252, 8012, 8141, 2841, 6859, 875	0.6936	559	0.6923	562	0	1	2	6
E2F1	ATAGCGTGACTTCTCCCCCG, CACAGGTGTGAAATCCCCGG, CCACAGGTGTGAAATCCCCG, GCAGCAGGTCAGGGTCGCAG, GCCGGCTCCCACCGGCCCCG, GGAGATGATGACGATCTGCG	6	4974, 5974, 2844, 5584, 3558, 2104	0.6943	560	0.693	563	0	0	4	6
EP400	ATCAGTTCAAAGCTGCCGAG, CCTTGAAGTGGGTCACCAAG, GCTGAAGCCATCCTGCCGAA, GGTGTCCTCTCGAAGCCCAG, GTAACACACAGACCTCTGCA, TGTCTAAGAAAAAGATACCG	6	5760, 2740, 2846, 7694, 8344, 7886	0.6948	561	0.6931	564	0	0	2	6
ATAD2	AGAGTCTTTCCAGTTCCAGG, CGCGGCGCAGAAGAAACCCG, CTATAGATCCTGCTTTACGA, GATTCTAAAGATTCACACCA, GGACAGGTCCAAGGAGCCCG, GGAGCTGCACAACCACTCCG	6	2850, 4218, 3927, 2726, 3580, 5633	0.6958	562	0.694	565	0	0	5	6
HMGN2	ACTTACAGCAGACAACCTCG, AGCCACAGAGAAGATCCGCG, ATAGGCTGAAGGGGATGCTA, GCGCCACGTACCTTTCTCTT, GGGAGATAAAGCAAAGGTGA, TAGGCTGAAGGGGATGCTAA	6	2481, 7550, 8691, 2853, 3761, 8727	0.6965	563	0.6946	566	0	0	3	6
LMCD1	ACTTGGAGTCCATCAGCAAG, CATCTGACCTAGAAGACGAT, CTAGGTCAGATGTTAGGCAG, GATCTTTCCCAGTAGCAATA, GCTGCAGTCAGCAAGAGGTG, GCTTCGAGCCACATTCATGG	6	6143, 521, 4224, 2856, 4131, 4063	0.6973	564	0.6951	567	0	1	5	6
CALCOCO1	GCACTGGGCATGGTGCCTGG, GCTCCAGGATGCGTGCCACA, GCTGATGGAACAGTACAAGG, TAACTTCAGCCACTTCCAGG, TCTCTTCTGTGATCTCCCCA, TGTGTGGTAATCCCGAACAC	6	1065, 2859, 4774, 3826, 6497, 6803	0.698	565	0.6956	568	0	0	4	6
DEPDC1	CAGATAATACCCAGTGAGGG, GACAGACCTATGGAGAGTCA, GAGCTGTCTTACCAGCTTGG, TATCTCGTAGAACTCCTAAA, TGGCAGATAATACCCAGTGA, TTTCACAGCAGGAGAAGCAG	6	7415, 4892, 5196, 2865, 6813, 2437	0.6995	566	0.6965	569	0	0	3	6
PML	AACCCAATAGTACCTCTGTA, AGCAGAGCTGCGCAACCAGT, AGTCGGCCGACTCTTTGCAG, ATAGTACCTCTGTAGGGCTG, GCGCTGCCAGCAATGCCAGG, GCTGTGCTCAGGATGCCTGG	6	6324, 2867, 4776, 2600, 4150, 4870	0.7	567	0.6972	570	0	0	5	6
PARP12	AACAAAGGAGATGGACCCCA, CCGCAGCTCGGGCAACTCCA, CTCACTTCTGGCAAAAGCCA, GGTCACCCAGGTGCTGTGCG, GGTCGTTCTGAAACAAGAGT, TGAAAGGCACAAGAGCCGTG	6	4535, 2512, 2869, 2983, 4456, 3092	0.7004	568	0.6975	571	0	0	6	6
MAK	AAGTTTATAGGAACACACTG, ACTGTCTCATGGTTGTGTAT, ATTCCAGATGATTTGACGAA, GGGAAAACGGAAGTTCATAG, TTAAGTTTATAGGAACACAC, TTATGTATCAAATATTGCAA	6	4448, 3108, 2873, 1641, 2985, 4375	0.7014	569	0.6987	572	0	0	6	6
MEMO1	ATACAGCTAAAGCCATGGAA, CACCAAGATGTCCAACCGAG, GGAAAGTGCACATCGAGAGA, TCAATACGAAGGTCATACAG, TCTAGCTGTGCATTCAGCTG, TGGCTTCTCGGCAGACCACT	6	6765, 5384, 6896, 6087, 1289, 2874	0.7017	570	0.6989	573	0	0	2	6
UHRF2	CTAAAGTAAAGAAAGCTCCG, GCTCCTGTCGTGTATGTGGT, GCTTCTGATGGACAGTCACG, GGCAAAACTCCACTGAAGAA, TAAAGTAAAGAAAGCTCCGA, TTAGGTGGACTATTAGAACA	6	4886, 2876, 6475, 3399, 3384, 1217	0.7021	571	0.6996	574	0	0	5	6
PHF6	AATATCTGAAAACCAGAAGG, ACTAATATCTGAAAACCAGA, CATTGTCCTGGAGCAACAAT, CTTTATCATGCAATGCACAG, GCTCAGTTGAACAGAAAAAA, TCTGATAATGAAAGTCTTGG	6	6021, 7006, 2881, 6051, 2191, 5279	0.7034	573	0.7006	576	0	0	2	6
STK31	AATAACTGTTCCATCTTCAG, ACACTTGTATAGCATCTGAA, ACTGTCTGAAGTTTGCCCCC, GTATGGCAGTGTGGATATAG, TCAACCTTCAGCAGGCCCAA, TTTGATCTATGCCCCCACAA	6	4104, 2883, 4936, 3534, 1341, 3796	0.7039	574	0.7007	577	0	0	6	6
MUC1	CCTCACCTGTAAGCACTGTG, CTGCAGCTCTTGGTAGTAGT, GAACCCGTAACAACTGTTGC, GCATTCTTCTCAGTAGAGCT, GGTCATGCAAGCTCTACCCC, TTTCACCACCACCATGACAC	6	5230, 1533, 5780, 5921, 4338, 2887	0.7048	575	0.7016	578	0	0	3	6
UBE2NL	ACTTGCAGAAGAATACCCAA, GATGATCCTGTGGGGCAGCT, GGTCATTGCTGGGGAATCAA, GGTTTCCTTGATGATCCTGT, GTTTCCTTGATGATCCTGTG, TGGCTCTGCCAGCAAACGCT	6	4580, 1568, 2892, 5623, 5582, 5198	0.7061	577	0.7022	579	0	0	3	6
PADI4	AGACAGCGTGGTCTTCCGCG, GCACAACATGGACTTCTACG, TCAGCATCAACGCCTCCCCA, TCAGGGTCACCTCTACCCCA, TCATGATCCAGGGCGCCACG, TCCCCTGCAGGAGCTCCCCG	6	7648, 7693, 794, 6897, 2901, 6520	0.7083	578	0.7038	580	0	1	2	6
[truncated: 745 more rows]
